# Supplementary material for: Systematic and site-specific analysis of N-sialoglycosylated proteins on the cell surface by integrating click chemistry and MS-based proteomics
Source: Royal Society of Chemistry journal article supplement (doi:10.1039/c5sc01124h), 2015-01-01
Supplement: c5sc01124h2.xlsx [file c5sc01124h2.xlsx]

## Sheet: Surface
Table S1. Identification of 395 unique N-sialoglycosylation sites on cell surface proteins in HEK293T cells
UniProt name	Gene symbol	Site	ModScore	Sequence	XCorr	ppm	Obs m/z	z	Local sequence	Count	Annotation
A2A2V1	PRNP	181	30.612	R.YPNQVYYRPMDEYSNQNNFVHDCVN*ITIK.Q	3.602	0.74	1208.89	3	FVHDCVNITIKQH	4	Major prion protein (Fragment)
A2A2V1	PRNP	197	1000	K.QHTVTTTTKGEN*FTETDVK.M	2.633	0.69	535.763	4	TTTKGENFTETDV	2	Major prion protein (Fragment)
A6ND99	HS2ST1	82	1000	K.YHVLHIN*TTK.N	2.179	0.01	614.832	2	YHVLHINTTKNNP	1	Heparan sulfate 2-O-sulfotransferase 1
A6NGH2	ATP1B1	150	65.44	K.LEWLGN*CSGLNDETYGYK.E	4.554	0.83	1061.47	2	KLEWLGNCSGLND	3	Sodium/potassium-transporting ATPase subunit beta-1 (cDNA FLJ51474, highly similar to Sodium/potassium-transporting ATPase subunit beta-1)
A6NGH2	ATP1B1	185	1000	R.VLGFKPKPPKN*ESLETYPVMK.Y	2.385	-0.79	602.081	4	KPKPPKNESLETY	6	Sodium/potassium-transporting ATPase subunit beta-1 (cDNA FLJ51474, highly similar to Sodium/potassium-transporting ATPase subunit beta-1)
A6QRH1	PLXNB2	127	1000	R.ALSN*ISLR.L	2.218	0.22	438.755	2	ALRALSNISLRLF	1	Plexin-B2 (Fragment)
A8MQ45	JAM2	187	57.711	R.LGSQSTN*SSYTMNTK.T	3.002	5.17	811.371	2	LGSQSTNSSYTMN	1	Junctional adhesion molecule B
A8MWK3	CDH2	294	8.463	R.IVSQAPSTPSPNMFTINN*ETGDIITVAAGLDR.E	3.448	0.55	1111.56	3	NMFTINNETGDII	1	Cadherin-2 (cDNA FLJ53252, highly similar to Cadherin-2)
A8MWK3	CDH2	371	34.326	R.VDIIVAN*LTVTDKDQPHTPAWNAVYR.I	2.864	-0.72	980.509	3	VDIIVANLTVTDK	4	Cadherin-2 (cDNA FLJ53252, highly similar to Cadherin-2)
A8MWK3	CDH2	661	11.721	K.FLEAGIYEVPIIITDSGNPPKSN*ISILR.V	4.201	0.72	1020.56	3	GNPPKSNISILRV	1	Cadherin-2 (cDNA FLJ53252, highly similar to Cadherin-2)
A8MXP9	MATR3	333	10.468	R.RCQLLLEIYPEWNPDN*DTGHTMGDPFMLQQSTNPAPGILGPPPPSFHLGGPAVGPR.G	5.616	-2.03	1219.39	5	PEWNPDNDTGHTM	1	Matrin-3
B1ALU1	LPHN2	458	55.37	K.GPDLSN*CTSHWVNQLAQK.I	2.614	0.42	686.658	3	KGPDLSNCTSHWV	3	Latrophilin-2
B1ALU1	LPHN2	656	1000	R.SLGQFLSTEN*ATIK.L	2.722	-0.91	756.395	2	QFLSTENATIKLG	2	Latrophilin-2
B1ALU1	LPHN2	669	38.189	R.N*STIAVNSHVISVSINK.E	4.674	-0.2	893.483	2	ADFIGRNSTIAVN	2	Latrophilin-2
B1ALU1	LPHN2	712	12.431	R.VYLTDPVLFTLPHIDPDNYFNAN*CSFWN*YSER.T	4.938	0.67	1305.27	3	DNYFNANCSFWNY	2	Latrophilin-2
B1ALU1	LPHN2	717	28.696	R.VYLTDPVLFTLPHIDPDNYFNAN*CSFWN*YSER.T	4.938	0.67	1305.27	3	ANCSFWNYSERTM	2	Latrophilin-2
B1AMW1	CD58	195	15.007	K.IQCTLSNPLFN*TTSSIILTTCIPSSGHSR.H	2.665	0.78	1070.2	3	LSNPLFNTTSSII	2	CD58 antigen, (Lymphocyte function-associated antigen 3), isoform CRA_c (Lymphocyte function-associated antigen 3)
B1AN15	KIAA0319L	395	19.607	K.VIVEGQNAHGEGYVN*VTVKPEPR.K	4.715	0.31	832.431	3	HGEGYVNVTVKPE	5	Dyslexia-associated protein KIAA0319-like protein (Fragment)
B1APY4	ROR2	178	1000	R.YHQCYN*GSGMDYR.G	3.562	-0.53	551.881	3	RYHQCYNGSGMDY	1	Receptor tyrosine kinase-like orphan receptor 2, isoform CRA_b (Tyrosine-protein kinase transmembrane receptor ROR2)
B3KT51	TM2D3	92	1000	R.QRYPAN*CTVR.D	3.38	-0.15	423.208	3	RQRYPANCTVRDH	1	TM2 domain containing 3, isoform CRA_a (TM2 domain-containing protein 3) (cDNA FLJ37636 fis, clone BRCOC2018775, highly similar to Homo sapiens TM2 domain containing 3 (TM2D3), transcript variant 1, mRNA)
B3KW46	SCARB1	61	18.805	R.HKSN*ITFNNN*DTVSFLEYR.T	3.948	0.6	769.034	3	EFRHKSNITFNNN	3	Scavenger receptor class B member 1 (cDNA FLJ42118 fis, clone TESTI2005610, highly similar to Scavenger receptor class B member 1)
B3KW46	SCARB1	67	26.105	R.HKSN*ITFNNN*DTVSFLEYR.T	3.657	0.26	769.034	3	NITFNNNDTVSFL	1	Scavenger receptor class B member 1 (cDNA FLJ42118 fis, clone TESTI2005610, highly similar to Scavenger receptor class B member 1)
B3KXX3	SLC12A6	210	9.34	K.TKEINN*MTVPSK.L	2.563	-0.83	682.852	2	KTKEINNMTVPSK	1	Solute carrier family 12 member 6 (cDNA FLJ46254 fis, clone TESTI4023096, highly similar to Solute carrier family 12 member 6)
B4DET3	NPC1	280	17.009	K.NYKNPN*LTISFTAER.S	2.362	0.73	885.95	2	KNYKNPNLTISFT	1	Niemann-Pick C1 protein (cDNA FLJ51802, highly similar to Niemann-Pick C1 protein)
B4DET3	NPC1	746	1000	R.LIASN*VTETMGIN*GSAYR.V	3.517	0.72	951.967	2	ARLIASNVTETMG	2	Niemann-Pick C1 protein (cDNA FLJ51802, highly similar to Niemann-Pick C1 protein)
B4DET3	NPC1	754	1000	R.LIASN*VTETMGIN*GSAYR.V	3.517	0.72	951.967	2	TETMGINGSAYRV	2	Niemann-Pick C1 protein (cDNA FLJ51802, highly similar to Niemann-Pick C1 protein)
B4DGG1	ITFG3	389	1000	R.YKPDTLAVAVEN*GTGTDR.Q	3.554	0.81	637.318	3	LAVAVENGTGTDR	4	Protein ITFG3 (Uncharacterized protein) (cDNA FLJ60496)
B4DKB2	ECE1	166	1000	K.HLLEN*STASVSEAERK.A	3.535	0.36	591.967	3	IKHLLENSTASVS	2	Endothelin-converting enzyme 1 (cDNA FLJ59212, highly similar to Endothelin-converting enzyme 1 (EC 3.4.24.71))
B4DKB2	ECE1	270	31.275	R.DYYLN*KTENEK.V	2.605	-0.11	710.33	2	SRDYYLNKTENEK	2	Endothelin-converting enzyme 1 (cDNA FLJ59212, highly similar to Endothelin-converting enzyme 1 (EC 3.4.24.71))
B4DKB2	ECE1	539	1000	R.FFN*FSWR.V	1.87	0.39	503.737	2	NAMRFFNFSWRVT	1	Endothelin-converting enzyme 1 (cDNA FLJ59212, highly similar to Endothelin-converting enzyme 1 (EC 3.4.24.71))
B4DN67	KIRREL	40	1000	R.IDGGPVILLQAGTPHN*LTCR.A	4.584	0.24	712.377	3	QAGTPHNLTCRAF	1	Kin of IRRE-like protein 1 (cDNA FLJ56360, highly similar to Kin of IRRE-like protein 1)
B4DN67	KIRREL	197	26.105	K.VGSTN*VSTLVNVHFAPR.I	2.89	-0.65	600.987	3	NKVGSTNVSTLVN	2	Kin of IRRE-like protein 1 (cDNA FLJ56360, highly similar to Kin of IRRE-like protein 1)
B4DTR1	ERBB2	254	1000	R.GHCWGPGPTQCVN*CSQFLR.G	3.554	0.69	755.328	3	GPTQCVNCSQFLR	3	Receptor tyrosine-protein kinase erbB-2 (cDNA FLJ59426, highly similar to Receptor tyrosine-protein kinase erbB-2 (EC 2.7.10.1))
B4DU28	ADAM10	236	81.703	R.EGICN*GFTALCPASDPKPN*FTDCNR.H	3.227	0.31	949.744	3	AREGICNGFTALC	2	Disintegrin and metalloproteinase domain-containing protein 10 (cDNA FLJ57594, highly similar to ADAM 10 (EC 3.4.24.81) (Adisintegrin and metalloproteinase domain 10))
B4DU28	ADAM10	250	14.062	R.EGICN*GFTALCPASDPKPN*FTDCNR.H	3.227	0.31	949.744	3	ASDPKPNFTDCNR	2	Disintegrin and metalloproteinase domain-containing protein 10 (cDNA FLJ57594, highly similar to ADAM 10 (EC 3.4.24.81) (Adisintegrin and metalloproteinase domain 10))
B4DWL3	LAMP1	84	1000	R.SSCGKEN*TSDPSLVIAFGR.G	3.043	-0.14	676.658	3	SSCGKENTSDPSL	2	Lysosome-associated membrane glycoprotein 1 (cDNA FLJ57633, highly similar to Lysosome-associated membrane glycoprotein 1)
B4DWL3	LAMP1	121	1000	R.YSVQLMSFVYN*LSDTHLFPN*ASSK.E	3.55	2.94	1377.66	2	LMSFVYNLSDTHL	1	Lysosome-associated membrane glycoprotein 1 (cDNA FLJ57633, highly similar to Lysosome-associated membrane glycoprotein 1)
B4DWL3	LAMP1	130	1000	R.YSVQLMSFVYN*LSDTHLFPN*ASSK.E	3.55	2.94	1377.66	2	DTHLFPNASSKET	1	Lysosome-associated membrane glycoprotein 1 (cDNA FLJ57633, highly similar to Lysosome-associated membrane glycoprotein 1)
B4E2S7	LAMP2	28	97.635	K.TVTISDHGTVTYN*GSICGDDQNGPK.I	4.049	0.54	880.398	3	HGTVTYNGSICGD	3	Lysosome-associated membrane glycoprotein 2 (cDNA FLJ58780, highly similar to Homo sapiens lysosomal-associated membrane protein 2 (LAMP2), transcript variant LAMP2B, mRNA)
B4E2S7	LAMP2	54	1000	K.IAVQFGPGFSWIAN*FTK.A	3.383	1.63	943.492	2	GFSWIANFTKAAS	1	Lysosome-associated membrane glycoprotein 2 (cDNA FLJ58780, highly similar to Homo sapiens lysosomal-associated membrane protein 2 (LAMP2), transcript variant LAMP2B, mRNA)
B4E2S7	LAMP2	210	20.167	K.VASVININPN*TTHSTGSCR.S	2.95	-0.15	677.665	3	VININPNTTHSTG	1	Lysosome-associated membrane glycoprotein 2 (cDNA FLJ58780, highly similar to Homo sapiens lysosomal-associated membrane protein 2 (LAMP2), transcript variant LAMP2B, mRNA)
B4E2W4	FKTN	92	69.383	K.NFEQVKN*TSHGSTSQCK.F	2.752	0.23	652.299	3	NFEQVKNTSHGST	1	Fukutin (cDNA FLJ58999, highly similar to Fukutin (EC 2.-.-.-))
B7Z1K9	ST8SIA5	92	1000	R.YFEFYEGPFEYN*STR.C	2.015	0.68	976.418	2	EGPFEYNSTRCLE	1	Alpha-2,8-sialyltransferase 8E (cDNA FLJ60231, highly similar to Alpha-2,8-sialyltransferase 8E (EC 2.4.99.-))
B7Z1N7	ATP1B3	110	1000	K.FLKPYTLEEQKN*LTVCPDGALFEQK.G	2.906	-0.07	595.106	5	TLEEQKNLTVCPD	5	Sodium/potassium-transporting ATPase subunit beta-3 (cDNA FLJ50753, highly similar to Sodium/potassium-transporting ATPase subunit beta-3)
B7Z658	CACNA2D1	88	1000	R.HLVN*ISVYAFN*K.S	2.222	-0.02	705.874	2	LMRHLVNISVYAF	4	Voltage-dependent calcium channel subunit alpha-2-1 (cDNA FLJ50197, highly similar to Dihydropyridine-sensitive L-type calcium channel subunits alpha- 2/delta)
B7Z658	CACNA2D1	95	1000	R.HLVN*ISVYAFN*K.S	2.222	-0.02	705.874	2	ISVYAFNKSYDYQ	4	Voltage-dependent calcium channel subunit alpha-2-1 (cDNA FLJ50197, highly similar to Dihydropyridine-sensitive L-type calcium channel subunits alpha- 2/delta)
B7Z6U3	ACP2	92	1000	R.YHGFLN*TSYHR.Q	3.041	0.35	466.554	3	RYHGFLNTSYHRQ	1	Lysosomal acid phosphatase (cDNA FLJ51107, highly similar to Lysosomal acid phosphatase (EC 3.1.3.2))
B7Z6U3	ACP2	133	0	R.FNPN*ISWQPIPVHTVPITEDR.Q	2.863	-1.93	1232.13	2	MQRFNPNISWQPI	2	Lysosomal acid phosphatase (cDNA FLJ51107, highly similar to Lysosomal acid phosphatase (EC 3.1.3.2))
B7ZMG0	PTPRK	462	75.738	K.APQHVVNHLPPYTN*VSLK.M	2.87	0.18	673.03	3	HLPPYTNVSLKMI	1	PTPRK protein (Receptor-type tyrosine-protein phosphatase kappa)
B8ZZ84	LRRTM4	59	1000	K.IVYCESHAFADIPEN*ISGGSQGLSLR.F	3.004	-0.68	941.788	3	FADIPENISGGSQ	1	Leucine-rich repeat transmembrane neuronal protein 4
C9IYZ9	ATG9A	99	1000	K.MVN*HSLHPTEPVK.V	3.424	0.41	497.922	3	FANKMVNHSLHPT	1	Autophagy-related protein 9A (Fragment)
C9J4M7	SEMA4C	106	9.34	K.GKNN*QTECFNFIR.F	3.41	0.14	815.88	2	IQKGKNNQTECFN	1	Semaphorin-4C (Fragment)
C9J4M7	SEMA4C	121	1000	R.FLQPYN*ASHLYVCGTYAFQPK.C	2.579	-0.25	836.403	3	RFLQPYNASHLYV	3	Semaphorin-4C (Fragment)
C9J4Y6	GPC1	66	1000	R.SFDDHFQHLLN*DSER.T	2.659	-0.26	621.611	3	HFQHLLNDSERTL	3	Glypican-1 (Fragment)
C9J519	KIAA0319L	327	18.225	R.ALEVNTVTCQLN*CSDHGHCDSFTK.R	3.849	1.02	932.736	3	TVTCQLNCSDHGH	1	Dyslexia-associated protein KIAA0319-like protein
C9J5S7	PPIA	108	20.167	K.HTGPGILSMANAGPNTN*GSQFFICTAK.T	3.677	-0.87	932.11	3	NAGPNTNGSQFFI	1	Peptidyl-prolyl cis-trans isomerase (EC 5.2.1.8)
C9J5X1	IGF1R	244	50.46	R.ACTENNECCHPECLGSCSAPDN*DTACVACR.H	4.54	-0.6	1173.43	3	SCSAPDNDTACVA	2	Tyrosine-protein kinase receptor (EC 2.7.10.1)
C9J5X1	IGF1R	640	6.591	K.WNPPSLPNGN*LSYYIVR.W	2.697	-0.75	997.006	2	PSLPNGNLSYYIV	3	Tyrosine-protein kinase receptor (EC 2.7.10.1)
C9J5X1	IGF1R	913	1000	R.IQATSLSGN*GSWTDPVFFYVQAK.R	4.059	-0.13	840.416	3	ATSLSGNGSWTDP	3	Tyrosine-protein kinase receptor (EC 2.7.10.1)
C9J795	PVRL3	78	12.431	R.VLFKN*YSLNDATITLHNIGFSDSGK.Y	3.568	1.09	919.805	3	GRVLFKNYSLNDA	7	Poliovirus receptor-related protein 3 (Fragment)
C9J991	CHST12	209	34.206	R.EHVHN*ASAHLTFNK.F	2.58	-0.51	536.598	3	PREHVHNASAHLT	1	Carbohydrate sulfotransferase 12 (Fragment)
C9J9E8	PTK7	116	76.733	R.SAN*ASFNIK.C	2.913	0.27	477.743	2	EEARSANASFNIK	1	Inactive tyrosine-protein kinase 7
C9JAK3	RAET1G	82	1000	K.KLN*VTTAWK.A	3.054	1.11	532.306	2	PLGKKLNVTTAWK	1	Retinoic acid early transcript 1G protein
C9JBF5	HYAL2	103	1000	R.SVHGGVPQN*VSLWAHR.K	2.344	2.38	873.952	2	HGGVPQNVSLWAH	2	Hyaluronidase (EC 3.2.1.35) (Hyaluronoglucosaminidase) (Fragment)
C9JH43	NRCAM	270	16.964	R.ERPPTFLTPEGN*ASNKEELR.G	2.672	-0.01	572.791	4	FLTPEGNASNKEE	2	Neuronal cell adhesion molecule (Fragment)
C9JNC3	BTN2A1	53	1000	R.GSVALVIHN*ITAQEN*GTYR.C	3.066	0.12	683.684	3	VALVIHNITAQEN	4	Butyrophilin subfamily 2 member A1 (Fragment)
C9JNC3	BTN2A1	59	1000	R.GSVALVIHN*ITAQEN*GTYR.C	3.066	0.12	683.684	3	NITAQENGTYRCY	4	Butyrophilin subfamily 2 member A1 (Fragment)
C9JRP1	SLC4A7	672	23.624	K.LTSYSCVCTEPPNPSN*ETLAQWK.K	2.669	1.01	895.741	3	EPPNPSNETLAQW	1	Sodium bicarbonate cotransporter 3 (Fragment)
C9JV86	CD63	130	0	K.NN*HTASILDR.M	3.072	0.27	572.286	2	ENYPKNNHTASIL	2	CD63 antigen
C9JV86	CD63	150	1000	K.CCGAAN*YTDWEKIPSMSK.N	2.526	1.89	707.639	3	KCCGAANYTDWEK	1	CD63 antigen
C9JV86	CD63	172	11.22	K.NRVPDSCCIN*VTVGCGINFNEK.A	4.056	0.81	852.723	3	PDSCCINVTVGCG	1	CD63 antigen
C9JXA2	EPHA3	493	1000	R.GTN*VTISSLKPDTIYVFQIR.A	3.19	3.12	1128.12	2	LRARGTNVTISSL	5	Ephrin type-A receptor 3
C9JXX7	ITGA6	170	1000	R.AN*HSGAVVLLK.R	3.188	-0.75	556.321	2	SGAPRANHSGAVV	1	Integrin alpha-6 heavy chain (Fragment)
C9JYM4	GOLM1	109	24.437	K.AVLVNN*ITTGER.L	2.262	1.77	645.352	2	KAVLVNNITTGER	2	Golgi membrane protein 1 (Fragment)
C9JYN0	SYPL1	53	38.371	K.GQTEIQVNCPPAVTEN*K.T	3.568	-0.1	944.454	2	PPAVTENKTVTAT	4	Synaptophysin-like protein 1
C9JYY6	NRCAM	839	5.75	R.VNVVN*STLAEVHWDPVPLK.S	3.909	2.1	1060.57	2	VRVNVVNSTLAEV	2	Neuronal cell adhesion molecule
D6RBV2	LMAN2	183	0	R.VFPYISVMVNN*GSLSYDHSK.D	3.11	0.53	1130.55	2	ISVMVNNGSLSYD	6	Vesicular integral-membrane protein VIP36
D6RDV5	EFNA5	37	53.534	R.YAVYWN*SSNPR.F	2.574	-1.01	680.314	2	RYAVYWNSSNPRF	1	Ephrin-A5
D6RE16	UNC5C	236	1000	R.LSDTAN*YTCVAK.N	2.386	1.62	673.314	2	RLSDTANYTCVAK	1	Netrin receptor UNC5C
D6RG08	ITGA2	105	80.999	K.LNLQTSTSIPN*VTEM^K.T	3.767	1.13	897.957	2	TSTSIPNVTEMKT	5	Integrin alpha-2
E5RFG2	SEMA4G	111	6.591	K.GKNN*QTECFNHVR.F	2.658	0.37	536.248	3	HQKGKNNQTECFN	1	Semaphorin-4G (Fragment)
E5RFZ8	SLC39A14	77	1000	R.GN*VTQHVQGHR.N	2.321	-0.13	412.542	3	VGVGRGNVTQHVQ	1	Zinc transporter ZIP14 (Fragment)
E7EMF1	ITGA2	460	109.11	R.AN*YTGQIVLYSVNENGN*ITVIQAHR.G	3.003	0.96	927.472	3	AGAPRANYTGQIV	1	Integrin alpha-2
E7EMF1	ITGA2	475	4.085	R.AN*YTGQIVLYSVNENGN*ITVIQAHR.G	2.627	-0.64	927.47	3	SVNENGNITVIQA	1	Integrin alpha-2
E7EMR3	LPHN3	772	42.869	K.LGTEALSTN*HSVIVNSPVITAAINK.E	4.56	-0.32	851.465	3	TEALSTNHSVIVN	2	Latrophilin-3
E7ENA9	NCSTN	129	1000	R.TSLELWMHTDPVSQKN*ESVR.N	3.692	0.44	787.386	3	DPVSQKNESVRNQ	7	Nicastrin
E7ENA9	NCSTN	159	1000	R.RPN*QSQPLPPSSLQR.F	3.256	1.15	854.456	2	VILRRPNQSQPLP	4	Nicastrin
E7ENA9	NCSTN	304	1000	R.SYLGDGPLQHYIAVSSPTN*TTYVVQYALAN*LTGTVVN*LTR.E	3.477	2.18	1436.07	3	AVSSPTNTTYVVQ	3	Nicastrin
E7ENA9	NCSTN	315	1000	R.SYLGDGPLQHYIAVSSPTN*TTYVVQYALAN*LTGTVVN*LTR.E	3.477	2.18	1436.07	3	VQYALANLTGTVV	3	Nicastrin
E7ENA9	NCSTN	322	1000	R.SYLGDGPLQHYIAVSSPTN*TTYVVQYALAN*LTGTVVN*LTR.E	3.477	2.18	1436.07	3	LTGTVVNLTREQC	3	Nicastrin
E7ENA9	NCSTN	354	32.413	K.VPSENKDLYEYSWVQGPLHSN*ETDRLPR.C	3.382	0.01	667.327	5	QGPLHSNETDRLP	7	Nicastrin
E7EP60	ITGA4	79	44.278	R.WLLVGAPTANWLAN*ASVINPGAIYR.C	5.338	1.55	1335.72	2	TANWLANASVINP	1	Integrin alpha-4 (Fragment)
E7EP60	ITGA4	480	1000	R.TRPVVIVDASLSHPESVN*R.T	3.911	0.23	693.708	3	SHPESVNRTKFDC	3	Integrin alpha-4 (Fragment)
E7EPC6	CD44	57	1000	K.AFN*STLPTMAQMEK.A	2.049	-0.29	786.37	2	DLCKAFNSTLPTM	1	CD44 antigen
E7EQW5	ITGB1	50	4.16	K.SCGECIQAGPNCGWCTN*STFLQEGMPTSAR.C	3.416	-1.42	1127.13	3	NCGWCTNSTFLQE	2	Integrin beta (Fragment)
E7EU09	FGFR1	173	1000	R.SPHRPILQAGLPAN*K.T	2.491	0.18	534.639	3	QAGLPANKTVALG	2	Fibroblast growth factor receptor (EC 2.7.10.1)
E7EUY0	PRKDC	3112	46.129	K.YYIQNGIQSFMQN*YSSIDVLLHQSR.L	3.449	0.18	1003.16	3	IQSFMQNYSSIDV	1	DNA-dependent protein kinase catalytic subunit
E7EVZ5	PCYOX1L	288	28.529	K.LFPFANILTTDFPSFFCTLDNICPVN*ISASFR.R	3.978	0.45	1243.27	3	DNICPVNISASFR	1	Prenylcysteine oxidase-like
E7EX60	NRP1	150	1000	K.RGPECSQN*YTTPSGVIK.S	3.321	0.44	632.972	3	GPECSQNYTTPSG	4	Neuropilin-1
E7EX60	NRP1	522	9.34	K.IGYSNN*GSDWK.M	2.543	-0.29	622.277	2	KIGYSNNGSDWKM	1	Neuropilin-1
E9PD35	FLT4	527	17.009	K.LVIQNAN*VSAMYK.C	2.404	-0.19	727.384	2	LVIQNANVSAMYK	2	Vascular endothelial growth factor receptor 3
E9PDC5	PTPRS	734	1000	R.KVEAEALN*ATAIR.V	2.511	-0.54	463.592	3	VEAEALNATAIRV	1	Receptor-type tyrosine-protein phosphatase S
E9PE72	ENPP1	285	1000	K.MN*ASFSLK.S	2.102	0.48	450.723	2	MYDPKMNASFSLK	2	Alkaline phosphodiesterase I
E9PE72	ENPP1	341	1000	K.MYN*GSVPFEER.I	2.452	0.08	666.295	2	DIYKMYNGSVPFE	1	Alkaline phosphodiesterase I
E9PEM5	LRBA	229	1000	K.WPYQN*GFTFHTWLR.M	3.452	0.52	619.299	3	AKWPYQNGFTFHT	1	Lipopolysaccharide-responsive and beige-like anchor protein
E9PFD7	EGFR	550	9.34	K.TCPAGVMGEN*NTLVWK.Y	4.824	-0.07	890.418	2	AGVMGENNTLVWK	1	Epidermal growth factor receptor
E9PHX8	MERTK	278	1000	R.ISVQVHN*ATCTVR.I	2.938	0.45	744.38	2	ISVQVHNATCTVR	1	Tyrosine-protein kinase Mer
E9PIA8	PPT1	122	31.596	R.LVQAEYWHDPIKEDVYRN*HSIFLADINQER.G	2.953	0.48	741.171	5	KEDVYRNHSIFLA	1	Palmitoyl-protein thioesterase 1 (Fragment)
E9PJC4	TM9SF1	178	1000	R.IIFAN*VSVR.D	2.429	0.44	511.3	2	DRIIFANVSVRDV	1	Transmembrane 9 superfamily member 1 (Fragment)
E9PJC8	CD151	159	6.591	K.RYHQPGHEAVTSAVDQLQQEFHCCGSN*NSQDWR.D	5.254	0.98	986.934	4	FHCCGSNNSQDWR	6	CD151 antigen (Fragment)
E9PKB0	SORL1	601	84.609	K.SRN*STVEYTLNK.L	3.056	-0.03	707.857	2	YKVKSRNSTVEYT	1	Sortilin-related receptor
F2Z3B8	PTPRF	78	1000	K.VEVEPLN*STAVHVYWK.L	2.327	1.18	625.325	3	VEVEPLNSTAVHV	7	Receptor-type tyrosine-protein phosphatase F
F2Z3B8	PTPRF	314	127.526	R.DINSQQELQN*ITTDTR.F	4.974	1.19	939.951	2	SQQELQNITTDTR	1	Receptor-type tyrosine-protein phosphatase F
F5GXJ9	ALCAM	44	48.315	R.LNLSEN*YTLSISNAR.I	2.948	-0.53	849.433	2	RLNLSENYTLSIS	2	CD166 antigen
F5GXJ9	ALCAM	429	65.263	K.IIISPEEN*VTLTCTAENQLER.T	2.772	3.93	1217.11	2	IISPEENVTLTCT	5	CD166 antigen
F5GXJ9	ALCAM	448	24.243	R.TVNSLN*VSAISIPEHDEADEISDENR.E	2.887	0.5	953.113	3	RTVNSLNVSAISI	2	CD166 antigen
F5GXU0	M6PR	83	119.224	R.EAGN*HTSGAGLVQINK.S	2.548	0.46	533.606	3	VCREAGNHTSGAG	2	Cation-dependent mannose-6-phosphate receptor (Fragment)
F5GYM7	NPTN	79	58.433	R.KKENGMPMDIVN*TSGR.F	2.237	0.55	593.959	3	MPMDIVNTSGRFF	3	Neuroplastin
F5GZD0	NPTN	197	42.098	K.N*ASNMEYR.I	1.917	0.99	494.208	2	LSATRKNASNMEY	1	Neuroplastin
F5H061	TNFRSF1A	54	9.34	K.YIHPQN*NSICCTK.C	2.911	4.75	819.372	2	KYIHPQNNSICCT	1	Tumor necrosis factor receptor superfamily member 1A, membrane form
F5H0H5	CADM1	18	1000	K.DTAVEGEEIEVN*CTAM^ASKPATTIR.W	3.181	1.15	904.759	3	GEEIEVNCTAMAS	3	Cell adhesion molecule 1 (Fragment)
F5H125	CADM1	68	1000	R.FQLLN*FSSSELK.V	2.86	0.21	708.369	2	SRFQLLNFSSSEL	2	Cell adhesion molecule 1 (Fragment)
F5H125	CADM1	80	1000	K.VSLTN*VSISDEGR.Y	3.424	1.13	690.349	2	LKVSLTNVSISDE	3	Cell adhesion molecule 1 (Fragment)
F5H1G4	NRP2	152	1000	K.TGSEDCSKN*FTSPN*GTIESPGFPEK.Y	3.761	0.27	898.062	3	SEDCSKNFTSPNG	1	Neuropilin-2
F5H1G4	NRP2	157	1000	K.TGSEDCSKN*FTSPN*GTIESPGFPEK.Y	3.761	0.27	898.062	3	KNFTSPNGTIESP	1	Neuropilin-2
F5H241	GBA	72	1000	R.TYTYADTPDDFQLHN*FSLPEEDTK.L	2.056	0.07	950.755	3	DDFQLHNFSLPEE	2	Glucosylceramidase
F5H2E7	LTBR	70	1000	K.AGHFQN*TSSPSAR.C	2.189	-2.98	681.816	2	KAGHFQNTSSPSA	2	Tumor necrosis factor receptor superfamily member 3
F5H3L5	PCDH1	791	1000	R.YGTALVHLYVN*ETLAN*R.T	3.636	0.08	647.335	3	LVHLYVNETLANR	1	Protocadherin-1
F5H3L5	PCDH1	796	1000	R.YGTALVHLYVN*ETLAN*R.T	3.636	0.08	647.335	3	VNETLANRTLLET	1	Protocadherin-1
F5H6B2	TMEM2	525	1000	K.N*FTSVHLSYVELK.H	2.876	-0.09	770.401	2	HIMIMKNFTSVHL	3	Transmembrane protein 2
F6U0H7	HLA-B	121	1000	R.GYYN*QSEAGSHTLQSM^YGCDVGPDGR.L	4.075	3.36	956.732	3	NLRGYYNQSEAGS	3	HLA class I histocompatibility antigen, B-56 alpha chain (Fragment)
F8VPA6	ERGIC2	212	22.492	R.GHAHLAALVNHESYN*FSHR.I	3.039	0.18	721.684	3	VNHESYNFSHRID	4	Endoplasmic reticulum-Golgi intermediate compartment protein 2 (Fragment)
F8VR29	CPM	38	1000	K.TVAQN*YSSVTHLHSIGK.S	3.169	0.35	461.99	4	LKTVAQNYSSVTH	2	Carboxypeptidase M
F8VSZ4	PLXNA1	678	1000	R.VN*VSEDCPQILPSTQIYVPVGVVKPITLAAR.N	4.041	0.7	1122.95	3	FLEGRVNVSEDCP	1	Plexin-A1
F8VSZ4	PLXNA1	1020	42.869	R.AQLTNPEVKYN*YTEDPTILR.I	3.891	-0.21	790.069	3	NPEVKYNYTEDPT	1	Plexin-A1
F8VSZ4	PLXNA1	1117	1000	R.SLLVLN*STSFLYYPDPVLEPLSPTGLLELKPSSPLILK.G	3.754	1.48	1386.45	3	RSLLVLNSTSFLY	1	Plexin-A1
F8W6X9	SDK1	782	87.719	R.TN*QSIMVQWQPPPETEHNGVLR.G	3.566	0.3	855.42	3	VASGRTNQSIMVQ	3	Protein sidekick-1
F8W6X9	SDK1	1024	1000	R.LTHTLN*STTHEYK.I	3.208	-0.36	516.591	3	RLTHTLNSTTHEY	2	Protein sidekick-1
F8W6X9	SDK1	1333	1000	R.GN*HTQSALLAGLR.K	2.592	-1.94	670.861	2	SHIVRGNHTQSAL	1	Protein sidekick-1
F8W7F7	TMED4	117	1000	R.FTFTSHTPGDHQICLHSN*STR.M	5.24	0.92	816.042	3	QICLHSNSTRMAL	1	Transmembrane emp24 domain-containing protein 4
F8W9L4	FGFR3	262	1000	R.SPHRPILQAGLPAN*QTAVLGSDVEFHCK.V	2.909	-0.07	762.142	4	QAGLPANQTAVLG	4	Fibroblast growth factor receptor (EC 2.7.10.1)
F8WAD8	ADAM22	486	51.809	R.ETCSGN*SSQCAPNIHK.M	3.516	-0.86	896.877	2	RETCSGNSSQCAP	1	Disintegrin and metalloproteinase domain-containing protein 22 (Fragment)
G3V0E5	TFRC	170	1000	K.KDFEDLYTPVN*GSIVIVR.A	4.013	0.32	1034.55	2	DLYTPVNGSIVIV	4	Transferrin receptor (P90, CD71), isoform CRA_c (Transferrin receptor protein 1, serum form)
G3XAD5	PTPRD	711	1000	R.KVEVEAVN*STSVK.V	3.316	0.76	464.921	3	VEVEAVNSTSVKV	2	Protein tyrosine phosphatase, receptor type, D, isoform CRA_c (Receptor-type tyrosine-protein phosphatase delta)
G5E994	GPR107	169	104.477	K.VLGQSQEPNVNPASAGN*QTQK.T	4.63	1.13	1085.54	2	NPASAGNQTQKTQ	1	G protein-coupled receptor 107, isoform CRA_c (Protein GPR107)
H0Y6J7	PLXNB2	117	1000	R.TEAGAFEYVPDPTFEN*FTGGVKK.Q	3.164	-0.79	836.4	3	PDPTFENFTGGVK	3	Plexin-B2 (Fragment)
H0YGE9	M6PR	53	55.461	R.LN*ETHIFN*GSNWIMLIYK.G	3.68	0.57	733.703	3	TVVGRLNETHIFN	1	Cation-dependent mannose-6-phosphate receptor (Fragment)
H0YGE9	M6PR	59	45.026	R.LN*ETHIFN*GSNWIMLIYK.G	3.68	0.57	733.703	3	NETHIFNGSNWIM	1	Cation-dependent mannose-6-phosphate receptor (Fragment)
H0YK40	CD276	91	1000	K.QLVHSFAEGQDQGSAYAN*R.T	2.962	1.81	694.325	3	QGSAYANRTALFP	9	CD276 antigen (Fragment)
H0YK40	CD276	104	1000	R.TALFPDLLAQGN*ASLR.L	3.454	-0.26	845.456	2	DLLAQGNASLRLQ	1	CD276 antigen (Fragment)
H0YL10	CD276	106	1000	R.VVLGAN*GTYSCLVR.N	2.257	-2.29	756.391	2	RVVLGANGTYSCL	20	CD276 antigen (Fragment)
H0YMD1	LDLR	657	156.827	R.LTGSDVNLLAENLLSPEDMVLFHN*LTQPR.G	4.83	2.06	1080.56	3	DMVLFHNLTQPRG	1	Low-density lipoprotein receptor
H0YNA7	SPPL2A	107	1000	R.DMN*QTLGDN*ITVK.M	3.387	1.1	727.845	2	KDFRDMNQTLGDN	1	Signal peptide peptidase-like 2A (Fragment)
H0YNA7	SPPL2A	113	1000	R.DMN*QTLGDN*ITVK.M	3.387	1.1	727.845	2	NQTLGDNITVKMY	1	Signal peptide peptidase-like 2A (Fragment)
H0YNK6	TYRO3	185	1000	R.TATVHLQALPAAPFN*ITVTK.L	2.597	-1	699.392	3	LPAAPFNITVTKL	1	Tyrosine-protein kinase receptor TYRO3
H2N331	ITGA7	86	1000	R.QLQPRPQSWLLVGAPQALALPGQQAN*R.T	3.664	1.77	980.875	3	LPGQQANRTGGLF	1	Integrin alpha-7 (Integrin, alpha 7, isoform CRA_e)
H2N331	ITGA7	742	2.806	R.ALDPAEKPLCLSNEN*ASHVECELGNPMK.R	2.33	0.59	782.367	4	LCLSNENASHVEC	2	Integrin alpha-7 (Integrin, alpha 7, isoform CRA_e)
H2N331	ITGA7	945	1000	K.KKN*ITLDCAR.G	2.481	-0.03	407.888	3	SAEKKKNITLDCA	1	Integrin alpha-7 (Integrin, alpha 7, isoform CRA_e)
H3BM42	GLG1	210	1000	R.GN*ITEYQCHQYITK.M	3.681	-0.01	879.406	2	LVDHRGNITEYQC	1	Golgi apparatus protein 1 (Golgi apparatus protein 1, isoform CRA_c)
H3BM42	GLG1	581	1000	R.LCHTHGWN*ETSEFMPQGAVFSCLYR.H	3.197	0	1010.78	3	CHTHGWNETSEFM	2	Golgi apparatus protein 1 (Golgi apparatus protein 1, isoform CRA_c)
H3BQ21	SIRPB1	82	1000	R.GTAN*LSETIR.V	2.332	1.04	532.778	2	PLRGTANLSETIR	2	Signal-regulatory protein beta-1 isoform 3 (Fragment)
H7BYX6	NCAM1	458	24.243	R.DGQLLPSSN*YSNIK.I	2.881	0.2	769.883	2	QLLPSSNYSNIKI	1	Neural cell adhesion molecule 1
H7BZ97	ITGA6	94	27.121	R.KYQTLN*CSVNVNCVNIR.C	3.509	0.21	695.675	3	RKYQTLNCSVNVN	4	Integrin alpha-6 heavy chain (Fragment)
H7BZG1	ITGAV	25	1000	K.ISSLQTTEKN*DTVAGQGER.D	3.319	0.42	679.671	3	LQTTEKNDTVAGQ	3	Integrin alpha-V light chain (Fragment)
H7C0V4	RTN4R	392	1000	R.VPPGDSPPGN*GSGPR.H	2.25	0.71	697.334	2	GDSPPGNGSGPRH	1	Reticulon-4 receptor (Fragment)
H7C285	TSPAN15	98	76.287	R.N*TTEVVNTMCGYK.T	2.788	-0.95	760.336	2	YTCCIRNTTEVVN	1	Tetraspanin-15 (Fragment)
H7C2P2	SDK2	124	1000	R.VTHYLPN*VTLEYR.V	3.376	0.03	536.615	3	VTHYLPNVTLEYR	1	Protein sidekick-2 (Fragment)
H7C2P2	SDK2	278	1000	K.IQTLQAPPDM^APAN*VSLR.T	3.35	1.31	971.005	2	PDMAPANVSLRTA	6	Protein sidekick-2 (Fragment)
H7C2P2	SDK2	381	1000	R.ESVPSSGPTN*VSALATTSSSMLVR.W	3.929	1.93	1191.09	2	PSSGPTNVSALAT	2	Protein sidekick-2 (Fragment)
H7C2P2	SDK2	432	1000	R.FWLVEGN*SSR.S	2.647	-0.24	599.293	2	FWLVEGNSSRSAQ	1	Protein sidekick-2 (Fragment)
H7C2P2	SDK2	633	1000	R.WALHSASVSHN*ASSFIVDR.L	3.99	0.75	696.345	3	SASVSHNASSFIV	2	Protein sidekick-2 (Fragment)
H7C4L0	PVRL3	232	21.814	R.LDGQWPDGLLASDNTLHFVHPLTFN*YSGVYICK.V	4.586	-0.29	945.962	4	VHPLTFNYSGVYI	2	Poliovirus receptor-related protein 3 (Fragment)
H7C4N8	ITGB1	11	11.22	R.KEN*SSEICSNNGECVCGQCVCR.K	4.919	-0.4	884.015	3	AYCRKENSSEICS	4	Integrin beta-1 (Fragment)
H7C5L0	PTK7	36	1000	R.RATVFAN*GSLLLTQVRPR.N	3.692	-0.11	668.053	3	RATVFANGSLLLT	1	Inactive tyrosine-protein kinase 7 (Fragment)
H7C5Z8	FAS	136	19.846	R.CKPNFFCN*STVCEHCDPCTK.C	4.169	-0.21	855.339	3	KPNFFCNSTVCEH	1	Tumor necrosis factor receptor superfamily member 6
H9KV31	NCAM2	332	49.59	R.YN*CTATNHIGTR.F	2.25	-0.5	470.882	3	NDFGRYNCTATNH	1	Neural cell adhesion molecule 2
I3L192	BSG	36	1000	K.ILLTCSLN*DSATEVTGHR.W	2.19	0.35	663.998	3	LLTCSLNDSATEV	9	Basigin (Fragment)
I3L192	BSG	144	1000	K.ALMN*GSESR.F	2.224	0.35	484.224	2	EDKALMNGSESRF	5	Basigin (Fragment)
I3L1V9	ATP1B2	36	1000	K.FLEPYN*DSIQAQK.N	2.936	0.38	778.38	2	KFLEPYNDSIQAQ	1	Sodium/potassium-transporting ATPase subunit beta-2 (Fragment)
I3L1V9	ATP1B2	77	1000	R.TQLGN*CSGIGDSTHYGYSTGQPCVFIK.M	3.834	-0.32	984.112	3	NRTQLGNCSGIGD	7	Sodium/potassium-transporting ATPase subunit beta-2 (Fragment)
I3L1V9	ATP1B2	156	1000	K.FHVN*YTQPLVAVK.F	2.24	0.52	759.914	2	GKKFHVNYTQPLV	1	Sodium/potassium-transporting ATPase subunit beta-2 (Fragment)
J3KQG4	GBA	11	1000	-.MELSMGPIQAN*HTGTGLLLTLQPEQK.F	3.21	1	937.483	3	MGPIQANHTGTGL	1	Glucosylceramidase
J3KSI6	DSG2	182	115.01	K.IN*ATDADEPNTLNSK.I	4.07	-0.19	803.378	2	TLVMKINATDADE	1	Desmoglein-2
J3QQJ4	CPD	20	43.066	R.GILN*ATISVAEINHPVTTYK.T	3.534	1.86	1072.58	2	DGRGILNATISVA	5	Carboxypeptidase D (Fragment)
J3QRJ9	CPD	14	9.34	R.GKDLDTDFTNN*ASQPETK.A	4.137	-0.12	992.455	2	DTDFTNNASQPET	1	Carboxypeptidase D (Fragment)
J3QRL0	C1orf159	92	1000	R.SFAGPGAPFPMN*R.S	2.212	1.44	676.322	2	GAPFPMNRSSGTP	1	Uncharacterized protein C1orf159 (Fragment)
J3QSR7	KIAA1549	1176	109.529	R.ATVAAGNSVVQVVN*VSR.L	4.305	0.62	837.457	2	SVVQVVNVSRLEG	1	UPF0606 protein KIAA1549
K4DIA0	ICOSLG	70	49.59	K.TVVTYHIPQN*SSLENVDSR.Y	3.326	1.19	721.359	3	TYHIPQNSSLENV	1	ICOS ligand (Inducible T-cell co-stimulator ligand, isoform CRA_b)
K7EKV5	CD97	38	26.927	R.WCPQNSSCVN*ATACR.C	3.123	1.91	907.37	2	QNSSCVNATACRC	4	CD97 antigen subunit alpha (Fragment)
K7EN15	CANT1	88	37.54	R.LGQAPANWYN*DTYPLSPPQR.T	4.601	2.07	1146.05	2	APANWYNDTYPLS	3	Soluble calcium-activated nucleotidase 1
K7EPV6	SLC44A2	134	1000	K.GVLMVGN*ETTYEDGHGSR.K	4.456	-0.66	962.933	2	GVLMVGNETTYED	1	Choline transporter-like protein 2 (Fragment)
M0QX44	SLC1A5	53	1000	R.SYSTTYEERN*ITGTR.V	1.865	1.25	594.28	3	TTYEERNITGTRV	2	Neutral amino acid transporter B(0) (Fragment)
O00451	GFRA2	357	9.296	R.NAIQAFGN*GTDVNVSPK.G	2.395	1.63	867.932	2	AIQAFGNGTDVNV	1	GDNF family receptor alpha-2 (GDNF receptor alpha-2) (GDNFR-alpha-2) (GFR-alpha-2) (GDNF receptor beta) (GDNFR-beta) (Neurturin receptor alpha) (NRTNR-alpha) (NTNR-alpha) (RET ligand 2) (TGF-beta-related neurotrophic factor receptor 2)
O14773	TPP1	443	1000	K.FLSSSPHLPPSSYFN*ASGR.A	3.313	1	1027.5	2	PPSSYFNASGRAY	3	Tripeptidyl-peptidase 1 (TPP-1) (EC 3.4.14.9) (Cell growth-inhibiting gene 1 protein) (Lysosomal pepstatin-insensitive protease) (LPIC) (Tripeptidyl aminopeptidase) (Tripeptidyl-peptidase I) (TPP-I)
O15031	PLXNB2	528	1000	K.SCVAVTSAQPQN*M^SR.R	2.66	-2.36	827.872	2	TSAQPQNMSRRAQ	4	Plexin-B2 (MM1)
O15031	PLXNB2	733	1000	K.LSHDAN*ETLPLHLYVK.S	2.654	0.6	618.328	3	KLSHDANETLPLH	5	Plexin-B2 (MM1)
O15031	PLXNB2	795	1000	R.CVYEALCN*TTSECPPPVITR.I	2.356	-0.68	790.693	3	VYEALCNTTSECP	1	Plexin-B2 (MM1)
O15031	PLXNB2	1049	1000	R.EAESLQPMTVVGTDYVFHN*DTK.V	2.426	0.35	828.721	3	TDYVFHNDTKVVF	4	Plexin-B2 (MM1)
O43157	PLXNB1	1253	1000	K.YTLDPN*ITSAGPTK.S	2.538	-0.72	740.874	2	KYTLDPNITSAGP	1	Plexin-B1 (Semaphorin receptor SEP)
O43462	MBTPS2	337	0	R.LDGSTECCNN*HSLTDVCFSYR.N	1.991	-1.11	846.678	3	STECCNNHSLTDV	1	Membrane-bound transcription factor site-2 protease (EC 3.4.24.85) (Endopeptidase S2P) (Sterol regulatory element-binding proteins intramembrane protease) (SREBPs intramembrane protease)
O43505	B3GNT1	204	57.711	R.VAQPGINYALGTN*VSYPNNLLR.N	3.967	1.2	1189.12	2	NYALGTNVSYPNN	2	N-acetyllactosaminide beta-1,3-N-acetylglucosaminyltransferase (EC 2.4.1.149) (I-beta-1,3-N-acetylglucosaminyltransferase) (iGnT) (Poly-N-acetyllactosamine extension enzyme) (UDP-GlcNAc:betaGal beta-1,3-N-acetylglucosaminyltransferase 1)
O43505	B3GNT1	300	104.939	K.NELVQLYQVGEVRPFYYGLCTPCQAPTN*YSR.W	5.407	0.61	1242.59	3	PCQAPTNYSRWVN	3	N-acetyllactosaminide beta-1,3-N-acetylglucosaminyltransferase (EC 2.4.1.149) (I-beta-1,3-N-acetylglucosaminyltransferase) (iGnT) (Poly-N-acetyllactosamine extension enzyme) (UDP-GlcNAc:betaGal beta-1,3-N-acetylglucosaminyltransferase 1)
O60512	B4GALT3	166	2.185	R.QQLAYGIYVIHQAGN*GTFNR.A	2.5	0.57	751.715	3	VIHQAGNGTFNRA	1	Beta-1,4-galactosyltransferase 3 (Beta-1,4-GalTase 3) (Beta4Gal-T3) (b4Gal-T3) (EC 2.4.1.-) (UDP-Gal:beta-GlcNAc beta-1,4-galactosyltransferase 3) (UDP-galactose:beta-N-acetylglucosamine beta-1,4-galactosyltransferase 3) [Includes: N-acetyllactosamine synthase (EC 2.4.1.90) (Nal synthase); Beta-N-acetylglucosaminylglycopeptide beta-1,4-galactosyltransferase (EC 2.4.1.38); Beta-N-acetylglucosaminy…
O75051	PLXNA2	76	1000	K.LTGN*LTIQVAHK.T	2.13	-0.07	433.25	3	VYKLTGNLTIQVA	1	Plexin-A2 (Semaphorin receptor OCT)
O75054	IGSF3	101	1000	R.VQGN*STLLHITDLQAR.D	3.546	0.05	884.976	2	IERVQGNSTLLHI	2	Immunoglobulin superfamily member 3 (IgSF3) (Glu-Trp-Ile EWI motif-containing protein 3) (EWI-3)
O75054	IGSF3	825	1000	R.LSQAQGN*LSVLETR.Q	3.303	-0.36	759.904	2	LSQAQGNLSVLET	2	Immunoglobulin superfamily member 3 (IgSF3) (Glu-Trp-Ile EWI motif-containing protein 3) (EWI-3)
O75054	IGSF3	842	1000	R.QVQLECVVLN*R.T	2.445	0.07	680.861	2	LECVVLNRTSITS	1	Immunoglobulin superfamily member 3 (IgSF3) (Glu-Trp-Ile EWI motif-containing protein 3) (EWI-3)
O75054	IGSF3	1077	1000	R.LTVLQASPQDTGN*YSCHVEEWLPSPQK.E	3.03	-1.75	1029.82	3	SPQDTGNYSCHVE	3	Immunoglobulin superfamily member 3 (IgSF3) (Glu-Trp-Ile EWI motif-containing protein 3) (EWI-3)
O75976	CPD	522	44.278	R.FANEYPN*ITR.L	2.519	-0.14	614.298	2	FANEYPNITRLYS	2	Carboxypeptidase D (EC 3.4.17.22) (Metallocarboxypeptidase D) (gp180)
O75976	CPD	955	13.378	R.GLVMNYPHITN*LTNLGQSTEYR.H	4.276	-0.06	842.084	3	NYPHITNLTNLGQ	3	Carboxypeptidase D (EC 3.4.17.22) (Metallocarboxypeptidase D) (gp180)
O75976	CPD	978	7.971	R.HIWSLEISNKPN*VSEPEEPK.I	4.56	-0.28	779.393	3	EISNKPNVSEPEE	5	Carboxypeptidase D (EC 3.4.17.22) (Metallocarboxypeptidase D) (gp180)
O75976	CPD	1142	4.545	K.HLASLYANNHPSMHMGQPSCPN*KSDENIPGGVMR.G	3.17	-0.18	750.744	5	GQPSCPNKSDENI	4	Carboxypeptidase D (EC 3.4.17.22) (Metallocarboxypeptidase D) (gp180)
P00451	F8	1461	0	K.NN*LSLAILTLEMTGDQREVGSLGTSATNSVTYKKVENTVLPKPDLPK.T	4.005	6.27	841.788	6	QGAKKNNLSLAIL	1	Coagulation factor VIII (Antihemophilic factor) (AHF) (Procoagulant component) [Cleaved into: Factor VIIIa heavy chain, 200 kDa isoform; Factor VIIIa heavy chain, 92 kDa isoform; Factor VIII B chain; Factor VIIIa light chain]
P01033	TIMP1	53	1000	K.FVGTPEVN*QTTLYQR.Y	2.991	-1.22	878.442	2	VGTPEVNQTTLYQ	2	Metalloproteinase inhibitor 1 (Erythroid-potentiating activity) (EPA) (Fibroblast collagenase inhibitor) (Collagenase inhibitor) (Tissue inhibitor of metalloproteinases 1) (TIMP-1)
P01892	HLA-A	110	1000	R.GYYN*QSEAGSHTVQR.M	2.199	-0.33	567.257	3	TLRGYYNQSEAGS	2	HLA class I histocompatibility antigen, A-2 alpha chain (MHC class I antigen A*2)
P04062	GBA	98	1000	R.RMELSMGPIQAN*HTGTGLLLTLQPEQK.F	3.874	0.75	989.516	3	MGPIQANHTGTGL	1	Glucosylceramidase (EC 3.2.1.45) (Acid beta-glucosidase) (Alglucerase) (Beta-glucocerebrosidase) (Beta-GC) (D-glucosyl-N-acylsphingosine glucohydrolase) (Imiglucerase)
P05556	ITGB1	212	71.753	R.NPCTSEQN*CTSPFSYK.N	4.402	1.48	961.894	2	PCTSEQNCTSPFS	8	Integrin beta-1 (Fibronectin receptor subunit beta) (Glycoprotein IIa) (GPIIA) (VLA-4 subunit beta) (CD antigen CD29)
P05556	ITGB1	481	1000	K.CHEGN*GTFECGACR.C	4.012	-1.4	829.304	2	PKCHEGNGTFECG	1	Integrin beta-1 (Fibronectin receptor subunit beta) (Glycoprotein IIa) (GPIIA) (VLA-4 subunit beta) (CD antigen CD29)
P05556	ITGB1	669	1000	K.KDTCTQECSYFN*ITK.V	3.423	0.33	633.278	3	QECSYFNITKVES	5	Integrin beta-1 (Fibronectin receptor subunit beta) (Glycoprotein IIa) (GPIIA) (VLA-4 subunit beta) (CD antigen CD29)
P06213	INSR	282	1000	R.CVN*FSFCQDLHHK.C	2.55	0.73	424.438	4	QDWRCVNFSFCQD	4	Insulin receptor (IR) (EC 2.7.10.1) (CD antigen CD220) [Cleaved into: Insulin receptor subunit alpha; Insulin receptor subunit beta]
P06213	INSR	445	1000	K.HN*LTITQGK.L	2.591	-0.51	507.777	2	WDWSKHNLTITQG	2	Insulin receptor (IR) (EC 2.7.10.1) (CD antigen CD220) [Cleaved into: Insulin receptor subunit alpha; Insulin receptor subunit beta]
P06213	INSR	698	1000	R.TWSPPFESEDSQKHN*QSEYEDSAGECCSCPK.T	3.147	1.16	920.617	4	EDSQKHNQSEYED	4	Insulin receptor (IR) (EC 2.7.10.1) (CD antigen CD220) [Cleaved into: Insulin receptor subunit alpha; Insulin receptor subunit beta]
P06213	INSR	920	1000	R.GLSPGN*YSVR.I	1.754	0.2	526.767	2	RGLSPGNYSVRIR	1	Insulin receptor (IR) (EC 2.7.10.1) (CD antigen CD220) [Cleaved into: Insulin receptor subunit alpha; Insulin receptor subunit beta]
P06756	ITGAV	74	1000	K.AN*TTQPGIVEGGQVLK.C	3.292	0.23	807.933	2	VGAPKANTTQPGI	1	Integrin alpha-V (Vitronectin receptor subunit alpha) (CD antigen CD51) [Cleaved into: Integrin alpha-V heavy chain; Integrin alpha-V light chain]
P08195	SLC3A2	365	91.9	R.DIENLKDASSFLAEWQN*ITK.G	5.033	1.7	1163.08	2	FLAEWQNITKGFS	2	4F2 cell-surface antigen heavy chain
P08195	SLC3A2	381	1000	R.LLIAGTN*SSDLQQILSLLESN*KDLLLTSSYLSDSGSTGEHTK.S	4.618	1.63	1485.76	3	LLIAGTNSSDLQQ	1	4F2 cell-surface antigen heavy chain
P08581	MET	149	1000	R.HVFPHN*HTADIQSEVHCIFSPQIEEPSQCPDCVVSALGAK.V	3.693	0.46	909.625	5	RHVFPHNHTADIQ	3	Hepatocyte growth factor receptor (HGF receptor) (EC 2.7.10.1) (HGF/SF receptor) (Proto-oncogene c-Met) (Scatter factor receptor) (SF receptor) (Tyrosine-protein kinase Met)
P08581	MET	202	8.594	R.FINFFVGNTIN*SSYFPDHPLHSISVR.R	3.533	-1.98	1004.5	3	FVGNTINSSYFPD	3	Hepatocyte growth factor receptor (HGF receptor) (EC 2.7.10.1) (HGF/SF receptor) (Proto-oncogene c-Met) (Scatter factor receptor) (SF receptor) (Tyrosine-protein kinase Met)
P08581	MET	399	25.238	R.CLQHFYGPNHEHCFN*R.T	4.315	0.16	530.478	4	NHEHCFNRTLLRN	1	Hepatocyte growth factor receptor (HGF receptor) (EC 2.7.10.1) (HGF/SF receptor) (Proto-oncogene c-Met) (Scatter factor receptor) (SF receptor) (Tyrosine-protein kinase Met)
P08648	ITGA5	182	1000	R.TEKEPLSDPVGTCYLSTDN*FTR.I	4.094	0.53	845.06	3	CYLSTDNFTRILE	5	Integrin alpha-5 (CD49 antigen-like family member E) (Fibronectin receptor subunit alpha) (Integrin alpha-F) (VLA-5) (CD antigen CD49e) [Cleaved into: Integrin alpha-5 heavy chain; Integrin alpha-5 light chain]
P08648	ITGA5	297	1000	K.GN*LTYGYVTILN*GSDIR.S	4.272	1.25	931.471	2	AGVPKGNLTYGYV	1	Integrin alpha-5 (CD49 antigen-like family member E) (Fibronectin receptor subunit alpha) (Integrin alpha-F) (VLA-5) (CD antigen CD49e) [Cleaved into: Integrin alpha-5 heavy chain; Integrin alpha-5 light chain]
P08648	ITGA5	307	1000	K.GN*LTYGYVTILN*GSDIR.S	4.272	1.25	931.471	2	GYVTILNGSDIRS	1	Integrin alpha-5 (CD49 antigen-like family member E) (Fibronectin receptor subunit alpha) (Integrin alpha-F) (VLA-5) (CD antigen CD49e) [Cleaved into: Integrin alpha-5 heavy chain; Integrin alpha-5 light chain]
P08648	ITGA5	675	30.835	K.NALN*LTFHAQNVGEGGAYEAELR.V	4.564	1.15	826.404	3	GDKNALNLTFHAQ	1	Integrin alpha-5 (CD49 antigen-like family member E) (Fibronectin receptor subunit alpha) (Integrin alpha-F) (VLA-5) (CD antigen CD49e) [Cleaved into: Integrin alpha-5 heavy chain; Integrin alpha-5 light chain]
P08648	ITGA5	712	1000	R.HPGN*FSSLSCDYFAVN*QSR.L	3.248	0.56	731.321	3	LVRHPGNFSSLSC	6	Integrin alpha-5 (CD49 antigen-like family member E) (Fibronectin receptor subunit alpha) (Integrin alpha-F) (VLA-5) (CD antigen CD49e) [Cleaved into: Integrin alpha-5 heavy chain; Integrin alpha-5 light chain]
P08648	ITGA5	724	1000	R.HPGN*FSSLSCDYFAVN*QSR.L	3.248	0.56	731.321	3	CDYFAVNQSRLLV	6	Integrin alpha-5 (CD49 antigen-like family member E) (Fibronectin receptor subunit alpha) (Integrin alpha-F) (VLA-5) (CD antigen CD49e) [Cleaved into: Integrin alpha-5 heavy chain; Integrin alpha-5 light chain]
P08648	ITGA5	773	24.437	K.NLN*NSQSDVVSFR.L	3.148	0.15	741.857	2	ILSKNLNNSQSDV	1	Integrin alpha-5 (CD49 antigen-like family member E) (Fibronectin receptor subunit alpha) (Integrin alpha-F) (VLA-5) (CD antigen CD49e) [Cleaved into: Integrin alpha-5 heavy chain; Integrin alpha-5 light chain]
P08648	ITGA5	868	31.275	R.VTGLN*CTTNHPINPK.G	2.955	0.15	834.917	2	TRVTGLNCTTNHP	2	Integrin alpha-5 (CD49 antigen-like family member E) (Fibronectin receptor subunit alpha) (Integrin alpha-F) (VLA-5) (CD antigen CD49e) [Cleaved into: Integrin alpha-5 heavy chain; Integrin alpha-5 light chain]
P11047	LAMC1	1395	75.738	R.KIPAIN*QTITEANEK.T	2.966	0.88	558.305	3	RKIPAINQTITEA	1	Laminin subunit gamma-1 (Laminin B2 chain) (Laminin-1 subunit gamma) (Laminin-10 subunit gamma) (Laminin-11 subunit gamma) (Laminin-2 subunit gamma) (Laminin-3 subunit gamma) (Laminin-4 subunit gamma) (Laminin-6 subunit gamma) (Laminin-7 subunit gamma) (Laminin-8 subunit gamma) (Laminin-9 subunit gamma) (S-laminin subunit gamma) (S-LAM gamma)
P11279	LAMP1	165	0	R.CVSGTQVHMNN*VTVTLHDATIQAYLSN*SSFSR.G	4.488	1.21	1181.89	3	TQVHMNNVTVTLH	1	Lysosome-associated membrane glycoprotein 1 (LAMP-1) (Lysosome-associated membrane protein 1) (CD107 antigen-like family member A) (CD antigen CD107a)
P11279	LAMP1	181	136.53	R.CVSGTQVHMNN*VTVTLHDATIQAYLSN*SSFSR.G	4.488	1.21	1181.89	3	IQAYLSNSSFSRG	1	Lysosome-associated membrane glycoprotein 1 (LAMP-1) (Lysosome-associated membrane protein 1) (CD107 antigen-like family member A) (CD antigen CD107a)
P11717	IGF2R	435	15.381	R.MSVINFECN*KTAGNDGK.G	2.119	0.41	629.954	3	VINFECNKTAGND	2	Cation-independent mannose-6-phosphate receptor (CI Man-6-P receptor) (CI-MPR) (M6PR) (300 kDa mannose 6-phosphate receptor) (MPR 300) (Insulin-like growth factor 2 receptor) (Insulin-like growth factor II receptor) (IGF-II receptor) (M6P/IGF2 receptor) (M6P/IGF2R) (CD antigen CD222)
P11717	IGF2R	581	1000	K.TN*ITLVCKPGDLESAPVLR.T	4.065	0.4	696.042	3	GKKIKTNITLVCK	2	Cation-independent mannose-6-phosphate receptor (CI Man-6-P receptor) (CI-MPR) (M6PR) (300 kDa mannose 6-phosphate receptor) (MPR 300) (Insulin-like growth factor 2 receptor) (Insulin-like growth factor II receptor) (IGF-II receptor) (M6P/IGF2 receptor) (M6P/IGF2R) (CD antigen CD222)
P11717	IGF2R	1246	69.812	R.HGNLYDLKPLGLN*DTIVSAGEYTYYFR.V	5.526	2.43	1041.52	3	LKPLGLNDTIVSA	2	Cation-independent mannose-6-phosphate receptor (CI Man-6-P receptor) (CI-MPR) (M6PR) (300 kDa mannose 6-phosphate receptor) (MPR 300) (Insulin-like growth factor 2 receptor) (Insulin-like growth factor II receptor) (IGF-II receptor) (M6P/IGF2 receptor) (M6P/IGF2R) (CD antigen CD222)
P11717	IGF2R	1757	9.968	R.VAGPPILNPIANEIYLNFESSTPCLADKHFN*YTSLIAFHCK.R	3.942	-0.8	933.866	5	LADKHFNYTSLIA	4	Cation-independent mannose-6-phosphate receptor (CI Man-6-P receptor) (CI-MPR) (M6PR) (300 kDa mannose 6-phosphate receptor) (MPR 300) (Insulin-like growth factor 2 receptor) (Insulin-like growth factor II receptor) (IGF-II receptor) (M6P/IGF2 receptor) (M6P/IGF2R) (CD antigen CD222)
P11717	IGF2R	2136	9.394	R.AACAVKPQEVQM^VN*GTITNPINGK.S	3.573	-1.37	853.763	3	QEVQMVNGTITNP	4	Cation-independent mannose-6-phosphate receptor (CI Man-6-P receptor) (CI-MPR) (M6PR) (300 kDa mannose 6-phosphate receptor) (MPR 300) (Insulin-like growth factor 2 receptor) (Insulin-like growth factor II receptor) (IGF-II receptor) (M6P/IGF2 receptor) (M6P/IGF2R) (CD antigen CD222)
P13473	LAMP2	49	1000	K.WQM^N*FTVR.Y	1.687	-0.34	550.757	2	YAKWQMNFTVRYE	2	Lysosome-associated membrane glycoprotein 2 (LAMP-2) (Lysosome-associated membrane protein 2) (CD107 antigen-like family member B) (CD antigen CD107b)
P13612	ITGA4	645	1000	K.IGFLKPHEN*K.T	2.492	-0.04	593.329	2	FLKPHENKTYLAV	3	Integrin alpha-4 (CD49 antigen-like family member D) (Integrin alpha-IV) (VLA-4 subunit alpha) (CD antigen CD49d)
P15529	CD46	83	1000	K.KGYFYIPPLATHTICDRN*HTWLPVSDDACYR.E	3.018	0.22	754.761	5	HTICDRNHTWLPV	2	Membrane cofactor protein (TLX) (Trophoblast leukocyte common antigen) (CD antigen CD46)
P17035	ZNF28	638	14.518	K.CN*ECGKTFSQM^SSLVYHHRLHSGEKPYKCNECGK.V	2.995	-0.43	1383.28	3	EKPYKCNECGKTF	1	Zinc finger protein 28 (Zinc finger protein KOX24)
P17301	ITGA2	1057	1000	R.TASCSN*VTCWLK.D	1.762	0.39	715.321	2	RTASCSNVTCWLK	2	Integrin alpha-2 (CD49 antigen-like family member B) (Collagen receptor) (Platelet membrane glycoprotein Ia) (GPIa) (VLA-2 subunit alpha) (CD antigen CD49b)
P22413	ENPP1	731	24.437	K.CSFYKN*NTK.V	2.139	1.07	582.766	2	KCSFYKNNTKVSY	1	Ectonucleotide pyrophosphatase/phosphodiesterase family member 1 (E-NPP 1) (Membrane component chromosome 6 surface marker 1) (Phosphodiesterase I/nucleotide pyrophosphatase 1) (Plasma-cell membrane glycoprotein PC-1) [Includes: Alkaline phosphodiesterase I (EC 3.1.4.1); Nucleotide pyrophosphatase (NPPase) (EC 3.6.1.9)]
P23229	ITGA6	770	0	K.QLSCVAN*QNGSQADCELGNPFKR.N	3.072	1.64	1298.59	2	SCVANQNGSQADC	4	Integrin alpha-6 (CD49 antigen-like family member F) (VLA-6) (CD antigen CD49f) [Cleaved into: Integrin alpha-6 heavy chain; Integrin alpha-6 light chain]
P23470	PTPRG	156	1000	K.VEFHWGHSN*GSAGSEHSIN*GR.R	4.274	-1.79	757.668	3	FHWGHSNGSAGSE	1	Receptor-type tyrosine-protein phosphatase gamma (Protein-tyrosine phosphatase gamma) (R-PTP-gamma) (EC 3.1.3.48)
P23470	PTPRG	166	1000	K.VEFHWGHSN*GSAGSEHSIN*GR.R	4.274	-1.79	757.668	3	GSEHSINGRRFPV	1	Receptor-type tyrosine-protein phosphatase gamma (Protein-tyrosine phosphatase gamma) (R-PTP-gamma) (EC 3.1.3.48)
P25942	CD40	180	1000	K.DLVVQQAGTN*KTDVVCGPQDR.L	5.315	1.8	768.379	3	VQQAGTNKTDVVC	1	Tumor necrosis factor receptor superfamily member 5 (B-cell surface antigen CD40) (Bp50) (CD40L receptor) (CDw40) (CD antigen CD40)
P30450	HLA-A	110	1000	R.GYYN*QSEDGSHTIQR.M	3.55	-11.63	879.374	2	TLRGYYNQSEDGS	2	HLA class I histocompatibility antigen, A-26 alpha chain (MHC class I antigen A*26)
P30825	SLC7A1	226	131.654	K.NWQLTEEDFGN*TSGR.L	4.06	0.35	878.887	2	TEEDFGNTSGRLC	2	High affinity cationic amino acid transporter 1 (CAT-1) (CAT1) (Ecotropic retroviral leukemia receptor homolog) (Ecotropic retrovirus receptor homolog) (ERR) (Solute carrier family 7 member 1) (System Y+ basic amino acid transporter)
P30825	SLC7A1	235	0	R.LCLNN*DTK.E	2.006	-0.44	490.734	2	GRLCLNNDTKEGK	1	High affinity cationic amino acid transporter 1 (CAT-1) (CAT1) (Ecotropic retroviral leukemia receptor homolog) (Ecotropic retrovirus receptor homolog) (ERR) (Solute carrier family 7 member 1) (System Y+ basic amino acid transporter)
P43121	MCAM	56	1000	K.CGLSQSQGN*LSHVDWFSVHK.E	4.895	1.49	1145.04	2	LSQSQGNLSHVDW	1	Cell surface glycoprotein MUC18 (Cell surface glycoprotein P1H12) (Melanoma cell adhesion molecule) (Melanoma-associated antigen A32) (Melanoma-associated antigen MUC18) (S-endo 1 endothelial-associated antigen) (CD antigen CD146)
P48960	CD97	371	1000	R.GDKN*VTMGQSSAR.M	2.514	-0.14	451.882	3	QERGDKNVTMGQS	6	CD97 antigen (Leukocyte antigen CD97) (CD antigen CD97) [Cleaved into: CD97 antigen subunit alpha; CD97 antigen subunit beta]
P48960	CD97	453	24.437	R.LSAVNSIFLSHN*NTK.E	3.947	0.14	824.433	2	SIFLSHNNTKELN	1	CD97 antigen (Leukocyte antigen CD97) (CD antigen CD97) [Cleaved into: CD97 antigen subunit alpha; CD97 antigen subunit beta]
P50443	SLC26A2	357	0	K.LHENYN*SSIAGHIPTGFMPPK.V	3.277	-0.45	771.712	3	KLHENYNSSIAGH	2	Sulfate transporter (Diastrophic dysplasia protein) (Solute carrier family 26 member 2)
P50895	BCAM	377	1000	K.VLSLPLN*SSAVVN*CSVHGLPTPALR.W	2.958	0.11	869.803	3	VLSLPLNSSAVVN	1	Basal cell adhesion molecule (Auberger B antigen) (B-CAM cell surface glycoprotein) (F8/G253 antigen) (Lutheran antigen) (Lutheran blood group glycoprotein) (CD antigen CD239)
P50895	BCAM	383	1000	K.VLSLPLN*SSAVVN*CSVHGLPTPALR.W	2.958	0.11	869.803	3	NSSAVVNCSVHGL	1	Basal cell adhesion molecule (Auberger B antigen) (B-CAM cell surface glycoprotein) (F8/G253 antigen) (Lutheran antigen) (Lutheran blood group glycoprotein) (CD antigen CD239)
P51805	PLXNA3	1009	1000	R.AN*ISSPGLIYTYTQDPTVTR.L	3.063	4.69	1100.56	2	LAIDRANISSPGL	1	Plexin-A3 (Plexin-4) (Semaphorin receptor SEX)
P53708	ITGA8	737	93.154	R.MVVCDLGNPMVSGTN*YSLGLR.F	4.423	0.01	1143.54	2	PMVSGTNYSLGLR	1	Integrin alpha-8 [Cleaved into: Integrin alpha-8 heavy chain; Integrin alpha-8 light chain]
P54289	CACNA2D1	781	68.033	R.SLDNDNYVFTAPYFN*K.S	3.636	-1.16	955.937	2	FTAPYFNKSGPGA	2	Voltage-dependent calcium channel subunit alpha-2/delta-1 (Voltage-gated calcium channel subunit alpha-2/delta-1) [Cleaved into: Voltage-dependent calcium channel subunit alpha-2-1; Voltage-dependent calcium channel subunit delta-1]
P54709	ATP1B3	240	6.591	K.KLHVGYLQPLVAVQVSFAPN*NTGK.E	3.955	0.14	646.61	4	QVSFAPNNTGKEV	5	Sodium/potassium-transporting ATPase subunit beta-3 (Sodium/potassium-dependent ATPase subunit beta-3) (ATPB-3) (CD antigen CD298)
P54760	EPHB4	335	1000	R.LN*GSSLHLEWSAPLESGGR.E	3.646	-3.58	1007	2	SVVSRLNGSSLHL	1	Ephrin type-B receptor 4 (EC 2.7.10.1) (Hepatoma transmembrane kinase) (Tyrosine-protein kinase TYRO11)
P56199	ITGA1	217	6.591	K.QTQVGIVQYGEN*VTHEFNLNK.Y	2.113	-0.26	807.736	3	IVQYGENVTHEFN	1	Integrin alpha-1 (CD49 antigen-like family member A) (Laminin and collagen receptor) (VLA-1) (CD antigen CD49a)
P56199	ITGA1	532	1000	K.VYVYALN*QTR.F	2.53	0.01	615.324	2	VYVYALNQTRFEY	1	Integrin alpha-1 (CD49 antigen-like family member A) (Laminin and collagen receptor) (VLA-1) (CD antigen CD49a)
P56199	ITGA1	840	18.805	R.SQNDKFN*VSLTVK.N	2.785	0.08	494.928	3	SQNDKFNVSLTVK	2	Integrin alpha-1 (CD49 antigen-like family member A) (Laminin and collagen receptor) (VLA-1) (CD antigen CD49a)
P61565	HERV-K_12q14	99	8.88	K.YLENTKVTQTPESMLLAALMIVSM^VVSLPM^PAGAAAAN*YTNWAYVPFPPLIR.A	2.827	-7.21	813.129	7	AGAAAANYTNWAY	1	HERV-K_12q14.1 provirus ancestral Env polyprotein (EnvK1 protein) (Envelope polyprotein) [Cleaved into: Surface protein (SU); Transmembrane protein (TM)]
P78310	CXADR	106	13.38	K.SGDASIN*VTNLQLSDIGTYQCK.V	3.812	1.25	1194.07	2	SGDASINVTNLQL	6	Coxsackievirus and adenovirus receptor (CAR) (hCAR) (CVB3-binding protein) (Coxsackievirus B-adenovirus receptor) (HCVADR)
P78310	CXADR	201	1000	K.N*ASSEYSGTYSCTVR.N	3.693	-1.19	842.853	2	SVISVKNASSEYS	3	Coxsackievirus and adenovirus receptor (CAR) (hCAR) (CVB3-binding protein) (Coxsackievirus B-adenovirus receptor) (HCVADR)
P78324	SIRPA	110	1000	R.IGN*ITPADAGTYYCVK.F	3.028	-0.29	873.418	2	FSIRIGNITPADA	1	Tyrosine-protein phosphatase non-receptor type substrate 1 (SHP substrate 1) (SHPS-1) (Brain Ig-like molecule with tyrosine-based activation motifs) (Bit) (CD172 antigen-like family member A) (Inhibitory receptor SHPS-1) (Macrophage fusion receptor) (MyD-1 antigen) (Signal-regulatory protein alpha-1) (Sirp-alpha-1) (Signal-regulatory protein alpha-2) (Sirp-alpha-2) (Signal-regulatory protein alph…
P78347	GTF2I	708	15.007	R.TPTQTN*GSNVPFKPR.G	3.277	-0.78	549.617	3	RTPTQTNGSNVPF	1	General transcription factor II-I (GTFII-I) (TFII-I) (Bruton tyrosine kinase-associated protein 135) (BAP-135) (BTK-associated protein 135) (SRF-Phox1-interacting protein) (SPIN) (Williams-Beuren syndrome chromosomal region 6 protein)
P98172	EFNB1	139	84.498	K.HHDYYITSTSN*GSLEGLENR.E	3.916	0.25	766.017	3	YITSTSNGSLEGL	5	Ephrin-B1 (EFL-3) (ELK ligand) (ELK-L) (EPH-related receptor tyrosine kinase ligand 2) (LERK-2)
Q02487	DSC2	392	1000	R.AN*YTILK.G	2.777	0.24	413.234	2	TANWRANYTILKG	1	Desmocollin-2 (Cadherin family member 2) (Desmocollin-3) (Desmosomal glycoprotein II) (Desmosomal glycoprotein III)
Q04721	NOTCH2	46	23.012	R.DGYEPCVNEGMCVTYHN*GTGYCK.C	1.74	0.02	905.355	3	MCVTYHNGTGYCK	1	Neurogenic locus notch homolog protein 2 (Notch 2) (hN2) [Cleaved into: Notch 2 extracellular truncation; Notch 2 intracellular domain]
Q07075	ENPEP	324	1000	K.HTAEYAAN*ITK.S	2.149	0.64	611.304	2	TAEYAANITKSVF	1	Glutamyl aminopeptidase (EAP) (EC 3.4.11.7) (Aminopeptidase A) (AP-A) (Differentiation antigen gp160) (CD antigen CD249)
Q07954	LRP1	136	1000	R.LGCQHHCVPTLDGPTCYCN*SSFQLQADGK.T	2.989	-0.09	839.114	4	GPTCYCNSSFQLQ	3	Prolow-density lipoprotein receptor-related protein 1 (LRP-1) (Alpha-2-macroglobulin receptor) (A2MR) (Apolipoprotein E receptor) (APOER) (CD antigen CD91) [Cleaved into: Low-density lipoprotein receptor-related protein 1 85 kDa subunit (LRP-85); Low-density lipoprotein receptor-related protein 1 515 kDa subunit (LRP-515); Low-density lipoprotein receptor-related protein 1 intracellular domain (L…
Q07954	LRP1	729	1000	R.IETILLN*GTDRK.I	2.935	-0.36	688.387	2	IETILLNGTDRKI	1	Prolow-density lipoprotein receptor-related protein 1 (LRP-1) (Alpha-2-macroglobulin receptor) (A2MR) (Apolipoprotein E receptor) (APOER) (CD antigen CD91) [Cleaved into: Low-density lipoprotein receptor-related protein 1 85 kDa subunit (LRP-85); Low-density lipoprotein receptor-related protein 1 515 kDa subunit (LRP-515); Low-density lipoprotein receptor-related protein 1 intracellular domain (L…
Q07954	LRP1	1511	1000	K.WTGHN*VTVVQR.T	2.953	0.31	433.895	3	NKWTGHNVTVVQR	1	Prolow-density lipoprotein receptor-related protein 1 (LRP-1) (Alpha-2-macroglobulin receptor) (A2MR) (Apolipoprotein E receptor) (APOER) (CD antigen CD91) [Cleaved into: Low-density lipoprotein receptor-related protein 1 85 kDa subunit (LRP-85); Low-density lipoprotein receptor-related protein 1 515 kDa subunit (LRP-515); Low-density lipoprotein receptor-related protein 1 intracellular domain (L…
Q07954	LRP1	1575	1000	K.LHKDN*TTCYEFKK.F	3.077	6.66	422.459	4	MKLHKDNTTCYEF	1	Prolow-density lipoprotein receptor-related protein 1 (LRP-1) (Alpha-2-macroglobulin receptor) (A2MR) (Apolipoprotein E receptor) (APOER) (CD antigen CD91) [Cleaved into: Low-density lipoprotein receptor-related protein 1 85 kDa subunit (LRP-85); Low-density lipoprotein receptor-related protein 1 515 kDa subunit (LRP-515); Low-density lipoprotein receptor-related protein 1 intracellular domain (L…
Q07954	LRP1	2127	1000	R.GSKDN*ATDSVPLR.T	2.553	0.26	681.841	2	KRGSKDNATDSVP	2	Prolow-density lipoprotein receptor-related protein 1 (LRP-1) (Alpha-2-macroglobulin receptor) (A2MR) (Apolipoprotein E receptor) (APOER) (CD antigen CD91) [Cleaved into: Low-density lipoprotein receptor-related protein 1 85 kDa subunit (LRP-85); Low-density lipoprotein receptor-related protein 1 515 kDa subunit (LRP-515); Low-density lipoprotein receptor-related protein 1 intracellular domain (L…
Q07954	LRP1	2502	48.371	R.INNGGCQDLCLLTHQGHVN*CSCR.G	3.183	1.05	679.798	4	THQGHVNCSCRGG	2	Prolow-density lipoprotein receptor-related protein 1 (LRP-1) (Alpha-2-macroglobulin receptor) (A2MR) (Apolipoprotein E receptor) (APOER) (CD antigen CD91) [Cleaved into: Low-density lipoprotein receptor-related protein 1 85 kDa subunit (LRP-85); Low-density lipoprotein receptor-related protein 1 515 kDa subunit (LRP-515); Low-density lipoprotein receptor-related protein 1 intracellular domain (L…
Q07954	LRP1	2905	1000	K.CN*ASSQFLCSSGR.C	3.881	-0.42	738.808	2	SQEHKCNASSQFL	2	Prolow-density lipoprotein receptor-related protein 1 (LRP-1) (Alpha-2-macroglobulin receptor) (A2MR) (Apolipoprotein E receptor) (APOER) (CD antigen CD91) [Cleaved into: Low-density lipoprotein receptor-related protein 1 85 kDa subunit (LRP-85); Low-density lipoprotein receptor-related protein 1 515 kDa subunit (LRP-515); Low-density lipoprotein receptor-related protein 1 intracellular domain (L…
Q07954	LRP1	3089	0	R.MHLN*GSNVQVLHR.T	3.008	-0.4	503.261	3	IRRMHLNGSNVQV	2	Prolow-density lipoprotein receptor-related protein 1 (LRP-1) (Alpha-2-macroglobulin receptor) (A2MR) (Apolipoprotein E receptor) (APOER) (CD antigen CD91) [Cleaved into: Low-density lipoprotein receptor-related protein 1 85 kDa subunit (LRP-85); Low-density lipoprotein receptor-related protein 1 515 kDa subunit (LRP-515); Low-density lipoprotein receptor-related protein 1 intracellular domain (L…
Q07954	LRP1	3333	1000	R.TCVSN*CTASQFVCK.N	2.723	-0.58	832.851	2	GRTCVSNCTASQF	4	Prolow-density lipoprotein receptor-related protein 1 (LRP-1) (Alpha-2-macroglobulin receptor) (A2MR) (Apolipoprotein E receptor) (APOER) (CD antigen CD91) [Cleaved into: Low-density lipoprotein receptor-related protein 1 85 kDa subunit (LRP-85); Low-density lipoprotein receptor-related protein 1 515 kDa subunit (LRP-515); Low-density lipoprotein receptor-related protein 1 intracellular domain (L…
Q07954	LRP1	3788	1000	K.LTSCATN*ASICGDEAR.C	4.556	0.4	864.875	2	LTSCATNASICGD	1	Prolow-density lipoprotein receptor-related protein 1 (LRP-1) (Alpha-2-macroglobulin receptor) (A2MR) (Apolipoprotein E receptor) (APOER) (CD antigen CD91) [Cleaved into: Low-density lipoprotein receptor-related protein 1 85 kDa subunit (LRP-85); Low-density lipoprotein receptor-related protein 1 515 kDa subunit (LRP-515); Low-density lipoprotein receptor-related protein 1 intracellular domain (L…
Q07954	LRP1	3839	24.437	R.FGTCSQLCN*NTK.G	3.292	-0.71	716.807	2	TCSQLCNNTKGGH	1	Prolow-density lipoprotein receptor-related protein 1 (LRP-1) (Alpha-2-macroglobulin receptor) (A2MR) (Apolipoprotein E receptor) (APOER) (CD antigen CD91) [Cleaved into: Low-density lipoprotein receptor-related protein 1 85 kDa subunit (LRP-85); Low-density lipoprotein receptor-related protein 1 515 kDa subunit (LRP-515); Low-density lipoprotein receptor-related protein 1 intracellular domain (L…
Q07954	LRP1	3953	1000	R.GVTHLN*ISGLK.M	2.076	-0.03	381.22	3	RGVTHLNISGLKM	1	Prolow-density lipoprotein receptor-related protein 1 (LRP-1) (Alpha-2-macroglobulin receptor) (A2MR) (Apolipoprotein E receptor) (APOER) (CD antigen CD91) [Cleaved into: Low-density lipoprotein receptor-related protein 1 85 kDa subunit (LRP-85); Low-density lipoprotein receptor-related protein 1 515 kDa subunit (LRP-515); Low-density lipoprotein receptor-related protein 1 intracellular domain (L…
Q07954	LRP1	4125	1000	K.FGHSPLVN*LTGGLSHASDVVLYHQHK.Q	3.075	0.49	564.093	5	GHSPLVNLTGGLS	4	Prolow-density lipoprotein receptor-related protein 1 (LRP-1) (Alpha-2-macroglobulin receptor) (A2MR) (Apolipoprotein E receptor) (APOER) (CD antigen CD91) [Cleaved into: Low-density lipoprotein receptor-related protein 1 85 kDa subunit (LRP-85); Low-density lipoprotein receptor-related protein 1 515 kDa subunit (LRP-515); Low-density lipoprotein receptor-related protein 1 intracellular domain (L…
Q07954	LRP1	4279	6.591	K.CTQQVCAGYCANN*STCTVNQGNQPQCR.C	5.33	1.57	1060.43	3	AGYCANNSTCTVN	1	Prolow-density lipoprotein receptor-related protein 1 (LRP-1) (Alpha-2-macroglobulin receptor) (A2MR) (Apolipoprotein E receptor) (APOER) (CD antigen CD91) [Cleaved into: Low-density lipoprotein receptor-related protein 1 85 kDa subunit (LRP-85); Low-density lipoprotein receptor-related protein 1 515 kDa subunit (LRP-515); Low-density lipoprotein receptor-related protein 1 intracellular domain (L…
Q08722	CD47	73	1000	K.GRDIYTFDGALN*K.S	3.571	0.58	736.867	2	TFDGALNKSTVPT	1	Leukocyte surface antigen CD47 (Antigenic surface determinant protein OA3) (Integrin-associated protein) (IAP) (Protein MER6) (CD antigen CD47)
Q08722	CD47	111	1000	K.SDAVSHTGN*YTCEVTELTR.E	4.447	-3.82	1071.97	2	AVSHTGNYTCEVT	10	Leukocyte surface antigen CD47 (Antigenic surface determinant protein OA3) (Integrin-associated protein) (IAP) (Protein MER6) (CD antigen CD47)
Q12860	CNTN1	494	1000	R.GKAN*STGTLVITDPTR.I	3.61	1.37	817.437	2	NNRGKANSTGTLV	1	Contactin-1 (Glycoprotein gp135) (Neural cell surface protein F3)
Q12913	PTPRJ	824	8.463	R.NTCTTGITDPPPPDGSPN*ITSVSHNSVK.V	3.99	-1.28	966.121	3	PPDGSPNITSVSH	2	Receptor-type tyrosine-protein phosphatase eta (Protein-tyrosine phosphatase eta) (R-PTP-eta) (EC 3.1.3.48) (Density-enhanced phosphatase 1) (DEP-1) (HPTP eta) (Protein-tyrosine phosphatase receptor type J) (R-PTP-J) (CD antigen CD148)
Q13308	PTK7	175	1000	R.DGTPLSDGQSN*HTVSSK.E	3.22	-0.37	866.897	2	LSDGQSNHTVSSK	1	Inactive tyrosine-protein kinase 7 (Colon carcinoma kinase 4) (CCK-4) (Protein-tyrosine kinase 7) (Pseudo tyrosine kinase receptor 7) (Tyrosine-protein kinase-like 7)
Q13308	PTK7	646	1000	R.MHIFQN*GSLVIHDVAPEDSGR.Y	2.633	0.22	775.711	3	RMHIFQNGSLVIH	7	Inactive tyrosine-protein kinase 7 (Colon carcinoma kinase 4) (CCK-4) (Protein-tyrosine kinase 7) (Pseudo tyrosine kinase receptor 7) (Tyrosine-protein kinase-like 7)
Q13433	SLC39A6	67	6.591	R.YGEN*NSLSVEGFRK.L	2.431	0.17	534.926	3	FYRYGENNSLSVE	2	Zinc transporter ZIP6 (Estrogen-regulated protein LIV-1) (Solute carrier family 39 member 6) (Zrt- and Irt-like protein 6) (ZIP-6)
Q13433	SLC39A6	266	71.753	R.NTNENPQECFN*ASK.L	3.052	7.47	828.352	2	NPQECFNASKLLT	2	Zinc transporter ZIP6 (Estrogen-regulated protein LIV-1) (Solute carrier family 39 member 6) (Zrt- and Irt-like protein 6) (ZIP-6)
Q13433	SLC39A6	283	16.964	K.LLTSHGMGIQVPLN*ATEFNYLCPAIINQIDAR.S	4.323	1.13	1191.61	3	GIQVPLNATEFNY	2	Zinc transporter ZIP6 (Estrogen-regulated protein LIV-1) (Solute carrier family 39 member 6) (Zrt- and Irt-like protein 6) (ZIP-6)
Q13641	TPBG	256	86.344	R.N*LTHLESLHLEDNALK.V	3.224	-0.61	617.322	3	TYVSFRNLTHLES	1	Trophoblast glycoprotein (5T4 oncofetal antigen) (5T4 oncofetal trophoblast glycoprotein) (5T4 oncotrophoblast glycoprotein) (M6P1)
Q13641	TPBG	275	1000	K.VLHN*GTLAELQGLPHIR.V	3.083	-0.22	624.351	3	ALKVLHNGTLAEL	2	Trophoblast glycoprotein (5T4 oncofetal antigen) (5T4 oncofetal trophoblast glycoprotein) (5T4 oncotrophoblast glycoprotein) (M6P1)
Q14108	SCARB2	105	61.28	K.ANIQFGDN*GTTISAVSNK.A	4.35	0.09	920.452	2	NIQFGDNGTTISA	3	Lysosome membrane protein 2 (85 kDa lysosomal membrane sialoglycoprotein) (LGP85) (CD36 antigen-like 2) (Lysosome membrane protein II) (LIMP II) (Scavenger receptor class B member 2) (CD antigen CD36)
Q14118	DAG1	641	1000	K.LAFAFGDRN*CSTITLQN*ITR.G	2.902	-0.23	768.719	3	FAFGDRNCSTITL	1	Dystroglycan (Dystrophin-associated glycoprotein 1) [Cleaved into: Alpha-dystroglycan (Alpha-DG); Beta-dystroglycan (Beta-DG)]
Q14118	DAG1	649	1000	K.LAFAFGDRN*CSTITLQN*ITR.G	2.902	-0.23	768.719	3	STITLQNITRGSI	1	Dystroglycan (Dystrophin-associated glycoprotein 1) [Cleaved into: Alpha-dystroglycan (Alpha-DG); Beta-dystroglycan (Beta-DG)]
Q14126	DSG2	462	1000	R.YVQN*GTYTVK.I	2.186	0.43	588.295	2	ESRYVQNGTYTVK	2	Desmoglein-2 (Cadherin family member 5) (HDGC)
Q15223	PVRL1	202	19.843	R.NPN*GTVTVISR.Y	2.214	0.37	580.812	2	QEIRNPNGTVTVI	1	Poliovirus receptor-related protein 1 (Herpes virus entry mediator C) (Herpesvirus entry mediator C) (HveC) (Herpesvirus Ig-like receptor) (HIgR) (Nectin-1) (CD antigen CD111)
Q15223	PVRL1	286	40.767	K.ADANPPATEYHWTTLN*GSLPK.G	2.217	0.05	762.702	3	YHWTTLNGSLPKG	1	Poliovirus receptor-related protein 1 (Herpes virus entry mediator C) (Herpesvirus entry mediator C) (HveC) (Herpesvirus Ig-like receptor) (HIgR) (Nectin-1) (CD antigen CD111)
Q16602	CALCRL	123	51.004	R.TWTN*YTQCNVNTHEK.V	3.81	-0.84	949.914	2	SNRTWTNYTQCNV	1	Calcitonin gene-related peptide type 1 receptor (CGRP type 1 receptor) (Calcitonin receptor-like receptor)
Q16706	MAN2A1	1125	28.529	K.FIVESLTPSSLSLMHSPPGTQN*ISEINLSPMEISTFR.I	4.39	2.2	1355.02	3	SPPGTQNISEINL	1	Alpha-mannosidase 2 (EC 3.2.1.114) (Golgi alpha-mannosidase II) (AMan II) (Man II) (Mannosidase alpha class 2A member 1) (Mannosyl-oligosaccharide 1,3-1,6-alpha-mannosidase)
Q3T906	GNPTAB	376	1000	R.N*LSHLPTFSSPAIESHIHR.I	2.732	3.42	537.28	4	HQDVFRNLSHLPT	1	N-acetylglucosamine-1-phosphotransferase subunits alpha/beta (EC 2.7.8.17) (GlcNAc-1-phosphotransferase subunits alpha/beta) (Stealth protein GNPTAB) (UDP-N-acetylglucosamine-1-phosphotransferase subunits alpha/beta) [Cleaved into: N-acetylglucosamine-1-phosphotransferase subunit alpha; N-acetylglucosamine-1-phosphotransferase subunit beta]
Q3T906	GNPTAB	551	1000	K.VILLPN*QTHYIIPK.G	2.312	1.28	826.488	2	KVILLPNQTHYII	2	N-acetylglucosamine-1-phosphotransferase subunits alpha/beta (EC 2.7.8.17) (GlcNAc-1-phosphotransferase subunits alpha/beta) (Stealth protein GNPTAB) (UDP-N-acetylglucosamine-1-phosphotransferase subunits alpha/beta) [Cleaved into: N-acetylglucosamine-1-phosphotransferase subunit alpha; N-acetylglucosamine-1-phosphotransferase subunit beta]
Q4KMQ2	ANO6	802	42.565	K.GNPYSDLGN*HTTCR.Y	2.837	1.63	797.845	2	PYSDLGNHTTCRY	3	Anoctamin-6 (Small-conductance calcium-activated nonselective cation channel) (SCAN channel) (Transmembrane protein 16F)
Q58EX2	SDK2	609	57.347	R.AIN*LTWTKPFDGNSPLIR.Y	2.806	0.47	682.702	3	VERRAINLTWTKP	3	Protein sidekick-2
Q58EX2	SDK2	704	1000	R.TN*QSIMIQWQPPPESHQN*GILK.G	2.96	0.86	851.425	3	IASGRTNQSIMIQ	3	Protein sidekick-2
Q58EX2	SDK2	720	1000	R.TN*QSIMIQWQPPPESHQN*GILK.G	2.96	0.86	851.425	3	PPESHQNGILKGY	3	Protein sidekick-2
Q58EX2	SDK2	804	3.494	K.VTEWTLQGVPTVPPGNVHAEATN*STTIR.F	3.51	0.78	993.509	3	VHAEATNSTTIRF	4	Protein sidekick-2
Q5KU26	COLEC12	271	24.437	K.VQSLQTLAAN*NSALAK.A	3.865	0.54	816.447	2	LQTLAANNSALAK	1	Collectin-12 (Collectin placenta protein 1) (CL-P1) (hCL-P1) (Nurse cell scavenger receptor 2) (Scavenger receptor class A member 4) (Scavenger receptor with C-type lectin)
Q5KU26	COLEC12	349	34.089	R.FQLFETDIVNIISN*ISYTAHHLR.T	3.662	1.25	684.358	4	IVNIISNISYTAH	2	Collectin-12 (Collectin placenta protein 1) (CL-P1) (hCL-P1) (Nurse cell scavenger receptor 2) (Scavenger receptor class A member 4) (Scavenger receptor with C-type lectin)
Q5KU26	COLEC12	386	24.437	K.HTDDLTSLN*NTLANIR.L	4.186	0.63	900.953	2	DDLTSLNNTLANI	1	Collectin-12 (Collectin placenta protein 1) (CL-P1) (hCL-P1) (Nurse cell scavenger receptor 2) (Scavenger receptor class A member 4) (Scavenger receptor with C-type lectin)
Q5T0Y8	SMPDL3B	194	27.149	K.NQFPAGSNNIYNQIAELWKPWLSN*ESIALFK.K	3.876	1.48	1199.28	3	WKPWLSNESIALF	2	Acid sphingomyelinase-like phosphodiesterase 3b (Fragment)
Q5TB53	TM9SF3	130	1000	R.IVDVN*LTSEGK.V	3.116	0.78	589.314	2	NRIVDVNLTSEGK	2	Transmembrane 9 superfamily member 3 (Fragment)
Q5VT82	PCDH9	306	24.437	R.LFALN*NTTGLITVQR.S	2.447	0.89	832.468	2	KRLFALNNTTGLI	2	Protocadherin 9 (Protocadherin-9)
Q5VT82	PCDH9	450	1000	K.IVASDSGKPSLN*QTALVR.V	3.427	-0.09	620.342	3	SGKPSLNQTALVR	2	Protocadherin 9 (Protocadherin-9)
Q5VT82	PCDH9	734	1000	R.IDPVTGN*ITLEEKPAPTDVGLHR.L	2.612	0.33	825.771	3	IDPVTGNITLEEK	1	Protocadherin 9 (Protocadherin-9)
Q5VT82	PCDH9	754	1000	R.LVVN*ISDLGYPK.S	2.587	-1.32	660.868	2	LHRLVVNISDLGY	1	Protocadherin 9 (Protocadherin-9)
Q6IEE7	TMEM132E	70	1000	R.EARPPSPAVAN*SSLQR.S	3.159	0.3	561.629	3	PSPAVANSSLQRS	3	Transmembrane protein 132E
Q6NSJ0	KIAA1161	240	1000	K.VN*DSVPFHLGWN*STER.S	2.838	1.37	932.437	2	AAAIKVNDSVPFH	1	Uncharacterized family 31 glucosidase KIAA1161 (EC 3.2.1.-)
Q6NSJ0	KIAA1161	250	1000	K.VN*DSVPFHLGWN*STER.S	2.838	1.37	932.437	2	PFHLGWNSTERSL	1	Uncharacterized family 31 glucosidase KIAA1161 (EC 3.2.1.-)
Q6P4Q7	CNNM4	127	1000	R.GN*TSGVLVVLTK.F	3.515	1.03	595.848	2	VNVSRGNTSGVLV	1	Metal transporter CNNM4 (Ancient conserved domain-containing protein 4) (Cyclin-M4)
Q6UVK1	CSPG4	1202	1000	R.AGQPATAFSQQDLLDGAVLYSHN*GSLSPR.D	4.056	0.05	1001.83	3	AVLYSHNGSLSPR	1	Chondroitin sulfate proteoglycan 4 (Chondroitin sulfate proteoglycan NG2) (Melanoma chondroitin sulfate proteoglycan) (Melanoma-associated chondroitin sulfate proteoglycan)
Q6YHK3	CD109	419	1000	K.IN*YTVPQSGTFK.I	2.297	-0.47	679.348	2	EAVQKINYTVPQS	1	CD109 antigen (150 kDa TGF-beta-1-binding protein) (C3 and PZP-like alpha-2-macroglobulin domain-containing protein 7) (Platelet-specific Gov antigen) (p180) (r150) (CD antigen CD109)
Q6ZNA5	FRRS1	138	37.549	K.VYWNAPSSAPN*HTQFLVTVVEK.Y	2.857	0.12	830.757	3	APSSAPNHTQFLV	1	Ferric-chelate reductase 1 (EC 1.-.-.-) (Stromal cell-derived receptor 2) (SDR-2)
Q6ZRP7	QSOX2	266	3.63	K.LGVSSVPSCYLIYPN*GSHGLINVVKPLR.A	3.467	0.33	761.414	4	CYLIYPNGSHGLI	3	Sulfhydryl oxidase 2 (EC 1.8.3.2) (Neuroblastoma-derived sulfhydryl oxidase) (Quiescin Q6-like protein 1)
Q7KYR7	BTN2A1	216	54.586	R.N*MSCSIN*NTLLGQK.K	2.755	0.86	793.371	2	RDKSVRNMSCSIN	1	Butyrophilin subfamily 2 member A1
Q7KYR7	BTN2A1	222	0	R.N*MSCSIN*NTLLGQK.K	2.755	0.86	793.371	2	NMSCSINNTLLGQ	1	Butyrophilin subfamily 2 member A1
Q86V85	GPR180	105	1000	K.AQLTMTMN*QTEHN*LTVSQIPSPQTWHVFYADK.Y	4.484	-1.11	931.444	4	QLTMTMNQTEHNL	1	Integral membrane protein GPR180 (Intimal thickness-related receptor)
Q86V85	GPR180	110	1000	K.AQLTMTMN*QTEHN*LTVSQIPSPQTWHVFYADK.Y	4.484	-1.11	931.444	4	MNQTEHNLTVSQI	1	Integral membrane protein GPR180 (Intimal thickness-related receptor)
Q8IWA5	SLC44A2	417	84.609	K.TCNPETFPSSN*ESR.Q	2.716	0.95	814.842	2	ETFPSSNESRQCP	1	Choline transporter-like protein 2 (Solute carrier family 44 member 2)
Q8N8Z6	DCBLD1	277	1000	R.ASSSWQSVN*ESGDQVHWSPGQAR.L	2.82	1.45	835.043	3	SSWQSVNESGDQV	5	Discoidin, CUB and LCCL domain-containing protein 1
Q8NAT1	POMGNT2	543	25.731	K.YEVWLQEQGENTYVPYILALQN*HTFTEN*IKPFTTYLVWVR.C	5.358	2.33	1228.12	4	YILALQNHTFTEN	1	Protein O-linked-mannose beta-1,4-N-acetylglucosaminyltransferase 2 (POMGnT2) (EC 2.4.1.-) (Extracellular O-linked N-acetylglucosamine transferase-like) (Glycosyltransferase-like domain-containing protein 2)
Q8NBJ5	COLGALT1	96	15.007	R.TALWVATDHNMDN*TSTVLR.E	2.82	2.02	716.682	3	TDHNMDNTSTVLR	1	Procollagen galactosyltransferase 1 (EC 2.4.1.50) (Collagen beta(1-O)galactosyltransferase 1) (Glycosyltransferase 25 family member 1) (Hydroxylysine galactosyltransferase 1)
Q8NE01	CNNM3	73	1000	R.LFGPGFAN*SSWSWVAPEGAGCR.E	3.85	3.18	1178.54	2	FGPGFANSSWSWV	1	Metal transporter CNNM3 (Ancient conserved domain-containing protein 3) (Cyclin-M3)
Q8NFZ8	CADM4	67	1000	R.QTLFFN*GTR.A	1.888	0.55	543.777	2	RQTLFFNGTRALK	1	Cell adhesion molecule 4 (Immunoglobulin superfamily member 4C) (IgSF4C) (Nectin-like protein 4) (NECL-4) (TSLC1-like protein 2)
Q8NFZ8	CADM4	262	24.243	R.WNRGN*ESLPER.A	2.382	1.39	680.829	2	IRWNRGNESLPER	1	Cell adhesion molecule 4 (Immunoglobulin superfamily member 4C) (IgSF4C) (Nectin-like protein 4) (NECL-4) (TSLC1-like protein 2)
Q8TEM1	NUP210	1039	1000	R.AASPIITLVALDEALDN*YTITFLIR.G	3.785	1.73	912.838	3	LDEALDNYTITFL	1	Nuclear pore membrane glycoprotein 210 (Nuclear pore protein gp210) (Nuclear envelope pore membrane protein POM 210) (POM210) (Nucleoporin Nup210) (Pore membrane protein of 210 kDa)
Q8WWI5	SLC44A1	135	35.269	K.FAEIN*GSALCSYNLKPSEYTTSPK.S	3.537	0.81	894.095	3	QKFAEINGSALCS	2	Choline transporter-like protein 1 (CDw92) (Solute carrier family 44 member 1) (CD antigen CD92)
Q8WWI5	SLC44A1	180	1000	R.CAPVN*ISCYAK.F	2.812	0.56	643.294	2	HRCAPVNISCYAK	1	Choline transporter-like protein 1 (CDw92) (Solute carrier family 44 member 1) (CD antigen CD92)
Q969P0	IGSF8	327	1000	R.IGPGEPLELLCN*VSGALPPAGR.H	4.096	0.95	1110.58	2	PLELLCNVSGALP	2	Immunoglobulin superfamily member 8 (IgSF8) (CD81 partner 3) (Glu-Trp-Ile EWI motif-containing protein 2) (EWI-2) (Keratinocytes-associated transmembrane protein 4) (KCT-4) (LIR-D1) (Prostaglandin regulatory-like protein) (PGRL) (CD antigen CD316)
Q969P0	IGSF8	463	1000	R.GETASLLCN*ISVR.G	2.661	1	711.861	2	TASLLCNISVRGG	1	Immunoglobulin superfamily member 8 (IgSF8) (CD81 partner 3) (Glu-Trp-Ile EWI motif-containing protein 2) (EWI-2) (Keratinocytes-associated transmembrane protein 4) (KCT-4) (LIR-D1) (Prostaglandin regulatory-like protein) (PGRL) (CD antigen CD316)
Q96GP6	SCARF2	310	1000	R.CLTCEPGWN*GTK.C	2.692	-0.87	713.304	2	TCEPGWNGTKCDQ	1	Scavenger receptor class F member 2 (SRECRP-1) (Scavenger receptor expressed by endothelial cells 2 protein) (SREC-II)
Q96JJ7	TMX3	258	1000	K.LVALAVIDEKN*TSVEHTR.L	3.695	1.52	666.698	3	AVIDEKNTSVEHT	1	Protein disulfide-isomerase TMX3 (EC 5.3.4.1) (Thioredoxin domain-containing protein 10) (Thioredoxin-related transmembrane protein 3)
Q96KA5	CLPTM1L	101	0	R.NN*GTLYAYIFLHHAGVLPWHDGK.Q	3.407	-0.39	876.107	3	PKKTRNNGTLYAY	2	Cleft lip and palate transmembrane protein 1-like protein (CLPTM1-like protein) (Cisplatin resistance-related protein 9) (CRR9p)
Q99523	SORT1	162	24.437	K.NFKDITDLIN*NTFIR.T	4.121	-1.07	913.979	2	DITDLINNTFIRT	1	Sortilin (100 kDa NT receptor) (Glycoprotein 95) (Gp95) (Neurotensin receptor 3) (NT3) (NTR3)
Q9BVK6	TMED9	125	1000	R.FTFTSHTPGEHQICLHSN*STK.F	3.912	0.52	811.378	3	QICLHSNSTKFSL	1	Transmembrane emp24 domain-containing protein 9 (GMP25) (Glycoprotein 25L2) (p24 family protein alpha-2) (p24alpha2) (p25)
Q9BX67	JAM3	192	4.988	R.N*SSFHLNSETGTLVFTAVHK.D	2.781	-0.27	731.367	3	ANPRFRNSSFHLN	8	Junctional adhesion molecule C (JAM-C) (JAM-2) (Junctional adhesion molecule 3) (JAM-3)
Q9BXP2	SLC12A9	243	1000	R.FGHFTGFN*SSTLK.D	3.179	0.62	723.351	2	GHFTGFNSSTLKD	1	Solute carrier family 12 member 9 (Cation-chloride cotransporter 6) (hCCC6) (Cation-chloride cotransporter-interacting protein 1) (CCC-interacting protein 1) (hCIP1) (Potassium-chloride transporter 9) (WO3.3)
Q9BY67	CADM1	304	6.454	R.VDDEMPQHAVLSGPNLFINNLN*KTDN*GTYR.C	3.062	-0.42	845.406	4	LFINNLNKTDNGT	1	Cell adhesion molecule 1 (Immunoglobulin superfamily member 4) (IgSF4) (Nectin-like protein 2) (NECL-2) (Spermatogenic immunoglobulin superfamily) (SgIgSF) (Synaptic cell adhesion molecule) (SynCAM) (Tumor suppressor in lung cancer 1) (TSLC-1)
Q9BY67	CADM1	308	4.757	R.VDDEMPQHAVLSGPNLFINNLN*KTDN*GTYR.C	3.062	-0.42	845.406	4	NLNKTDNGTYRCE	1	Cell adhesion molecule 1 (Immunoglobulin superfamily member 4) (IgSF4) (Nectin-like protein 2) (NECL-2) (Spermatogenic immunoglobulin superfamily) (SgIgSF) (Synaptic cell adhesion molecule) (SynCAM) (Tumor suppressor in lung cancer 1) (TSLC-1)
Q9BZM4	ULBP3	37	1000	R.ADAHSLWYN*FTIIHLPR.H	2.609	0.49	515.018	4	AHSLWYNFTIIHL	1	NKG2D ligand 3 (N2DL-3) (NKG2DL3) (ALCAN-gamma) (Retinoic acid early transcript 1N)
Q9H061	TMEM126A	126	1000	R.SGLTGLVIGGLYPVFLAIPVN*GGLAAR.Y	3.995	0.35	1314.75	2	FLAIPVNGGLAAR	2	Transmembrane protein 126A
Q9H2J7	SLC6A15	187	1000	K.N*ASHTFVEPECEQSSATTYYWYR.E	3.722	0.82	943.738	3	QCPLVKNASHTFV	1	Sodium-dependent neutral amino acid transporter B(0)AT2 (Sodium- and chloride-dependent neurotransmitter transporter NTT73) (Sodium-coupled branched-chain amino-acid transporter 1) (Solute carrier family 6 member 15) (Transporter v7-3)
Q9H813	TMEM206	148	1000	K.HHYEVIPPLTSPGQPGDMN*CTTQR.I	3.08	-0.41	685.319	4	GQPGDMNCTTQRI	3	Transmembrane protein 206
Q9H8M5	CNNM2	112	0	R.VYGQNINN*ETWSR.I	3.268	-0.39	792.37	2	YGQNINNETWSRI	1	Metal transporter CNNM2 (Ancient conserved domain-containing protein 2) (Cyclin-M2)
Q9HCU4	CELSR2	1501	1000	R.FGSVLGN*YSCAAQGTQGGSK.K	4.651	0.43	996.455	2	FGSVLGNYSCAAQ	2	Cadherin EGF LAG seven-pass G-type receptor 2 (Cadherin family member 10) (Epidermal growth factor-like protein 2) (EGF-like protein 2) (Flamingo homolog 3) (Multiple epidermal growth factor-like domains protein 3) (Multiple EGF-like domains protein 3)
Q9HCU4	CELSR2	1565	9.34	R.HIDMADFIANN*GTVPGCPAK.K	4.637	1.55	1066	2	ADFIANNGTVPGC	3	Cadherin EGF LAG seven-pass G-type receptor 2 (Cadherin family member 10) (Epidermal growth factor-like protein 2) (EGF-like protein 2) (Flamingo homolog 3) (Multiple epidermal growth factor-like domains protein 3) (Multiple EGF-like domains protein 3)
Q9HCU4	CELSR2	1741	1000	R.LHGLHLSN*ITVGGIPGPAGGVAR.G	2.925	0.12	732.743	3	HGLHLSNITVGGI	2	Cadherin EGF LAG seven-pass G-type receptor 2 (Cadherin family member 10) (Epidermal growth factor-like protein 2) (EGF-like protein 2) (Flamingo homolog 3) (Multiple epidermal growth factor-like domains protein 3) (Multiple EGF-like domains protein 3)
Q9HCU4	CELSR2	1900	1000	K.GFDPDCN*KTSGECHCK.E	2.555	-0.31	638.915	3	GFDPDCNKTSGEC	1	Cadherin EGF LAG seven-pass G-type receptor 2 (Cadherin family member 10) (Epidermal growth factor-like protein 2) (EGF-like protein 2) (Flamingo homolog 3) (Multiple epidermal growth factor-like domains protein 3) (Multiple EGF-like domains protein 3)
Q9HCU4	CELSR2	2061	1000	R.N*ATQHTAGYFGSDVK.V	3.15	0.12	799.87	2	LALLLRNATQHTA	1	Cadherin EGF LAG seven-pass G-type receptor 2 (Cadherin family member 10) (Epidermal growth factor-like protein 2) (EGF-like protein 2) (Flamingo homolog 3) (Multiple epidermal growth factor-like domains protein 3) (Multiple EGF-like domains protein 3)
Q9NT99	LRRC4B	400	49.59	R.TGTSMTSVNWLTPN*GTLMTHGSYR.V	2.635	-0.45	872.408	3	VNWLTPNGTLMTH	2	Leucine-rich repeat-containing protein 4B (Netrin-G3 ligand) (NGL-3)
Q9NV96	TMEM30A	294	31.275	R.YSLN*VTYNYPVHYFDGR.K	3.388	0.3	1055.99	2	AGRYSLNVTYNYP	3	Cell cycle control protein 50A (Transmembrane protein 30A)
Q9NX62	IMPAD1	259	1000	K.QVALQTFGN*QTTIIPAGGAGYK.V	4.866	0.22	1119.59	2	ALQTFGNQTTIIP	2	Inositol monophosphatase 3 (IMP 3) (IMPase 3) (EC 3.1.3.25) (EC 3.1.3.7) (Golgi 3-prime phosphoadenosine 5-prime phosphate 3-prime phosphatase) (Golgi-resident PAP phosphatase) (gPAPP) (Inositol monophosphatase domain-containing protein 1) (Inositol-1(or 4)-monophosphatase 3) (Myo-inositol monophosphatase A3)
Q9NYQ6	CELSR1	2122	1000	K.LSRN*ETQVDGAR.A	2.425	2.12	674.84	2	NEKLSRNETQVDG	2	Cadherin EGF LAG seven-pass G-type receptor 1 (Cadherin family member 9) (Flamingo homolog 2) (hFmi2)
Q9P2B2	PTGFRN	300	1000	K.ELDLTCN*ITTDR.A	2.471	-0.3	727.34	2	ELDLTCNITTDRA	1	Prostaglandin F2 receptor negative regulator (CD9 partner 1) (CD9P-1) (Glu-Trp-Ile EWI motif-containing protein F) (EWI-F) (Prostaglandin F2-alpha receptor regulatory protein) (Prostaglandin F2-alpha receptor-associated protein) (CD antigen CD315)
Q9P2B2	PTGFRN	383	52.891	K.ENSGYYYCHVSLWAPGHN*R.S	2.451	1.5	771.674	3	LWAPGHNRSWHKV	2	Prostaglandin F2 receptor negative regulator (CD9 partner 1) (CD9P-1) (Glu-Trp-Ile EWI motif-containing protein F) (EWI-F) (Prostaglandin F2-alpha receptor regulatory protein) (Prostaglandin F2-alpha receptor-associated protein) (CD antigen CD315)
Q9P2B2	PTGFRN	600	1000	R.YSVLIMAEKPVGDLSSPN*ETK.Y	2.778	0.53	761.056	3	GDLSSPNETKYII	5	Prostaglandin F2 receptor negative regulator (CD9 partner 1) (CD9P-1) (Glu-Trp-Ile EWI motif-containing protein F) (EWI-F) (Prostaglandin F2-alpha receptor regulatory protein) (Prostaglandin F2-alpha receptor-associated protein) (CD antigen CD315)
Q9UBG0	MRC2	69	1000	R.VTPACN*TSLPAQR.W	2.178	0.29	709.353	2	RVTPACNTSLPAQ	2	C-type mannose receptor 2 (C-type lectin domain family 13 member E) (Endocytic receptor 180) (Macrophage mannose receptor 2) (Urokinase-type plasminogen activator receptor-associated protein) (UPAR-associated protein) (Urokinase receptor-associated protein) (CD antigen CD280)
Q9UBG0	MRC2	140	1000	R.TSN*ISKPGTLER.G	2.318	0.41	653.349	2	LGARTSNISKPGT	1	C-type mannose receptor 2 (C-type lectin domain family 13 member E) (Endocytic receptor 180) (Macrophage mannose receptor 2) (Urokinase-type plasminogen activator receptor-associated protein) (UPAR-associated protein) (Urokinase receptor-associated protein) (CD antigen CD280)
Q9UIQ6	LNPEP	184	1000	R.YELSLHPN*LTSMTFR.G	3.529	-0.89	906.447	2	ELSLHPNLTSMTF	1	Leucyl-cystinyl aminopeptidase (Cystinyl aminopeptidase) (EC 3.4.11.3) (Insulin-regulated membrane aminopeptidase) (Insulin-responsive aminopeptidase) (IRAP) (Oxytocinase) (OTase) (Placental leucine aminopeptidase) (P-LAP) [Cleaved into: Leucyl-cystinyl aminopeptidase, pregnancy serum form]
Q9UIQ6	LNPEP	834	37.54	R.SALLEFACTHNLGN*CSTTAMK.L	4.894	-0.33	1165.03	2	CTHNLGNCSTTAM	2	Leucyl-cystinyl aminopeptidase (Cystinyl aminopeptidase) (EC 3.4.11.3) (Insulin-regulated membrane aminopeptidase) (Insulin-responsive aminopeptidase) (IRAP) (Oxytocinase) (OTase) (Placental leucine aminopeptidase) (P-LAP) [Cleaved into: Leucyl-cystinyl aminopeptidase, pregnancy serum form]
Q9UJ14	GGT7	267	1000	R.LPWSQVLAFAAAVAQDGFN*VTHDLAR.A	4.654	-1.25	934.147	3	VAQDGFNVTHDLA	3	Gamma-glutamyltransferase 7 (GGT 7) (EC 2.3.2.2) (Gamma-glutamyltransferase-like 3) (Gamma-glutamyltransferase-like 5) (Gamma-glutamyltranspeptidase 7) (Glutathione hydrolase 7) (EC 3.4.19.13) [Cleaved into: Gamma-glutamyltransferase 7 heavy chain; Gamma-glutamyltransferase 7 light chain]
Q9ULF5	SLC39A10	139	17.848	K.HFHSHN*HQHSHNHLNSEN*QTVTSVSTK.R	4.54	-4.88	788.358	4	NHLNSENQTVTSV	1	Zinc transporter ZIP10 (Solute carrier family 39 member 10) (Zrt- and Irt-like protein 10) (ZIP-10)
Q9ULF5	SLC39A10	191	13.38	R.LHHHLDHN*NTHHFHN*DSITPSER.G	4.884	0.32	701.072	4	HHHLDHNNTHHFH	3	Zinc transporter ZIP10 (Solute carrier family 39 member 10) (Zrt- and Irt-like protein 10) (ZIP-10)
Q9ULF5	SLC39A10	198	12.058	R.LHHHLDHN*NTHHFHN*DSITPSER.G	4.884	0.32	701.072	4	NTHHFHNDSITPS	3	Zinc transporter ZIP10 (Solute carrier family 39 member 10) (Zrt- and Irt-like protein 10) (ZIP-10)
Q9ULF5	SLC39A10	339	111.687	K.DLNEDDHHHECLN*VTQLLK.Y	4.505	0.25	1167.04	2	HHHECLNVTQLLK	1	Zinc transporter ZIP10 (Solute carrier family 39 member 10) (Zrt- and Irt-like protein 10) (ZIP-10)
Q9UMF0	ICAM5	646	13.38	R.VLAPGIYVCN*ATNR.H	3.305	-0.52	775.897	2	PGIYVCNATNRHG	3	Intercellular adhesion molecule 5 (ICAM-5) (Telencephalin)
Q9UMF0	ICAM5	795	23.354	R.APPGALNIGLSSN*N*STLSVAGAMGSHGGEYECAATNAHGR.H	4.913	0.94	976.451	4	NIGLSSNNSTLSV	1	Intercellular adhesion molecule 5 (ICAM-5) (Telencephalin)
Q9UMF0	ICAM5	796	19.607	R.APPGALNIGLSSN*N*STLSVAGAMGSHGGEYECAATNAHGR.H	4.913	0.94	976.451	4	IGLSSNNSTLSVA	1	Intercellular adhesion molecule 5 (ICAM-5) (Telencephalin)
Q9Y2C2	UST	84	1000	R.QYLGN*STYLDDHGPPPSK.V	2.635	-0.29	996.465	2	LRQYLGNSTYLDD	1	Uronyl 2-sulfotransferase (EC 2.8.2.-)
Q9Y2C2	UST	155	1000	K.N*ISTAEQPYLFTR.H	2.151	-0.1	771.888	2	QMELIKNISTAEQ	1	Uronyl 2-sulfotransferase (EC 2.8.2.-)
Q9Y2C2	UST	319	1000	R.KLGN*MTVTVK.K	2.117	-1.17	547.312	2	EHRKLGNMTVTVK	2	Uronyl 2-sulfotransferase (EC 2.8.2.-)

## Sheet: Description
Column Heading	Description
UniProt name	UniProt symbol of the protein
Gene symbol	Gene symbol for the assigned N-sialoglycoprotein
Site	The N-sialoglycosylation site
ModScore	Score matching the indicated N-sialoglycosylation site
Sequence	Sequence of theN-sialoglycopeptide obtained by ModScore, *-N-sialoglycosylation site; ^-methionine oxidation;
XCorr	SEQUEST Xcorr
ppm	Mass accuracy of the peptide
Obs m/z	Observed mass-to-charge ratio of the indicated peptide
z	Charge state of the peptide
Local sequence	Local sequence of the glycosylation site
Count	Number of times the sialoglycopeptide was identified
Annotation	Description of the protein function
