# Supplementary material for: Systematic and site-specific analysis of N-sialoglycosylated proteins on the cell surface by integrating click chemistry and MS-based proteomics
Source: Royal Society of Chemistry journal article supplement (doi:10.1039/c5sc01124h), 2015-01-01
Supplement: c5sc01124h3.xlsx [file c5sc01124h3.xlsx]

## Sheet: Fibronectin type III
Table S10. Up-regulated N-sialoglycoproteins based on important domains
Fibronectin type III domain
UniProt Name	Domain sequence range	E-value	Site	Ratio
P06213	Region: 495-618	1.97e-33
	Region: 622-702	2.04e-19
	Region: 802-944	6.85e-24
	Region: 808-832	2.04e-19
			445	5
			698	4.1
P13726	Region: 139-243	7.22e-36	156	11.1
			169	73.657
	Region: 41-145	6.46e-27
P16144	Region: 1128-1312	5.38e-36
	Region: 1526-1727	1.93e-34
			327	11.4
			695	5.8
P17181	Region: 32-122	6.26e-20	81	4.1
	Region: 111-223	7.45e-25
	Region: 229-339	7.76e-17
	Region: 334-430	8.01e-23
P28827	Region: 281-412	3.28e-14
	Region: 383-577	1.04e-28
	Region: 596-633	0.027
	Region: 686-734	0.027
			249	3.8
P29317	Region: 328-527	1.37e-30	407	6.3
			435	5.3
P29323	Region: 324-529	5.86e-41
			265	5.7
P30530	Region: 224-421	3.21e-25	339	1.3696
			345	1.68197
			198	4
P32004	Region: 625-810	1.66e-27	671	4.3
			726	4.26324
			777	1.54237
	Region: 822-1003	2.74e-35	931	4.9
			979	8.5
	Region: 1028-1091	0.000465
			203	4
			247	4.6
			479	2.8
P40189	Region: 123-221	1.93e-26	157	0.577683
	Region: 324-411	1.82e-06	379	6.96658
			390	6
	Region: 24-123	1.39e-46
	Region: 220-326	1.46e-24
	Region: 436-610	1.01e-19
Q12913	Region: 370-540	2.13e-15	413	5.9
	Region: 735-866	3.61e-07	824	5.5
	Region: 119-270	1.08e-11
	Region: 538-700	4.98e-14
	Region: 326-364	0.00151
Q99650	Region: 336-522	2.12e-17	491	3.6
	Region: 543-735	1.85e-16
	Region: 227-324	1.12e-15

## Sheet: Immunoglobulin-like
Immunoglobulin-like domain
UniProt name	Domain sequence range	E-value	Site	Ratio
O00478	Region: 31-143	1.71e-19	115	3.72
	Region: 156-236	4.94e-08
O75326	Region: 545-621	7.62e-07
			157	5.7
O95297	Region: 41-150	8.8e-21	50	13.9
P01889	Region: 208-300	2.83e-31	110	5.3
P01892	Region: 210-300	1.33e-30	110	20
P05362	Region: 213-309	1.24e-24	267	2.9
	Region: 109-203	1.44e-22	183	7.8
	Region: 28-109	3.19e-26
	Region: 392-479	6.78e-10
	Region: 310-392	1.51e-09
P13598	Region: 25-110	1.2e-28	82	0.526553
	Region: 108-206	3.19e-18	153	3.4
			176	1.48797
P28827	Region: 190-288	6.6e-10	249	3.8
P30479	Region: 208-300	2.96e-31
			110	37.7
P30530	Region: 139-224	1.14e-10	198	4
	Region: 36-130	5.68e-11
			339	1.3696
			345	1.68197
P32004	Region: 139-214	2.91e-09	203	4
	Region: 434-524	3.3e-17	479	2.8
	Region: 31-136	1.67e-15
	Region: 250-339	4.23e-20
	Region: 326-422	2.8e-17
	Region: 520-615	1.53e-16
			247	4.63349
			671	4.31317
			726	4.26324
			777	1.54237
			931	4.92099
			979	8.50346
P43121	Region: 249-341	7.57e-13
	Region: 346-415	2.91e-09
	Region: 136-225	4.56e-09
	Region: 430-514	1.02e-08
	Region: 33-139	5.02e-08
			418	2.4
Q01973	Region: 62-154	8.83e-21
			315	3.2
Q08722	Region: 33-129	4.69e-06	73	2.3
			111	1.96285
Q13308	Region: 126-219	3.75e-17	175	1.89021
	Region: 227-315	1.31e-12	283	2.7
	Region: 329-418	1.03e-14	405	0.384818
	Region: 594-687	2.52e-21	646	1.56152
	Region: 31-110	1.53e-10
	Region: 412-501	3.4e-19
	Region: 502-589	1.78e-14
			116	1.65766
Q13740	Region: 32-137	1.74e-09	95	3.13616
	Region: 157-234	7.53e-08	167	3.48438
	Region: 251-329	7.92e-10	265	0.519808
	Region: 385-491	8.9e-08	480	4
	Region: 334-392	1.39e-11
	Region: 435-449	1.39e-11
			499	2.7
Q29983	Region: 207-291	5.99e-21	220	2.1
			261	1.00469
			289	12.8
			79	5.7
			125	2.3
Q8IZF2	Region: 280-367	4.46e-10	301	0.509887
			315	2.4
	Region: 473-552	1.59e-07
	Region: 383-466	0.0176
			256	2.6
			627	2.2
			666	2.7
Q8N441	Region: 244-362	3.1e-16	255	1.29868
			293	4.86503
	Region: 28-118	2.34e-20
	Region: 147-239	2.35e-20
Q92854	Region: 563-650	4.52e-10
			379	2.5
Q96J84	Region: 119-223	2.31e-17	140	4.1
	Region: 219-304	6.61e-13	297	5.2
	Region: 22-120	3.53e-15
	Region: 307-395	6.86e-18
	Region: 392-487	3.81e-11
Q9NZQ7	Region: 147-221	3.88e-10	219	2.4
	Region: 19-128	1.99e-15
Q9Y639	Region: 165-227	1.82e-09	197	2.86061
	Region: 229-334	3.95e-17	284	3
	Region: 33-122	3.61e-16
			229	3.9

## Sheet: Growth factor receptor 
Growth factor receptor domain
UniProt Name	Domain sequence range	E-value	Site	Ratio
P01130	Region: 666-711	3.14e-15	657	7.8
	Region: 283-394	3.14e-15
P06213	Region: 179-335	1.57e-14
			445	5
			698	4.1
P29317	Region: 259-330	1.29e-05
	Region: 366-380	1.29e-05
			407	6.3
			435	5.3
P29323	Region: 253-324	3.14e-08	265	5.7
P48960	Region: 26-99	0.033	38	19.5
	Region: 82-194	3.37e-11	108	6.96682
	Region: 362-381	3.14e-08
			371	10.7603
			453	61.1254
Q07954	Region: 105-190	1e-09
	Region: 477-519	1e-09
	Region: 1182-1261	3.92e-13
	Region: 1527-1579	3.92e-13
	Region: 1846-1887	2.04e-07
	Region: 2158-2194	2.04e-07
	Region: 2472-2524	2.04e-07
	Region: 2917-3021	1.57e-21
	Region: 3280-3341	1.57e-21
			446	3.6
			1511	1.56401
			3089	3
Q6V0I7	Region: 3805-3817	4.71e-12
	Region: 3848-3942	4.71e-12
			483	0.489354
			676	1.63983
			2921	2.3
Q9ULI3	Region: 1148-1244	0.0337
			1080	3.6

## Sheet: EGF Laminin
EGF Laminin domain
UniProt Name	Domain sequence range	E-value	Site	Ratio
P05556	Region: 520-546	0.0268	520	5.67138
	Region: 554-592	6.98e-07
	Region: 595-636	5.3e-08
			50	1.90812
			212	14.2129
			481	14
			669	9.96555
P07996	Region: 547-601	2.3e-05
			1067	4.2
P15514	Region: 141-186	1e-12
			113	4.3
P16144	Region: 467-493	0.0502
	Region: 507-538	0.00809
	Region: 537-575	2.76e-07
	Region: 579-616	3.91e-05
			327	11.4
			695	5.8
P18084	Region: 549-587	5.3e-07	586	2.6
	Region: 474-501	0.0781
	Region: 518-549	0.0391
	Region: 592-632	1.06e-07
P48960	Region: 203-243	4.1e-09
			38	19.5
			108	6.96682
			371	10.7603
			453	61.1254
Q07954	Region: 802-847	3.74e-07
	Region: 3785-3831	1.08e-05
	Region: 3824-3860	0.000168
	Region: 4153-4186	0.0519
	Region: 4197-4232	8.1e-05
	Region: 4234-4272	0.000456
	Region: 4269-4305	0.00446
	Region: 4376-4414	0.00405
			446	3.6
			1511	1.56401
			3089	3
Q14517	Region: 4127-4165	4.07e-09
	Region: 4092-4130	1.54e-08
	Region: 4053-4089	3.73e-07
	Region: 4014-4056	7.22e-07
	Region: 3794-3825	0.0492
			1940	6.4
			3640	2.1
Q6V0I7	Region: 4428-4465	2.03e-06
			483	0.489354
			676	1.63983
			2921	2.3
Q9ULI3	Region: 1025-1062	5.11e-08
	Region: 986-1034	1.48e-07
			1080	3.6

## Sheet: Integrin 
Integrin domain
UniProt Name	Domain sequence range	E-value	Site	Ratio
P05556	Region: 638-726	4.05e-22	669	9.96555
	Region: 353-468	6.28e-22
			50	1.90812
			212	14.2129
			481	13.9825
			520	5.67138
P06756	Region: 31-468	1.16e-106	74	2.4
	Region: 769-997	1.15e-68	874	0.935397
	Region: 469-628	5.75e-46
	Region: 629-761	1.46e-36
P08648	Region: 42-489	7.32e-97	182	2.88491
	Region: 648-782	9.42e-33	675	0.646244
	Region: 789-1002	8.89e-51	868	15.3
	Region: 491-647	2.25e-42
P16144	Region: 624-709	1.83e-18	695	5.8
			327	11.375
P17301	Region: 341-649	3.14e-66	343	3.8
	Region: 934-1135	2.72e-40	1057	13.6
	Region: 30-149	3.14e-66
	Region: 792-929	5.23e-25
	Region: 653-791	4.34e-17
			105	5.4
P18084	Region: 633-715	9.15e-19
	Region: 377-466	5.18e-30
			586	2.6
P26006	Region: 33-464	9.94e-74	86	22.9
			107	3.7
			265	24
	Region: 464-617	1.31e-25	511	9.383
			573	28.2818
	Region: 618-754	6.28e-22	656	7.96004
	Region: 759-995	7.85e-43	926	9.73479
			951	1.347
P56199	Region: 339-664	2.22e-73	532	5.8
	Region: 29-148	2.22e-73
	Region: 667-810	2.09e-33
	Region: 813-939	4.24e-22
	Region: 945-1145	7.32e-20
