# Supplementary material for: Systematic and site-specific analysis of N-sialoglycosylated proteins on the cell surface by integrating click chemistry and MS-based proteomics
Source: Royal Society of Chemistry journal article supplement (doi:10.1039/c5sc01124h), 2015-01-01
Supplement: c5sc01124h4.xlsx [file c5sc01124h4.xlsx]

## Sheet: Sialylglycopeptide-quantified
Table S11. Quantification of 342 N-sialoglycosylation sites on the cell surface of breast cancer cells
UniProt name	Gene symbol	Sequence	Site	Modscore	Peptide ratio	Redun	Obs m/z	z	ppm	XCorr	Delta Corr
D6RDV5	EFNA5	K.VFVR@PTN*DTVHESAEPSR@.G	162	1000	3.20683	0	514.765	4	0.38	2.438	0.302
O00461	GOLIM4	R.KPDPAEQQN*VTQVAHSPQGYNTAR.E	257	148.557	1.21129	1	880.428	3	0.49	4.125	0.497
O00478	BTN3A3	R.IHN*VTASDSGK#.Y	115	1000	3.72038	19	570.288	2	1.15	1.79	0.411
O00592	PODXL	K.QLVLN*LTGNTLCAGGASDEK#.L	360	76.733	1.57303	2	1036.52	2	0.26	4.915	0.25
O14786	NRP1	R.GPECSQN*YTTPSGVIK.S	150	1000	19.714	5	870.904	2	0.67	4.232	0.529
O14786	NRP1	K.EGFSAN*YSVLQSSVSEDFK#.C	261	1000	1.42469	7	1052.99	2	-1.8	3.725	0.628
O15031	PLXNB2	R.ALSN*ISLR@.L	127	1000	3.54295	2	441.766	2	0.23	1.829	0.286
O15031	PLXNB2	K.SCVAVTSAQPQN*MSR@.R	528	1000	3.27376	0	822.887	2	0.65	4.286	0.517
O15031	PLXNB2	K.LSHDAN*ETLPLHLYVK#.S	733	1000	3.84758	0	466.001	4	0.35	3.233	0.328
O15031	PLXNB2	R.TEAGAFEYVPDPTFEN*FTGGVK#K#.Q	1099	1000	2.772	1	841.743	3	0.26	3.277	0.323
O15230	LAMA5	R.LN*ASIADLQSQLR@.S	2209	1000	0.798741	0	719.398	2	-0.66	2.967	0.472
O15230	LAMA5	R.TLSELMSQTGHLGLAN*ASAPSGEQLLR.T	2303	1000	0.701712	0	928.807	3	-0.14	3.909	0.25
O15394	NCAM2	R.FAMLANNNLQILNIN*K.S	177	48.874	0.196398	2	917.494	2	1.7	4.631	0.12
O15394	NCAM2	K.SFN*ATAERGEEMTFSCR.A	219	1000	0.0788484	2	665.953	3	0.84	3.612	0.667
O15394	NCAM2	R.YN*CTATNHIGTR.F	474	49.59	0.144942	1	470.882	3	-0.14	2.789	0.521
O15394	NCAM2	R.SHGVQTMVVLNNLEPN*TTYEIR.V	562	84.609	0.0430379	1	840.088	3	0.36	2.983	0.224
O15427	SLC16A3	R.R@PM^AN*GLAAAGSPVFLCALSPLGQLLQDR@.Y	149	1000	2.02616	7	1018.88	3	0.79	6.17	0.487
O43688	PPAP2C	R.VN*CSVYVQLEK#.V	139	1000	0.773863	4	675.341	2	0.36	2.953	0.495
O60449	LY75	K.DGHGTAISN*ASDVWK#.K	135	1000	1.50186	2	523.582	3	0.36	2.029	0.359
O75054	IGSF3	R.KNYN*NTWTR.L	655	24.437	0.263459	1	600.289	2	0.79	2.015	0.168
O75054	IGSF3	R.LSQAQGN*LSVLETR.Q	825	1000	0.332379	1	759.905	2	0.68	3.414	0.369
O75054	IGSF3	R.LTVLQASPQDTGN*YSCHVEEWLPSPQK.E	1077	1000	0.372484	1	1029.83	3	0.16	3.497	0.386
O75144	ICOSLG	K.TVVTYHIPQN*SSLENVDSR.Y	70	30.612	0.103906	2	721.357	3	-1.56	2.536	0.372
O75197	LRP5	R.IEVANLN*GTSR@.K	138	30.835	1.72638	1	591.819	2	0.5	2.523	0.153
O75326	SEMA7A	R.HPSCWNLVN*GTVVPLGEMR@.G	157	37.54	5.68792	1	1088.04	2	0.09	3.281	0.17
O75882	ATRN	R.GICN*SSDVR@.G	300	1000	1.04532	2	508.736	2	-0.16	1.683	0.374
O76082	SLC22A5	R.VPDAAN*LSSAWR.N	57	1000	0.190366	3	645.322	2	-0.25	2.507	0.564
O95084	PRSS23	R.GAN*DSTSAMPEQMK#.F	207	1000	5.69916	1	739.317	2	-0.21	3.252	0.541
O95297	MPZL1	K.EIFVAN*GTQGK#.L	50	1000	13.9462	5	587.808	2	0.43	2.724	0.434
O95477	ABCA1	K.HPEDVQSSN*GSVYTWR@.E	478	1000	1.78553	0	935.932	2	0.74	3.98	0.642
O95477	ABCA1	R.EAFN*ETNQAIR@.T	489	37.54	1.72506	0	651.32	2	0.67	3.005	0.3
P00533	EGFR	R.EFVENSECIQCHPECLPQAMN*ITCTGR@.G	568	100.037	1.28063	4	1097.14	3	2.09	4.879	0.556
P01033	TIMP1	K.FVGTPEVN*QTTLYQR@.Y	53	1000	2.06201	2	881.454	2	0.01	3.829	0.509
P01130	LDLR	R.LTGSDVNLLAENLLSPEDMVLFHN*LTQPR@.G	657	89.827	7.79717	7	1082.56	3	0.56	5.064	0.515
P01889	HLA-B	R.GYYN*QSEAGSHTLQSM^YGCDVGPDGR@.L	110	1000	5.33024	6	958.735	3	-0.25	4.698	0.299
P01892	HLA-A	R.GYYN*QSEAGSHTVQR.M	110	1000	19.9532	1	850.382	2	1.1	4.688	0.617
P01903	HLA-DRA	K.R@SN*YTPITNVPPEVTVLTNSPVELR@.E	103	23.523	1.95633	0	937.845	3	0.72	5.064	0.056
P02786	TFRC	K.K#DFEDLYTPVN*GSIVIVR@.A	251	1000	1.05823	1	1041.57	2	2.07	3.951	0.572
P02786	TFRC	K.QNNGAFN*ETLFR.N	727	31.275	0.158984	2	707.336	2	0.35	2.288	0.468
P04040	CAT	R.HMN*GYGSHTFK#.L	213	1000	3.59614	0	430.529	3	0.08	3.326	0.409
P04062	GBA	R.TYTYADTPDDFQLHN*FSLPEEDTK.L	185	1000	0.782222	5	950.756	3	0.26	3.113	0.583
P04156	PRNP	R.YPNQVYYR@PMDEYSNQNNFVHDCVN*ITIK#.Q	181	26.359	16.045	2	910.425	4	0.42	3.71	0.019
P04156	PRNP	K.GEN*FTETDVK#.M	197	1000	9.39374	2	575.766	2	0.3	2.798	0.502
P04233	CD74	R.MATPLLMQALPMGALPQGPMQN*ATK#.Y	130	1000	1.39905	5	1311.17	2	-1.62	3.629	0.422
P04233	CD74	K.YGN*MTEDHVMHLLQNADPLK#.V	136	143.502	3.77022	2	779.705	3	0.85	3.527	0.402
P04626	ERBB2	K.NNQLALTLIDTN*R@.S	187	122.154	1.07628	3	747.91	2	1.76	2.327	0.452
P04626	ERBB2	R.GHCWGPGPTQCVN*CSQFLR@.G	530	1000	1.53416	4	757.334	3	-0.13	4.415	0.523
P05026	ATP1B1	K.LEWLGN*CSGLNDETYGYK.E	158	100.207	2.20106	3	1061.47	2	0.42	5.352	0.243
P05026	ATP1B1	R.VLGFKPKPPKN*ESLETYPVM^K.Y	193	1000	6.04168	3	807.77	3	-0.62	3.912	0.381
P05362	ICAM1	R.DHHGAN*FSCR@.T	183	1000	7.80366	1	403.84	3	0	2.466	0.356
P05362	ICAM1	R.LNPTVTYGN*DSFSAK.A	267	64.398	2.91845	1	808.888	2	-0.16	2.319	0.527
P05556	ITGB1	K.SCGECIQAGPNCGWCTN*STFLQEGMPTSAR@.C	50	28.218	1.90812	10	1129.14	3	0	4.511	0.169
P05556	ITGB1	R.NPCTSEQN*CTSPFSYK#.N	212	123.857	14.2129	4	965.9	2	0.26	4.614	0.538
P05556	ITGB1	K.CHEGN*GTFECGACR.C	481	1000	13.9825	4	829.306	2	0.66	4.373	0.789
P05556	ITGB1	R.KEN*SSEICSNNGECVCGQCVCR.K	520	100.742	5.67138	5	884.015	3	-0.53	4.9	0.172
P05556	ITGB1	K.KDTCTQECSYFN*ITK#.V	669	1000	9.96555	4	953.421	2	0.76	3.918	0.14
P06213	INSR	K.HN*LTITQGK#.L	445	1000	4.98831	1	511.784	2	0.51	2.863	0.456
P06213	INSR	K.HN*QSEYEDSAGECCSCPK#.T	698	1000	4.0571	1	723.603	3	0.52	4.936	0.868
P06731	CEACAM5	K.NSGLYTCQAN*NSASGHSR.T	480	30.835	0.0226908	1	642.947	3	0.35	2.74	0.109
P06733	ENO1	K.LAQAN*GWGVMVSHR@.S	363	1000	0.684893	1	512.264	3	-0.31	2.503	0.32
P06756	ITGAV	K.AN*TTQPGIVEGGQVLK#.C	74	1000	2.39562	2	811.941	2	0.99	3.005	0.402
P06756	ITGAV	K.ISSLQTTEKN*DTVAGQGERDHLITK.R	874	1000	0.935397	3	915.47	3	0.34	3.503	0.343
P07686	HEXB	K.LDSFGPINPTLN*TTYSFLTTFFK#.E	327	59.298	0.602674	1	1318.17	2	1.39	4.524	0.372
P07737	PFN1	R.SSFYVN*GLTLGGQK#.C	62	1000	2.43572	2	741.385	2	1.11	3.398	0.49
P07996	THBS1	K.VVN*STTGPGEHLR@.N	1067	1000	4.22061	0	688.361	2	-0.17	3.09	0.504
P08069	IGF1R	R.ACTENNECCHPECLGSCSAPDN*DTACVACR.H	244	92.247	0.293199	2	1173.43	3	0.33	6.128	0.57
P08069	IGF1R	R.DVMQVAN*TTMSSR.S	747	1000	0.147711	1	721.828	2	-0.36	3.067	0.439
P08174	CD55	K.GSQWSDIEEFCN*R.S	95	1000	1.10263	10	815.838	2	0.01	2.944	0.407
P08195	SLC3A2	K.DASSFLAEWQN*ITK.G	365	1000	0.632988	5	806.891	2	0.22	3.043	0.442
P08195	SLC3A2	R.LLIAGTN*SSDLQQILSLLESNK#.D	381	198.394	0.988937	5	1184.65	2	0.19	5.007	0.564
P08195	SLC3A2	K.SLVTQYLN*ATGNR@.W	424	76.733	0.410613	6	723.382	2	-0.29	3.016	0.352
P08581	MET	R.HVFPHN*HTADIQSEVHCIFSPQIEEPSQCPDCVVSALGAK#.V	149	1000	1.89336	2	911.229	5	1.36	3.687	0.327
P08581	MET	R.CLQHFYGPNHEHCFN*R@.T	399	76.035	5.29342	2	708.975	3	-0.17	3.57	0.373
P08648	ITGA5	R.TEK#EPLSDPVGTCYLSTDN*FTR@.I	182	1000	2.88491	0	849.738	3	-0.02	4.509	0.568
P08648	ITGA5	K.NALN*LTFHAQNVGEGGAYEAELR@.V	675	30.835	0.646244	0	828.41	3	0.81	3.882	0.043
P08648	ITGA5	R.VTGLN*CTTNHPINPK#.G	868	31.275	15.3201	0	838.923	2	-0.78	3.73	0.264
P08962	CD63	K.CCGAAN*YTDWEK#.I	150	1000	0.990515	6	743.29	2	-1.04	3.302	0.593
P09603	CSF1	K.NVFN*ETK#.N	154	42.098	26.1792	3	431.718	2	0.07	1.796	0.412
P09603	CSF1	K.NCN*NSFAECSSQGHER@.Q	172	24.437	2.44825	0	953.374	2	-0.91	3.828	0.089
P09758	TACSTD2	R.HR@PTAGAFN*HSDLDAELR@R@.L	168	1000	1.32556	0	1092.57	2	1.3	3.093	0.275
P10586	PTPRF	R.KVEVEPLN*STAVHVYWK.L	721	1000	0.68081	5	1001.53	2	0.74	4.909	0.594
P10586	PTPRF	R.DINSQQELQN*ITTDTR.F	966	127.526	0.831709	4	939.95	2	-0.08	3.912	0.518
P10909	CLU	R.LAN*LTQGEDQYYLR.V	374	1000	0.251068	6	843.914	2	-0.56	3.381	0.444
P11047	LAMC1	K.IPAIN*QTITEANEK.T	1395	109.529	0.639515	0	772.907	2	1.05	3.096	0.515
P11142	HSPA8	K.TVTNAVVTVPAYFN*DSQR@.Q	151	49.59	1.11973	7	996.007	2	-0.07	2.787	0.326
P11166	SLC2A1	K.VIEEFYN*QTWVHR.Y	45	1000	0.955813	2	862.421	2	1.87	3.496	0.425
P11279	LAMP1	R.SSCGK#EN*TSDPSLVIAFGR@.G	84	1000	0.739668	1	681.337	3	1.82	2.494	0.306
P11279	LAMP1	R.GHTLTLN*FTR@.N	103	1000	1.12471	1	584.82	2	1.87	1.994	0.403
P11717	IGF2R	R.MSVINFECN*K#.T	435	20.167	0.832112	0	626.787	2	-0.29	1.896	0.028
P11717	IGF2R	K.HFN*YTSLIAFHCK.R	1757	1000	0.428733	0	547.597	3	-0.87	2.581	0.335
P13473	LAMP2	K.WQMN*FTVR@.Y	49	1000	1.03344	2	545.77	2	0.18	1.75	0.304
P13473	LAMP2	K.TVTISDHGTVTYN*GSICGDDQNGPK.I	75	133.582	0.990686	3	880.398	3	0.52	3.829	0.325
P13473	LAMP2	K.IAVQFGPGFSWIAN*FTK.A	101	1000	1.39779	3	943.49	2	-0.71	4.746	0.513
P13473	LAMP2	K.VASVININPN*TTHSTGSCR.S	257	30.835	6.51132	5	1016	2	1.4	4.554	0.21
P13598	ICAM2	K.HYLVSN*ISHDTVLQCHFTCSGK#.Q	82	1000	0.526553	4	654.309	4	-0.13	3.781	0.445
P13598	ICAM2	R.GN*ETLHYETFGK#.A	153	1000	3.39015	5	703.832	2	0.1	2.856	0.337
P13598	ICAM2	K.AAPAPQEATATFN*STADR@EDGHR@.N	176	1000	1.48797	4	1214.58	2	1.09	2.852	0.391
P13726	F3	K.VN*VTVEDER@.T	156	1000	11.0575	1	535.271	2	0.12	2.386	0.434
P13726	F3	R.R@N*NTFLSLR@.D	169	24.437	73.657	1	568.329	2	0.57	2.695	0.151
P13987	CD59	K.TAVN*CSSDFDACLITK#.A	43	1000	0.421543	3	906.911	2	1.19	3.758	0.578
P15328	FOLR1	K.NACCSTN*TSQEAHK#.D	69	58.167	1.79932	0	540.224	3	0.34	2.585	0.526
P15328	FOLR1	K.GWN*WTSGFNK#.C	161	123.857	1.6591	0	604.279	2	0.3	2.747	0.324
P15514	AREG	R.VEQVVK#PPQN*K#.T	113	1000	4.34348	1	642.873	2	0.15	2.683	0.407
P15529	CD46	K.GYFYIPPLATHTICDR@N*HTWLPVSDDACYR@.E	83	1000	1.27249	14	1218.58	3	0.26	3.565	0.355
P16070	CD44	K.AFN*STLPTM^AQMEK#.A	57	1000	11.351	26	798.374	2	-0.63	2.902	0.016
P16144	ITGB4	K.HNIIPIFAVTN*YSYSYYEK#.L	327	171.488	11.375	4	1167.08	2	0.59	5.419	0.577
P16144	ITGB4	R.CSFR@DEDDDCTYSYTMEGDGAPGPN*STVLVHK#.K	695	1000	5.84519	4	910.886	4	-0.11	5.115	0.64
P17181	IFNAR1	K.LSGCQN*ITSTK.C	81	1000	4.06865	5	606.295	2	-0.39	2.717	0.586
P17301	ITGA2	K.LNLQTSTSIPN*VTEMK#.T	105	143.484	5.4315	4	893.965	2	0.16	4.656	0.644
P17301	ITGA2	R.YFFN*VSDEAALLEK#.A	343	1000	3.84598	3	828.911	2	0.63	4.079	0.572
P17301	ITGA2	R.TASCSN*VTCWLK#.D	1057	1000	13.5879	0	719.327	2	-0.22	1.924	0.446
P18084	ITGB5	K.CHAGYIGDNCN*CSTDISTCR@.G	586	59.298	2.59053	1	790.645	3	0.55	4.444	0.172
P20645	M6PR	R.EAGN*HTSGAGLVQINK.S	83	182.307	0.368146	3	799.905	2	0.52	4.169	0.458
P21589	NT5E	R.IK#LDN*YSTQELGK#.T	333	1000	54.6254	3	764.41	2	0.27	3.934	0.518
P21860	ERBB3	R.QLCYHHSLN*WTK.V	469	1000	0.278018	2	795.375	2	0.12	2.58	0.386
P21980	TGM2	R.TVSYN*GILGPECGTK#.Y	517	1000	2.19504	3	803.892	2	0.16	2.898	0.583
P22413	ENPP1	K.MN*ASFSLK#.S	285	1000	5.42472	1	454.73	2	0.13	2.17	0.337
P22413	ENPP1	K.MYN*GSVPFEER@.I	341	1000	14.218	1	669.305	2	0.17	2.474	0.491
P23229	ITGA6	K.EINSLN*LTESHNSR@K#.K	930	24.243	1.32928	6	879.956	2	-0.74	3.406	0.349
P25942	CD40	K.DLVVQQAGTN*K#TDVVCGPQDR@.L	180	1000	0.988628	0	773.055	3	-0.56	4.869	0.442
P26006	ITGA3	R.ELAVPDGYTN*R@.T	86	1000	22.8758	2	622.311	2	0.52	2.322	0.393
P26006	ITGA3	K.DDCER@MN*ITVK#.N	107	1000	3.73019	2	466.554	3	0.03	2.384	0.444
P26006	ITGA3	K.N*ITIVTGAPR@.H	265	1000	24.0248	2	525.811	2	0.32	2.395	0.45
P26006	ITGA3	R.R@N*ITLAYTLEADR@DR@.R	511	1000	9.383	1	914.501	2	0.35	2.542	0.327
P26006	ITGA3	K.LR@PIIISMN*YSLPLR@.M	573	1000	28.2818	1	601.028	3	0.68	3.024	0.366
P26006	ITGA3	K.LLLSIN*VTNTR@.T	656	73.311	7.96004	2	626.877	2	0.48	2.911	0.205
P26006	ITGA3	R.AHCVWLECPIPDAPVVTN*VTVK#.A	926	1000	9.73479	1	839.427	3	0.71	5	0.315
P26006	ITGA3	R.VN*GWATLFLR@.T	951	1000	1.347	1	593.334	2	0.21	2.493	0.33
P27701	CD82	R.DYN*SSR@EDSLQDAWDYVQAQVK#.C	129	1000	1.78058	2	878.739	3	0.17	5.012	0.565
P28827	PTPRM	R.FIASFNVVN*TTK#.R	249	37.54	3.76683	5	676.365	2	-0.27	2.111	0.22
P29317	EPHA2	R.TSVTVSDLEPHM^N*YTFTVEAR@.N	407	1000	6.25821	0	808.052	3	0.03	1.99	0.349
P29317	EPHA2	R.TASVSIN*QTEPPK#.V	435	1000	5.34633	0	691.86	2	-0.21	2.637	0.339
P29323	EPHB2	K.AGFEAVEN*GTVCR@.G	265	1000	5.65862	4	709.831	2	-0.72	2.88	0.566
P30479	HLA-B	R.GYYN*QSEAGSHTWQR@.M	110	1000	37.708	2	896.897	2	0.18	4.387	0.634
P30530	AXL	R.SLHVPGLN*K#.T	198	1000	3.98782	1	488.283	2	-0.27	2.148	0.365
P30530	AXL	R.VACTSSQGPSSWTHWLPVETPEGVPLGPPEN*ISATR@.N	339	1000	1.3696	2	964.222	4	-0.15	3.079	0.371
P30530	AXL	R.N*GSQAFVHWQEPR@.A	345	1000	1.68197	2	782.877	2	-0.87	2.893	0.453
P30825	SLC7A1	K.NWQLTEEDFGN*TSGR.L	226	166.39	0.175082	0	878.887	2	0.43	4.296	0.673
P32004	L1CAM	R.VTMGQNGNLYFANVLTSDN*HSDYICHAHFPGTR@.T	203	23.711	4.00361	4	749.948	5	0.06	3.257	0.259
P32004	L1CAM	R.LLFPTN*SSSHLVALQGQPLVLECIAEGFPTPTIK#.W	247	1000	4.63349	4	922.997	4	0.91	4.114	0.43
P32004	L1CAM	R.FFPYAN*GTLGIR@.D	479	1000	2.77964	4	682.863	2	-0.08	2.389	0.284
P32004	L1CAM	K.VPGN*QTSTTLK#.L	671	1000	4.31317	5	578.813	2	0.14	2.373	0.225
P32004	L1CAM	K.NPVDVK#GEGN*ETTNMVITWK#PLR@.W	726	34.089	4.26324	5	656.599	4	0.6	4.086	0.203
P32004	L1CAM	R.GPWQEQIVSDPFLVVSN*TSTFVPYEIK.V	777	1000	1.54237	4	1028.52	3	0.65	3.22	0.234
P32004	L1CAM	R.GSGPASEFTFSTPEGVPGHPEALHLECQSN*TSLLLR@.W	931	1000	4.92099	4	958.718	4	0.36	4.488	0.359
P32004	L1CAM	R.THN*LTDLSPHLR.Y	979	1000	8.50346	4	703.866	2	-1.2	2.725	0.473
P35052	GPC1	R.ICPQGYTCCTSEMEENLAN*R@.S	79	19.843	1.47432	4	1221.5	2	-0.54	4.734	0.093
P35052	GPC1	R.SFDDHFQHLLN*DSER.T	116	1000	5.73244	4	931.913	2	0.29	4.535	0.534
P35613	BSG	K.ILLTCSLN*DSATEVTGHR.W	160	1000	1.15185	2	995.494	2	0.86	4.057	0.546
P36941	LTBR	K.AGHFQN*TSSPSAR@.C	177	1000	2.50125	4	684.828	2	0.57	2.572	0.436
P40189	IL6ST	R.ETHLETN*FTLK#.S	157	1000	0.577683	3	672.345	2	0.38	2.393	0.385
P40189	IL6ST	K.SHLQN*YTVNATK#.L	379	97.748	3.30179	1	693.854	2	0.96	3.699	0.375
P40189	IL6ST	K.LTVN*LTNDR@.Y	390	37.54	6.04922	1	527.79	2	0.1	2.155	0.267
P42892	ECE1	K.HLLEN*STASVSEAERK.A	166	1000	8.3739	5	591.967	3	0.4	3.754	0.465
P42892	ECE1	R.DYYLN*KTENEK.V	270	59.298	2.84721	4	710.329	2	-0.76	2.923	0.281
P42892	ECE1	K.LLGGGDEEAIR@PQMQQILDFETALAN*ITIPQEK#.R	316	1000	1.94511	4	1219.3	3	-0.12	3.848	0.302
P42892	ECE1	R.FFN*FSWR.V	539	1000	3.12152	4	503.738	2	1.14	1.903	0.402
P42892	ECE1	K.R@QTECMVEQYSN*YSVNGEPVNGR@.H	651	71.067	2.38204	4	911.415	3	-0.91	4.641	0.288
P43121	MCAM	R.CVASVPSIPGLN*R@.T	418	1000	2.40469	1	689.871	2	0.67	2.128	0.353
P48960	CD97	R.WCPQNSSCVN*ATACR@.C	38	51.004	19.525	6	910.379	2	-0.07	4.036	0.329
P48960	CD97	K.TFK#N*ESENTCQDVDECSSGQHQCDSSTVCFNTVGSYSCR@.C	108	31.769	6.96682	2	1150.21	4	0.23	4.376	0.095
P48960	CD97	R.GDK#N*VTMGQSSAR@.M	371	1000	10.7603	2	684.338	2	1.8	2.393	0.364
P48960	CD97	R.R@LSAVNSIFLSHN*NTK#.E	453	30.835	61.1254	2	606.67	3	0.83	4.932	0.083
P50895	BCAM	R.TQN*FTLLVQGSPELK#.T	439	1000	0.577483	0	843.459	2	0.76	2.89	0.436
P50990	CCT8	R.TAYGPN*GMNK#.M	50	24.243	2.04004	2	532.247	2	0.43	2.781	0.089
P54709	ATP1B3	K.N*LTVCPDGALFEQK.G	124	1000	5.75115	2	797.887	2	-0.02	2.404	0.354
P54760	EPHB4	R.LN*GSSLHLEWSAPLESGGR@.E	335	1000	0.864657	1	1010.01	2	0.16	3.902	0.52
P54852	EMP3	K.ESLNLWYDCTWNN*DTK#.T	47	24.437	1.72554	2	1035.45	2	1.28	2.985	0.009
P56159	GFRA1	K.ETN*FSLASGLEAK.D	59	1000	0.0716917	1	685.341	2	0.83	3.397	0.465
P56199	ITGA1	K.VYVYALN*QTR@.F	532	1000	5.84013	0	618.334	2	0.41	2.92	0.453
P62841	RPS15	R.DMIILPEMVGSMVGVYN*GK#.T	98	1000	1.22421	5	1032.52	2	1.98	4.719	0.497
P62937	PPIA	K.HTGPGILSMANAGPNTN*GSQFFICTAK#.T	108	20.167	3.46583	3	934.782	3	-0.09	5.889	0.178
P78310	CXADR	K.SGDASIN*VTNLQLSDIGTYQCK#.V	106	53.534	0.852074	5	1198.08	2	1.67	3.077	0.311
P78325	ADAM8	R.CCN*STTCQLAEGAQCAHGTCCQECK#.V	436	1000	1.86574	2	1001.37	3	-0.11	5.083	0.71
P78536	ADAM17	R.EQQLESCACN*ETDNSCK.V	594	44.278	1.28498	1	1038.4	2	-0.19	4.223	0.202
P98172	EFNB1	K.HHDYYITSTSN*GSLEGLENR.E	139	161.681	0.669961	0	766.017	3	-0.15	3.894	0.553
Q01973	ROR1	K.CYN*STGVDYR@.G	315	1000	3.16532	1	622.265	2	-0.46	2.652	0.481
Q02878	RPL6	R.SVFALTN*GIYPHK.L	279	1000	1.16002	0	725.386	2	1.86	2.667	0.302
Q03405	PLAUR	K.GN*STHGCSSEETFLIDCR@.G	222	1000	2.43311	6	693.63	3	0.58	3.564	0.481
Q07954	LRP1	R.FN*STEYQVVTR@.V	446	1000	3.55648	0	676.838	2	0.26	3.358	0.393
Q07954	LRP1	K.WTGHN*VTVVQR@.T	1511	1000	1.56401	0	653.348	2	-0.77	2.759	0.422
Q07954	LRP1	R.MHLN*GSNVQVLHR@.T	3089	73.311	3.02314	0	757.399	2	1.54	4.287	0.261
Q08174	PCDH1	K.AN*DSDQGANAEIEYTFHQAPEVVR.R	305	101.329	0.534607	4	888.74	3	0.34	4.442	0.176
Q08380	LGALS3BP	R.ALGFEN*ATQALGR.A	69	1000	1.29527	7	675.849	2	0.69	2.306	0.421
Q08380	LGALS3BP	R.TVIR@PFYLTN*SSGVD.-	580	1000	0.793251	0	839.438	2	0.55	2.645	0.474
Q08722	CD47	K.GRDIYTFDGALN*K.S	73	1000	2.3365	3	736.867	2	0.14	2.978	0.281
Q08722	CD47	K.SDAVSHTGN*YTCEVTELTR@.E	111	1000	1.96285	3	1074.99	2	1.09	4.396	0.639
Q10589	BST2	R.N*VTHLLQQELTEAQK#.G	65	1000	9.00296	1	881.97	2	0.36	4.728	0.404
Q10589	BST2	K.GFQDVEAQAATCN*HTVMALMASLDAEK#.A	92	1000	1.23358	1	973.781	3	-0.16	3.395	0.295
Q12913	PTPRJ	K.IHVAGETDSSNLN*VSEPR@.A	413	76.733	5.86589	1	645.319	3	-0.98	5.313	0.044
Q12913	PTPRJ	R.NTCTTGITDPPPPDGSPN*ITSVSHNSVK#.V	824	28.218	5.52395	0	968.794	3	0.37	3.137	0.31
Q13200	PSMD2	R.MNLASSFVN*GFVNAAFGQDK#.L	378	59.298	1.23829	2	1064.51	2	-0.48	5.284	0.247
Q13308	PTK7	R.SAN*ASFNIK#.W	116	76.733	1.65766	8	481.75	2	0.11	2.195	0.303
Q13308	PTK7	R.DGTPLSDGQSN*HTVSSK#.E	175	1000	1.89021	6	870.904	2	0.1	3.767	0.612
Q13308	PTK7	R.R@ATVFAN*GSLLLTQVR@PR@.N	283	1000	2.71688	7	674.073	3	-0.68	3.901	0.415
Q13308	PTK7	R.R@QDVN*ITVATVPSWLK#.K	405	1000	0.384818	5	922.521	2	0.06	4.21	0.531
Q13308	PTK7	R.MHIFQN*GSLVIHDVAPEDSGR@.Y	646	1000	1.56152	4	777.718	3	0.39	3.555	0.399
Q13332	PTPRS	R.KVEAEALN*ATAIR.V	733	1000	1.41132	6	694.885	2	0.24	2.809	0.332
Q13421	MSLN	R.K#WN*VTSLETLK#.A	388	1000	3.11569	5	669.381	2	0.82	2.191	0.313
Q13421	MSLN	R.LAFQNMN*GSEYFVK#.I	496	30.835	1.78095	5	829.897	2	0.5	2.6	0.258
Q13433	SLC39A6	R.YGEN*NSLSVEGFR@K#.L	67	24.437	1.49195	0	808.903	2	-0.17	3.259	0.163
Q13433	SLC39A6	R.NTNENPQECFN*ASK#.L	266	71.753	1.29724	0	832.353	2	-0.25	3.662	0.358
Q13433	SLC39A6	K.LLTSHGMGIQVPLN*ATEFNYLCPAIINQIDAR@.S	283	24.632	1.07942	0	1193.62	3	1.03	4.127	0.186
Q13641	TPBG	R.N*LTEVPTDLPAYVR.N	81	1000	0.21828	0	795.917	2	0.19	2.604	0.428
Q13641	TPBG	R.N*LTHLESLHLEDNALK.V	256	148.282	0.537691	0	925.481	2	0.92	3.758	0.381
Q13641	TPBG	K.VLHN*GTLAELQGLPHIR.V	275	1000	1.16712	0	624.351	3	-0.01	3.31	0.332
Q13740	ALCAM	K.DRLNLSEN*YTLSISNAR.I	95	97.748	3.13616	3	984.992	2	-5.21	4.758	0.306
Q13740	ALCAM	K.LGDCISEDSYPDGN*ITWYR.N	167	1000	3.48438	2	1132.49	2	-0.74	3.063	0.643
Q13740	ALCAM	K.NAIK#EGDN*ITLK#.C	265	87.265	0.519808	2	667.873	2	0.29	2.998	0.521
Q13740	ALCAM	K.IIISPEEN*VTLTCTAENQLER.T	480	120.756	3.97747	4	1217.11	2	1.32	4.041	0.545
Q13740	ALCAM	R.TVNSLN*VSANENR@.E	499	53.534	2.68356	0	713.859	2	0.2	3.211	0.323
Q13873	BMPR2	R.ISHEN*GTILCSK#.G	55	1000	1.37664	1	685.343	2	1.73	3.343	0.534
Q14126	DSG2	K.IN*ATDADEPNTLNSK#.I	182	150.768	1.49211	1	807.386	2	1.13	4.253	0.577
Q14126	DSG2	R.YVQN*GTYTVK.I	462	1000	2.7468	0	588.295	2	0.24	2.027	0.334
Q14517	FAT1	K.TGALTVQN*TTQLR@.S	1940	1000	6.41145	0	706.391	2	0.67	2.8	0.343
Q14517	FAT1	R.QVTQEMLN*HTIAIR@.F	3640	1000	2.07563	0	831.945	2	0.54	2.959	0.481
Q15223	PVRL1	R.NPN*GTVTVISR@.Y	202	36.655	1.55863	2	583.821	2	-1.27	2.258	0.351
Q15758	SLC1A5	R.SYSTTYEER@N*ITGTR@.V	212	1000	0.562822	2	896.935	2	-0.04	2.863	0.39
Q16563	SYPL1	K.GQTEIQVNCPPAVTEN*K#.T	71	115.01	1.32148	2	948.462	2	0.78	4.772	0.591
Q24JP5	TMEM132A	R.VQQVGHYPPAN*SSLSSR.S	71	1000	0.885	2	915.456	2	0.91	3.563	0.563
Q29980	MICB	R.AQTLAMN*VTNFWK#.E	164	24.243	1.42341	2	767.889	2	0.54	2.751	0.204
Q29980	MICB	R.QDGVSLSHNTQQWGDVLPDGN*GTYQTWVATR@.I	261	121.502	1.7364	2	1147.21	3	2.47	4.179	0.363
Q29983	MICA	R.AK#PQGQWAEDVLGN*K#.T	79	1000	5.70509	2	553.957	3	0.58	3.456	0.442
Q29983	MICA	R.VCEIHEDN*STR.S	125	1000	2.30114	1	681.797	2	2.08	2.374	0.358
Q29983	MICA	R.SEASEGN*ITVTCR.A	220	1000	2.08688	3	713.822	2	0.53	2.447	0.478
Q29983	MICA	R.QDGVSLSHDTQQWGDVLPDGN*GTYQTWVATR@.I	261	1000	1.00469	3	1147.54	3	0.53	4.727	0.428
Q29983	MICA	R.FTCYMEHSGN*HSTHPVPSGK#.V	289	1000	12.8034	3	762.001	3	0.23	4.013	0.557
Q3MIR4	TMEM30B	R.QGN*YSAGLPR.G	273	1000	2.46476	0	533.264	2	-0.44	1.905	0.351
Q4KMQ2	ANO6	K.NIN*GTDPIQK#.Y	493	19.843	1.28018	3	555.792	2	-0.34	2.038	0.347
Q4KMQ2	ANO6	K.SK#GNPYSDLGN*HTTCR@.Y	802	75.738	1.78602	3	608.619	3	0.84	3.374	0.428
Q5VW38	GPR107	K.VLGQSQEPNVNPASAGN*QTQK.T	169	71.753	0.0904993	3	1085.53	2	-0.23	4.933	0.388
Q5VY80	RAET1L	K.TFLHYDCGN*K#.T	68	1000	1.83077	1	633.284	2	0.55	2.545	0.585
Q5ZPR3	CD276	K.QLVHSFAEGQDQGSAYAN*R@.T	91	1000	0.385165	8	1043.99	2	-0.25	4.435	0.673
Q5ZPR3	CD276	R.TALFPDLLAQGN*ASLR@.L	104	1000	0.69508	8	848.467	2	0.17	2.437	0.367
Q5ZPR3	CD276	R.VVLGAN*GTYSCLVR.N	215	1000	0.540494	6	756.393	2	0.44	3.049	0.614
Q6EMK4	VASN	R.LHEITN*ETFR@.G	117	1000	1.61961	0	634.827	2	0.3	2.941	0.341
Q6H3X3	RAET1G	K.K#LN*VTTAWK#.A	82	1000	0.762522	3	540.32	2	0.17	2.125	0.289
Q6P4F1	FUT10	K.LFHK#PVITLFN*YTATFSR@.H	168	1000	0.515073	5	724.735	3	-1.15	3.398	0.4
Q6PIU2	NCEH1	R.LN*WTSLLPASFTK#.N	287	1000	2.49035	4	744.908	2	1.12	3.419	0.499
Q6UVK1	CSPG4	R.AGQPATAFSQQDLLDGAVLYSHN*GSLSPR@.D	1202	1000	1.27983	0	1003.84	3	0.83	3.9	0.518
Q6UXD5	SEZ6L2	R.LLAN*SSMLGEGQVLR.S	247	1000	0.103834	4	795.924	2	0.48	3.392	0.484
Q6V0I7	FAT4	R.VN*LSEEAPPGSYVSGISATDGDSGLNANLR@.Y	483	49.425	0.489354	1	1000.49	3	0.44	5.064	0.124
Q6V0I7	FAT4	R.IN*VSLLDINDNSPVFYPVQYFAHIK#.E	676	84.609	1.63983	1	973.175	3	-0.55	4.019	0.137
Q6V0I7	FAT4	R.IN*ATTGEIFNK#.Q	2921	132.105	2.27529	2	609.821	2	0.5	2.447	0.421
Q7LGA3	HS2ST1	K.YHVLHIN*TTK.N	108	1000	0.327224	4	410.223	3	-1.29	2.962	0.393
Q7Z4F1	LRP10	R.TSPAN*CTWLILGSK#.E	56	1000	2.12292	1	779.899	2	-0.44	2.403	0.403
Q7Z4F1	LRP10	R.GFN*ATYHVR@.G	299	1000	2.61906	2	537.271	2	-1.02	2.757	0.509
Q7Z5N4	SDK1	R.TN*QSIMVQWQPPPETEHNGVLR.G	782	62.528	0.380021	2	855.42	3	0.09	3.04	0.295
Q7Z6M3	MILR1	K.YDR@EPAEFN*LTK#.K	182	1000	1.22923	1	750.376	2	-0.4	3.057	0.39
Q7Z7H5	TMED4	R.FTFTSHTPGDHQICLHSN*STR.M	117	1000	0.162234	3	612.283	4	0.28	2.595	0.383
Q86SQ4	GPR126	K.ILSN*LSCNVK#.G	324	59.298	0.605689	3	579.812	2	0.14	2.096	0.455
Q8IWA5	SLC44A2	K.GVLM^VGN*ETTYEDGHGSR.K	187	1000	0.509499	4	970.932	2	1.69	2.998	0.579
Q8IWA5	SLC44A2	R.K#N*ITDLVEGAK#.K	200	1000	0.958068	3	603.845	2	2.72	2.056	0.373
Q8IWA5	SLC44A2	K.TCNPETFPSSN*ESR@.Q	417	84.609	0.493065	2	817.85	2	-0.52	3.75	0.609
Q8IWK6	GPR125	R.VLYMFNQMPLN*LTNAVATAR@.Q	433	24.243	0.903909	3	1138.59	2	1.38	4.337	0.263
Q8IZF2	GPR116	K.ANEQVVQSLN*QTYK#.M	256	139.126	2.58677	3	816.914	2	0.68	4.785	0.586
Q8IZF2	GPR116	K.EVLSSN*VSWR@.Y	301	1000	0.509887	2	593.307	2	-1.57	2.072	0.404
Q8IZF2	GPR116	R.YEEQQLEIQN*SSR@.F	315	1000	2.3508	2	816.888	2	-0.38	3.94	0.577
Q8IZF2	GPR116	K.HNFN*ASSVSWCSK#.T	627	48.874	2.20756	4	767.84	2	0.11	3.725	0.251
Q8IZF2	GPR116	K.LNLVPGEN*ITCQDPVIGVGEPGK#.V	666	70.435	2.73616	4	1209.12	2	-1.11	4.696	0.234
Q8N441	FGFRL1	R.SK#PVLTGTHPVN*TTVDFGGTTSFQCK#.V	255	1000	1.29868	0	700.353	4	0.29	3.243	0.319
Q8N441	FGFRL1	R.HN*STIDVGGQK#.F	293	1000	4.86503	0	583.793	2	0.47	2.736	0.525
Q8N8Z6	DCBLD1	K.NYPGTYPN*HTVCEK.T	64	42.565	0.739437	2	841.872	2	-0.09	3.102	0.566
Q8N8Z6	DCBLD1	R.ASSSWQSVN*ESGDQVHWSPGQAR.L	277	1000	0.678138	1	1252.06	2	1.57	5.264	0.586
Q8NBJ4	GOLM1	K.AVLVNN*ITTGER.L	109	24.437	1.35599	2	645.351	2	0.15	2.7	0.108
Q8NBJ5	COLGALT1	R.TALWVATDHNMDN*TSTVLR@.E	96	37.54	1.06585	0	1077.53	2	0.47	4.481	0.197
Q8NC42	RNF149	R.RN*ASAVVLYNEER.Y	131	99.228	0.804827	1	762.387	2	-1.98	3.832	0.48
Q8NFZ8	CADM4	R.WNR@GN*ESLPER@.A	262	37.54	0.452425	0	686.848	2	0.11	2.578	0.091
Q8TBP5	FAM174A	R.GSEGGN*GSNPVAGLETDDHGGK.A	83	23.624	0.160835	0	686.635	3	0.22	2.941	0.271
Q8TE58	ADAMTS15	R.GAEYVISPLPN*ASAPAAQR@.N	141	1000	1.72047	0	961.005	2	0.53	4.253	0.461
Q8TE58	ADAMTS15	K.SFR@EEQCEAFNGYN*HSTNR@.L	591	67.841	1.59953	0	787.679	3	-0.16	5.952	0.268
Q8WVQ1	CANT1	R.LGQAPANWYN*DTYPLSPPQR.T	88	53.534	0.193989	2	1146.05	2	0.37	4.47	0.285
Q92508	PIEZO1	K.HMLALAPN*STAR@.R	2331	1000	1.67557	1	645.844	2	-1.41	2.789	0.486
Q92542	NCSTN	R.TSLELWMHTDPVSQK#N*ESVR@.N	387	1000	2.91269	7	792.064	3	-0.04	4.133	0.556
Q92542	NCSTN	R.R@PN*QSQPLPPSSLQR@.F	417	1000	1.58672	6	860.475	2	0.27	3.921	0.417
Q92542	NCSTN	K.DLYEYSWVQGPLHSN*ETDR@LPR@.C	612	1000	0.563671	3	673.335	4	1.44	3.015	0.323
Q92729	PTPRU	K.LRN*ETYHVFSNLHPGTTYLFSVR.A	548	37.327	1.28895	5	689.352	4	-0.49	3.21	0.311
Q92823	NRCAM	R.ERPPTFLTPEGN*ASNKEELR.G	276	33.657	0.242012	8	763.388	3	3.78	4.193	0.22
Q92854	SEMA4D	R.AAN*YTSSLNLPDK#.T	379	87.265	2.46579	2	702.853	2	0.13	2.965	0.556
Q92859	NEO1	R.TPASDPHGDN*LTYSVFYTK.E	470	1000	0.402972	4	705.997	3	0.33	2.788	0.419
Q92859	NEO1	R.TLSDVPSAAPQN*LSLEVR.N	639	1000	0.318983	4	950.499	2	0.31	3.305	0.519
Q92878	RAD50	K.QIITFFSPLTILVGPN*GAGK#.T	38	1000	1.51404	4	1042.59	2	0.95	4.811	0.546
Q95604	HLA-C	R.GYYN*QSEAGSHTIQR@.M	110	1000	1.75991	0	860.399	2	-0.07	4.486	0.506
Q969P0	IGSF8	R.IGPGEPLELLCN*VSGALPPAGR@.H	327	1000	1.61133	1	1113.59	2	1.02	4.923	0.537
Q96AP7	ESAM	R.LQGVPHVGAN*VTLSCQSPR@.S	169	1000	1.28837	2	1015.03	2	0.18	4.23	0.594
Q96J84	KIRREL	R.IDGGPVILLQAGTPHN*LTCR@.A	140	1000	4.05654	2	714.384	3	0.36	3.836	0.405
Q96J84	KIRREL	K.VGSTN*VSTLVNVHFAPR@.I	297	87.265	5.20266	5	903.988	2	-0.02	3.698	0.466
Q96PD2	DCBLD2	K.YCGLGLQMN*HSIESK#.G	155	1000	2.32576	2	874.411	2	1.06	4.564	0.669
Q96PQ0	SORCS2	R.YVTCAIHN*CSEK#.M	328	1000	1.3256	1	746.83	2	-0.41	3.063	0.61
Q96S52	PIGS	K.TYN*ASVLPVR@.V	370	1000	0.891712	2	564.816	2	0.09	2.483	0.461
Q96T88	UHRF1	R.SYAM^QVNQPLQTVLNQLFPGYGN*GR@.-	791	57.047	1.62557	1	940.804	3	-0.09	4.141	0.305
Q99650	OSMR	K.ILFYNVVVENLDK#PSSSELHSIPAPAN*STK#.L	491	21.606	3.57576	1	822.936	4	0.54	3.362	0.211
Q9BRK3	MXRA8	R.GSPGN*GSSHSGAPGPDPTLAR@.G	306	1000	1.4148	2	964.459	2	0.75	2.276	0.398
Q9BVK6	TMED9	R.FTFTSHTPGEHQICLHSN*STK#.F	125	1000	0.196718	0	814.049	3	0.03	3.725	0.489
Q9BXB1	LGR4	R.TIHLYDNPLSFVGNSAFHN*LSDLHSLVIR@.G	294	21.746	2.31586	1	822.931	4	0.88	5.005	0.219
Q9BY67	CADM1	K.VSLTN*VSISDEGR.Y	113	1000	0.117615	6	690.349	2	-0.01	2.808	0.458
Q9BZR6	RTN4R	R.DLGN*LTHLFLHGNR@.I	179	63.076	3.08026	2	539.289	3	0	3.1	0.249
Q9BZR6	RTN4R	R.VPPGDSPPGN*GSGPR.H	372	1000	1.55622	2	697.333	2	-0.9	2.038	0.442
Q9C0C4	SEMA4C	K.GKNN*QTECFNFIR.F	106	24.437	0.499394	2	815.881	2	0.76	3.051	0.017
Q9C0C4	SEMA4C	R.FLQPYN*ASHLYVCGTYAFQPK.C	121	1000	0.271637	2	836.402	3	-0.99	2.983	0.249
Q9C0H2	TTYH3	R.VWDTAVGLN*HTAEPSLQTLER@.Q	144	1000	1.30572	2	1173.6	2	-0.1	4.213	0.611
Q9H0X4	ITFG3	K.SDPHWESMLN*ATTR@.R	314	1000	0.170217	2	827.38	2	0.32	2.502	0.507
Q9H0X4	ITFG3	R.YKPDTLAVAVEN*GTGTDR.Q	389	1000	0.548476	3	955.473	2	0.21	4.014	0.554
Q9H2A7	CXCL16	K.ELTRPN*ETTIHTAGHSLAAGPEAGENQK.Q	168	91.337	0.374322	0	733.863	4	0.76	3.34	0.311
Q9H5V8	CDCP1	R.IGTFCSN*GTVSR@.I	180	1000	9.122	1	654.316	2	0.46	3.026	0.536
Q9H5V8	CDCP1	R.N*VSGFSIANR@.S	205	139.126	4.67106	2	537.282	2	0.77	2.475	0.267
Q9H5V8	CDCP1	R.ASVSFLNFN*LSNCER@.K	270	30.835	1.95796	2	883.921	2	-0.32	3.856	0.213
Q9H5V8	CDCP1	R.TCSSN*LTLTSGSK#.H	386	1000	5.06742	1	683.828	2	0	2.111	0.37
Q9H813	TMEM206	K.HHYEVIPPLTSPGQPGDMN*CTTQR@.I	148	1000	1.03548	1	915.429	3	-0.76	4.329	0.399
Q9H845	ACAD9	K.VWITN*GGLANIFTVFAK#.T	216	81.692	0.321023	0	931.515	2	2.06	4.129	0.293
Q9HAT2	SIAE	K.HSVLWNAMIHPLCN*MTLK#.G	267	49.418	0.129417	1	726.032	3	-1.1	3.559	0.439
Q9HCU4	CELSR2	R.FGSVLGN*YSCAAQGTQGGSK#.K	1501	1000	0.102589	0	1000.46	2	0.66	4.31	0.615
Q9HD45	TM9SF3	R.IVDVN*LTSEGK#.V	174	1000	0.449206	1	593.321	2	0	2.658	0.415
Q9NPR2	SEMA4B	R.K#IN*SSLQLPDR@.V	405	1000	0.735527	3	644.371	2	0.38	2.591	0.388
Q9NQS3	PVRL3	R.LDGQWPDGLLASDNTLHFVHPLTFN*YSGVYICK#.V	331	32.925	1.34588	3	947.964	4	-1.01	3.931	0.32
Q9NTK5	OLA1	K.GAHN*GQGLGNAFLSHISACDGIFHLTR@.A	102	24.222	2.29987	2	715.604	4	-0.15	4.998	0.045
Q9NV96	TMEM30A	R.YSLN*VTYNYPVHYFDGR.K	294	59.298	1.4289	2	1055.99	2	-0.34	4.475	0.27
Q9NWD8	TMEM248	R.N*VTHLYSTILGHQIGLSGR@.E	132	1000	2.3729	1	692.378	3	-0.87	3.529	0.511
Q9NY35	CLDND1	R.SPVQEN*SSDLNK.S	42	65.44	0.303286	15	660.812	2	0.5	2.89	0.311
Q9NZQ7	CD274	R.R@LDPEEN*HTAELVIPELPLAHPPNER@.T	219	179.741	2.36518	1	751.147	4	-0.04	4.286	0.379
Q9NZU0	FLRT3	K.VFFNLVN*LTELSLVR.N	226	73.311	0.316779	0	884.001	2	1.12	4.552	0.261
Q9P2B2	PTGFRN	K.ELDLTCN*ITTDR.A	300	1000	0.180097	0	727.34	2	0.23	2.067	0.434
Q9P2B2	PTGFRN	K.ENSGYYYCHVSLWAPGHN*R.S	383	84.892	0.331769	0	771.672	3	-1.1	2.736	0.484
Q9P2B2	PTGFRN	R.YSVLIMAEKPVGDLSSPN*ETK.Y	600	1000	0.0533803	0	761.056	3	0.07	3.011	0.42
Q9UBG0	MRC2	R.VTPACN*TSLPAQR@.W	69	1000	4.88159	0	712.364	2	1.8	2.974	0.557
Q9UBG0	MRC2	R.TSN*ISKPGTLER.G	140	1000	7.16417	0	653.349	2	0.84	2.274	0.346
Q9UIW2	PLXNA1	K.LSGN*LTLLR@.A	77	1000	10.5301	1	498.308	2	0.16	2.736	0.453
Q9UIW2	PLXNA1	R.VN*VSEDCPQILPSTQIYVPVGVVK#PITLAAR@.N	701	1000	2.12727	1	1127.62	3	0.22	3.885	0.482
Q9UIW2	PLXNA1	K.YN*YTEDPTILR@.I	1043	1000	2.74427	1	697.345	2	0.19	2.758	0.458
Q9ULF5	SLC39A10	K.DLNEDDHHHECLN*VTQLLK#.Y	339	48.998	1.8474	0	781.033	3	-0.16	3.387	0.414
Q9ULI3	HEG1	R.TFLN*TTVEK#.H	1080	1000	3.55796	0	532.286	2	0.49	1.829	0.342
Q9UMS4	PRPF19	R.TNVANFPGHSGPITSIAFSEN*GYYLATAADDSSVK.L	403	39.016	0.565873	0	1202.24	3	-1.01	5.09	0.289
Q9UN71	PCDHGB4	R.DQGSPALSAN*VSLR.V	543	1000	0.71131	9	709.362	2	-0.36	2.565	0.34
Q9UN76	SLC6A14	R.SPIVTHCN*VSTVNK.G	174	100.207	0.108056	0	779.893	2	0.18	3.879	0.513
Q9UN76	SLC6A14	K.GIQEIIQMN*K.S	189	1000	0.0816643	0	588.813	2	0.12	2.03	0.284
Q9Y4D7	PLXND1	R.RRGN*ISAVAVR.F	155	1000	0.762892	1	401.238	3	-0.27	2.914	0.43
Q9Y4D7	PLXND1	K.INLN*ESMQVVSR@.R	500	48.874	0.693612	2	699.866	2	0.74	3.238	0.245
Q9Y4D7	PLXND1	R.CTLQQDCTN*SSQQHFWTSASEGPSR.C	583	1000	0.778166	2	972.412	3	0.12	3.759	0.602
Q9Y639	NPTN	K.N*ASNMEYR.I	197	42.098	2.86061	7	494.208	2	0.18	1.976	0.467
Q9Y639	NPTN	K.AN*ATIEVK#.A	229	1000	3.9151	7	428.741	2	0.43	2.667	0.233
Q9Y639	NPTN	R.K#K#ENGMPMDIVN*TSGR@.F	284	100.017	3.01833	9	601.308	3	0.17	3.641	0.138
Q9Y6M7	SLC4A7	K.KDN*ITAHNISWR.N	786	84.359	0.351464	13	486.584	3	0.02	3.475	0.377

## Sheet: Description
Column Heading	Description
UniProt name	UniProt symbol of the protein
Gene symbol	Gene symbol for the assigned N-sialoglycoprotein
Sequence	Sequence of the N-sialoglycopeptide obtained by ModScore, *-N-sialoglycosylation site; ^-methionine oxidation; @-heavy isotope labled arginine; #-heavy isotope labled lysine
Site	The quantified N-sialoglycosylation site location, as determined by ModScore
ModScore	Best ModScore matching the indicated N-sialoglycosylation site
Peptide ratio	Peptide ratio between MDA-MB-231 and MCF-7 cells
Redun	Number of proteins to which this sequence may be matched
Obs m/z	Observed mass-to-charge ratio of the indicated peptide
z	Charge state of the peptide
ppm	Mass accuracy of the peptide
XCorr	SEQUEST XCorr
Delta Corr	SEQUEST delta Cn score
