# Supplementary material for: Systematic and site-specific analysis of N-sialoglycosylated proteins on the cell surface by integrating click chemistry and MS-based proteomics
Source: Royal Society of Chemistry journal article supplement (doi:10.1039/c5sc01124h), 2015-01-01
Supplement: c5sc01124h5.xlsx [file c5sc01124h5.xlsx]

## Sheet: Total_sites
Table S12. Identification of 325 unique N-sialoglycosylation sites on 88 CDs
UniProt name	Gene Symbol	CD	Site	ModScore	Sequence	Local sequence	ID_in_HEK	ID_in_SILAC	Annotation
B4DU28	ADAM10	CD156c	236	81.703	R.EGICN*GFTALCPASDPKPN*FTDCNR.H	AREGICNGFTALC	Yes	No	Disintegrin and metalloproteinase domain-containing protein 10 (cDNA FLJ57594, highly similar to ADAM 10 (EC 3.4.24.81) (Adisintegrin and metalloproteinase domain 10))
B4DU28	ADAM10	CD156c	250	14.062	R.EGICN*GFTALCPASDPKPN*FTDCNR.H	ASDPKPNFTDCNR	Yes	No	Disintegrin and metalloproteinase domain-containing protein 10 (cDNA FLJ57594, highly similar to ADAM 10 (EC 3.4.24.81) (Adisintegrin and metalloproteinase domain 10))
O14672	ADAM10	CD156c	537	51.727	R.EGICN*GFTALCPASDPK#PN*FTDCNR@.H	AREGICNGFTALC	No	Yes	ADA10_HUMAN Disintegrin and metalloproteinase domain-containing protein 10
O14672	ADAM10	CD156c	551	14.062	R.EGICN*GFTALCPASDPK#PN*FTDCNR@.H	ASDPKPNFTDCNR	No	Yes	ADA10_HUMAN Disintegrin and metalloproteinase domain-containing protein 10
P78536	ADAM17	CD156B	103	1000	K.VVVVDGKN*ESEYTVK.W	VVVDGKNESEYTV	No	Yes	ADA17_HUMAN Disintegrin and metalloproteinase domain-containing protein 17
P78536	ADAM17	CD156B	551	66.299	K.GVSYCTGN*SSECPPPGNAEDDTVCLDLGK#.C	VSYCTGNSSECPP	No	Yes	ADA17_HUMAN Disintegrin and metalloproteinase domain-containing protein 17
P78536	ADAM17	CD156B	594	44.278	R.EQQLESCACN*ETDNSCK.V	LESCACNETDNSC	No	Yes	ADA17_HUMAN Disintegrin and metalloproteinase domain-containing protein 17
P78325	ADAM8	CD156	436	1000	R.CCN*STTCQLAEGAQCAHGTCCQECK#.V	CRNRCCNSTTCQL	No	Yes	ADAM8_HUMAN Disintegrin and metalloproteinase domain-containing protein 8
F5GXJ9	ALCAM	CD166	44	48.315	R.LNLSEN*YTLSISNAR.I	RLNLSENYTLSIS	Yes	No	CD166 antigen
Q13740	ALCAM	CD166	95	97.748	K.DRLNLSEN*YTLSISNAR.I	RLNLSENYTLSIS	No	Yes	CD166_HUMAN CD166 antigen
Q13740	ALCAM	CD166	167	1000	K.K#LGDCISEDSYPDGN*ITWYR@.N	DSYPDGNITWYRN	No	Yes	CD166_HUMAN CD166 antigen
Q13740	ALCAM	CD166	265	87.265	K.NAIK#EGDN*ITLK#.C	AIKEGDNITLKCL	No	Yes	CD166_HUMAN CD166 antigen
F5GXJ9	ALCAM	CD166	429	65.263	K.IIISPEEN*VTLTCTAENQLER.T	IISPEENVTLTCT	Yes	No	CD166 antigen
F5GXJ9	ALCAM	CD166	448	24.243	R.TVNSLN*VSAISIPEHDEADEISDENR.E	RTVNSLNVSAISI	Yes	No	CD166 antigen
Q13740	ALCAM	CD166	480	120.756	K.IIISPEEN*VTLTCTAENQLER@.T	IISPEENVTLTCT	No	Yes	CD166_HUMAN CD166 antigen
Q13740	ALCAM	CD166	499	37.54	R.TVNSLN*VSAISIPEHDEADEISDENR@EK#.V	RTVNSLNVSAISI	No	Yes	CD166_HUMAN CD166 antigen
B7Z1N7	ATP1B3	CD298	110	1000	K.FLKPYTLEEQKN*LTVCPDGALFEQK.G	TLEEQKNLTVCPD	Yes	No	Sodium/potassium-transporting ATPase subunit beta-3 (cDNA FLJ50753, highly similar to Sodium/potassium-transporting ATPase subunit beta-3)
P54709	ATP1B3	CD298	124	1000	K.FLK#PYTLEEQK#N*LTVCPDGALFEQK#.G	TLEEQKNLTVCPD	No	Yes	AT1B3_HUMAN Sodium/potassium-transporting ATPase subunit beta-3
P54709	ATP1B3	CD298	240	9.34	K.K#LHVGYLQPLVAVQVSFAPN*NTGK#.E	QVSFAPNNTGKEV	Yes	Yes	AT1B3_HUMAN Sodium/potassium-transporting ATPase subunit beta-3
P50895	BCAM	CD239	377	1000	K.VLSLPLN*SSAVVN*CSVHGLPTPALR.W	VLSLPLNSSAVVN	Yes	No	Basal cell adhesion molecule (Auberger B antigen) (B-CAM cell surface glycoprotein) (F8/G253 antigen) (Lutheran antigen) (Lutheran blood group glycoprotein) (CD antigen CD239)
P50895	BCAM	CD239	383	1000	K.VLSLPLN*SSAVVN*CSVHGLPTPALR.W	NSSAVVNCSVHGL	Yes	No	Basal cell adhesion molecule (Auberger B antigen) (B-CAM cell surface glycoprotein) (F8/G253 antigen) (Lutheran antigen) (Lutheran blood group glycoprotein) (CD antigen CD239)
P50895	BCAM	CD239	439	1000	R.TQN*FTLLVQGSPELK#.T	VLSRTQNFTLLVQ	No	Yes	BCAM_HUMAN Basal cell adhesion molecule
I3L192	BSG	CD147	36	1000	K.ILLTCSLN*DSATEVTGHR.W	LLTCSLNDSATEV	Yes	No	Basigin (Fragment)
I3L192	BSG	CD147	144	1000	K.ALMN*GSESR.F	EDKALMNGSESRF	Yes	No	Basigin (Fragment)
P35613	BSG	CD147	160	1000	K.ILLTCSLN*DSATEVTGHR@.W	LLTCSLNDSATEV	No	Yes	BASI_HUMAN Basigin
Q10589	BST2	CD317	65	1000	R.N*VTHLLQQELTEAQK#.G	AVMECRNVTHLLQ	No	Yes	BST2_HUMAN Bone marrow stromal antigen 2
Q10589	BST2	CD317	92	1000	K.GFQDVEAQAATCN*HTVM^ALMASLDAEK#.A	AQAATCNHTVMAL	No	Yes	BST2_HUMAN Bone marrow stromal antigen 2
Q6YHK3	CD109	CD109	419	1000	K.IN*YTVPQSGTFK.I	EAVQKINYTVPQS	Yes	No	CD109 antigen (150 kDa TGF-beta-1-binding protein) (C3 and PZP-like alpha-2-macroglobulin domain-containing protein 7) (Platelet-specific Gov antigen) (p180) (r150) (CD antigen CD109)
Q6YHK3	CD109	CD109	513	62.715	K.QN*STMFSLTPENSWTPK.A	VAVGKQNSTMFSL	No	Yes	CD109_HUMAN CD109 antigen
P48509	CD151	CD151	159	1000	R.YHQPGHEAVTSAVDQLQQEFHCCGSN*N*SQDWR@.D	FHCCGSNNSQDWR	Yes	Yes	CD151_HUMAN CD151 antigen
Q9NZQ7	CD274	CD274	200	48.315	R.IN*TTTNEIFYCTFR@.R	TSTLRINTTTNEI	No	Yes	PD1L1_HUMAN Programmed cell death 1 ligand 1
Q9NZQ7	CD274	CD274	219	179.741	R.R@LDPEEN*HTAELVIPELPLAHPPNER@.T	RLDPEENHTAELV	No	Yes	PD1L1_HUMAN Programmed cell death 1 ligand 1
Q5ZPR3	CD276	CD276	91	1000	K.QLVHSFAEGQDQGSAYAN*R.T	QGSAYANRTALFP	Yes	Yes	CD276_HUMAN CD276 antigen
Q5ZPR3	CD276	CD276	104	1000	R.TALFPDLLAQGN*ASLR@.L	DLLAQGNASLRLQ	Yes	Yes	CD276_HUMAN CD276 antigen
H0YL10	CD276	CD276	106	1000	R.VVLGAN*GTYSCLVR.N	RVVLGANGTYSCL	Yes	No	CD276 antigen (Fragment)
Q5ZPR3	CD276	CD276	215	1000	R.VVLGAN*GTYSCLVR.N	RVVLGANGTYSCL	No	Yes	CD276_HUMAN CD276 antigen
P25942	CD40	CD40	153	1000	K.QIATGVSDTICEPCPVGFFSN#VSSAFEK.C	PVGFFSNVSSAFE	Yes	No	Tumor necrosis factor receptor superfamily member 5 (B-cell surface antigen CD40) (Bp50) (CD40L receptor) (CDw40) (CD antigen CD40)
P25942	CD40	CD40	180	1000	K.DLVVQQAGTN*K#TDVVCGPQDR@.L	VQQAGTNKTDVVC	Yes	Yes	TNR5_HUMAN Tumor necrosis factor receptor superfamily member 5
P16070	CD44	CD44	57	1000	K.AFN*STLPTM^AQMEK#.A	DLCKAFNSTLPTM	Yes	Yes	CD44_HUMAN CD44 antigen
P15529	CD46	CD46	83	1000	K.GYFYIPPLATHTICDR@N*HTWLPVSDDACYR@.E	HTICDRNHTWLPV	Yes	Yes	MCP_HUMAN Membrane cofactor protein
Q08722	CD47	CD47	73	1000	K.GRDIYTFDGALN*K.S	TFDGALNKSTVPT	Yes	Yes	CD47_HUMAN Leukocyte surface antigen CD47
Q08722	CD47	CD47	111	1000	K.SDAVSHTGN*YTCEVTELTR@.E	AVSHTGNYTCEVT	Yes	Yes	CD47_HUMAN Leukocyte surface antigen CD47
P08174	CD55	CD55	95	1000	K.GSQWSDIEEFCN*R.S	DIEEFCNRSCEVP	No	Yes	DAF_HUMAN Complement decay-accelerating factor
B1AMW1	CD58	CD58	195	15.007	K.IQCTLSNPLFN*TTSSIILTTCIPSSGHSR.H	LSNPLFNTTSSII	Yes	No	CD58 antigen, (Lymphocyte function-associated antigen 3), isoform CRA_c (Lymphocyte function-associated antigen 3)
P13987	CD59	CD59	43	1000	K.TAVN*CSSDFDACLITK#.A	DCKTAVNCSSDFD	No	Yes	CD59_HUMAN CD59 glycoprotein
P08962	CD63	CD63	130	0	K.NN*HTASILDR.M	ENYPKNNHTASIL	Yes	Yes	CD63_HUMAN CD63 antigen
P08962	CD63	CD63	150	1000	K.CCGAAN*YTDWEK#.I	KCCGAANYTDWEK	Yes	Yes	CD63_HUMAN CD63 antigen
P08962	CD63	CD63	172	6.603	K.NR@VPDSCCIN*VTVGCGINFNEK#.A	PDSCCINVTVGCG	Yes	Yes	CD63_HUMAN CD63 antigen
P34810	CD68	CD68	199	4.085	R.VMYTTQGGGEAWGISVLNPN#KTK.V	ISVLNPNKTKVQG	Yes	No	Macrosialin (Gp110) (CD antigen CD68)
P04233	CD74	CD74	130	1000	R.MATPLLMQALPMGALPQGPMQN*ATK#.Y	PQGPMQNATKYGN	No	Yes	HG2A_HUMAN HLA class II histocompatibility antigen gamma chain
P04233	CD74	CD74	136	143.502	K.YGN*MTEDHVMHLLQNADPLK#.V	NATKYGNMTEDHV	No	Yes	HG2A_HUMAN HLA class II histocompatibility antigen gamma chain
P27701	CD82	CD82	129	1000	R.DYN*SSR@EDSLQDAWDYVQAQVK#.C	ELIRDYNSSREDS	No	Yes	CD82_HUMAN CD82 antigen
P48960	CD97	CD97	33	1000	R.WCPQN*SSCVN*ATACR@.C	ARWCPQNSSCVNA	No	Yes	CD97_HUMAN CD97 antigen
P48960	CD97	CD97	38	1000	R.WCPQN*SSCVN*ATACR@.C	QNSSCVNATACRC	Yes	Yes	CD97_HUMAN CD97 antigen
P48960	CD97	CD97	108	95.273	K.TFK#N*ESEN*TCQDVDECQQNPR@.L	GAKTFKNESENTC	No	Yes	CD97_HUMAN CD97 antigen
P48960	CD97	CD97	112	101.974	K.TFK#N*ESEN*TCQDVDECQQNPR@.L	FKNESENTCQDVD	No	Yes	CD97_HUMAN CD97 antigen
P48960	CD97	CD97	371	1000	R.GDK#N*VTMGQSSAR@.M	QERGDKNVTMGQS	Yes	Yes	CD97_HUMAN CD97 antigen
P48960	CD97	CD97	453	30.835	R.R@LSAVNSIFLSHN*NTK#.E	SIFLSHNNTKELN	Yes	Yes	CD97_HUMAN CD97 antigen
Q9H5V8	CDCP1	CD318	180	1000	R.IGTFCSN*GTVSR@.I	IGTFCSNGTVSRI	No	Yes	CDCP1_HUMAN CUB domain-containing protein 1
Q9H5V8	CDCP1	CD318	205	1000	R.N*VSGFSIAN*R@.S	PWFHPRNVSGFSI	No	Yes	CDCP1_HUMAN CUB domain-containing protein 1
Q9H5V8	CDCP1	CD318	213	1000	R.N*VSGFSIAN*R@.S	SGFSIANRSSIKR	No	Yes	CDCP1_HUMAN CUB domain-containing protein 1
Q9H5V8	CDCP1	CD318	270	30.835	R.ASVSFLNFN*LSNCER@.K	VSFLNFNLSNCER	No	Yes	CDCP1_HUMAN CUB domain-containing protein 1
Q9H5V8	CDCP1	CD318	386	1000	R.TCSSN*LTLTSGSK#.H	SRTCSSNLTLTSG	No	Yes	CDCP1_HUMAN CUB domain-containing protein 1
A8MWK3	CDH2	CD325	294	8.463	R.IVSQAPSTPSPNMFTINN*ETGDIITVAAGLDR.E	NMFTINNETGDII	Yes	No	Cadherin-2 (cDNA FLJ53252, highly similar to Cadherin-2)
A8MWK3	CDH2	CD325	371	34.326	R.VDIIVAN*LTVTDKDQPHTPAWNAVYR.I	VDIIVANLTVTDK	Yes	No	Cadherin-2 (cDNA FLJ53252, highly similar to Cadherin-2)
A8MWK3	CDH2	CD325	661	11.721	K.FLEAGIYEVPIIITDSGNPPKSN*ISILR.V	GNPPKSNISILRV	Yes	No	Cadherin-2 (cDNA FLJ53252, highly similar to Cadherin-2)
P06731	CEACAM5	CD66e	104	46.016	R.EIIYPN*ASLLIQNIIQN*DTGFYTLHVIK.S	REIIYPNASLLIQ	No	Yes	CEAM5_HUMAN Carcinoembryonic antigen-related cell adhesion molecule 5
P06731	CEACAM5	CD66e	115	11.721	R.EIIYPN*ASLLIQNIIQN*DTGFYTLHVIK.S	IQNIIQNDTGFYT	No	Yes	CEAM5_HUMAN Carcinoembryonic antigen-related cell adhesion molecule 5
P06731	CEACAM5	CD66e	204	1000	R.TLTLFN*VTRN*DTASYK.C	RTLTLFNVTRNDT	No	Yes	CEAM5_HUMAN Carcinoembryonic antigen-related cell adhesion molecule 5
P06731	CEACAM5	CD66e	208	1000	R.TLTLFN*VTRN*DTASYK.C	LFNVTRNDTASYK	No	Yes	CEAM5_HUMAN Carcinoembryonic antigen-related cell adhesion molecule 5
P06731	CEACAM5	CD66e	480	30.835	K.NSGLYTCQAN*NSASGHSR.T	LYTCQANNSASGH	No	Yes	CEAM5_HUMAN Carcinoembryonic antigen-related cell adhesion molecule 5
P06731	CEACAM5	CD66e	580	65.44	R.AYVCGIQNSVSAN*R.S	QNSVSANRSDPVT	No	Yes	CEAM5_HUMAN Carcinoembryonic antigen-related cell adhesion molecule 5
P40199	CEACAM6	CD66c	224	43.066	K.RNDAGSYECEIQNPASAN*R.S	QNPASANRSDPVT	No	Yes	CEAM6_HUMAN Carcinoembryonic antigen-related cell adhesion molecule 6
Q07075	ENPEP	CD249	324	1000	K.HTAEYAAN*ITK.S	TAEYAANITKSVF	Yes	No	Glutamyl aminopeptidase (EAP) (EC 3.4.11.7) (Aminopeptidase A) (AP-A) (Differentiation antigen gp160) (CD antigen CD249)
P04626	ERBB2	CD340	187	122.154	K.NNQLALTLIDTN*R@.S	LTLIDTNRSRACH	No	Yes	ERBB2_HUMAN Receptor tyrosine-protein kinase erbB-2
B4DTR1	ERBB2	CD340	254	1000	R.GHCWGPGPTQCVN*CSQFLR.G	GPTQCVNCSQFLR	Yes	No	Receptor tyrosine-protein kinase erbB-2 (cDNA FLJ59426, highly similar to Receptor tyrosine-protein kinase erbB-2 (EC 2.7.10.1))
B4DTR1	ERBB2	CD340	295	1000	R.HCLPCHPECQPQN#GSVTCFGPEADQCVACAHYK.D	PECQPQNGSVTCF	Yes	No	Receptor tyrosine-protein kinase erbB-2 (cDNA FLJ59426, highly similar to Receptor tyrosine-protein kinase erbB-2 (EC 2.7.10.1))
B4DTR1	ERBB2	CD340	353	1000	K.FPDEEGACQPCPIN#CTHSCVDLDDKGCPAEQR.A	CQPCPINCTHSCV	Yes	No	Receptor tyrosine-protein kinase erbB-2 (cDNA FLJ59426, highly similar to Receptor tyrosine-protein kinase erbB-2 (EC 2.7.10.1))
P04626	ERBB2	CD340	530	1000	R.GHCWGPGPTQCVN*CSQFLR@.G	GPTQCVNCSQFLR	No	Yes	ERBB2_HUMAN Receptor tyrosine-protein kinase erbB-2
P04626	ERBB2	CD340	629	1000	K.FPDEEGACQPCPIN*CTHSCVDLDDK#GCPAEQR@.A	CQPCPINCTHSCV	No	Yes	ERBB2_HUMAN Receptor tyrosine-protein kinase erbB-2
P13726	F3	CD142	156	1000	K.VN*VTVEDER@.T	QVGTKVNVTVEDE	No	Yes	TF_HUMAN Tissue factor
P13726	F3	CD142	169	24.437	R.R@N*NTFLSLR@.D	RTLVRRNNTFLSL	No	Yes	TF_HUMAN Tissue factor
H7C5Z8	FAS	CD95	118	1000	R.LCDEGHGLEVEIN#CTR.T	GLEVEINCTRTQN	Yes	No	Tumor necrosis factor receptor superfamily member 6
H7C5Z8	FAS	CD95	136	19.846	R.CKPNFFCN*STVCEHCDPCTK.C	KPNFFCNSTVCEH	Yes	No	Tumor necrosis factor receptor superfamily member 6
E7EU09	FGFR1	CD331	173	1000	R.SPHRPILQAGLPAN*K.T	QAGLPANKTVALG	Yes	No	Fibroblast growth factor receptor (EC 2.7.10.1)
F8W9L4	FGFR3	CD333	262	1000	R.SPHRPILQAGLPAN*QTAVLGSDVEFHCK.V	QAGLPANQTAVLG	Yes	No	Fibroblast growth factor receptor (EC 2.7.10.1)
P19440	GGT1	CD224	120	1000	R.LAFATMFN*SSEQSQK#.G	AFATMFNSSEQSQ	No	Yes	GGT1_HUMAN Gamma-glutamyltranspeptidase 1
P05362	ICAM1	CD54	183	1000	R.DHHGAN*FSCR@.T	RDHHGANFSCRTE	No	Yes	ICAM1_HUMAN Intercellular adhesion molecule 1
P05362	ICAM1	CD54	267	64.398	R.LNPTVTYGN*DSFSAK.A	PTVTYGNDSFSAK	No	Yes	ICAM1_HUMAN Intercellular adhesion molecule 1
P13598	ICAM2	CD102	82	1000	K.HYLVSN*ISHDTVLQCHFTCSGK#.Q	KHYLVSNISHDTV	No	Yes	ICAM2_HUMAN Intercellular adhesion molecule 2
P13598	ICAM2	CD102	105	17.009	K.QESMNSN*VSVYQPPR@.Q	QESMNSNVSVYQP	No	Yes	ICAM2_HUMAN Intercellular adhesion molecule 2
P13598	ICAM2	CD102	153	1000	R.GN*ETLHYETFGK#.A	LFLFRGNETLHYE	No	Yes	ICAM2_HUMAN Intercellular adhesion molecule 2
P13598	ICAM2	CD102	176	1000	K.AAPAPQEATATFN*STADR@.E	EATATFNSTADRE	No	Yes	ICAM2_HUMAN Intercellular adhesion molecule 2
O75144	ICOSLG	CD275	70	30.612	K.TVVTYHIPQN*SSLENVDSR.Y	TYHIPQNSSLENV	Yes	Yes	ICOSL_HUMAN ICOS ligand
K4DIA0	ICOSLG	CD275	102	1000	R.LFN#VTPQDEQK.F	FSLRLFNVTPQDE	Yes	No	ICOS ligand (Inducible T-cell co-stimulator ligand, isoform CRA_b)
F5H5M7	IFNGR1	CD119	151	1000	R.MN#GSEIQYK.I	NVYVRMNGSEIQY	Yes	No	Interferon gamma receptor 1
P08069	IGF1R	CD221	244	92.247	R.ACTENNECCHPECLGSCSAPDN*DTACVACR.H	SCSAPDNDTACVA	Yes	Yes	IGF1R_HUMAN Insulin-like growth factor 1 receptor
C9J5X1	IGF1R	CD221	314	1000	R.N#GSQSMYCIPCEGPCPK.V	PSGFIRNGSQSMY	Yes	No	Tyrosine-protein kinase receptor (EC 2.7.10.1)
P08069	IGF1R	CD221	607	1000	R.TN*ASVPSIPLDVLSASN*SSSQLIVK.W	ILYIRTNASVPSI	Yes	Yes	IGF1R_HUMAN Insulin-like growth factor 1 receptor
P08069	IGF1R	CD221	622	1000	R.TN*ASVPSIPLDVLSASN*SSSQLIVK.W	DVLSASNSSSQLI	Yes	Yes	IGF1R_HUMAN Insulin-like growth factor 1 receptor
P08069	IGF1R	CD221	640	6.591	K.WNPPSLPNGN*LSYYIVR.W	PSLPNGNLSYYIV	Yes	Yes	IGF1R_HUMAN Insulin-like growth factor 1 receptor
P08069	IGF1R	CD221	747	1000	R.DVMQVAN*TTMSSR.S	DVMQVANTTMSSR	Yes	Yes	IGF1R_HUMAN Insulin-like growth factor 1 receptor
P08069	IGF1R	CD221	756	1000	R.SRN*TTAADTYN*ITDPEELETEYPFFESR.V	MSSRSRNTTAADT	No	Yes	IGF1R_HUMAN Insulin-like growth factor 1 receptor
P08069	IGF1R	CD221	764	1000	R.SRN*TTAADTYN*ITDPEELETEYPFFESR.V	TAADTYNITDPEE	No	Yes	IGF1R_HUMAN Insulin-like growth factor 1 receptor
C9J5X1	IGF1R	CD221	913	1000	R.IQATSLSGN*GSWTDPVFFYVQAK.R	ATSLSGNGSWTDP	Yes	No	Tyrosine-protein kinase receptor (EC 2.7.10.1)
P11717	IGF2R	CD222	435	20.167	R.MSVINFECN*K#.T	VINFECNKTAGND	Yes	Yes	MPRI_HUMAN Cation-independent mannose-6-phosphate receptor
P11717	IGF2R	CD222	581	1000	K.TN*ITLVCKPGDLESAPVLR.T	GKKIKTNITLVCK	Yes	No	Cation-independent mannose-6-phosphate receptor (CI Man-6-P receptor) (CI-MPR) (M6PR) (300 kDa mannose 6-phosphate receptor) (MPR 300) (Insulin-like growth factor 2 receptor) (Insulin-like growth factor II receptor) (IGF-II receptor) (M6P/IGF2 receptor) (M6P/IGF2R) (CD antigen CD222)
P11717	IGF2R	CD222	1246	69.812	R.HGNLYDLKPLGLN*DTIVSAGEYTYYFR.V	LKPLGLNDTIVSA	Yes	No	Cation-independent mannose-6-phosphate receptor (CI Man-6-P receptor) (CI-MPR) (M6PR) (300 kDa mannose 6-phosphate receptor) (MPR 300) (Insulin-like growth factor 2 receptor) (Insulin-like growth factor II receptor) (IGF-II receptor) (M6P/IGF2 receptor) (M6P/IGF2R) (CD antigen CD222)
P11717	IGF2R	CD222	1757	1000	K.HFN*YTSLIAFHCK#.R	LADKHFNYTSLIA	Yes	Yes	MPRI_HUMAN Cation-independent mannose-6-phosphate receptor
P11717	IGF2R	CD222	2136	9.394	R.AACAVKPQEVQM^VN*GTITNPINGK.S	QEVQMVNGTITNP	Yes	No	Cation-independent mannose-6-phosphate receptor (CI Man-6-P receptor) (CI-MPR) (M6PR) (300 kDa mannose 6-phosphate receptor) (MPR 300) (Insulin-like growth factor 2 receptor) (Insulin-like growth factor II receptor) (IGF-II receptor) (M6P/IGF2 receptor) (M6P/IGF2R) (CD antigen CD222)
C9J8Z4	IGSF8	CD316	50	48.532	R.VAGTAVSISCN#VTGYEGPAQQNFEWFLYRPEAPDTALGIVSTK.D	AVSISCNVTGYEG	Yes	No	Immunoglobulin superfamily member 8 (Fragment)
Q969P0	IGSF8	CD316	327	1000	R.IGPGEPLELLCN*VSGALPPAGR@.H	PLELLCNVSGALP	Yes	Yes	IGSF8_HUMAN Immunoglobulin superfamily member 8
Q969P0	IGSF8	CD316	463	1000	R.GETASLLCN*ISVR.G	TASLLCNISVRGG	Yes	No	Immunoglobulin superfamily member 8 (IgSF8) (CD81 partner 3) (Glu-Trp-Ile EWI motif-containing protein 2) (EWI-2) (Keratinocytes-associated transmembrane protein 4) (KCT-4) (LIR-D1) (Prostaglandin regulatory-like protein) (PGRL) (CD antigen CD316)
P78552	IL13RA1	CD213a1	105	1000	R.ICLQVGSQCSTN#ESEKPSILVEK.C	GSQCSTNESEKPS	Yes	No	Interleukin-13 receptor subunit alpha-1 (IL-13 receptor subunit alpha-1) (IL-13R subunit alpha-1) (IL-13R-alpha-1) (IL-13RA1) (Cancer/testis antigen 19) (CT19) (CD antigen CD213a1)
Q96F46	IL17RA	CD217	49	1000	R.ALVCSQPGLN#CTVK.N	CSQPGLNCTVKNS	Yes	No	Interleukin-17 receptor A (IL-17 receptor A) (IL-17RA) (CDw217) (CD antigen CD217)
Q96F46	IL17RA	CD217	206	1000	K.VTTPCMSSGSLWDPN#ITVETLEAHQLR.V	GSLWDPNITVETL	Yes	No	Interleukin-17 receptor A (IL-17 receptor A) (IL-17RA) (CDw217) (CD antigen CD217)
D6RH03	IL6ST	CD130	83	1000	K.EQYTIIN#R.T	EQYTIINRTASSV	Yes	No	Interleukin-6 receptor subunit beta
P40189	IL6ST	CD130	157	1000	R.ETHLETN*FTLK#.S	ETHLETNFTLKSE	No	Yes	IL6RB_HUMAN Interleukin-6 receptor subunit beta
P40189	IL6ST	CD130	227	12.431	K.VKPNPPHN*LSVINSEELSSILK.L	KPNPPHNLSVINS	Yes	Yes	IL6RB_HUMAN Interleukin-6 receptor subunit beta
P40189	IL6ST	CD130	379	1000	K.SHLQN*YTVN*ATK#.L	WKSHLQNYTVNAT	Yes	Yes	IL6RB_HUMAN Interleukin-6 receptor subunit beta
P40189	IL6ST	CD130	383	1000	K.SHLQN*YTVN*ATK#.L	LQNYTVNATKLTV	Yes	Yes	IL6RB_HUMAN Interleukin-6 receptor subunit beta
P40189	IL6ST	CD130	390	37.54	K.LTVN*LTNDR@.Y	ATKLTVNLTNDRY	Yes	Yes	IL6RB_HUMAN Interleukin-6 receptor subunit beta
M0R3E6	INSR	CD220	116	1000	K.WKPPSDPN#GN#ITHYLVFWER.Q	KPPSDPNGNITHY	Yes	No	Insulin receptor (Fragment)
M0R3E6	INSR	CD220	118	1000	K.WKPPSDPN#GN#ITHYLVFWER.Q	PSDPNGNITHYLV	Yes	No	Insulin receptor (Fragment)
P06213	INSR	CD220	282	1000	R.CVN*FSFCQDLHHK.C	QDWRCVNFSFCQD	Yes	No	Insulin receptor (IR) (EC 2.7.10.1) (CD antigen CD220) [Cleaved into: Insulin receptor subunit alpha; Insulin receptor subunit beta]
P06213	INSR	CD220	322	2.806	K.CIPECPSGYTM*N#SSNLLCTPCLGPCPK.V	PSGYTMNSSNLLC	Yes	No	Insulin receptor (IR) (EC 2.7.10.1) (CD antigen CD220) [Cleaved into: Insulin receptor subunit alpha; Insulin receptor subunit beta]
P06213	INSR	CD220	424	58.433	R.GETLEIGN#YSFYALDNQNLR.Q	ETLEIGNYSFYAL	Yes	No	Insulin receptor (IR) (EC 2.7.10.1) (CD antigen CD220) [Cleaved into: Insulin receptor subunit alpha; Insulin receptor subunit beta]
P06213	INSR	CD220	445	1000	K.HN*LTITQGK#.L	WDWSKHNLTITQG	Yes	Yes	INSR_HUMAN Insulin receptor
P06213	INSR	CD220	698	1000	R.TWSPPFESEDSQK#HN*QSEYEDSAGECCSCPK#.T	EDSQKHNQSEYED	Yes	Yes	INSR_HUMAN Insulin receptor
P06213	INSR	CD220	920	1000	R.GLSPGN*YSVR.I	RGLSPGNYSVRIR	Yes	No	Insulin receptor (IR) (EC 2.7.10.1) (CD antigen CD220) [Cleaved into: Insulin receptor subunit alpha; Insulin receptor subunit beta]
P61565	ITGA1	CD49a	99	8.88	K.YLENTKVTQTPESMLLAALMIVSM*VVSLPM*PAGAAAAN#YTNWAYVPFPPLIR.A	AGAAAANYTNWAY	Yes	No	IMPA3_HUMAN Inositol monophosphatase 3
P56199	ITGA1	CD49a	100	9.558	K.LDLPVN#TSIPN#VTEVKENMTFGSTLVTN#PNGGFLACGPLYAYR.C	KLDLPVNTSIPNV	Yes	No	Integrin alpha-1 (CD49 antigen-like family member A) (Laminin and collagen receptor) (VLA-1) (CD antigen CD49a)
P56199	ITGA1	CD49a	105	12.497	K.LDLPVN#TSIPN#VTEVKENMTFGSTLVTN#PNGGFLACGPLYAYR.C	VNTSIPNVTEVKE	Yes	No	Integrin alpha-1 (CD49 antigen-like family member A) (Laminin and collagen receptor) (VLA-1) (CD antigen CD49a)
P56199	ITGA1	CD49a	112	13.326	K.LDLPVNTSIPN#VTEVKEN#MTFGSTLVTNPNGGFLACGPLYAYR.C	VTEVKENMTFGST	Yes	No	Integrin alpha-1 (CD49 antigen-like family member A) (Laminin and collagen receptor) (VLA-1) (CD antigen CD49a)
P56199	ITGA1	CD49a	217	6.591	K.QTQVGIVQYGEN*VTHEFNLNK#.Y	IVQYGENVTHEFN	Yes	Yes	ITA1_HUMAN Integrin alpha-1
P56199	ITGA1	CD49a	532	1000	K.VYVYALN*QTR@.F	VYVYALNQTRFEY	Yes	Yes	ITA1_HUMAN Integrin alpha-1
P56199	ITGA1	CD49a	840	18.805	R.SQNDKFN*VSLTVK.N	SQNDKFNVSLTVK	Yes	No	Integrin alpha-1 (CD49 antigen-like family member A) (Laminin and collagen receptor) (VLA-1) (CD antigen CD49a)
P17301	ITGA2	CD49b	105	143.484	K.LNLQTSTSIPN*VTEMK#.T	TSTSIPNVTEMKT	Yes	Yes	ITA2_HUMAN Integrin alpha-2
P17301	ITGA2	CD49b	343	1000	R.YFFN*VSDEAALLEK#.A	TERYFFNVSDEAA	Yes	Yes	ITA2_HUMAN Integrin alpha-2
P17301	ITGA2	CD49b	460	121.092	R.AN*YTGQIVLYSVNENGN*ITVIQAHR@.G	AGAPRANYTGQIV	Yes	Yes	ITA2_HUMAN Integrin alpha-2
P17301	ITGA2	CD49b	475	20.167	R.AN*YTGQIVLYSVNENGN*ITVIQAHR@.G	SVNENGNITVIQA	Yes	Yes	ITA2_HUMAN Integrin alpha-2
P17301	ITGA2	CD49b	1057	1000	R.TASCSN*VTCWLK#.D	RTASCSNVTCWLK	Yes	Yes	ITA2_HUMAN Integrin alpha-2
B4DDT0	ITGA3	CD49c	40	1000	K.N#ITIVTGAPR.H	FILHPKNITIVTG	Yes	No	Integrin alpha-3 (cDNA FLJ59664, highly similar to Integrin alpha-3)
H0YA49	ITGA3	CD49c	76	7.455	R.SGEDAHEALLTLVVPPALLLSSVRPPGACQAN#ETIFCELGNPFKR.N	PGACQANETIFCE	Yes	No	Integrin alpha-3 (Fragment)
P26006	ITGA3	CD49c	86	1000	R.ELAVPDGYTN*R@.T	VPDGYTNRTGAVY	No	Yes	ITA3_HUMAN Integrin alpha-3
P26006	ITGA3	CD49c	107	1000	K.DDCER@MN*ITVK#.N	DDCERMNITVKND	Yes	Yes	ITA3_HUMAN Integrin alpha-3
P26006	ITGA3	CD49c	265	1000	K.N*ITIVTGAPR@.H	FILHPKNITIVTG	No	Yes	ITA3_HUMAN Integrin alpha-3
P26006	ITGA3	CD49c	511	1000	R.R@N*ITLAYTLEADR@DR@.R	NPNYRRNITLAYT	Yes	Yes	ITA3_HUMAN Integrin alpha-3
P26006	ITGA3	CD49c	573	1000	K.LR@PIIISM^N*YSLPLR@.M	PIIISMNYSLPLR	No	Yes	ITA3_HUMAN Integrin alpha-3
P26006	ITGA3	CD49c	605	29.667	R.SLDAYPILNQAQALEN*HTEVQFQK#.E	QAQALENHTEVQF	No	Yes	ITA3_HUMAN Integrin alpha-3
P26006	ITGA3	CD49c	656	73.311	K.LLLSIN*VTNTR@.T	KLLLSINVTNTRT	No	Yes	ITA3_HUMAN Integrin alpha-3
P26006	ITGA3	CD49c	697	22.329	R.SGEDAHEALLTLVVPPALLLSSVR@PPGACQAN*ETIFCELGNPFK#R@.N	PGACQANETIFCE	No	Yes	ITA3_HUMAN Integrin alpha-3
P26006	ITGA3	CD49c	926	1000	R.AHCVWLECPIPDAPVVTN*VTVK#.A	DAPVVTNVTVKAR	Yes	Yes	ITA3_HUMAN Integrin alpha-3
P26006	ITGA3	CD49c	969	5.085	R.TSIPTINMEN*K#.T	PTINMENKTTWFS	No	Yes	ITA3_HUMAN Integrin alpha-3
E7EP60	ITGA4	CD49d	79	44.278	R.WLLVGAPTANWLAN*ASVINPGAIYR.C	TANWLANASVINP	Yes	No	Integrin alpha-4 (Fragment)
E7EP60	ITGA4	CD49d	138	1000	R.QPGEN#GSIVTCGHR.W	SRQPGENGSIVTC	Yes	No	Integrin alpha-4 (Fragment)
E7EP60	ITGA4	CD49d	480	1000	R.TRPVVIVDASLSHPESVN*R.T	SHPESVNRTKFDC	Yes	No	Integrin alpha-4 (Fragment)
P13612	ITGA4	CD49d	626	1000	R.FCAHEN#CSADLQVSAK.I	RFCAHENCSADLQ	Yes	No	Integrin alpha-4 (CD49 antigen-like family member D) (Integrin alpha-IV) (VLA-4 subunit alpha) (CD antigen CD49d)
P13612	ITGA4	CD49d	645	1000	K.IGFLKPHEN*K.T	FLKPHENKTYLAV	Yes	No	Integrin alpha-4 (CD49 antigen-like family member D) (Integrin alpha-IV) (VLA-4 subunit alpha) (CD antigen CD49d)
H0YHL9	ITGA5	CD49e	61	1000	K.AN#TSQPGVLQGGAVYLCPWGASPTQCTPIEFDSK.G	VGAPKANTSQPGV	Yes	No	Integrin alpha-5 light chain (Fragment)
P08648	ITGA5	CD49e	182	1000	R.TEK#EPLSDPVGTCYLSTDN*FTR@.I	CYLSTDNFTRILE	Yes	Yes	ITA5_HUMAN Integrin alpha-5
P08648	ITGA5	CD49e	297	1000	K.GN*LTYGYVTILN*GSDIR@.S	AGVPKGNLTYGYV	Yes	Yes	ITA5_HUMAN Integrin alpha-5
P08648	ITGA5	CD49e	307	1000	K.GN*LTYGYVTILN*GSDIR@.S	GYVTILNGSDIRS	Yes	Yes	ITA5_HUMAN Integrin alpha-5
P08648	ITGA5	CD49e	675	30.835	K.NALN*LTFHAQNVGEGGAYEAELR@.V	GDKNALNLTFHAQ	Yes	Yes	ITA5_HUMAN Integrin alpha-5
P08648	ITGA5	CD49e	712	1000	R.HPGN*FSSLSCDYFAVN*QSR@.L	LVRHPGNFSSLSC	Yes	Yes	ITA5_HUMAN Integrin alpha-5
P08648	ITGA5	CD49e	724	1000	R.HPGN*FSSLSCDYFAVN*QSR@.L	CDYFAVNQSRLLV	Yes	Yes	ITA5_HUMAN Integrin alpha-5
P08648	ITGA5	CD49e	773	9.34	K.NLN*NSQSDVVSFR@.L	ILSKNLNNSQSDV	Yes	Yes	ITA5_HUMAN Integrin alpha-5
P08648	ITGA5	CD49e	868	31.275	R.VTGLN*CTTNHPINPK#.G	TRVTGLNCTTNHP	Yes	Yes	ITA5_HUMAN Integrin alpha-5
H7BZ97	ITGA6	CD49f	94	27.121	R.KYQTLN*CSVNVNCVNIR.C	RKYQTLNCSVNVN	Yes	No	Integrin alpha-6 heavy chain (Fragment)
C9JXX7	ITGA6	CD49f	109	4.691	R.VEQKNNTFFDMN#IFEDGPYEVGGETEHDESLVPVPANSYLGFSLDSGK.G	VRVEQKNNTFFDM	Yes	No	Integrin alpha-6 heavy chain (Fragment)
C9JXX7	ITGA6	CD49f	170	1000	R.AN*HSGAVVLLK.R	SGAPRANHSGAVV	Yes	No	Integrin alpha-6 heavy chain (Fragment)
P23229	ITGA6	CD49f	770	30.835	K.QLSCVANQN*GSQADCELGNPFK#.R	SCVANQNGSQADC	Yes	Yes	ITA6_HUMAN Integrin alpha-6
P23229	ITGA6	CD49f	930	24.243	K.EINSLN*LTESHNSR@K#.K	KEINSLNLTESHN	No	Yes	ITA6_HUMAN Integrin alpha-6
H7BZG1	ITGAV	CD51	25	1000	K.ISSLQTTEKN*DTVAGQGER.D	LQTTEKNDTVAGQ	Yes	No	Integrin alpha-V light chain (Fragment)
P06756	ITGAV	CD51	74	1000	K.AN*TTQPGIVEGGQVLK#.C	VGAPKANTTQPGI	Yes	Yes	ITAV_HUMAN Integrin alpha-V
H7BZG1	ITGAV	CD51	96	0	K.SLLWTETFMNKENQN#HSYSLK.S	MNKENQNHSYSLK	Yes	No	Integrin alpha-V light chain (Fragment)
P06756	ITGAV	CD51	488	0	R.ARPVITVNAGLEVYPSILNQDN#KTCSLPGTALK.V	SILNQDNKTCSLP	Yes	No	Integrin alpha-V (Vitronectin receptor subunit alpha) (CD antigen CD51) [Cleaved into: Integrin alpha-V heavy chain; Integrin alpha-V light chain]
P06756	ITGAV	CD51	554	1000	R.SPSHSKN#MTISR.G	SPSHSKNMTISRG	Yes	No	Integrin alpha-V (Vitronectin receptor subunit alpha) (CD antigen CD51) [Cleaved into: Integrin alpha-V heavy chain; Integrin alpha-V light chain]
P06756	ITGAV	CD51	835	0	K.YNN*NTLLYILHYDIDGPMN*CTSDMEINPLR@.I	WPYKYNNNTLLYI	Yes	Yes	ITAV_HUMAN Integrin alpha-V
P06756	ITGAV	CD51	851	56.122	K.YNN*NTLLYILHYDIDGPMN*CTSDMEINPLR@.I	DIDGPMNCTSDME	Yes	Yes	ITAV_HUMAN Integrin alpha-V
P06756	ITGAV	CD51	874	1000	K.ISSLQTTEKN*DTVAGQGERDHLITK.R	LQTTEKNDTVAGQ	No	Yes	ITAV_HUMAN Integrin alpha-V
H7C4N8	ITGB1	CD29	11	11.22	R.KEN*SSEICSNNGECVCGQCVCR.K	AYCRKENSSEICS	Yes	No	Integrin beta-1 (Fragment)
H7C4N8	ITGB1	CD29	19	48.874	R.KEN#SSEICSNN#GECVCGQCVCR.K	SEICSNNGECVCG	Yes	No	Integrin beta-1 (Fragment)
P05556	ITGB1	CD29	50	28.218	K.SCGECIQAGPNCGWCTN*STFLQEGMPTSAR@.C	NCGWCTNSTFLQE	Yes	Yes	ITB1_HUMAN Integrin beta-1
P05556	ITGB1	CD29	212	123.857	R.NPCTSEQN*CTSPFSYK#.N	PCTSEQNCTSPFS	Yes	Yes	ITB1_HUMAN Integrin beta-1
P05556	ITGB1	CD29	406	38.189	K.NGVN#GTGEN#GRK.C	YCKNGVNGTGENG	Yes	No	Integrin beta-1 (Fibronectin receptor subunit beta) (Glycoprotein IIa) (GPIIA) (VLA-4 subunit beta) (CD antigen CD29)
P05556	ITGB1	CD29	411	52.255	K.NGVN#GTGEN#GRK.C	VNGTGENGRKCSN	Yes	No	Integrin beta-1 (Fibronectin receptor subunit beta) (Glycoprotein IIa) (GPIIA) (VLA-4 subunit beta) (CD antigen CD29)
P05556	ITGB1	CD29	481	1000	K.CHEGN*GTFECGACR@.C	PKCHEGNGTFECG	Yes	Yes	ITB1_HUMAN Integrin beta-1
P05556	ITGB1	CD29	520	100.742	R.KEN*SSEICSNNGECVCGQCVCR.K	AYCRKENSSEICS	Yes	Yes	ITB1_HUMAN Integrin beta-1
P05556	ITGB1	CD29	669	1000	K.DTCTQECSYFN*ITK#.V	QECSYFNITKVES	Yes	Yes	ITB1_HUMAN Integrin beta-1
P16144	ITGB4	CD104	327	171.488	K.HNIIPIFAVTN*YSYSYYEK#.L	PIFAVTNYSYSYY	No	Yes	ITB4_HUMAN Integrin beta-4
P16144	ITGB4	CD104	695	1000	R.CSFR@DEDDDCTYSYTMEGDGAPGPN*STVLVHK#.K	DGAPGPNSTVLVH	No	Yes	ITB4_HUMAN Integrin beta-4
A8MQ45	JAM2	CD322	187	57.711	R.LGSQSTN*SSYTMNTK.T	LGSQSTNSSYTMN	Yes	No	Junctional adhesion molecule B
P10721	KIT	CD117	130	1000	R.SLYGKEDN#DTLVR.C	LYGKEDNDTLVRC	Yes	No	Mast/stem cell growth factor receptor Kit (SCFR) (EC 2.7.10.1) (Piebald trait protein) (PBT) (Proto-oncogene c-Kit) (Tyrosine-protein kinase Kit) (p145 c-kit) (v-kit Hardy-Zuckerman 4 feline sarcoma viral oncogene homolog) (CD antigen CD117)
P32004	L1CAM	CD171	100	7.71	K.EELGVTVYQSPHSGSFTITGN*NSNFAQR@.F	SFTITGNNSNFAQ	No	Yes	L1CAM_HUMAN Neural cell adhesion molecule L1
P32004	L1CAM	CD171	203	30.612	R.VTMGQNGNLYFANVLTSDN*HSDYICHAHFPGTR@.T	NVLTSDNHSDYIC	No	Yes	L1CAM_HUMAN Neural cell adhesion molecule L1
P32004	L1CAM	CD171	247	1000	R.LLFPTN*SSSHLVALQGQPLVLECIAEGFPTPTIK#.W	RLLFPTNSSSHLV	No	Yes	L1CAM_HUMAN Neural cell adhesion molecule L1
P32004	L1CAM	CD171	479	1000	R.FFPYAN*GTLGIR@.D	RFFPYANGTLGIR	No	Yes	L1CAM_HUMAN Neural cell adhesion molecule L1
P32004	L1CAM	CD171	671	1000	K.VPGN*QTSTTLK#.L	LGKVPGNQTSTTL	No	Yes	L1CAM_HUMAN Neural cell adhesion molecule L1
F5H025	L1CAM	CD171	673	1000	K.VPGN#QTSTTLK.L	LGKVPGNQTSTTL	Yes	No	Neural cell adhesion molecule L1
P32004	L1CAM	CD171	726	71.067	K.NPVDVK#GEGN*ETTNMVITWK#PLR@.W	DVKGEGNETTNMV	No	Yes	L1CAM_HUMAN Neural cell adhesion molecule L1
F5H025	L1CAM	CD171	728	1.65	K.YGPGEPSPVSETVVTPEAAPEKNPVDVKGEGN#ETTNMVITWKPLR.W	DVKGEGNETTNMV	Yes	No	Neural cell adhesion molecule L1
P32004	L1CAM	CD171	777	1000	R.GPWQEQIVSDPFLVVSN*TSTFVPYEIK.V	PFLVVSNTSTFVP	No	Yes	L1CAM_HUMAN Neural cell adhesion molecule L1
P32004	L1CAM	CD171	876	1000	K.DHVVVPAN*TTSVILSGLR@PYSSYHLEVQAFN*GR@.G	HVVVPANTTSVIL	No	Yes	L1CAM_HUMAN Neural cell adhesion molecule L1
P32004	L1CAM	CD171	899	1000	K.DHVVVPAN*TTSVILSGLR@PYSSYHLEVQAFN*GR@.G	LEVQAFNGRGSGP	No	Yes	L1CAM_HUMAN Neural cell adhesion molecule L1
P32004	L1CAM	CD171	931	1000	R.GSGPASEFTFSTPEGVPGHPEALHLECQSN*TSLLLR@.W	HLECQSNTSLLLR	No	Yes	L1CAM_HUMAN Neural cell adhesion molecule L1
P32004	L1CAM	CD171	979	1000	R.THN*LTDLSPHLR.Y	PELRTHNLTDLSP	No	Yes	L1CAM_HUMAN Neural cell adhesion molecule L1
P32004	L1CAM	CD171	1071	1000	K.GGASLSPQYVSYN*QSSYTQWDLQPDTDYEIHLFK#.E	PQYVSYNQSSYTQ	No	Yes	L1CAM_HUMAN Neural cell adhesion molecule L1
B4DWL3	LAMP1	CD107a	62	1000	K.SGPKN#MTFDLPSDATVVLN#R.S	TKSGPKNMTFDLP	Yes	No	Lysosome-associated membrane glycoprotein 1 (cDNA FLJ57633, highly similar to Lysosome-associated membrane glycoprotein 1)
B4DWL3	LAMP1	CD107a	76	1000	K.SGPKN#MTFDLPSDATVVLN#R.S	DATVVLNRSSCGK	Yes	No	Lysosome-associated membrane glycoprotein 1 (cDNA FLJ57633, highly similar to Lysosome-associated membrane glycoprotein 1)
P11279	LAMP1	CD107a	84	1000	R.SSCGK#EN*TSDPSLVIAFGR@.G	SSCGKENTSDPSL	Yes	Yes	LAMP1_HUMAN Lysosome-associated membrane glycoprotein 1
P11279	LAMP1	CD107a	103	1000	R.GHTLTLN*FTR@.N	GHTLTLNFTRNAT	Yes	Yes	LAMP1_HUMAN Lysosome-associated membrane glycoprotein 1
P11279	LAMP1	CD107a	121	1000	R.YSVQLMSFVYN*LSDTHLFPN*ASSK#.E	LMSFVYNLSDTHL	Yes	Yes	LAMP1_HUMAN Lysosome-associated membrane glycoprotein 1
P11279	LAMP1	CD107a	130	1000	R.YSVQLMSFVYN*LSDTHLFPN*ASSK#.E	DTHLFPNASSKEI	Yes	Yes	LAMP1_HUMAN Lysosome-associated membrane glycoprotein 1
P11279	LAMP1	CD107a	165	0	R.CVSGTQVHMNN*VTVTLHDATIQAYLSN*SSFSR.G	TQVHMNNVTVTLH	Yes	No	Lysosome-associated membrane glycoprotein 1 (LAMP-1) (Lysosome-associated membrane protein 1) (CD107 antigen-like family member A) (CD antigen CD107a)
P11279	LAMP1	CD107a	181	136.53	R.CVSGTQVHMNN*VTVTLHDATIQAYLSN*SSFSR.G	IQAYLSNSSFSRG	Yes	No	Lysosome-associated membrane glycoprotein 1 (LAMP-1) (Lysosome-associated membrane protein 1) (CD107 antigen-like family member A) (CD antigen CD107a)
B4DWL3	LAMP1	CD107a	208	17.009	R.LLNINPN#K.T	LLNINPNKTSASG	Yes	No	Lysosome-associated membrane glycoprotein 1 (cDNA FLJ57633, highly similar to Lysosome-associated membrane glycoprotein 1)
B4E2S7	LAMP2	CD107b	28	97.635	K.TVTISDHGTVTYN*GSICGDDQNGPK.I	HGTVTYNGSICGD	Yes	No	Lysosome-associated membrane glycoprotein 2 (cDNA FLJ58780, highly similar to Homo sapiens lysosomal-associated membrane protein 2 (LAMP2), transcript variant LAMP2B, mRNA)
P13473	LAMP2	CD107b	49	1000	K.WQMN*FTVR@.Y	YAKWQMNFTVRYE	Yes	Yes	LAMP2_HUMAN Lysosome-associated membrane glycoprotein 2
B4E2S7	LAMP2	CD107b	54	1000	K.IAVQFGPGFSWIAN*FTK.A	GFSWIANFTKAAS	Yes	No	Lysosome-associated membrane glycoprotein 2 (cDNA FLJ58780, highly similar to Homo sapiens lysosomal-associated membrane protein 2 (LAMP2), transcript variant LAMP2B, mRNA)
P13473	LAMP2	CD107b	75	133.582	K.TVTISDHGTVTYN*GSICGDDQNGPK.I	HGTVTYNGSICGD	No	Yes	LAMP2_HUMAN Lysosome-associated membrane glycoprotein 2
P13473	LAMP2	CD107b	101	1000	K.IAVQFGPGFSWIAN*FTK#.A	GFSWIANFTKAAS	No	Yes	LAMP2_HUMAN Lysosome-associated membrane glycoprotein 2
P13473	LAMP2	CD107b	179	33.358	K.NDVVQHYWDVLVQAFVQN*GTVSTNEFLCDK#.D	VQAFVQNGTVSTN	No	Yes	LAMP2_HUMAN Lysosome-associated membrane glycoprotein 2
B4E2S7	LAMP2	CD107b	182	9.296	K.EKPEAGTYSVNNGN#DTCLLATM*GLQLN#ITQDK.V	YSVNNGNDTCLLA	Yes	No	Lysosome-associated membrane glycoprotein 2 (cDNA FLJ58780, highly similar to Homo sapiens lysosomal-associated membrane protein 2 (LAMP2), transcript variant LAMP2B, mRNA)
B4E2S7	LAMP2	CD107b	195	51.225	K.EKPEAGTYSVNNGN#DTCLLATM*GLQLN#ITQDK.V	TMGLQLNITQDKV	Yes	No	Lysosome-associated membrane glycoprotein 2 (cDNA FLJ58780, highly similar to Homo sapiens lysosomal-associated membrane protein 2 (LAMP2), transcript variant LAMP2B, mRNA)
B4E2S7	LAMP2	CD107b	206	33.237	K.EKPEAGTYSVNNGNDTCLLATM*GLQLN#ITQDKVASVIN#INPN#TTHSTGSCR.S	KVASVININPNTT	Yes	No	Lysosome-associated membrane glycoprotein 2 (cDNA FLJ58780, highly similar to Homo sapiens lysosomal-associated membrane protein 2 (LAMP2), transcript variant LAMP2B, mRNA)
B4E2S7	LAMP2	CD107b	210	20.167	K.VASVININPN*TTHSTGSCR.S	VININPNTTHSTG	Yes	No	Lysosome-associated membrane glycoprotein 2 (cDNA FLJ58780, highly similar to Homo sapiens lysosomal-associated membrane protein 2 (LAMP2), transcript variant LAMP2B, mRNA)
B4E2S7	LAMP2	CD107b	228	1000	R.SHTALLRLN#SSTIK.Y	TALLRLNSSTIKY	Yes	No	Lysosome-associated membrane glycoprotein 2 (cDNA FLJ58780, highly similar to Homo sapiens lysosomal-associated membrane protein 2 (LAMP2), transcript variant LAMP2B, mRNA)
P13473	LAMP2	CD107b	257	30.835	K.VASVININPN*TTHSTGSCR.S	VININPNTTHSTG	No	Yes	LAMP2_HUMAN Lysosome-associated membrane glycoprotein 2
B4E2S7	LAMP2	CD107b	309	1000	R.VQPFN#VTQGK.Y	LRVQPFNVTQGKY	Yes	No	Lysosome-associated membrane glycoprotein 2 (cDNA FLJ58780, highly similar to Homo sapiens lysosomal-associated membrane protein 2 (LAMP2), transcript variant LAMP2B, mRNA)
E7ETP9	LAMP3	CD208	242	11.721	R.RYFNIDPN#ATQASGNCGTR.K	YFNIDPNATQASG	Yes	No	Lysosome-associated membrane glycoprotein 3
P42702	LIFR	CD118	572	1000	K.ILSYN#VSCSSDEETQSLSEIPDPQHK.A	GKILSYNVSCSSD	Yes	No	Leukemia inhibitory factor receptor (LIF receptor) (LIF-R) (CD antigen CD118)
P42702	LIFR	CD118	787	1000	K.VKN#ITDISQK.T	SDIKVKNITDISQ	Yes	No	Leukemia inhibitory factor receptor (LIF receptor) (LIF-R) (CD antigen CD118)
Q07954	LRP1	CD91	114	1000	R.ELQGN#CSR.L	CRELQGNCSRLGC	Yes	No	Prolow-density lipoprotein receptor-related protein 1 (LRP-1) (Alpha-2-macroglobulin receptor) (A2MR) (Apolipoprotein E receptor) (APOER) (CD antigen CD91) [Cleaved into: Low-density lipoprotein receptor-related protein 1 85 kDa subunit (LRP-85); Low-density lipoprotein receptor-related protein 1 515 kDa subunit (LRP-515); Low-density lipoprotein receptor-related protein 1 intracellular domain (L…
Q07954	LRP1	CD91	136	1000	R.LGCQHHCVPTLDGPTCYCN*SSFQLQADGK.T	GPTCYCNSSFQLQ	Yes	No	Prolow-density lipoprotein receptor-related protein 1 (LRP-1) (Alpha-2-macroglobulin receptor) (A2MR) (Apolipoprotein E receptor) (APOER) (CD antigen CD91) [Cleaved into: Low-density lipoprotein receptor-related protein 1 85 kDa subunit (LRP-85); Low-density lipoprotein receptor-related protein 1 515 kDa subunit (LRP-515); Low-density lipoprotein receptor-related protein 1 intracellular domain (L…
Q07954	LRP1	CD91	239	1000	R.QTTAM*DFSYAN#ETVCWVHVGDSAAQTQLK.C	MDFSYANETVCWV	Yes	No	Prolow-density lipoprotein receptor-related protein 1 (LRP-1) (Alpha-2-macroglobulin receptor) (A2MR) (Apolipoprotein E receptor) (APOER) (CD antigen CD91) [Cleaved into: Low-density lipoprotein receptor-related protein 1 85 kDa subunit (LRP-85); Low-density lipoprotein receptor-related protein 1 515 kDa subunit (LRP-515); Low-density lipoprotein receptor-related protein 1 intracellular domain (L…
Q07954	LRP1	CD91	446	1000	R.FN*STEYQVVTR@.V	IRVNRFNSTEYQV	Yes	Yes	LRP1_HUMAN Prolow-density lipoprotein receptor-related protein 1
Q07954	LRP1	CD91	729	1000	R.IETILLN*GTDRK.I	IETILLNGTDRKI	Yes	No	Prolow-density lipoprotein receptor-related protein 1 (LRP-1) (Alpha-2-macroglobulin receptor) (A2MR) (Apolipoprotein E receptor) (APOER) (CD antigen CD91) [Cleaved into: Low-density lipoprotein receptor-related protein 1 85 kDa subunit (LRP-85); Low-density lipoprotein receptor-related protein 1 515 kDa subunit (LRP-515); Low-density lipoprotein receptor-related protein 1 intracellular domain (L…
Q07954	LRP1	CD91	1511	1000	K.WTGHN*VTVVQR@.T	NKWTGHNVTVVQR	Yes	Yes	LRP1_HUMAN Prolow-density lipoprotein receptor-related protein 1
Q07954	LRP1	CD91	1543	11.721	R.QPM*APNPCEAN#GGQGPCSHLCLINYN#R.T	PNPCEANGGQGPC	Yes	No	Prolow-density lipoprotein receptor-related protein 1 (LRP-1) (Alpha-2-macroglobulin receptor) (A2MR) (Apolipoprotein E receptor) (APOER) (CD antigen CD91) [Cleaved into: Low-density lipoprotein receptor-related protein 1 85 kDa subunit (LRP-85); Low-density lipoprotein receptor-related protein 1 515 kDa subunit (LRP-515); Low-density lipoprotein receptor-related protein 1 intracellular domain (L…
Q07954	LRP1	CD91	1558	17.009	R.QPM*APNPCEANGGQGPCSHLCLINYN#R.T	LCLINYNRTVSCA	Yes	No	Prolow-density lipoprotein receptor-related protein 1 (LRP-1) (Alpha-2-macroglobulin receptor) (A2MR) (Apolipoprotein E receptor) (APOER) (CD antigen CD91) [Cleaved into: Low-density lipoprotein receptor-related protein 1 85 kDa subunit (LRP-85); Low-density lipoprotein receptor-related protein 1 515 kDa subunit (LRP-515); Low-density lipoprotein receptor-related protein 1 intracellular domain (L…
Q07954	LRP1	CD91	1575	1000	K.LHKDN*TTCYEFKK.F	MKLHKDNTTCYEF	Yes	No	Prolow-density lipoprotein receptor-related protein 1 (LRP-1) (Alpha-2-macroglobulin receptor) (A2MR) (Apolipoprotein E receptor) (APOER) (CD antigen CD91) [Cleaved into: Low-density lipoprotein receptor-related protein 1 85 kDa subunit (LRP-85); Low-density lipoprotein receptor-related protein 1 515 kDa subunit (LRP-515); Low-density lipoprotein receptor-related protein 1 intracellular domain (L…
Q07954	LRP1	CD91	1763	76.733	K.LYWISSGN#HTINR.C	YWISSGNHTINRC	Yes	No	Prolow-density lipoprotein receptor-related protein 1 (LRP-1) (Alpha-2-macroglobulin receptor) (A2MR) (Apolipoprotein E receptor) (APOER) (CD antigen CD91) [Cleaved into: Low-density lipoprotein receptor-related protein 1 85 kDa subunit (LRP-85); Low-density lipoprotein receptor-related protein 1 515 kDa subunit (LRP-515); Low-density lipoprotein receptor-related protein 1 intracellular domain (L…
Q07954	LRP1	CD91	2127	1000	R.GSKDN*ATDSVPLR.T	KRGSKDNATDSVP	Yes	No	Prolow-density lipoprotein receptor-related protein 1 (LRP-1) (Alpha-2-macroglobulin receptor) (A2MR) (Apolipoprotein E receptor) (APOER) (CD antigen CD91) [Cleaved into: Low-density lipoprotein receptor-related protein 1 85 kDa subunit (LRP-85); Low-density lipoprotein receptor-related protein 1 515 kDa subunit (LRP-515); Low-density lipoprotein receptor-related protein 1 intracellular domain (L…
Q07954	LRP1	CD91	2472	15.007	R.VDIPQQPMGIIAVAN#DTNSCELSPCR.I	GIIAVANDTNSCE	Yes	No	Prolow-density lipoprotein receptor-related protein 1 (LRP-1) (Alpha-2-macroglobulin receptor) (A2MR) (Apolipoprotein E receptor) (APOER) (CD antigen CD91) [Cleaved into: Low-density lipoprotein receptor-related protein 1 85 kDa subunit (LRP-85); Low-density lipoprotein receptor-related protein 1 515 kDa subunit (LRP-515); Low-density lipoprotein receptor-related protein 1 intracellular domain (L…
Q07954	LRP1	CD91	2502	48.371	R.INNGGCQDLCLLTHQGHVN*CSCR.G	THQGHVNCSCRGG	Yes	No	Prolow-density lipoprotein receptor-related protein 1 (LRP-1) (Alpha-2-macroglobulin receptor) (A2MR) (Apolipoprotein E receptor) (APOER) (CD antigen CD91) [Cleaved into: Low-density lipoprotein receptor-related protein 1 85 kDa subunit (LRP-85); Low-density lipoprotein receptor-related protein 1 515 kDa subunit (LRP-515); Low-density lipoprotein receptor-related protein 1 intracellular domain (L…
Q07954	LRP1	CD91	2815	7.462	R.WLCDGDKDCADGADESIAAGCLYN#STCDDREFMCQNR.Q	AAGCLYNSTCDDR	Yes	No	Prolow-density lipoprotein receptor-related protein 1 (LRP-1) (Alpha-2-macroglobulin receptor) (A2MR) (Apolipoprotein E receptor) (APOER) (CD antigen CD91) [Cleaved into: Low-density lipoprotein receptor-related protein 1 85 kDa subunit (LRP-85); Low-density lipoprotein receptor-related protein 1 515 kDa subunit (LRP-515); Low-density lipoprotein receptor-related protein 1 intracellular domain (L…
Q07954	LRP1	CD91	2905	1000	K.CN*ASSQFLCSSGR.C	SQEHKCNASSQFL	Yes	No	Prolow-density lipoprotein receptor-related protein 1 (LRP-1) (Alpha-2-macroglobulin receptor) (A2MR) (Apolipoprotein E receptor) (APOER) (CD antigen CD91) [Cleaved into: Low-density lipoprotein receptor-related protein 1 85 kDa subunit (LRP-85); Low-density lipoprotein receptor-related protein 1 515 kDa subunit (LRP-515); Low-density lipoprotein receptor-related protein 1 intracellular domain (L…
Q07954	LRP1	CD91	3048	30.612	R.KLNLDGSN#YTLLK.Q	LNLDGSNYTLLKQ	Yes	No	Prolow-density lipoprotein receptor-related protein 1 (LRP-1) (Alpha-2-macroglobulin receptor) (A2MR) (Apolipoprotein E receptor) (APOER) (CD antigen CD91) [Cleaved into: Low-density lipoprotein receptor-related protein 1 85 kDa subunit (LRP-85); Low-density lipoprotein receptor-related protein 1 515 kDa subunit (LRP-515); Low-density lipoprotein receptor-related protein 1 intracellular domain (L…
Q07954	LRP1	CD91	3089	73.311	R.MHLN*GSNVQVLHR@.T	IRRMHLNGSNVQV	Yes	Yes	LRP1_HUMAN Prolow-density lipoprotein receptor-related protein 1
Q07954	LRP1	CD91	3333	1000	R.TCVSN*CTASQFVCK.N	GRTCVSNCTASQF	Yes	No	Prolow-density lipoprotein receptor-related protein 1 (LRP-1) (Alpha-2-macroglobulin receptor) (A2MR) (Apolipoprotein E receptor) (APOER) (CD antigen CD91) [Cleaved into: Low-density lipoprotein receptor-related protein 1 85 kDa subunit (LRP-85); Low-density lipoprotein receptor-related protein 1 515 kDa subunit (LRP-515); Low-density lipoprotein receptor-related protein 1 intracellular domain (L…
Q07954	LRP1	CD91	3662	0	R.TCPLDEFQCN#NTLCKPLAWK.C	LDEFQCNNTLCKP	Yes	No	Prolow-density lipoprotein receptor-related protein 1 (LRP-1) (Alpha-2-macroglobulin receptor) (A2MR) (Apolipoprotein E receptor) (APOER) (CD antigen CD91) [Cleaved into: Low-density lipoprotein receptor-related protein 1 85 kDa subunit (LRP-85); Low-density lipoprotein receptor-related protein 1 515 kDa subunit (LRP-515); Low-density lipoprotein receptor-related protein 1 intracellular domain (L…
Q07954	LRP1	CD91	3788	1000	K.LTSCATN*ASICGDEAR.C	LTSCATNASICGD	Yes	No	Prolow-density lipoprotein receptor-related protein 1 (LRP-1) (Alpha-2-macroglobulin receptor) (A2MR) (Apolipoprotein E receptor) (APOER) (CD antigen CD91) [Cleaved into: Low-density lipoprotein receptor-related protein 1 85 kDa subunit (LRP-85); Low-density lipoprotein receptor-related protein 1 515 kDa subunit (LRP-515); Low-density lipoprotein receptor-related protein 1 intracellular domain (L…
Q07954	LRP1	CD91	3839	24.437	R.FGTCSQLCN*NTK.G	TCSQLCNNTKGGH	Yes	No	Prolow-density lipoprotein receptor-related protein 1 (LRP-1) (Alpha-2-macroglobulin receptor) (A2MR) (Apolipoprotein E receptor) (APOER) (CD antigen CD91) [Cleaved into: Low-density lipoprotein receptor-related protein 1 85 kDa subunit (LRP-85); Low-density lipoprotein receptor-related protein 1 515 kDa subunit (LRP-515); Low-density lipoprotein receptor-related protein 1 intracellular domain (L…
Q07954	LRP1	CD91	3858	73.448	K.THN#TCKAEGSEYQVLYIADDNEIR.S	NFMKTHNTCKAEG	Yes	No	Prolow-density lipoprotein receptor-related protein 1 (LRP-1) (Alpha-2-macroglobulin receptor) (A2MR) (Apolipoprotein E receptor) (APOER) (CD antigen CD91) [Cleaved into: Low-density lipoprotein receptor-related protein 1 85 kDa subunit (LRP-85); Low-density lipoprotein receptor-related protein 1 515 kDa subunit (LRP-515); Low-density lipoprotein receptor-related protein 1 intracellular domain (L…
Q07954	LRP1	CD91	3953	1000	R.GVTHLN*ISGLK.M	RGVTHLNISGLKM	Yes	No	Prolow-density lipoprotein receptor-related protein 1 (LRP-1) (Alpha-2-macroglobulin receptor) (A2MR) (Apolipoprotein E receptor) (APOER) (CD antigen CD91) [Cleaved into: Low-density lipoprotein receptor-related protein 1 85 kDa subunit (LRP-85); Low-density lipoprotein receptor-related protein 1 515 kDa subunit (LRP-515); Low-density lipoprotein receptor-related protein 1 intracellular domain (L…
Q07954	LRP1	CD91	4075	1000	R.LN#GTDPIVAADSKR.G	IGSIRLNGTDPIV	Yes	No	Prolow-density lipoprotein receptor-related protein 1 (LRP-1) (Alpha-2-macroglobulin receptor) (A2MR) (Apolipoprotein E receptor) (APOER) (CD antigen CD91) [Cleaved into: Low-density lipoprotein receptor-related protein 1 85 kDa subunit (LRP-85); Low-density lipoprotein receptor-related protein 1 515 kDa subunit (LRP-515); Low-density lipoprotein receptor-related protein 1 intracellular domain (L…
Q07954	LRP1	CD91	4125	1000	K.FGHSPLVN*LTGGLSHASDVVLYHQHK.Q	GHSPLVNLTGGLS	Yes	No	Prolow-density lipoprotein receptor-related protein 1 (LRP-1) (Alpha-2-macroglobulin receptor) (A2MR) (Apolipoprotein E receptor) (APOER) (CD antigen CD91) [Cleaved into: Low-density lipoprotein receptor-related protein 1 85 kDa subunit (LRP-85); Low-density lipoprotein receptor-related protein 1 515 kDa subunit (LRP-515); Low-density lipoprotein receptor-related protein 1 intracellular domain (L…
Q07954	LRP1	CD91	4278	0	K.CTQQVCAGYCAN#NSTCTVNQGNQPQCR.C	CAGYCANNSTCTV	Yes	No	Prolow-density lipoprotein receptor-related protein 1 (LRP-1) (Alpha-2-macroglobulin receptor) (A2MR) (Apolipoprotein E receptor) (APOER) (CD antigen CD91) [Cleaved into: Low-density lipoprotein receptor-related protein 1 85 kDa subunit (LRP-85); Low-density lipoprotein receptor-related protein 1 515 kDa subunit (LRP-515); Low-density lipoprotein receptor-related protein 1 intracellular domain (L…
Q07954	LRP1	CD91	4279	6.591	K.CTQQVCAGYCANN*STCTVNQGNQPQCR.C	AGYCANNSTCTVN	Yes	No	Prolow-density lipoprotein receptor-related protein 1 (LRP-1) (Alpha-2-macroglobulin receptor) (A2MR) (Apolipoprotein E receptor) (APOER) (CD antigen CD91) [Cleaved into: Low-density lipoprotein receptor-related protein 1 85 kDa subunit (LRP-85); Low-density lipoprotein receptor-related protein 1 515 kDa subunit (LRP-515); Low-density lipoprotein receptor-related protein 1 intracellular domain (L…
O60449	LY75	CD205	135	1000	K.DGHGTAISN*ASDVWK#.K	HGTAISNASDVWK	No	Yes	LY75_HUMAN Lymphocyte antigen 75
P43121	MCAM	CD146	56	1000	K.CGLSQSQGN*LSHVDWFSVHK#.E	LSQSQGNLSHVDW	Yes	Yes	MUC18_HUMAN Cell surface glycoprotein MUC18
P43121	MCAM	CD146	418	1000	R.CVASVPSIPGLN*R@.T	PSIPGLNRTQLVN	No	Yes	MUC18_HUMAN Cell surface glycoprotein MUC18
C9JVN1	MFI2	CD228	38	1000	R.WCATSDPEQHKCGN#MSEAFR.E	EQHKCGNMSEAFR	Yes	No	Melanotransferrin (Fragment)
P08473	MME	CD10	285	23.956	K.VMELEKEIAN#ATAKPEDRNDPMLLYNK.M	LEKEIANATAKPE	Yes	No	Neprilysin (EC 3.4.24.11) (Atriopeptidase) (Common acute lymphocytic leukemia antigen) (CALLA) (Enkephalinase) (Neutral endopeptidase 24.11) (NEP) (Neutral endopeptidase) (Skin fibroblast elastase) (SFE) (CD antigen CD10)
Q9UBG0	MRC2	CD280	69	1000	R.VTPACN*TSLPAQR@.W	RVTPACNTSLPAQ	Yes	Yes	MRC2_HUMAN C-type mannose receptor 2
Q9UBG0	MRC2	CD280	140	1000	R.TSN*ISKPGTLER.G	LGARTSNISKPGT	Yes	Yes	MRC2_HUMAN C-type mannose receptor 2
Q9UBG0	MRC2	CD280	497	65.44	R.WNDSPCN*QSLPSICK#.K	WNDSPCNQSLPSI	No	Yes	MRC2_HUMAN C-type mannose receptor 2
H7BYX6	NCAM1	CD56	346	1000	R.TSTRN#ISSEEK.A	WRTSTRNISSEEK	Yes	No	Neural cell adhesion molecule 1
H7BYX6	NCAM1	CD56	458	24.243	R.DGQLLPSSN*YSNIK.I	QLLPSSNYSNIKI	Yes	No	Neural cell adhesion molecule 1
H7BYX6	NCAM1	CD56	487	5.085	K.IYNTPSASYLEVTPDSENDFGNYN#CTAVNR.I	NDFGNYNCTAVNR	Yes	No	Neural cell adhesion molecule 1
O14786	NRP1	CD304	150	1000	R.GPECSQN*YTTPSGVIK#.S	GPECSQNYTTPSG	Yes	Yes	NRP1_HUMAN Neuropilin-1
O14786	NRP1	CD304	261	1000	K.EGFSAN*YSVLQSSVSEDFK#.C	KEGFSANYSVLQS	No	Yes	NRP1_HUMAN Neuropilin-1
O14786	NRP1	CD304	522	9.34	K.IGYSNN*GSDWK#.M	KIGYSNNGSDWKM	Yes	Yes	NRP1_HUMAN Neuropilin-1
P21589	NT5E	CD73	333	1000	K.LDN*YSTQELGK#.T	WRIKLDNYSTQEL	No	Yes	5NTD_HUMAN 5'-nucleotidase
P21589	NT5E	CD73	403	0	R.SPIDER@NN*GTITWENLAAVLPFGGTFDLVQLK#.G	PIDERNNGTITWE	No	Yes	5NTD_HUMAN 5'-nucleotidase
M0QYR6	PLAUR	CD87	197	1000	K.GN#STHGCSSEETFLIDCR.G	CYSCKGNSTHGCS	Yes	No	Urokinase plasminogen activator surface receptor (Fragment)
Q03405	PLAUR	CD87	222	1000	K.GN*STHGCSSEETFLIDCR@.G	CYSCKGNSTHGCS	No	Yes	UPAR_HUMAN Urokinase plasminogen activator surface receptor
Q03405	PLAUR	CD87	255	80.411	R.GPMNQCLVATGTHEPKN#QSYMVR.G	GTHEPKNQSYMVR	Yes	No	Urokinase plasminogen activator surface receptor (U-PAR) (uPAR) (Monocyte activation antigen Mo3) (CD antigen CD87)
A2A2V1	PRNP	CD230	171	3.065	R.YPNQVYYRPMDEYSN#QNNFVHDCVN#ITIK.Q	PMDEYSNQNNFVH	Yes	No	Major prion protein (Fragment)
P04156	PRNP	CD230	181	39.663	R.YPNQVYYR@PM^DEYSNQNNFVHDCVN*ITIK#.Q	FVHDCVNITIKQH	Yes	Yes	PRIO_HUMAN Major prion protein
P04156	PRNP	CD230	197	1000	K.GEN*FTETDVK#.M	TTTKGENFTETDV	Yes	Yes	PRIO_HUMAN Major prion protein
Q9P2B2	PTGFRN	CD315	286	1000	R.AAVPKN#VSVAEGK.E	RAAVPKNVSVAEG	Yes	No	Prostaglandin F2 receptor negative regulator (CD9 partner 1) (CD9P-1) (Glu-Trp-Ile EWI motif-containing protein F) (EWI-F) (Prostaglandin F2-alpha receptor regulatory protein) (Prostaglandin F2-alpha receptor-associated protein) (CD antigen CD315)
Q9P2B2	PTGFRN	CD315	300	1000	K.ELDLTCN*ITTDR.A	ELDLTCNITTDRA	Yes	Yes	FPRP_HUMAN Prostaglandin F2 receptor negative regulator
Q9P2B2	PTGFRN	CD315	383	84.892	K.ENSGYYYCHVSLWAPGHN*R.S	LWAPGHNRSWHKV	Yes	Yes	FPRP_HUMAN Prostaglandin F2 receptor negative regulator
Q9P2B2	PTGFRN	CD315	413	1000	K.VAEAVSSPAGVGVTWLEPDYQVYLN#ASK.V	DYQVYLNASKVPG	Yes	No	Prostaglandin F2 receptor negative regulator (CD9 partner 1) (CD9P-1) (Glu-Trp-Ile EWI motif-containing protein F) (EWI-F) (Prostaglandin F2-alpha receptor regulatory protein) (Prostaglandin F2-alpha receptor-associated protein) (CD antigen CD315)
Q9P2B2	PTGFRN	CD315	600	1000	R.YSVLIMAEKPVGDLSSPN*ETK.Y	GDLSSPNETKYII	Yes	Yes	FPRP_HUMAN Prostaglandin F2 receptor negative regulator
Q9P2B2	PTGFRN	CD315	618	1000	K.LEN#WTDASR.V	SVVKLENWTDASR	Yes	No	Prostaglandin F2 receptor negative regulator (CD9 partner 1) (CD9P-1) (Glu-Trp-Ile EWI motif-containing protein F) (EWI-F) (Prostaglandin F2-alpha receptor regulatory protein) (Prostaglandin F2-alpha receptor-associated protein) (CD antigen CD315)
Q9P2B2	PTGFRN	CD315	691	55.776	R.EAATSLSNPIEIDFQTSGPIFN#ASVHSDTPSVIR.G	TSGPIFNASVHSD	Yes	No	Prostaglandin F2 receptor negative regulator (CD9 partner 1) (CD9P-1) (Glu-Trp-Ile EWI motif-containing protein F) (EWI-F) (Prostaglandin F2-alpha receptor regulatory protein) (Prostaglandin F2-alpha receptor-associated protein) (CD antigen CD315)
Q12913	PTPRJ	CD148	142	1000	K.SN*DTAASEYK#.Y	ILTWKSNDTAASE	No	Yes	PTPRJ_HUMAN Receptor-type tyrosine-protein phosphatase eta
Q12913	PTPRJ	CD148	172	1000	K.TITVVHQPWCN*ITGLR@PATSYVFSITPGIGN*ETWGDPR@.V	VHQPWCNITGLRP	No	Yes	PTPRJ_HUMAN Receptor-type tyrosine-protein phosphatase eta
Q12913	PTPRJ	CD148	192	1000	K.TITVVHQPWCN*ITGLR@PATSYVFSITPGIGN*ETWGDPR@.V	ITPGIGNETWGDP	No	Yes	PTPRJ_HUMAN Receptor-type tyrosine-protein phosphatase eta
Q12913	PTPRJ	CD148	231	6.591	K.AALSWSNGN*GTASCR@.V	LSWSNGNGTASCR	No	Yes	PTPRJ_HUMAN Receptor-type tyrosine-protein phosphatase eta
Q12913	PTPRJ	CD148	258	117.312	R.LQVN*ISGLK#PGVQYNINPYLLQSN*K#.T	DSRLQVNISGLKP	Yes	Yes	PTPRJ_HUMAN Receptor-type tyrosine-protein phosphatase eta
Q12913	PTPRJ	CD148	278	49.59	R.LQVN*ISGLK#PGVQYNINPYLLQSN*K#.T	PYLLQSNKTKGDP	Yes	Yes	PTPRJ_HUMAN Receptor-type tyrosine-protein phosphatase eta
Q12913	PTPRJ	CD148	342	1000	R.YN*ATVYSQAAN*GTEGQPQAIEFR@.T	EPGTRYNATVYSQ	Yes	Yes	PTPRJ_HUMAN Receptor-type tyrosine-protein phosphatase eta
Q12913	PTPRJ	CD148	351	1000	R.YN*ATVYSQAAN*GTEGQPQAIEFR@.T	VYSQAANGTEGQP	Yes	Yes	PTPRJ_HUMAN Receptor-type tyrosine-protein phosphatase eta
Q12913	PTPRJ	CD148	391	1000	K.VSDN*ESSSN*YTYK#.I	IWKVSDNESSSNY	Yes	Yes	PTPRJ_HUMAN Receptor-type tyrosine-protein phosphatase eta
Q12913	PTPRJ	CD148	396	1000	K.VSDN*ESSSN*YTYK#.I	DNESSSNYTYKIH	Yes	Yes	PTPRJ_HUMAN Receptor-type tyrosine-protein phosphatase eta
Q12913	PTPRJ	CD148	413	76.733	K.IHVAGETDSSNLN*VSEPR@.A	TDSSNLNVSEPRA	Yes	Yes	PTPRJ_HUMAN Receptor-type tyrosine-protein phosphatase eta
Q12913	PTPRJ	CD148	431	1000	R.SSTFYN*ITVCPVLGDIEGTPGFLQVHTPPVPVSDFR@.V	RSSTFYNITVCPV	Yes	Yes	PTPRJ_HUMAN Receptor-type tyrosine-protein phosphatase eta
Q12913	PTPRJ	CD148	824	28.218	R.NTCTTGITDPPPPDGSPN*ITSVSHNSVK#.V	PPDGSPNITSVSH	Yes	Yes	PTPRJ_HUMAN Receptor-type tyrosine-protein phosphatase eta
P15151	PVR	CD155	120	1000	R.VEDEGN*YTCLFVTFPQGSR@.S	RVEDEGNYTCLFV	Yes	Yes	PVR_HUMAN Poliovirus receptor
Q15223	PVRL1	CD111	139	24.465	R.ESQLN#LTVMAKPTNWIEGTQAVLR.A	NRESQLNLTVMAK	Yes	No	Poliovirus receptor-related protein 1 (Herpes virus entry mediator C) (Herpesvirus entry mediator C) (HveC) (Herpesvirus Ig-like receptor) (HIgR) (Nectin-1) (CD antigen CD111)
Q15223	PVRL1	CD111	202	36.655	R.NPN*GTVTVISR@.Y	QEIRNPNGTVTVI	Yes	Yes	PVRL1_HUMAN Poliovirus receptor-related protein 1
Q15223	PVRL1	CD111	286	138.848	K.ADANPPATEYHWTTLN*GSLPK.G	YHWTTLNGSLPKG	Yes	Yes	PVRL1_HUMAN Poliovirus receptor-related protein 1
Q92692	PVRL2	CD112	137	1000	K.QSTGQDTEAELQDATLALHGLTVEDEGN#YTCEFATFPK.G	TVEDEGNYTCEFA	Yes	No	Poliovirus receptor-related protein 2 (Herpes virus entry mediator B) (Herpesvirus entry mediator B) (HveB) (Nectin-2) (CD antigen CD112)
C9J795	PVRL3	CDw113	78	12.431	R.VLFKN*YSLNDATITLHNIGFSDSGK.Y	GRVLFKNYSLNDA	Yes	No	Poliovirus receptor-related protein 3 (Fragment)
H7C4L0	PVRL3	CDw113	232	21.814	R.LDGQWPDGLLASDNTLHFVHPLTFN*YSGVYICK.V	VHPLTFNYSGVYI	Yes	No	Poliovirus receptor-related protein 3 (Fragment)
Q9NQS3	PVRL3	CDw113	331	32.925	R.LDGQWPDGLLASDNTLHFVHPLTFN*YSGVYICK#.V	VHPLTFNYSGVYI	No	Yes	PVRL3_HUMAN Poliovirus receptor-related protein 3
Q92854	SEMA4D	CD100	379	87.265	R.AAN*YTSSLNLPDK#.T	SEARAANYTSSLN	No	Yes	SEM4D_HUMAN Semaphorin-4D
O75326	SEMA7A	CD108	157	53.534	R.HPSCWNLVN*GTVVPLGEMR@.G	SCWNLVNGTVVPL	No	Yes	SEM7A_HUMAN Semaphorin-7A
P78324	SIRPA	CD172a	110	1000	R.IGN*ITPADAGTYYCVK.F	FSIRIGNITPADA	Yes	No	Tyrosine-protein phosphatase non-receptor type substrate 1 (SHP substrate 1) (SHPS-1) (Brain Ig-like molecule with tyrosine-based activation motifs) (Bit) (CD172 antigen-like family member A) (Inhibitory receptor SHPS-1) (Macrophage fusion receptor) (MyD-1 antigen) (Signal-regulatory protein alpha-1) (Sirp-alpha-1) (Signal-regulatory protein alpha-2) (Sirp-alpha-2) (Signal-regulatory protein alph…
H3BQ21	SIRPB1	CD172b	82	1000	R.GTAN*LSETIR.V	PLRGTANLSETIR	Yes	No	Signal-regulatory protein beta-1 isoform 3 (Fragment)
H3BQ21	SIRPB1	CD172b	107	2.806	R.VPPTLEVTQQPVRAENQVN#VTCQVR.K	RAENQVNVTCQVR	Yes	No	Signal-regulatory protein beta-1 isoform 3 (Fragment)
Q8WWI5	SLC44A1	CDw92	135	35.269	K.FAEIN*GSALCSYNLKPSEYTTSPK.S	QKFAEINGSALCS	Yes	No	Choline transporter-like protein 1 (CDw92) (Solute carrier family 44 member 1) (CD antigen CD92)
Q8WWI5	SLC44A1	CDw92	180	1000	R.CAPVN*ISCYAK.F	HRCAPVNISCYAK	Yes	No	Choline transporter-like protein 1 (CDw92) (Solute carrier family 44 member 1) (CD antigen CD92)
G3V0E5	TFRC	CD71	170	1000	K.KDFEDLYTPVN*GSIVIVR.A	DLYTPVNGSIVIV	Yes	No	Transferrin receptor (P90, CD71), isoform CRA_c (Transferrin receptor protein 1, serum form)
P02786	TFRC	CD71	251	1000	K.DFEDLYTPVN*GSIVIVR@.A	DLYTPVNGSIVIV	No	Yes	TFR1_HUMAN Transferrin receptor protein 1
P02786	TFRC	CD71	727	31.275	K.QNNGAFN*ETLFR.N	QNNGAFNETLFRN	No	Yes	TFR1_HUMAN Transferrin receptor protein 1
P07204	THBD	CD141	115	9.34	R.GFQWVTGDN*NTSYSR@.W	QWVTGDNNTSYSR	No	Yes	TRBM_HUMAN Thrombomodulin
P07204	THBD	CD141	116	9.34	R.GFQWVTGDNN*TSYSR@.W	WVTGDNNTSYSRW	No	Yes	TRBM_HUMAN Thrombomodulin
P07204	THBD	CD141	382	44.425	R.ANCEYQCQPLN#QTSYLCVCAEGFAPIPHEPHR.C	YQCQPLNQTSYLC	Yes	No	Thrombomodulin (TM) (Fetomodulin) (CD antigen CD141)
Q9Y6Q6	TNFRSF11A	CD265	105	1000	K.ALVAVVAGN#STTPR.R	VAVVAGNSTTPRR	Yes	No	Tumor necrosis factor receptor superfamily member 11A (Osteoclast differentiation factor receptor) (ODFR) (Receptor activator of NF-KB) (CD antigen CD265)
F5H061	TNFRSF1A	CD120a	54	9.34	K.YIHPQN*NSICCTK.C	KYIHPQNNSICCT	Yes	No	Tumor necrosis factor receptor superfamily member 1A, membrane form

## Sheet: Description
Column Heading	Description
UniProt name	UniProt symbol of the protein
Gene symbol	Gene symbol for the assigned N-sialoglycoprotein
CD	Name of the cluster of differentiation
Site	The N-sialoglycosylation site
ModScore	Score matching the indicated N-sialoglycosylation site
Sequence	Sequence of the N-sialoglycopeptide obtained by ModScore, *-N-sialoglycosylation site; ^-methionine oxidation; @-heavy isotope labled arginine; #-heavy isotope labled lysine
Local sequence	Local sequence of the glycosylation site
ID_in_HEK	Peptide identified in the HEK experiment
ID_in_SILAC	Peptide identified in the SILAC experiment
Annotation	Description of the protein function
