# Supplementary material for: Systematic and site-specific analysis of N-sialoglycosylated proteins on the cell surface by integrating click chemistry and MS-based proteomics
Source: Royal Society of Chemistry journal article supplement (doi:10.1039/c5sc01124h), 2015-01-01
Supplement: c5sc01124h6.xlsx [file c5sc01124h6.xlsx]

## Sheet: Sialylglycopeptide-quantified
Table S13. Quantification of 119 N-sialoglycoprotein sites on 57 CDs in breast cancer cells
UniProt name	Gene symbol	CD	Sequence	Site	ModScore	Peptide ratio	Redun	Obs m/z	z	ppm	XCorr	Delta Corr	Annotation
O14786	NRP1	CD304	R.GPECSQN*YTTPSGVIK.S	150	1000	19.714	5	870.904	2	0.67	4.232	0.529	NRP1_HUMAN Neuropilin-1
O14786	NRP1	CD304	K.EGFSAN*YSVLQSSVSEDFK#.C	261	1000	1.42469	7	1052.99	2	-1.8	3.725	0.628	NRP1_HUMAN Neuropilin-1
O60449	LY75	CD205	K.DGHGTAISN*ASDVWK#.K	135	1000	1.50186	2	523.582	3	0.36	2.029	0.359	LY75_HUMAN Lymphocyte antigen 75
O75144	ICOSLG	CD275	K.TVVTYHIPQN*SSLENVDSR.Y	70	30.612	0.103906	2	721.357	3	-1.56	2.536	0.372	ICOSL_HUMAN ICOS ligand
O75326	SEMA7A	CD108	R.HPSCWNLVN*GTVVPLGEMR@.G	157	37.54	5.68792	1	1088.04	2	0.09	3.281	0.17	SEM7A_HUMAN Semaphorin-7A
P02786	TFRC	CD71	K.K#DFEDLYTPVN*GSIVIVR@.A	251	1000	1.05823	1	1041.57	2	2.07	3.951	0.572	TFR1_HUMAN Transferrin receptor protein 1
P02786	TFRC	CD71	K.QNNGAFN*ETLFR.N	727	31.275	0.158984	2	707.336	2	0.35	2.288	0.468	TFR1_HUMAN Transferrin receptor protein 1
P04156	PRNP	CD230	R.YPNQVYYR@PMDEYSNQNNFVHDCVN*ITIK#.Q	181	26.359	16.045	2	910.425	4	0.42	3.71	0.019	PRIO_HUMAN Major prion protein
P04156	PRNP	CD230	K.GEN*FTETDVK#.M	197	1000	9.39374	2	575.766	2	0.3	2.798	0.502	PRIO_HUMAN Major prion protein
P04233	CD74	CD74	R.MATPLLMQALPMGALPQGPMQN*ATK#.Y	130	1000	1.39905	5	1311.17	2	-1.62	3.629	0.422	HG2A_HUMAN HLA class II histocompatibility antigen gamma chain
P04233	CD74	CD74	K.YGN*MTEDHVMHLLQNADPLK#.V	136	143.502	3.77022	2	779.705	3	0.85	3.527	0.402	HG2A_HUMAN HLA class II histocompatibility antigen gamma chain
P04626	ERBB2	CD340	K.NNQLALTLIDTN*R@.S	187	122.154	1.07628	3	747.91	2	1.76	2.327	0.452	ERBB2_HUMAN Receptor tyrosine-protein kinase erbB-2
P04626	ERBB2	CD340	R.GHCWGPGPTQCVN*CSQFLR@.G	530	1000	1.53416	4	757.334	3	-0.13	4.415	0.523	ERBB2_HUMAN Receptor tyrosine-protein kinase erbB-2
P05362	ICAM1	CD54	R.DHHGAN*FSCR@.T	183	1000	7.80366	1	403.84	3	0	2.466	0.356	ICAM1_HUMAN Intercellular adhesion molecule 1
P05362	ICAM1	CD54	R.LNPTVTYGN*DSFSAK.A	267	64.398	2.91845	1	808.888	2	-0.16	2.319	0.527	ICAM1_HUMAN Intercellular adhesion molecule 1
P05556	ITGB1	CD29	K.SCGECIQAGPNCGWCTN*STFLQEGMPTSAR@.C	50	28.218	1.90812	10	1129.14	3	0	4.511	0.169	ITB1_HUMAN Integrin beta-1
P05556	ITGB1	CD29	R.NPCTSEQN*CTSPFSYK#.N	212	123.857	14.2129	4	965.9	2	0.26	4.614	0.538	ITB1_HUMAN Integrin beta-1
P05556	ITGB1	CD29	K.CHEGN*GTFECGACR.C	481	1000	13.9825	4	829.306	2	0.66	4.373	0.789	ITB1_HUMAN Integrin beta-1
P05556	ITGB1	CD29	R.KEN*SSEICSNNGECVCGQCVCR.K	520	100.742	5.67138	5	884.015	3	-0.53	4.9	0.172	ITB1_HUMAN Integrin beta-1
P05556	ITGB1	CD29	K.KDTCTQECSYFN*ITK#.V	669	1000	9.96555	4	953.421	2	0.76	3.918	0.14	ITB1_HUMAN Integrin beta-1
P06213	INSR	CD220	K.HN*LTITQGK#.L	445	1000	4.98831	1	511.784	2	0.51	2.863	0.456	Insulin receptor (IR) (EC 2.7.10.1) (CD antigen CD220) [Cleaved into: Insulin receptor subunit alpha; Insulin receptor subunit beta]
P06213	INSR	CD220	K.HN*QSEYEDSAGECCSCPK#.T	698	1000	4.0571	1	723.603	3	0.52	4.936	0.868	Insulin receptor (IR) (EC 2.7.10.1) (CD antigen CD220) [Cleaved into: Insulin receptor subunit alpha; Insulin receptor subunit beta]
P06731	CEACAM5	CD66e	K.NSGLYTCQAN*NSASGHSR.T	480	30.835	0.0226908	1	642.947	3	0.35	2.74	0.109	CEAM5_HUMAN Carcinoembryonic antigen-related cell adhesion molecule 5
P06756	ITGAV	CD51	K.AN*TTQPGIVEGGQVLK#.C	74	1000	2.39562	2	811.941	2	0.99	3.005	0.402	ITAV_HUMAN Integrin alpha-V
P06756	ITGAV	CD51	K.ISSLQTTEKN*DTVAGQGERDHLITK.R	874	1000	0.935397	3	915.47	3	0.34	3.503	0.343	ITAV_HUMAN Integrin alpha-V
P08069	IGF1R	CD221	R.ACTENNECCHPECLGSCSAPDN*DTACVACR.H	244	92.247	0.293199	2	1173.43	3	0.33	6.128	0.57	IGF1R_HUMAN Insulin-like growth factor 1 receptor
P08069	IGF1R	CD221	R.DVMQVAN*TTMSSR.S	747	1000	0.147711	1	721.828	2	-0.36	3.067	0.439	IGF1R_HUMAN Insulin-like growth factor 1 receptor
P08174	CD55	CD55	K.GSQWSDIEEFCN*R.S	95	1000	1.10263	10	815.838	2	0.01	2.944	0.407	DAF_HUMAN Complement decay-accelerating factor
P08648	ITGA5	CD49e	R.TEK#EPLSDPVGTCYLSTDN*FTR@.I	182	1000	2.88491	0	849.738	3	-0.02	4.509	0.568	ITA5_HUMAN Integrin alpha-5
P08648	ITGA5	CD49e	K.NALN*LTFHAQNVGEGGAYEAELR@.V	675	30.835	0.646244	0	828.41	3	0.81	3.882	0.043	ITA5_HUMAN Integrin alpha-5
P08648	ITGA5	CD49e	R.VTGLN*CTTNHPINPK#.G	868	31.275	15.3201	0	838.923	2	-0.78	3.73	0.264	ITA5_HUMAN Integrin alpha-5
P08962	CD63	CD63	K.CCGAAN*YTDWEK#.I	150	1000	0.990515	6	743.29	2	-1.04	3.302	0.593	CD63_HUMAN CD63 antigen
P11279	LAMP1	CD107a	R.SSCGK#EN*TSDPSLVIAFGR@.G	84	1000	0.739668	1	681.337	3	1.82	2.494	0.306	LAMP1_HUMAN Lysosome-associated membrane glycoprotein 1
P11279	LAMP1	CD107a	R.GHTLTLN*FTR@.N	103	1000	1.12471	1	584.82	2	1.87	1.994	0.403	LAMP1_HUMAN Lysosome-associated membrane glycoprotein 1
P11717	IGF2R	CD222	R.MSVINFECN*K#.T	435	20.167	0.832112	0	626.787	2	-0.29	1.896	0.028	MPRI_HUMAN Cation-independent mannose-6-phosphate receptor
P11717	IGF2R	CD222	K.HFN*YTSLIAFHCK.R	1757	1000	0.428733	0	547.597	3	-0.87	2.581	0.335	MPRI_HUMAN Cation-independent mannose-6-phosphate receptor
P13473	LAMP2	CD107b	K.WQMN*FTVR@.Y	49	1000	1.03344	2	545.77	2	0.18	1.75	0.304	LAMP2_HUMAN Lysosome-associated membrane glycoprotein 2
P13473	LAMP2	CD107b	K.TVTISDHGTVTYN*GSICGDDQNGPK.I	75	133.582	0.990686	3	880.398	3	0.52	3.829	0.325	LAMP2_HUMAN Lysosome-associated membrane glycoprotein 2
P13473	LAMP2	CD107b	K.IAVQFGPGFSWIAN*FTK.A	101	1000	1.39779	3	943.49	2	-0.71	4.746	0.513	LAMP2_HUMAN Lysosome-associated membrane glycoprotein 2
P13473	LAMP2	CD107b	K.VASVININPN*TTHSTGSCR.S	257	30.835	6.51132	5	1016	2	1.4	4.554	0.21	LAMP2_HUMAN Lysosome-associated membrane glycoprotein 2
P13598	ICAM2	CD102	K.HYLVSN*ISHDTVLQCHFTCSGK#.Q	82	1000	0.526553	4	654.309	4	-0.13	3.781	0.445	ICAM2_HUMAN Intercellular adhesion molecule 2
P13598	ICAM2	CD102	R.GN*ETLHYETFGK#.A	153	1000	3.39015	5	703.832	2	0.1	2.856	0.337	ICAM2_HUMAN Intercellular adhesion molecule 2
P13598	ICAM2	CD102	K.AAPAPQEATATFN*STADR@EDGHR@.N	176	1000	1.48797	4	1214.58	2	1.09	2.852	0.391	ICAM2_HUMAN Intercellular adhesion molecule 2
P13726	F3	CD142	K.VN*VTVEDER@.T	156	1000	11.0575	1	535.271	2	0.12	2.386	0.434	TF_HUMAN Tissue factor
P13726	F3	CD142	R.R@N*NTFLSLR@.D	169	24.437	73.657	1	568.329	2	0.57	2.695	0.151	TF_HUMAN Tissue factor
P13987	CD59	CD59	K.TAVN*CSSDFDACLITK#.A	43	1000	0.421543	3	906.911	2	1.19	3.758	0.578	CD59_HUMAN CD59 glycoprotein
P15529	CD46	CD46	K.GYFYIPPLATHTICDR@N*HTWLPVSDDACYR@.E	83	1000	1.27249	14	1218.58	3	0.26	3.565	0.355	MCP_HUMAN Membrane cofactor protein
P16070	CD44	CD44	K.AFN*STLPTM^AQMEK#.A	57	1000	11.351	26	798.374	2	-0.63	2.902	0.016	CD44_HUMAN CD44 antigen
P16144	ITGB4	CD104	K.HNIIPIFAVTN*YSYSYYEK#.L	327	171.488	11.375	4	1167.08	2	0.59	5.419	0.577	ITB4_HUMAN Integrin beta-4
P16144	ITGB4	CD104	R.CSFR@DEDDDCTYSYTMEGDGAPGPN*STVLVHK#.K	695	1000	5.84519	4	910.886	4	-0.11	5.115	0.64	ITB4_HUMAN Integrin beta-4
P17301	ITGA2	CD49b	K.LNLQTSTSIPN*VTEMK#.T	105	143.484	5.4315	4	893.965	2	0.16	4.656	0.644	ITA2_HUMAN Integrin alpha-2
P17301	ITGA2	CD49b	R.YFFN*VSDEAALLEK#.A	343	1000	3.84598	3	828.911	2	0.63	4.079	0.572	ITA2_HUMAN Integrin alpha-2
P17301	ITGA2	CD49b	R.TASCSN*VTCWLK#.D	1057	1000	13.5879	0	719.327	2	-0.22	1.924	0.446	ITA2_HUMAN Integrin alpha-2
P21589	NT5E	CD73	R.IK#LDN*YSTQELGK#.T	333	1000	54.6254	3	764.41	2	0.27	3.934	0.518	5NTD_HUMAN 5'-nucleotidase
P23229	ITGA6	CD49f	K.EINSLN*LTESHNSR@K#.K	930	24.243	1.32928	6	879.956	2	-0.74	3.406	0.349	ITA6_HUMAN Integrin alpha-6
P25942	CD40	CD40	K.DLVVQQAGTN*K#TDVVCGPQDR@.L	180	1000	0.988628	0	773.055	3	-0.56	4.869	0.442	Tumor necrosis factor receptor superfamily member 5 (B-cell surface antigen CD40) (Bp50) (CD40L receptor) (CDw40) (CD antigen CD40)
P26006	ITGA3	CD49c	R.ELAVPDGYTN*R@.T	86	1000	22.8758	2	622.311	2	0.52	2.322	0.393	ITA3_HUMAN Integrin alpha-3
P26006	ITGA3	CD49c	K.DDCER@MN*ITVK#.N	107	1000	3.73019	2	466.554	3	0.03	2.384	0.444	ITA3_HUMAN Integrin alpha-3
P26006	ITGA3	CD49c	K.N*ITIVTGAPR@.H	265	1000	24.0248	2	525.811	2	0.32	2.395	0.45	ITA3_HUMAN Integrin alpha-3
P26006	ITGA3	CD49c	R.R@N*ITLAYTLEADR@DR@.R	511	1000	9.383	1	914.501	2	0.35	2.542	0.327	ITA3_HUMAN Integrin alpha-3
P26006	ITGA3	CD49c	K.LR@PIIISMN*YSLPLR@.M	573	1000	28.2818	1	601.028	3	0.68	3.024	0.366	ITA3_HUMAN Integrin alpha-3
P26006	ITGA3	CD49c	K.LLLSIN*VTNTR@.T	656	73.311	7.96004	2	626.877	2	0.48	2.911	0.205	ITA3_HUMAN Integrin alpha-3
P26006	ITGA3	CD49c	R.AHCVWLECPIPDAPVVTN*VTVK#.A	926	1000	9.73479	1	839.427	3	0.71	5	0.315	ITA3_HUMAN Integrin alpha-3
P26006	ITGA3	CD49c	R.VN*GWATLFLR@.T	951	1000	1.347	1	593.334	2	0.21	2.493	0.33	ITA3_HUMAN Integrin alpha-3
P27701	CD82	CD82	R.DYN*SSR@EDSLQDAWDYVQAQVK#.C	129	1000	1.78058	2	878.739	3	0.17	5.012	0.565	CD82_HUMAN CD82 antigen
P32004	L1CAM	CD171	R.VTMGQNGNLYFANVLTSDN*HSDYICHAHFPGTR@.T	203	23.711	4.00361	4	749.948	5	0.06	3.257	0.259	L1CAM_HUMAN Neural cell adhesion molecule L1
P32004	L1CAM	CD171	R.LLFPTN*SSSHLVALQGQPLVLECIAEGFPTPTIK#.W	247	1000	4.63349	4	922.997	4	0.91	4.114	0.43	L1CAM_HUMAN Neural cell adhesion molecule L1
P32004	L1CAM	CD171	R.FFPYAN*GTLGIR@.D	479	1000	2.77964	4	682.863	2	-0.08	2.389	0.284	L1CAM_HUMAN Neural cell adhesion molecule L1
P32004	L1CAM	CD171	K.VPGN*QTSTTLK#.L	671	1000	4.31317	5	578.813	2	0.14	2.373	0.225	L1CAM_HUMAN Neural cell adhesion molecule L1
P32004	L1CAM	CD171	K.NPVDVK#GEGN*ETTNMVITWK#PLR@.W	726	34.089	4.26324	5	656.599	4	0.6	4.086	0.203	L1CAM_HUMAN Neural cell adhesion molecule L1
P32004	L1CAM	CD171	R.GPWQEQIVSDPFLVVSN*TSTFVPYEIK.V	777	1000	1.54237	4	1028.52	3	0.65	3.22	0.234	L1CAM_HUMAN Neural cell adhesion molecule L1
P32004	L1CAM	CD171	R.GSGPASEFTFSTPEGVPGHPEALHLECQSN*TSLLLR@.W	931	1000	4.92099	4	958.718	4	0.36	4.488	0.359	L1CAM_HUMAN Neural cell adhesion molecule L1
P32004	L1CAM	CD171	R.THN*LTDLSPHLR.Y	979	1000	8.50346	4	703.866	2	-1.2	2.725	0.473	L1CAM_HUMAN Neural cell adhesion molecule L1
P35613	BSG	CD147	K.ILLTCSLN*DSATEVTGHR.W	160	1000	1.15185	2	995.494	2	0.86	4.057	0.546	BASI_HUMAN Basigin
P40189	IL6ST	CD130	R.ETHLETN*FTLK#.S	157	1000	0.577683	3	672.345	2	0.38	2.393	0.385	IL6RB_HUMAN Interleukin-6 receptor subunit beta
P40189	IL6ST	CD130	K.SHLQN*YTVNATK#.L	379	97.748	3.30179	1	693.854	2	0.96	3.699	0.375	IL6RB_HUMAN Interleukin-6 receptor subunit beta
P40189	IL6ST	CD130	K.LTVN*LTNDR@.Y	390	37.54	6.04922	1	527.79	2	0.1	2.155	0.267	IL6RB_HUMAN Interleukin-6 receptor subunit beta
P43121	MCAM	CD146	R.CVASVPSIPGLN*R@.T	418	1000	2.40469	1	689.871	2	0.67	2.128	0.353	MUC18_HUMAN Cell surface glycoprotein MUC18
P48960	CD97	CD97	R.WCPQNSSCVN*ATACR@.C	38	51.004	19.525	6	910.379	2	-0.07	4.036	0.329	CD97_HUMAN CD97 antigen
P48960	CD97	CD97	K.TFK#N*ESENTCQDVDECSSGQHQCDSSTVCFNTVGSYSCR@.C	108	31.769	6.96682	2	1150.21	4	0.23	4.376	0.095	CD97_HUMAN CD97 antigen
P48960	CD97	CD97	R.GDK#N*VTMGQSSAR@.M	371	1000	10.7603	2	684.338	2	1.8	2.393	0.364	CD97_HUMAN CD97 antigen
P48960	CD97	CD97	R.R@LSAVNSIFLSHN*NTK#.E	453	30.835	61.1254	2	606.67	3	0.83	4.932	0.083	CD97_HUMAN CD97 antigen
P50895	BCAM	CD239	R.TQN*FTLLVQGSPELK#.T	439	1000	0.577483	0	843.459	2	0.76	2.89	0.436	Basal cell adhesion molecule (Auberger B antigen) (B-CAM cell surface glycoprotein) (F8/G253 antigen) (Lutheran antigen) (Lutheran blood group glycoprotein) (CD antigen CD239)
P54709	ATP1B3	CD298	K.N*LTVCPDGALFEQK.G	124	1000	5.75115	2	797.887	2	-0.02	2.404	0.354	AT1B3_HUMAN Sodium/potassium-transporting ATPase subunit beta-3
P56199	ITGA1	CD49a	K.VYVYALN*QTR@.F	532	1000	5.84013	0	618.334	2	0.41	2.92	0.453	Integrin alpha-1 (CD49 antigen-like family member A) (Laminin and collagen receptor) (VLA-1) (CD antigen CD49a)
P78325	ADAM8	CD156	R.CCN*STTCQLAEGAQCAHGTCCQECK#.V	436	1000	1.86574	2	1001.37	3	-0.11	5.083	0.71	ADAM8_HUMAN Disintegrin and metalloproteinase domain-containing protein 8
P78536	ADAM17	CD156B	R.EQQLESCACN*ETDNSCK.V	594	44.278	1.28498	1	1038.4	2	-0.19	4.223	0.202	ADA17_HUMAN Disintegrin and metalloproteinase domain-containing protein 17
Q03405	PLAUR	CD87	K.GN*STHGCSSEETFLIDCR@.G	222	1000	2.43311	6	693.63	3	0.58	3.564	0.481	UPAR_HUMAN Urokinase plasminogen activator surface receptor
Q07954	LRP1	CD91	R.FN*STEYQVVTR@.V	446	1000	3.55648	0	676.838	2	0.26	3.358	0.393	Prolow-density lipoprotein receptor-related protein 1 (LRP-1) (Alpha-2-macroglobulin receptor) (A2MR) (Apolipoprotein E receptor) (APOER) (CD antigen CD91) [Cleaved into: Low-density lipoprotein receptor-related protein 1 85 kDa subunit (LRP-85); Low-density lipoprotein receptor-related protein 1 515 kDa subunit (LRP-515); Low-density lipoprotein receptor-related protein 1 intracellular domain (L…
Q07954	LRP1	CD91	K.WTGHN*VTVVQR@.T	1511	1000	1.56401	0	653.348	2	-0.77	2.759	0.422	Prolow-density lipoprotein receptor-related protein 1 (LRP-1) (Alpha-2-macroglobulin receptor) (A2MR) (Apolipoprotein E receptor) (APOER) (CD antigen CD91) [Cleaved into: Low-density lipoprotein receptor-related protein 1 85 kDa subunit (LRP-85); Low-density lipoprotein receptor-related protein 1 515 kDa subunit (LRP-515); Low-density lipoprotein receptor-related protein 1 intracellular domain (L…
Q07954	LRP1	CD91	R.MHLN*GSNVQVLHR@.T	3089	73.311	3.02314	0	757.399	2	1.54	4.287	0.261	Prolow-density lipoprotein receptor-related protein 1 (LRP-1) (Alpha-2-macroglobulin receptor) (A2MR) (Apolipoprotein E receptor) (APOER) (CD antigen CD91) [Cleaved into: Low-density lipoprotein receptor-related protein 1 85 kDa subunit (LRP-85); Low-density lipoprotein receptor-related protein 1 515 kDa subunit (LRP-515); Low-density lipoprotein receptor-related protein 1 intracellular domain (L…
Q08722	CD47	CD47	K.GRDIYTFDGALN*K.S	73	1000	2.3365	3	736.867	2	0.14	2.978	0.281	CD47_HUMAN Leukocyte surface antigen CD47
Q08722	CD47	CD47	K.SDAVSHTGN*YTCEVTELTR@.E	111	1000	1.96285	3	1074.99	2	1.09	4.396	0.639	CD47_HUMAN Leukocyte surface antigen CD47
Q10589	BST2	CD317	R.N*VTHLLQQELTEAQK#.G	65	1000	9.00296	1	881.97	2	0.36	4.728	0.404	BST2_HUMAN Bone marrow stromal antigen 2
Q10589	BST2	CD317	K.GFQDVEAQAATCN*HTVMALMASLDAEK#.A	92	1000	1.23358	1	973.781	3	-0.16	3.395	0.295	BST2_HUMAN Bone marrow stromal antigen 2
Q12913	PTPRJ	CD148	K.IHVAGETDSSNLN*VSEPR@.A	413	76.733	5.86589	1	645.319	3	-0.98	5.313	0.044	PTPRJ_HUMAN Receptor-type tyrosine-protein phosphatase eta
Q12913	PTPRJ	CD148	R.NTCTTGITDPPPPDGSPN*ITSVSHNSVK#.V	824	28.218	5.52395	0	968.794	3	0.37	3.137	0.31	PTPRJ_HUMAN Receptor-type tyrosine-protein phosphatase eta
Q13740	ALCAM	CD166	K.DRLNLSEN*YTLSISNAR.I	95	97.748	3.13616	3	984.992	2	-5.21	4.758	0.306	CD166_HUMAN CD166 antigen
Q13740	ALCAM	CD166	K.LGDCISEDSYPDGN*ITWYR.N	167	1000	3.48438	2	1132.49	2	-0.74	3.063	0.643	CD166_HUMAN CD166 antigen
Q13740	ALCAM	CD166	K.NAIK#EGDN*ITLK#.C	265	87.265	0.519808	2	667.873	2	0.29	2.998	0.521	CD166_HUMAN CD166 antigen
Q13740	ALCAM	CD166	K.IIISPEEN*VTLTCTAENQLER.T	480	120.756	3.97747	4	1217.11	2	1.32	4.041	0.545	CD166_HUMAN CD166 antigen
Q13740	ALCAM	CD166	R.TVNSLN*VSANENR@.E	499	53.534	2.68356	0	713.859	2	0.2	3.211	0.323	CD166_HUMAN CD166 antigen
Q15223	PVRL1	CD111	R.NPN*GTVTVISR@.Y	202	36.655	1.55863	2	583.821	2	-1.27	2.258	0.351	Poliovirus receptor-related protein 1 (Herpes virus entry mediator C) (Herpesvirus entry mediator C) (HveC) (Herpesvirus Ig-like receptor) (HIgR) (Nectin-1) (CD antigen CD111)
Q5ZPR3	CD276	CD276	K.QLVHSFAEGQDQGSAYAN*R@.T	91	1000	0.385165	8	1043.99	2	-0.25	4.435	0.673	CD276_HUMAN CD276 antigen
Q5ZPR3	CD276	CD276	R.TALFPDLLAQGN*ASLR@.L	104	1000	0.69508	8	848.467	2	0.17	2.437	0.367	CD276_HUMAN CD276 antigen
Q5ZPR3	CD276	CD276	R.VVLGAN*GTYSCLVR.N	215	1000	0.540494	6	756.393	2	0.44	3.049	0.614	CD276_HUMAN CD276 antigen
Q92854	SEMA4D	CD100	R.AAN*YTSSLNLPDK#.T	379	87.265	2.46579	2	702.853	2	0.13	2.965	0.556	SEM4D_HUMAN Semaphorin-4D
Q969P0	IGSF8	CD316	R.IGPGEPLELLCN*VSGALPPAGR@.H	327	1000	1.61133	1	1113.59	2	1.02	4.923	0.537	IGSF8_HUMAN Immunoglobulin superfamily member 8
Q9H5V8	CDCP1	CD318	R.IGTFCSN*GTVSR@.I	180	1000	9.122	1	654.316	2	0.46	3.026	0.536	CDCP1_HUMAN CUB domain-containing protein 1
Q9H5V8	CDCP1	CD318	R.N*VSGFSIANR@.S	205	139.126	4.67106	2	537.282	2	0.77	2.475	0.267	CDCP1_HUMAN CUB domain-containing protein 1
Q9H5V8	CDCP1	CD318	R.ASVSFLNFN*LSNCER@.K	270	30.835	1.95796	2	883.921	2	-0.32	3.856	0.213	CDCP1_HUMAN CUB domain-containing protein 1
Q9H5V8	CDCP1	CD318	R.TCSSN*LTLTSGSK#.H	386	1000	5.06742	1	683.828	2	0	2.111	0.37	CDCP1_HUMAN CUB domain-containing protein 1
Q9NQS3	PVRL3	CDw113	R.LDGQWPDGLLASDNTLHFVHPLTFN*YSGVYICK#.V	331	32.925	1.34588	3	947.964	4	-1.01	3.931	0.32	PVRL3_HUMAN Poliovirus receptor-related protein 3
Q9NZQ7	CD274	CD274	R.R@LDPEEN*HTAELVIPELPLAHPPNER@.T	219	179.741	2.36518	1	751.147	4	-0.04	4.286	0.379	PD1L1_HUMAN Programmed cell death 1 ligand 1
Q9P2B2	PTGFRN	CD315	K.ELDLTCN*ITTDR.A	300	1000	0.180097	0	727.34	2	0.23	2.067	0.434	Prostaglandin F2 receptor negative regulator (CD9 partner 1) (CD9P-1) (Glu-Trp-Ile EWI motif-containing protein F) (EWI-F) (Prostaglandin F2-alpha receptor regulatory protein) (Prostaglandin F2-alpha receptor-associated protein) (CD antigen CD315)
Q9P2B2	PTGFRN	CD315	K.ENSGYYYCHVSLWAPGHN*R.S	383	84.892	0.331769	0	771.672	3	-1.1	2.736	0.484	Prostaglandin F2 receptor negative regulator (CD9 partner 1) (CD9P-1) (Glu-Trp-Ile EWI motif-containing protein F) (EWI-F) (Prostaglandin F2-alpha receptor regulatory protein) (Prostaglandin F2-alpha receptor-associated protein) (CD antigen CD315)
Q9P2B2	PTGFRN	CD315	R.YSVLIMAEKPVGDLSSPN*ETK.Y	600	1000	0.0533803	0	761.056	3	0.07	3.011	0.42	Prostaglandin F2 receptor negative regulator (CD9 partner 1) (CD9P-1) (Glu-Trp-Ile EWI motif-containing protein F) (EWI-F) (Prostaglandin F2-alpha receptor regulatory protein) (Prostaglandin F2-alpha receptor-associated protein) (CD antigen CD315)
Q9UBG0	MRC2	CD280	R.VTPACN*TSLPAQR@.W	69	1000	4.88159	0	712.364	2	1.8	2.974	0.557	MRC2_HUMAN C-type mannose receptor 2
Q9UBG0	MRC2	CD280	R.TSN*ISKPGTLER.G	140	1000	7.16417	0	653.349	2	0.84	2.274	0.346	MRC2_HUMAN C-type mannose receptor 2

## Sheet: Description
Column Heading	Description
UniProt name	UniProt symbol of the protein
Gene symbol	Gene symbol for the assigned N-sialoglycoprotein
CD	Name of the cluster of differentiation
Sequence	Sequence of the N-sialoglycopeptide obtained by ModScore, *-N-sialoglycosylation site; ^-methionine oxidation; @-heavy isotope labled arginine; #-heavy isotope labled lysine
Site	The quantified N-sialoglycosylation site location, as determined by ModScore
ModScore	Best ModScore matching the indicated N-sialoglycosylation site
Peptide ratio	Peptide ratio between MDA-MB-231 and MCF-7 cells
Redun	Number of proteins to which this sequence may be matched
Obs m/z	Observed mass-to-charge ratio of the indicated peptide
z	Charge state of the peptide
ppm	Mass accuracy of the peptide
XCorr	SEQUEST XCorr
Delta Corr	SEQUEST delta Cn score
