# Supplementary material for: Systematic and site-specific analysis of N-sialoglycosylated proteins on the cell surface by integrating click chemistry and MS-based proteomics
Source: Royal Society of Chemistry journal article supplement (doi:10.1039/c5sc01124h), 2015-01-01
Supplement: c5sc01124h7.xlsx [file c5sc01124h7.xlsx]

## Sheet: Secretome
Table S2. Identification of 128 unique sites on N-sialoglycoproteins in the secretome of HEK293T cells
UniProt name	Gene symbol	Site	ModScore	Sequence	XCorr	ppm	Obs m/z	z	Local sequence	Count	Annotation
A0AVL1	ADAM9	144	1000	R.GLLHLEN*ASYGIEPLQN*SSHFEHIIYR.M	3.183	0.13	629.517	5	GLLHLENASYGIE	1	ADAM9 protein (Disintegrin and metalloproteinase domain-containing protein 9)
A0AVL1	ADAM9	154	1000	R.GLLHLEN*ASYGIEPLQN*SSHFEHIIYR.M	3.183	0.13	629.517	5	GIEPLQNSSHFEH	1	ADAM9 protein (Disintegrin and metalloproteinase domain-containing protein 9)
A2RUB1	C17orf104	512	7.71	R.NQGNLMKLNSHLSAASKGSN*HSSDFPQLSSTN*LTPNSNLFQK.Y	3.553	-12.12	1130.79	4	AASKGSNHSSDFP	1	Uncharacterized protein C17orf104
A2RUB1	C17orf104	524	5.31	R.NQGNLMKLNSHLSAASKGSN*HSSDFPQLSSTN*LTPNSNLFQK.Y	3.553	-12.12	1130.79	4	PQLSSTNLTPNSN	1	Uncharacterized protein C17orf104
A6NHF2	BTD	351	80.165	K.NPVGLIGAEN*ATGETDPSHSK.F	3.618	-0.09	699.671	3	GLIGAENATGETD	3	Biotinidase (cDNA FLJ59679, highly similar to Biotinidase (EC 3.5.1.12))
A6QRJ1	ATP6AP1	170	1000	R.ELKLN*ASLPALLLIR.L	3.292	0.11	556.35	3	LRELKLNASLPAL	3	V-type proton ATPase subunit S1 (Fragment)
B3KUE5	PLTP	84	1000	K.EGHFYYN*ISEVK.V	2.5	-1.61	744.847	2	EGHFYYNISEVKV	2	Phospholipid transfer protein (Phospholipid transfer protein, isoform CRA_c) (cDNA FLJ39690 fis, clone SMINT2010639, highly similar to PHOSPHOLIPID TRANSFER PROTEIN)
B3KUE5	PLTP	418	1000	R.IYSN*HSALESLALIPLQAPLK.T	2.917	0.16	571.073	4	RFRIYSNHSALES	3	Phospholipid transfer protein (Phospholipid transfer protein, isoform CRA_c) (cDNA FLJ39690 fis, clone SMINT2010639, highly similar to PHOSPHOLIPID TRANSFER PROTEIN)
B4DN26	PLAT	394	1000	R.CTSQHLLN*R.T	2.867	0.31	566.277	2	TSQHLLNRTVTDN	1	Tissue-type plasminogen activator chain A (cDNA FLJ59355, highly similar to Tissue-type plasminogen activator (EC 3.4.21.68))
B4DTT5	FSTL1	109	1000	K.GSN*YSEILDKYFK.N	3.313	-0.12	783.882	2	WFSKGSNYSEILD	1	Follistatin-related protein 1 (cDNA FLJ50214, highly similar to Follistatin-related protein 1)
B4DTT5	FSTL1	140	140.984	K.FVEQN*ETAIN*ITTYPDQENNK.L	4.321	3.14	1237.57	2	LKFVEQNETAINI	1	Follistatin-related protein 1 (cDNA FLJ50214, highly similar to Follistatin-related protein 1)
B4DTT5	FSTL1	145	80.999	K.FVEQN*ETAIN*ITTYPDQENNK.L	4.321	3.14	1237.57	2	QNETAINITTYPD	1	Follistatin-related protein 1 (cDNA FLJ50214, highly similar to Follistatin-related protein 1)
B5MCZ9	QPCT	247	1000	R.YFQN*YSYGGVIQDDHIPFLR.R	3.907	1.18	1218.08	2	EGRYFQNYSYGGV	2	Glutaminyl-peptide cyclotransferase (Fragment)
B7Z4K6	DNASE2	157	1000	K.GHHVSQEPWN*SSITLTSQAGAVFQSFAK.F	4.138	0.69	755.122	4	VSQEPWNSSITLT	1	Deoxyribonuclease-2-alpha (cDNA FLJ51996, highly similar to Deoxyribonuclease-2-alpha (EC 3.1.22.1))
B7Z909	HYOU1	428	1000	R.VFGSQN*LTTVK.L	2.917	0.16	598.824	2	RVFGSQNLTTVKL	1	Hypoxia up-regulated protein 1 (cDNA FLJ54708, highly similar to 150 kDa oxygen-regulated protein (Orp150))
B7ZMG0	PTPRK	462	80.102	K.APQHVVNHLPPYTN*VSLK.M	2.988	0.13	505.024	4	HLPPYTNVSLKMI	1	PTPRK protein (Receptor-type tyrosine-protein phosphatase kappa)
C9IYS6	SEMA3F	53	84.609	K.ATGTAHFFNFLLN*TTDYR.I	3.003	-0.25	698.005	3	FFNFLLNTTDYRI	1	Semaphorin-3F (Fragment)
C9JE88	CPE	27	51.572	K.GN*ETIVNLIHSTR.I	2.987	0.89	486.26	3	NEYQKGNETIVNL	1	Carboxypeptidase E (Fragment)
C9JN98	SERPINE2	159	9.911	R.NVNFEDPASACDSINAWVKN*ETR.D	3.187	1.23	880.735	3	INAWVKNETRDMI	1	Glia-derived nexin (Fragment)
C9JYM4	GOLM1	109	9.34	K.AVLVNN*ITTGER.L	2.915	-0.06	645.351	2	KAVLVNNITTGER	1	Golgi membrane protein 1 (Fragment)
D6RBV2	LMAN2	183	0	R.VFPYISVMVNN*GSLSYDHSK.D	3.004	2.03	1130.55	2	ISVMVNNGSLSYD	4	Vesicular integral-membrane protein VIP36
D6RGZ6	VCAN	330	1000	R.FEN*QTGFPPPDSR.F	2.855	1.49	747.842	2	TLYRFENQTGFPP	4	Versican core protein (Fragment)
E2QRK0	LAMA5	95	1000	K.LVGGPVAGGDPN*QTIR.G	3.109	-0.15	777.412	2	VAGGDPNQTIRGQ	1	Laminin subunit alpha-5
E5RFQ2	LAMA4	315	33.657	R.HVNEIN*ATIYLLK.T	3.731	-0.36	510.952	3	RHVNEINATIYLL	1	Laminin subunit alpha-4 (Fragment)
E5RGB0	CLU	86	1000	K.KKEDALN*ETR.E	2.812	-0.25	402.878	3	KKEDALNETRESE	2	Clusterin beta chain (Fragment)
E7ERK6	CLU	145	50.102	R.QLEEFLN*QSSPFYFWMN*GDRIDSLLENDR.Q	4.117	-3.5	1190.54	3	QLEEFLNQSSPFY	2	Clusterin beta chain (Fragment)
E7ERK6	CLU	155	38.776	R.QLEEFLN*QSSPFYFWMN*GDRIDSLLENDR.Q	4.117	-3.5	1190.54	3	PFYFWMNGDRIDS	2	Clusterin beta chain (Fragment)
E7EX60	NRP1	522	24.437	K.IGYSNN*GSDWK.M	3.296	0	622.277	2	KIGYSNNGSDWKM	1	Neuropilin-1
E9PC84	TNC	788	6.591	R.QTGLAPGQEYEISLHIVKN*NTR.G	3.2	0.06	618.575	4	SLHIVKNNTRGPG	1	Tenascin
E9PC84	TNC	1018	1000	R.LN*YSLPTGQWVGVQLPR.N	3.148	0.31	966.018	2	FDRYRLNYSLPTG	1	Tenascin
E9PC84	TNC	1392	1000	K.VEAAQN*LTLPGSLR.A	2.615	0.53	736.404	2	KVEAAQNLTLPGS	1	Tenascin
E9PEV0	APP	432	8.463	R.M^N*QSLSLLYNVPAVAEEIQDEVDELLQK.E	3.735	-1.49	1069.87	3	VIYERMNQSLSLL	2	Gamma-secretase C-terminal fragment 59
E9PIA8	PPT1	122	32.892	R.LVQAEYWHDPIKEDVYRN*HSIFLADINQER.G	3.563	1.73	1234.61	3	KEDVYRNHSIFLA	2	Palmitoyl-protein thioesterase 1 (Fragment)
E9PIA8	PPT1	157	1000	K.FLN*DSIVDPVDSEWFGFYR.S	4.803	1.46	1155.04	2	VMVKFLNDSIVDP	1	Palmitoyl-protein thioesterase 1 (Fragment)
F2Z3B8	PTPRF	78	1000	R.KVEVEPLN*STAVHVYWK.L	3.744	-0.75	668.022	3	VEVEPLNSTAVHV	3	Receptor-type tyrosine-protein phosphatase F
F5GZN3	MFGE8	281	44.278	K.VAYSN*DSANWTEYQDPR.T	4.386	0.27	1009.93	2	YKVAYSNDSANWT	3	Lactadherin short form
F5GZS6	SLC3A2	350	27.983	R.LLIAGTN*SSDLQQILSLLESNKDLLLTSSYLSDSGSTGEHTK.S	5.865	-0.13	1113.82	4	LLIAGTNSSDLQQ	3	4F2 cell-surface antigen heavy chain
F8W7G7	FN1	1007	81.692	K.LDAPTNLQFVN*ETDSTVLVR.W	4.076	-1	1118.07	2	TNLQFVNETDSTV	2	Ugl-Y3
G3V5V4	COCH	84	1000	R.VYSLPGREN*YSSVDAN*GIQSQMLSR.W	4.855	1.27	926.445	3	SLPGRENYSSVDA	4	Cochlin (Fragment)
G3V5V4	COCH	91	1000	R.VYSLPGREN*YSSVDAN*GIQSQMLSR.W	4.855	1.27	926.445	3	YSSVDANGIQSQM	4	Cochlin (Fragment)
G3XAI2	LAMB1	1303	1000	K.LSDTTSQSN*STAK.E	3.473	0.02	671.815	2	DTTSQSNSTAKEL	1	Laminin subunit beta-1 (Laminin, beta 1, isoform CRA_a)
G3XAI2	LAMB1	1360	1000	R.VN*ASTTEPN*STVEQSALMR.D	2.795	-0.88	1020.98	2	EAEERVNASTTEP	2	Laminin subunit beta-1 (Laminin, beta 1, isoform CRA_a)
G3XAI2	LAMB1	1367	1000	R.VN*ASTTEPN*STVEQSALMR.D	2.795	-0.88	1020.98	2	ASTTEPNSTVEQS	2	Laminin subunit beta-1 (Laminin, beta 1, isoform CRA_a)
G3XAI2	LAMB1	1511	1000	K.QSAEDILLKTN*ATK.E	3.753	0.2	767.914	2	DILLKTNATKEKM	1	Laminin subunit beta-1 (Laminin, beta 1, isoform CRA_a)
H0Y512	APMAP	145	1000	R.AGPN*GTLFVADAYK.G	2.679	0.59	713.859	2	GIRAGPNGTLFVA	2	Adipocyte plasma membrane-associated protein (Fragment)
H0YAP9	LAMA4	24	5.75	K.LSN*LSNLSHDLVQEAIDHAQDLQQEANELSR.K	4.862	-0.28	1164.24	3	LQVKLSNLSNLSH	2	Laminin subunit alpha-4 (Fragment)
H0YAP9	LAMA4	27	9.296	K.LSNLSN*LSHDLVQEAIDHAQDLQQEANELSR.K	3.612	1.27	873.43	4	KLSNLSNLSHDLV	1	Laminin subunit alpha-4 (Fragment)
H0YAS8	CLU	45	64.654	K.MLN*TSSLLEQLNEQFNWVSR.L	4.669	0.64	804.73	3	YQWKMLNTSSLLE	4	Clusterin beta chain (Fragment)
H0YAS8	CLU	65	1000	R.LAN*LTQGEDQYYLR.V	2.822	0.14	843.915	2	WVSRLANLTQGED	6	Clusterin beta chain (Fragment)
H0YBB2	COL14A1	129	64.398	R.SFMVN*WTHAPGNVEK.Y	3.386	0.97	860.407	2	ARSFMVNWTHAPG	1	Collagen alpha-1(XIV) chain (Fragment)
H7BZM7	ZNF259	223	9.482	K.ELKQVASPFTLIIDDPSGNSFVENPHAPQKDDALVITHYN*R.T	3.801	-5.54	1145.57	4	LVITHYNRTRQQE	1	Zinc finger protein ZPR1 (Fragment)
H7C0X5	CPVL	50	36.556	R.QAIHVGN*QTFNDGTIVEK.Y	3.12	-0.03	658.665	3	QAIHVGNQTFNDG	1	Probable serine carboxypeptidase CPVL (Fragment)
H7C5T9	SERPINI1	30	78.156	K.DAN*LTGLSDNKEIFLSK.A	3.653	2.55	934.483	2	IFIKDANLTGLSD	1	Neuroserpin (Fragment)
I3L4N7	SERPINF1	83	1000	K.VTQN*LTLIEESLTSEFIHDIDR.E	4.195	0.65	859.438	3	PLKVTQNLTLIEE	3	Pigment epithelium-derived factor (Fragment)
J3KQG4	GBA	11	1000	-.MELSMGPIQAN*HTGTGLLLTLQPEQK.F	4.023	0.7	937.483	3	MGPIQANHTGTGL	1	Glucosylceramidase
J3KSI6	DSG2	182	171.488	K.IN*ATDADEPNTLNSK.I	5.259	1.74	803.379	2	TLVMKINATDADE	1	Desmoglein-2
K7EJD3	LGALS3BP	69	1000	R.ALGFEN*ATQALGR.A	3.015	0.05	675.849	2	RALGFENATQALG	2	Galectin-3-binding protein
K7EN15	CANT1	88	24.243	R.LGQAPANWYN*DTYPLSPPQR.T	4.511	0.96	1146.05	2	APANWYNDTYPLS	3	Soluble calcium-activated nucleotidase 1
O00468	AGRN	135	6.931	R.IFFVNPAPPYLWPAHKNELMLN*SSLMR.I	4.025	-0.64	797.913	4	KNELMLNSSLMRI	2	Agrin [Cleaved into: Agrin N-terminal 110 kDa subunit; Agrin C-terminal 110 kDa subunit; Agrin C-terminal 90 kDa fragment (C90); Agrin C-terminal 22 kDa fragment (C22)]
O00754	MAN2B1	766	104.034	K.LN*QTEPVAGNYYPVNTR.I	4.14	-1.19	969.975	2	RPTWKLNQTEPVA	1	Lysosomal alpha-mannosidase (Laman) (EC 3.2.1.24) (Lysosomal acid alpha-mannosidase) (Mannosidase alpha class 2B member 1) (Mannosidase alpha-B) [Cleaved into: Lysosomal alpha-mannosidase A peptide; Lysosomal alpha-mannosidase B peptide; Lysosomal alpha-mannosidase C peptide; Lysosomal alpha-mannosidase D peptide; Lysosomal alpha-mannosidase E peptide]
O14773	TPP1	443	1000	K.FLSSSPHLPPSSYFN*ASGR.A	2.758	0.09	685.334	3	PPSSYFNASGRAY	1	Tripeptidyl-peptidase 1 (TPP-1) (EC 3.4.14.9) (Cell growth-inhibiting gene 1 protein) (Lysosomal pepstatin-insensitive protease) (LPIC) (Tripeptidyl aminopeptidase) (Tripeptidyl-peptidase I) (TPP-I)
O15230	LAMA5	2196	1000	R.GIN*ASSM^AWAR.L	2.79	-0.1	591.776	2	EQLRGINASSMAW	3	Laminin subunit alpha-5 (Laminin-10 subunit alpha) (Laminin-11 subunit alpha) (Laminin-15 subunit alpha)
O15230	LAMA5	2209	1000	R.LN*ASIADLQSQLR.S	2.786	0.27	477.928	3	ARLHRLNASIADL	4	Laminin subunit alpha-5 (Laminin-10 subunit alpha) (Laminin-11 subunit alpha) (Laminin-15 subunit alpha)
O15230	LAMA5	2303	1000	R.TLSELMSQTGHLGLAN*ASAPSGEQLLR.T	3.813	0.24	928.808	3	GHLGLANASAPSG	2	Laminin subunit alpha-5 (Laminin-10 subunit alpha) (Laminin-11 subunit alpha) (Laminin-15 subunit alpha)
O15230	LAMA5	2423	1000	R.DN*ATLQATLHAAR.D	2.664	-0.47	462.24	3	QELSRDNATLQAT	4	Laminin subunit alpha-5 (Laminin-10 subunit alpha) (Laminin-11 subunit alpha) (Laminin-15 subunit alpha)
O15230	LAMA5	2501	66.56	R.LVEAAEAHAQQLGQLALN*LSSIILDVNQDR.L	4.021	0.15	808.932	4	LGQLALNLSSIIL	1	Laminin subunit alpha-5 (Laminin-10 subunit alpha) (Laminin-11 subunit alpha) (Laminin-15 subunit alpha)
O15230	LAMA5	2568	1000	R.AQQLLAN*STALEEAMLQEQQR.L	2.966	-0.44	792.396	3	AQQLLANSTALEE	4	Laminin subunit alpha-5 (Laminin-10 subunit alpha) (Laminin-11 subunit alpha) (Laminin-15 subunit alpha)
O43505	B3GNT1	204	45.026	R.VAQPGINYALGTN*VSYPN*NLLR.N	3.518	1.57	1190.62	2	NYALGTNVSYPNN	1	N-acetyllactosaminide beta-1,3-N-acetylglucosaminyltransferase (EC 2.4.1.149) (I-beta-1,3-N-acetylglucosaminyltransferase) (iGnT) (Poly-N-acetyllactosamine extension enzyme) (UDP-GlcNAc:betaGal beta-1,3-N-acetylglucosaminyltransferase 1)
O60911	CTSV	221	6.039	K.YRPENSVAN*DTGFTVVAPGKEK.A	3.921	0.49	794.733	3	PENSVANDTGFTV	3	Cathepsin L2 (EC 3.4.22.43) (Cathepsin U) (Cathepsin V)
O60911	CTSV	292	7.71	K.NLDHGVLVVGYGFEGANSN*NSK.Y	3.337	1.45	765.37	3	FEGANSNNSKYWL	1	Cathepsin L2 (EC 3.4.22.43) (Cathepsin U) (Cathepsin V)
O94813	SLIT2	66	9.34	R.LDLNGNN*ITR.I	2.877	0.28	566.796	2	LDLNGNNITRITK	1	Slit homolog 2 protein (Slit-2) [Cleaved into: Slit homolog 2 protein N-product; Slit homolog 2 protein C-product]
O94813	SLIT2	794	117.029	R.ISTLSN*QSFSN*MTQLLTLILSYNR.L	4.035	1.02	917.474	3	RISTLSNQSFSNM	1	Slit homolog 2 protein (Slit-2) [Cleaved into: Slit homolog 2 protein N-product; Slit homolog 2 protein C-product]
O94813	SLIT2	799	121.502	R.ISTLSN*QSFSN*MTQLLTLILSYNR.L	4.035	1.02	917.474	3	SNQSFSNMTQLLT	1	Slit homolog 2 protein (Slit-2) [Cleaved into: Slit homolog 2 protein N-product; Slit homolog 2 protein C-product]
P01033	TIMP1	53	1000	R.AKFVGTPEVN*QTTLYQR.Y	3.835	0.68	978.01	2	VGTPEVNQTTLYQ	4	Metalloproteinase inhibitor 1 (Erythroid-potentiating activity) (EPA) (Fibroblast collagenase inhibitor) (Collagenase inhibitor) (Tissue inhibitor of metalloproteinases 1) (TIMP-1)
P01033	TIMP1	101	1000	R.SHN*RSEEFLIAGK.L	3.511	0.38	497.588	3	YFHRSHNRSEEFL	2	Metalloproteinase inhibitor 1 (Erythroid-potentiating activity) (EPA) (Fibroblast collagenase inhibitor) (Collagenase inhibitor) (Tissue inhibitor of metalloproteinases 1) (TIMP-1)
P01137	TGFB1	82	1000	R.LASPPSQGEVPPGPLPEAVLALYN*STR.D	4.691	-0.65	921.819	3	AVLALYNSTRDRV	1	Transforming growth factor beta-1 (TGF-beta-1) [Cleaved into: Latency-associated peptide (LAP)]
P01137	TGFB1	136	1000	K.QSTHSIYMFFN*TSELR.E	3.056	0.55	655.309	3	SIYMFFNTSELRE	1	Transforming growth factor beta-1 (TGF-beta-1) [Cleaved into: Latency-associated peptide (LAP)]
P01892	HLA-A	110	1000	R.GYYN*QSEAGSHTVQR.M	2.299	1.49	567.258	3	TLRGYYNQSEAGS	1	HLA class I histocompatibility antigen, A-2 alpha chain (MHC class I antigen A*2)
P04062	GBA	98	1000	R.RMELSMGPIQAN*HTGTGLLLTLQPEQK.F	4.484	2.24	989.518	3	MGPIQANHTGTGL	1	Glucosylceramidase (EC 3.2.1.45) (Acid beta-glucosidase) (Alglucerase) (Beta-glucocerebrosidase) (Beta-GC) (D-glucosyl-N-acylsphingosine glucohydrolase) (Imiglucerase)
P08581	MET	202	17.848	R.FINFFVGNTIN*SSYFPDHPLHSISVR.R	3.704	-0.99	753.628	4	FVGNTINSSYFPD	2	Hepatocyte growth factor receptor (HGF receptor) (EC 2.7.10.1) (HGF/SF receptor) (Proto-oncogene c-Met) (Scatter factor receptor) (SF receptor) (Tyrosine-protein kinase Met)
P11047	LAMC1	1107	9.34	R.VN*NTLSSQISR.L	3.146	-0.87	611.319	2	DRLQRVNNTLSSQ	3	Laminin subunit gamma-1 (Laminin B2 chain) (Laminin-1 subunit gamma) (Laminin-10 subunit gamma) (Laminin-11 subunit gamma) (Laminin-2 subunit gamma) (Laminin-3 subunit gamma) (Laminin-4 subunit gamma) (Laminin-6 subunit gamma) (Laminin-7 subunit gamma) (Laminin-8 subunit gamma) (Laminin-9 subunit gamma) (S-laminin subunit gamma) (S-LAM gamma)
P11047	LAMC1	1161	86.344	K.VAAAN*VSVTQPESTGDPNN*MTLLAEEARK.L	3.982	1.43	1007.16	3	AKVAAANVSVTQP	1	Laminin subunit gamma-1 (Laminin B2 chain) (Laminin-1 subunit gamma) (Laminin-10 subunit gamma) (Laminin-11 subunit gamma) (Laminin-2 subunit gamma) (Laminin-3 subunit gamma) (Laminin-4 subunit gamma) (Laminin-6 subunit gamma) (Laminin-7 subunit gamma) (Laminin-8 subunit gamma) (Laminin-9 subunit gamma) (S-laminin subunit gamma) (S-LAM gamma)
P11047	LAMC1	1175	6.591	K.VAAAN*VSVTQPESTGDPNN*MTLLAEEARK.L	3.982	1.43	1007.16	3	STGDPNNMTLLAE	1	Laminin subunit gamma-1 (Laminin B2 chain) (Laminin-1 subunit gamma) (Laminin-10 subunit gamma) (Laminin-11 subunit gamma) (Laminin-2 subunit gamma) (Laminin-3 subunit gamma) (Laminin-4 subunit gamma) (Laminin-6 subunit gamma) (Laminin-7 subunit gamma) (Laminin-8 subunit gamma) (Laminin-9 subunit gamma) (S-laminin subunit gamma) (S-LAM gamma)
P11047	LAMC1	1223	84.359	R.TLAGEN*QTAFEIEELNR.K	3.495	0.15	969.471	2	RTLAGENQTAFEI	5	Laminin subunit gamma-1 (Laminin B2 chain) (Laminin-1 subunit gamma) (Laminin-10 subunit gamma) (Laminin-11 subunit gamma) (Laminin-2 subunit gamma) (Laminin-3 subunit gamma) (Laminin-4 subunit gamma) (Laminin-6 subunit gamma) (Laminin-7 subunit gamma) (Laminin-8 subunit gamma) (Laminin-9 subunit gamma) (S-laminin subunit gamma) (S-LAM gamma)
P11047	LAMC1	1241	1000	K.YEQAKN*ISQDLEK.Q	3.167	-0.45	523.594	3	KYEQAKNISQDLE	2	Laminin subunit gamma-1 (Laminin B2 chain) (Laminin-1 subunit gamma) (Laminin-10 subunit gamma) (Laminin-11 subunit gamma) (Laminin-2 subunit gamma) (Laminin-3 subunit gamma) (Laminin-4 subunit gamma) (Laminin-6 subunit gamma) (Laminin-7 subunit gamma) (Laminin-8 subunit gamma) (Laminin-9 subunit gamma) (S-laminin subunit gamma) (S-LAM gamma)
P11047	LAMC1	1380	22.011	R.VNDN*KTAAEEALR.K	2.68	0.28	478.576	3	DRRVNDNKTAAEE	2	Laminin subunit gamma-1 (Laminin B2 chain) (Laminin-1 subunit gamma) (Laminin-10 subunit gamma) (Laminin-11 subunit gamma) (Laminin-2 subunit gamma) (Laminin-3 subunit gamma) (Laminin-4 subunit gamma) (Laminin-6 subunit gamma) (Laminin-7 subunit gamma) (Laminin-8 subunit gamma) (Laminin-9 subunit gamma) (S-laminin subunit gamma) (S-LAM gamma)
P11047	LAMC1	1395	55.37	R.KIPAIN*QTITEANEK.T	3.134	-0.59	558.305	3	RKIPAINQTITEA	3	Laminin subunit gamma-1 (Laminin B2 chain) (Laminin-1 subunit gamma) (Laminin-10 subunit gamma) (Laminin-11 subunit gamma) (Laminin-2 subunit gamma) (Laminin-3 subunit gamma) (Laminin-4 subunit gamma) (Laminin-6 subunit gamma) (Laminin-7 subunit gamma) (Laminin-8 subunit gamma) (Laminin-9 subunit gamma) (S-laminin subunit gamma) (S-LAM gamma)
P12109	COL6A1	212	1000	R.N*FTAADWGQSR.D	2.924	0.03	628.283	2	DHTYRRNFTAADW	2	Collagen alpha-1(VI) chain
P12109	COL6A1	896	49.081	R.ASLQFLQN*YTALASAVDAMDFINDATDVNDALGYVTR.F	4.705	-1.02	1332.97	3	SLQFLQNYTALAS	1	Collagen alpha-1(VI) chain
P12643	BMP2	164	0	R.EQMQDALGNN*SSFHHR.I	2.914	-0.04	469.209	4	QDALGNNSSFHHR	1	Bone morphogenetic protein 2 (BMP-2) (Bone morphogenetic protein 2A) (BMP-2A)
P16870	CPE	390	22.011	R.DLQGNPIAN*ATISVEGIDHDVTSAK.D	3.708	1.16	1284.64	2	QGNPIANATISVE	2	Carboxypeptidase E (CPE) (EC 3.4.17.10) (Carboxypeptidase H) (CPH) (Enkephalin convertase) (Prohormone-processing carboxypeptidase)
P23284	PPIB	148	1000	K.DTN*GSQFFITTVK.T	3.001	0.53	730.862	2	NAGKDTNGSQFFI	2	Peptidyl-prolyl cis-trans isomerase B (PPIase B) (EC 5.2.1.8) (CYP-S1) (Cyclophilin B) (Rotamase B) (S-cyclophilin) (SCYLP)
P24043	LAMA2	1614	1000	K.MLYGLEN*MTQELK.H	3.967	0.4	786.881	2	MLYGLENMTQELK	2	Laminin subunit alpha-2 (Laminin M chain) (Laminin-12 subunit alpha) (Laminin-2 subunit alpha) (Laminin-4 subunit alpha) (Merosin heavy chain)
P24043	LAMA2	2868	1000	R.SKQEGILYVDGASN*R.T	3.534	0.44	547.277	3	YVDGASNRTISPK	2	Laminin subunit alpha-2 (Laminin M chain) (Laminin-12 subunit alpha) (Laminin-2 subunit alpha) (Laminin-4 subunit alpha) (Merosin heavy chain)
P25391	LAMA1	555	6.591	R.HQVSIN*NTAVM^QR.L	2.821	0.46	506.252	3	RHQVSINNTAVMQ	5	Laminin subunit alpha-1 (Laminin A chain) (Laminin-1 subunit alpha) (Laminin-3 subunit alpha) (S-laminin subunit alpha) (S-LAM alpha)
P25391	LAMA1	1717	1000	R.DFTQLHQN*ATLELK.A	3.641	-0.92	830.924	2	FTQLHQNATLELK	1	Laminin subunit alpha-1 (Laminin A chain) (Laminin-1 subunit alpha) (Laminin-3 subunit alpha) (S-laminin subunit alpha) (S-LAM alpha)
P25391	LAMA1	1974	1000	R.KLPGIALELSELRN*K.T	2.412	0.01	562.001	3	ELSELRNKTNRFQ	1	Laminin subunit alpha-1 (Laminin A chain) (Laminin-1 subunit alpha) (Laminin-3 subunit alpha) (S-laminin subunit alpha) (S-LAM alpha)
P25391	LAMA1	2038	1000	R.DVAGLSQELLN*TSASLSR.V	3.934	0.32	621.99	3	LSQELLNTSASLS	1	Laminin subunit alpha-1 (Laminin A chain) (Laminin-1 subunit alpha) (Laminin-3 subunit alpha) (S-laminin subunit alpha) (S-LAM alpha)
P42785	PRCP	47	1000	K.N*YSVLYFQQK.V	2.589	0.27	646.824	2	LPAVAKNYSVLYF	1	Lysosomal Pro-X carboxypeptidase (EC 3.4.16.2) (Angiotensinase C) (Lysosomal carboxypeptidase C) (Proline carboxypeptidase) (Prolylcarboxypeptidase) (PRCP)
P47972	NPTX2	189	1000	R.KVAELEDEKSLLHN*ETSAHR.Q	3.205	-0.33	462.638	5	EKSLLHNETSAHR	2	Neuronal pentraxin-2 (NP2) (Neuronal pentraxin II) (NP-II)
P51654	GPC3	124	23.624	R.HAKN*YTNAMFK.N	3.205	-6.13	443.214	3	VVRHAKNYTNAMF	1	Glypican-3 (GTR2-2) (Intestinal protein OCI-5) (MXR7) [Cleaved into: Secreted glypican-3]
P51654	GPC3	241	22.529	R.IFLQALNLGIEVIN*TTDHLK.F	3.606	0.81	752.423	3	LGIEVINTTDHLK	2	Glypican-3 (GTR2-2) (Intestinal protein OCI-5) (MXR7) [Cleaved into: Secreted glypican-3]
P51884	LUM	127	6.591	K.KLHINHNN*LTESVGPLPK.S	3.752	0.07	672.037	3	LHINHNNLTESVG	2	Lumican (Keratan sulfate proteoglycan lumican) (KSPG lumican)
P55268	LAMB2	1348	72.531	R.RAN*TSALAVPSPVSNSASAR.H	3.045	0.02	653.676	3	EAERRANTSALAV	1	Laminin subunit beta-2 (Laminin B1s chain) (Laminin-11 subunit beta) (Laminin-14 subunit beta) (Laminin-15 subunit beta) (Laminin-3 subunit beta) (Laminin-4 subunit beta) (Laminin-7 subunit beta) (Laminin-9 subunit beta) (S-laminin subunit beta) (S-LAM beta)
Q07954	LRP1	3089	0	R.MHLN*GSNVQVLHR.T	2.76	-1.65	503.26	3	IRRMHLNGSNVQV	1	Prolow-density lipoprotein receptor-related protein 1 (LRP-1) (Alpha-2-macroglobulin receptor) (A2MR) (Apolipoprotein E receptor) (APOER) (CD antigen CD91) [Cleaved into: Low-density lipoprotein receptor-related protein 1 85 kDa subunit (LRP-85); Low-density lipoprotein receptor-related protein 1 515 kDa subunit (LRP-515); Low-density lipoprotein receptor-related protein 1 intracellular domain (L…
Q08380	LGALS3BP	580	1000	R.TVIRPFYLTN*SSGVD.-	3.085	0.3	836.428	2	RPFYLTNSSGVD	1	Galectin-3-binding protein (Basement membrane autoantigen p105) (Lectin galactoside-binding soluble 3-binding protein) (Mac-2-binding protein) (MAC2BP) (Mac-2 BP) (Tumor-associated antigen 90K)
Q12860	CNTN1	494	1000	R.GKAN*STGTLVITDPTR.I	3.992	1.4	817.437	2	NNRGKANSTGTLV	1	Contactin-1 (Glycoprotein gp135) (Neural cell surface protein F3)
Q14118	DAG1	141	1000	R.LGAN*GSHIPQTSSVFSIEVYPEDHSELQSVR.T	4.611	-0.77	847.414	4	ATRLGANGSHIPQ	3	Dystroglycan (Dystrophin-associated glycoprotein 1) [Cleaved into: Alpha-dystroglycan (Alpha-DG); Beta-dystroglycan (Beta-DG)]
Q14126	DSG2	462	1000	R.YVQN*GTYTVK.I	2.546	0.99	588.296	2	ESRYVQNGTYTVK	1	Desmoglein-2 (Cadherin family member 5) (HDGC)
Q14517	FAT1	1940	1000	K.TGALTVQN*TTQLR.S	3.203	1.54	703.381	2	GALTVQNTTQLRS	1	Protocadherin Fat 1 (Cadherin family member 7) (Cadherin-related tumor suppressor homolog) (Protein fat homolog) [Cleaved into: Protocadherin Fat 1, nuclear form]
Q14703	MBTPS1	939	33.657	R.LSWAKPQPLN*ETAPSNLWK.H	3.713	-0.08	1092.07	2	AKPQPLNETAPSN	1	Membrane-bound transcription factor site-1 protease (EC 3.4.21.112) (Endopeptidase S1P) (Subtilisin/kexin-isozyme 1) (SKI-1)
Q14766	LTBP1	347	1000	R.YVQDQVAAPFQLSN*HTGR.I	5.005	0.84	1017.5	2	APFQLSNHTGRIK	1	Latent-transforming growth factor beta-binding protein 1 (LTBP-1) (Transforming growth factor beta-1-binding protein 1) (TGF-beta1-BP-1)
Q16363	LAMA4	810	1000	K.RPASN*VSASIQR.I	3.364	0.24	430.233	3	QKRPASNVSASIQ	1	Laminin subunit alpha-4 (Laminin-14 subunit alpha) (Laminin-8 subunit alpha) (Laminin-9 subunit alpha)
Q16769	QPCT	49	61.325	K.NYHQPAILN*SSALR.Q	2.786	-0.92	793.911	2	HQPAILNSSALRQ	1	Glutaminyl-peptide cyclotransferase (EC 2.3.2.5) (Glutaminyl cyclase) (QC) (sQC) (Glutaminyl-tRNA cyclotransferase) (Glutamyl cyclase) (EC)
Q32P28	LEPRE1	540	1000	K.VPLQSAHLYYN*VTEK.V	3.946	-0.48	882.956	2	SAHLYYNVTEKVR	1	Prolyl 3-hydroxylase 1 (EC 1.14.11.7) (Growth suppressor 1) (Leucine- and proline-enriched proteoglycan 1) (Leprecan-1)
Q5SZK8	FREM2	1584	0	K.FTITQVPIHGHLLFN*NTRPVMVFTK.Q	3.111	0.57	583.52	5	HGHLLFNNTRPVM	1	FRAS1-related extracellular matrix protein 2 (ECM3 homolog)
Q6ZRP7	QSOX2	266	3.63	K.LGVSSVPSCYLIYPN*GSHGLINVVKPLR.A	3.431	0.24	761.414	4	CYLIYPNGSHGLI	1	Sulfhydryl oxidase 2 (EC 1.8.3.2) (Neuroblastoma-derived sulfhydryl oxidase) (Quiescin Q6-like protein 1)
Q7Z6V2	FUCA2	56	1000	R.SQN*DTVTPDVWYTSKPK.E	3.399	-5.88	984.97	2	HTWRSQNDTVTPD	1	Plasma alpha-L-fucosidase (Fragment)
Q8NBJ4	GOLM1	144	15.007	R.LQQDVLQFQKN*QTNLER.K	3.028	-0.09	702.367	3	VLQFQKNQTNLER	1	Golgi membrane protein 1 (Golgi membrane protein GP73) (Golgi phosphoprotein 2)
Q9BXX0	EMILIN2	275	1000	K.DTLKN*KSDKLEELDGK.V	2.871	0.01	459.743	4	VKDTLKNKSDKLE	1	EMILIN-2 (Elastin microfibril interface-located protein 2) (Elastin microfibril interfacer 2) (Protein FOAP-10)
Q9BXX0	EMILIN2	616	3.701	K.LQQDFSFLYSQLN*HTENDVTHLQK.E	4.455	0.94	727.856	4	FLYSQLNHTENDV	1	EMILIN-2 (Elastin microfibril interface-located protein 2) (Elastin microfibril interfacer 2) (Protein FOAP-10)
Q9HAT2	SIAE	401	1000	R.ALAYGEKN*LTFEGPLPEKIELLAHK.G	3.672	0.19	557.707	5	LAYGEKNLTFEGP	1	Sialate O-acetylesterase (EC 3.1.1.53) (H-Lse) (Sialic acid-specific 9-O-acetylesterase)
Q9NRA1	PDGFC	55	1000	R.IITVSTN*GSIHSPR.F	3.126	-0.16	742.901	2	IITVSTNGSIHSP	1	Platelet-derived growth factor C (PDGF-C) (Fallotein) (Spinal cord-derived growth factor) (SCDGF) (VEGF-E) [Cleaved into: Platelet-derived growth factor C, latent form (PDGFC latent form); Platelet-derived growth factor C, receptor-binding form (PDGFC receptor-binding form)]
Q9NY97	B3GNT2	173	24.243	R.ESWGQESNAGN*QTVVR.V	4.098	0.46	882.906	2	QESNAGNQTVVRV	1	UDP-GlcNAc:betaGal beta-1,3-N-acetylglucosaminyltransferase 2 (BGnT-2) (Beta-1,3-Gn-T2) (Beta-1,3-N-acetylglucosaminyltransferase 2) (Beta3Gn-T2) (EC 2.4.1.-) (Beta-1,3-N-acetylglucosaminyltransferase 1) (BGnT-1) (Beta-1,3-Gn-T1) (Beta3Gn-T1) (Beta-1,3-galactosyltransferase 7) (Beta-1,3-GalTase 7) (Beta3Gal-T7) (Beta3GalT7) (b3Gal-T7) (Beta-3-Gx-T7) (UDP-Gal:beta-GlcNAc beta-1,3-galactosyltransfe…
Q9ULF5	SLC39A10	191	13.38	R.LHHHLDHN*NTHHFHN*DSITPSER.G	3.736	-0.73	701.071	4	HHHLDHNNTHHFH	1	Zinc transporter ZIP10 (Solute carrier family 39 member 10) (Zrt- and Irt-like protein 10) (ZIP-10)
Q9ULF5	SLC39A10	198	23.012	R.LHHHLDHN*NTHHFHN*DSITPSER.G	3.736	-0.73	701.071	4	NTHHFHNDSITPS	1	Zinc transporter ZIP10 (Solute carrier family 39 member 10) (Zrt- and Irt-like protein 10) (ZIP-10)
Q9UNW1	MINPP1	242	1000	K.FLTEVEKN*ATALYHVEAFK.T	3.475	0.36	554.04	4	LTEVEKNATALYH	1	Multiple inositol polyphosphate phosphatase 1 (EC 3.1.3.62) (2,3-bisphosphoglycerate 3-phosphatase) (2,3-BPG phosphatase) (EC 3.1.3.80) (Inositol (1,3,4,5)-tetrakisphosphate 3-phosphatase) (Ins(1,3,4,5)P(4) 3-phosphatase)
Q9Y4K0	LOXL2	644	9.296	R.HYHSMEVFTHYDLLNLN*GTK.V	3.905	-0.8	606.29	4	YDLLNLNGTKVAE	3	Lysyl oxidase homolog 2 (EC 1.4.3.13) (Lysyl oxidase-like protein 2) (Lysyl oxidase-related protein 2) (Lysyl oxidase-related protein WS9-14)

## Sheet: description
Column Heading	Description
UniProt name	UniProt symbol of the protein
Gene symbol	Gene symbol for the assigned N-sialoglycoprotein
Site	The N-sialoglycosylation site
ModScore	Score matching the indicated N-sialoglycosylation site
Sequence	Sequence of the N-sialoglycopeptide obtained by ModScore, *-N-sialoglycosylation site; ^-methionine oxidation;
XCorr	SEQUEST XCorr
ppm	Mass accuracy of the peptide
Obs m/z	Observed mass-to-charge ratio of the indicated peptide
z	Charge state of the peptide
Local sequence	Local sequence of the glycosylation site
Count	Number of times the sialoglycopeptide was identified
Annotation	Description of the protein function
