# Supplementary material for: Systematic and site-specific analysis of N-sialoglycosylated proteins on the cell surface by integrating click chemistry and MS-based proteomics
Source: Royal Society of Chemistry journal article supplement (doi:10.1039/c5sc01124h), 2015-01-01
Supplement: c5sc01124h8.xlsx [file c5sc01124h8.xlsx]

## Sheet: Membrane
Table S3. Identification of 1,120 N-sialoglycosylation sites on membrane proteins in HEK293T cells
UniProt name	Gene symbol	Site	ModScore	Sequence	XCorr	ppm	Obs m/z	z	Local sequence	Count	Annotation
E7EU84	ABCA2	1579	1000	K.SPAN*GSLGPTLN*LSSGESR.L	4.386	1.27	925.45	2	VLKSPANGSLGPT	2	ATP-binding cassette sub-family A member 2
E7EU84	ABCA2	1587	1000	K.SPAN*GSLGPTLN*LSSGESR.L	4.386	1.27	925.45	2	SLGPTLNLSSGES	2	ATP-binding cassette sub-family A member 2
Q9UNQ0	ABCG2	596	14.669	R.YGFTALQHNEFLGQNFCPGLN*ATGNNPCNYATCTGEEYLVK.Q	6.034	-0.7	1169.02	4	NFCPGLNATGNNP	1	ATP-binding cassette sub-family G member 2 (Breast cancer resistance protein) (CDw338) (Mitoxantrone resistance-associated protein) (Placenta-specific ATP-binding cassette transporter) (Urate exporter) (CD antigen CD338)
C9IZX5	ABHD10	89	1000	K.SPGIIFIPGYLSYMN*GTK.A	4.368	-0.32	981.002	2	GYLSYMNGTKALA	2	Mycophenolic acid acyl-glucuronide esterase, mitochondrial
F6X3S4	ACE	24	36.556	R.KFDVNQLQN*TTIKR.I	2.614	0.11	569.981	3	DVNQLQNTTIKRI	1	Angiotensin-converting enzyme
F5H1K1	ACE	146	9.296	K.RQQYNALLSN*MSR.I	2.859	-0.02	792.396	2	YNALLSNMSRIYS	1	Angiotensin-converting enzyme
B7Z6U3	ACP2	92	1000	R.YHGFLN*TSYHR.Q	1.749	-0.02	350.168	4	RYHGFLNTSYHRQ	7	Lysosomal acid phosphatase (cDNA FLJ51107, highly similar to Lysosomal acid phosphatase (EC 3.1.3.2))
B7Z6U3	ACP2	133	0	R.FNPN*ISWQPIPVHTVPITEDR.Q	3.072	1.43	1232.13	2	MQRFNPNISWQPI	3	Lysosomal acid phosphatase (cDNA FLJ51107, highly similar to Lysosomal acid phosphatase (EC 3.1.3.2))
B7Z7D2	ACP2	145	1000	R.QTPEYQN*ESSR.N	2.089	0.83	671.294	2	QTPEYQNESSRNA	2	Lysosomal acid phosphatase (cDNA FLJ51131, highly similar to Lysosomal acid phosphatase (EC 3.1.3.2))
Q04771	ACVR1	102	0	K.TPPSPGQAVECCQGDWCNRN*ITAQLPTK.G	2.367	-1.78	797.865	4	GDWCNRNITAQLP	2	Activin receptor type-1 (EC 2.7.11.30) (Activin receptor type I) (ACTR-I) (Activin receptor-like kinase 2) (ALK-2) (Serine/threonine-protein kinase receptor R1) (SKR1) (TGF-B superfamily receptor type I) (TSR-I)
B4DU28	ADAM10	250	7.413	R.EGICN*GFTALCPASDPKPN*FTDCNR.H	3.978	-0.21	949.743	3	ASDPKPNFTDCNR	4	Disintegrin and metalloproteinase domain-containing protein 10 (cDNA FLJ57594, highly similar to ADAM 10 (EC 3.4.24.81) (Adisintegrin and metalloproteinase domain 10))
Q13444	ADAM15	237	1000	K.YRDFQHLLN*R.T	1.916	0.03	455.57	3	DFQHLLNRTLEVA	3	Disintegrin and metalloproteinase domain-containing protein 15 (ADAM 15) (EC 3.4.24.-) (Metalloprotease RGD disintegrin protein) (Metalloproteinase-like, disintegrin-like, and cysteine-rich protein 15) (MDC-15) (Metargidin)
Q13444	ADAM15	392	37.54	K.TCIMEASTDFLPGLNFSN*CSR.R	5.138	-0.52	1212.03	2	PGLNFSNCSRRAL	1	Disintegrin and metalloproteinase domain-containing protein 15 (ADAM 15) (EC 3.4.24.-) (Metalloprotease RGD disintegrin protein) (Metalloproteinase-like, disintegrin-like, and cysteine-rich protein 15) (MDC-15) (Metargidin)
P78536	ADAM17	539	1000	K.CQEAIN*ATCK.G	2.53	-4.52	599.257	2	KCQEAINATCKGV	5	Disintegrin and metalloproteinase domain-containing protein 17 (ADAM 17) (EC 3.4.24.86) (Snake venom-like protease) (TNF-alpha convertase) (TNF-alpha-converting enzyme) (CD antigen CD156b)
P78536	ADAM17	551	32.218	K.GVSYCTGN*SSECPPPGNAEDDTVCLDLGK.C	2.855	-0.59	1034.77	3	VSYCTGNSSECPP	2	Disintegrin and metalloproteinase domain-containing protein 17 (ADAM 17) (EC 3.4.24.86) (Snake venom-like protease) (TNF-alpha convertase) (TNF-alpha-converting enzyme) (CD antigen CD156b)
P78536	ADAM17	594	31.275	R.EQQLESCACN*ETDNSCK.V	4.382	0.5	1038.4	2	LESCACNETDNSC	2	Disintegrin and metalloproteinase domain-containing protein 17 (ADAM 17) (EC 3.4.24.86) (Snake venom-like protease) (TNF-alpha convertase) (TNF-alpha-converting enzyme) (CD antigen CD156b)
E7ENW4	ADAM19	647	1000	R.N*TSFFETEGCGKK.C	2.658	0.25	754.335	2	FEGQCRNTSFFET	1	Disintegrin and metalloproteinase domain-containing protein 19
F8WAD8	ADAM22	486	1.809	R.EAVNDCDIRETCSGN*SSQCAPNIHK.M	1.938	-0.75	717.057	4	RETCSGNSSQCAP	5	Disintegrin and metalloproteinase domain-containing protein 22 (Fragment)
O00468	AGRN	135	88.444	K.NELMLN*SSLMR.I	2.397	0.31	655.82	2	KNELMLNSSLMRI	1	Agrin [Cleaved into: Agrin N-terminal 110 kDa subunit; Agrin C-terminal 110 kDa subunit; Agrin C-terminal 90 kDa fragment (C90); Agrin C-terminal 22 kDa fragment (C22)]
O00468	AGRN	932	1000	R.CVEESGSAHCVCPMLTCPEAN*ATK.V	4.451	-1.56	904.374	3	LTCPEANATKVCG	2	Agrin [Cleaved into: Agrin N-terminal 110 kDa subunit; Agrin C-terminal 110 kDa subunit; Agrin C-terminal 90 kDa fragment (C90); Agrin C-terminal 22 kDa fragment (C22)]
F5GXJ9	ALCAM	40	12.431	R.LN*LSENYTLSISNAR.I	2.862	-0.39	566.624	3	EYKDRLNLSENYT	2	CD166 antigen
F5GXJ9	ALCAM	44	20.625	K.SVQYDDVPEYKDRLNLSEN*YTLSISNAR.I	3.488	0.29	823.902	4	RLNLSENYTLSIS	4	CD166 antigen
F5GXJ9	ALCAM	116	1000	K.KLGDCISEDSYPDGN*ITWYR.N	2.409	-1.84	798.025	3	DSYPDGNITWYRN	6	CD166 antigen
F5GXJ9	ALCAM	214	1000	K.N*AIKEGDN*ITLK.C	1.88	1.33	661.354	2	AIKEGDNITLKCL	5	CD166 antigen
F5GXJ9	ALCAM	310	58.551	R.N*ATVVWMKDNIR.L	2.137	-0.1	725.374	2	TISASRNATVVWM	2	CD166 antigen
F5GXJ9	ALCAM	429	4.344	K.IIISPEEN*VTLTCTAENQLER.T	3.05	1.8	811.742	3	IISPEENVTLTCT	22	CD166 antigen
F5GXJ9	ALCAM	448	13.38	R.TVNSLN*VSAISIPEHDEADEISDENREK.V	3.453	0.58	1038.83	3	RTVNSLNVSAISI	5	CD166 antigen
B1ANL0	ALPL	76	12.977	K.VVGGEREN*VSMVDYAHNNYQAQSAVPLRHETHGGEDVAVFSK.G	5.031	-0.29	920.841	5	VGGERENVSMVDY	2	Alkaline phosphatase, tissue-nonspecific isozyme
P05186	ALPL	140	22.492	R.SRCN*TTQGNEVTSILR.W	3.076	0.53	613.636	3	TERSRCNTTQGNE	1	Alkaline phosphatase, tissue-nonspecific isozyme (AP-TNAP) (TNSALP) (EC 3.1.3.1) (Alkaline phosphatase liver/bone/kidney isozyme)
P05186	ALPL	230	1000	K.N*KTDVEYESDEKAR.G	3.635	-0.23	562.928	3	KYMYPKNKTDVEY	1	Alkaline phosphatase, tissue-nonspecific isozyme (AP-TNAP) (TNSALP) (EC 3.1.3.1) (Alkaline phosphatase liver/bone/kidney isozyme)
P05186	ALPL	271	1000	K.HSHFIWN*R.T	2.095	0.17	367.182	3	HSHFIWNRTELLT	1	Alkaline phosphatase, tissue-nonspecific isozyme (AP-TNAP) (TNSALP) (EC 3.1.3.1) (Alkaline phosphatase liver/bone/kidney isozyme)
Q4KMQ2	ANO6	493	19.843	K.NIN*GTDPIQK.Y	2.048	0.44	551.785	2	KLPKNINGTDPIQ	1	Anoctamin-6 (Small-conductance calcium-activated nonselective cation channel) (SCAN channel) (Transmembrane protein 16F)
Q4KMQ2	ANO6	802	42.565	K.GNPYSDLGN*HTTCR.Y	3.21	-1.27	797.843	2	PYSDLGNHTTCRY	3	Anoctamin-6 (Small-conductance calcium-activated nonselective cation channel) (SCAN channel) (Transmembrane protein 16F)
H0YC24	ANTXR1	94	2.576	K.IN*DSVTLNEKPFSVEDTYLLCPAPILK.E	3.047	0.23	1027.2	3	LCSFKINDSVTLN	2	Anthrax toxin receptor 1 (Fragment)
F5GZY0	APLP2	448	1000	R.RN*QSLSLLYK.V	2.149	-0.45	408.899	3	VIEERRNQSLSLL	2	Amyloid-like protein 2
H0Y512	APMAP	145	1000	R.AGPN*GTLFVADAYK.G	2.871	-0.26	713.858	2	GIRAGPNGTLFVA	1	Adipocyte plasma membrane-associated protein (Fragment)
E7EMM4	ASAH1	234	1000	R.TVLEN*STSYEEAK.N	2.223	0.49	737.346	2	TRTVLENSTSYEE	1	Acid ceramidase
E7EMM4	ASAH1	261	1000	K.ILAPAYFILGGN*QSGEGCVITR.D	3.782	-0.17	780.403	3	YFILGGNQSGEGC	4	Acid ceramidase
C9IYZ9	ATG9A	99	1000	K.M^VN*HSLHPTEPVK.V	2.732	0.05	377.692	4	FANKMVNHSLHPT	3	Autophagy-related protein 9A (Fragment)
A6NGH2	ATP1B1	150	15.381	R.FKLEWLGN*CSGLNDETYGYK.E	2.667	-0.45	799.703	3	KLEWLGNCSGLND	14	Sodium/potassium-transporting ATPase subunit beta-1 (cDNA FLJ51474, highly similar to Sodium/potassium-transporting ATPase subunit beta-1)
A6NGH2	ATP1B1	185	1000	R.VLGFKPKPPKN*ESLETYPVM^K.Y	2.696	-0.38	606.08	4	KPKPPKNESLETY	8	Sodium/potassium-transporting ATPase subunit beta-1 (cDNA FLJ51474, highly similar to Sodium/potassium-transporting ATPase subunit beta-1)
I3L1V9	ATP1B2	36	1000	K.FLEPYN*DSIQAQK.N	3.333	-0.16	778.38	2	KFLEPYNDSIQAQ	2	Sodium/potassium-transporting ATPase subunit beta-2 (Fragment)
I3L1V9	ATP1B2	77	1000	R.TQLGN*CSGIGDSTHYGYSTGQPCVFIK.M	4.173	-0.49	984.112	3	NRTQLGNCSGIGD	3	Sodium/potassium-transporting ATPase subunit beta-2 (Fragment)
B7Z1N7	ATP1B3	110	1000	K.N*LTVCPDGALFEQK.G	2.298	-0.01	797.887	2	TLEEQKNLTVCPD	19	Sodium/potassium-transporting ATPase subunit beta-3 (cDNA FLJ50753, highly similar to Sodium/potassium-transporting ATPase subunit beta-3)
P54709	ATP1B3	240	6.591	K.KLHVGYLQPLVAVQVSFAPN*NTGK.E	3.01	0.39	646.61	4	QVSFAPNNTGKEV	3	Sodium/potassium-transporting ATPase subunit beta-3 (Sodium/potassium-dependent ATPase subunit beta-3) (ATPB-3) (CD antigen CD298)
A6NLC6	ATP6AP1	191	1000	K.QPVSPVIHPPVSYN*DTAPR.I	2.552	-0.19	693.025	3	HPPVSYNDTAPRI	4	V-type proton ATPase subunit S1 (Fragment)
Q15904	ATP6AP1	350	1000	R.LEVHSN*GSVAYFN*ASQVTGPSIYSFHCEYVSSLSK.K	3.567	-1.16	968.453	4	RLEVHSNGSVAYF	2	V-type proton ATPase subunit S1 (V-ATPase subunit S1) (Protein XAP-3) (V-ATPase Ac45 subunit) (V-ATPase S1 accessory protein) (Vacuolar proton pump subunit S1)
Q15904	ATP6AP1	357	1000	R.LEVHSN*GSVAYFN*ASQVTGPSIYSFHCEYVSSLSK.K	3.567	-1.16	968.453	4	GSVAYFNASQVTG	2	V-type proton ATPase subunit S1 (V-ATPase subunit S1) (Protein XAP-3) (V-ATPase Ac45 subunit) (V-ATPase S1 accessory protein) (Vacuolar proton pump subunit S1)
B7Z2A9	ATP6V0A1	445	44.193	K.SLNIFGSSWSVRPMFTYN*WTEETLR.G	3.008	-0.74	1008.82	3	RPMFTYNWTEETL	3	V-type proton ATPase 116 kDa subunit a isoform 1 (cDNA FLJ53780, highly similar to Vacuolar proton translocating ATPase 116 kDa subunit a isoform 1)
Q9Y487	ATP6V0A2	505	1000	K.MVLWN*DSVVR.H	2.04	-0.32	611.313	2	KKMVLWNDSVVRH	6	V-type proton ATPase 116 kDa subunit a isoform 2 (V-ATPase 116 kDa isoform a2) (Lysosomal H(+)-transporting ATPase V0 subunit a2) (TJ6) (Vacuolar proton translocating ATPase 116 kDa subunit a isoform 2)
Q6UW56	ATRAID	157	12.218	K.NLCN*NTGDPEMCPEN*GSCVPDGPGLLQCVCADGFHGYK.C	3.531	3.67	1415.92	3	GQKNLCNNTGDPE	1	All-trans retinoic acid-induced differentiation factor (Apoptosis-related protein 3) (APR-3) (p18)
Q6UW56	ATRAID	168	47.574	K.NLCN*NTGDPEMCPEN*GSCVPDGPGLLQCVCADGFHGYK.C	3.531	3.67	1415.92	3	PEMCPENGSCVPD	1	All-trans retinoic acid-induced differentiation factor (Apoptosis-related protein 3) (APR-3) (p18)
O75882	ATRN	264	29.422	K.ISN*SSDTVECECSENWKGEACDIPHCTDNCGFPHR.G	3.819	1.2	835.136	5	GECKISNSSDTVE	3	Attractin (DPPT-L) (Mahogany homolog)
O75882	ATRN	300	1000	R.GICN*SSDVR.G	2.475	-0.44	505.726	2	PHRGICNSSDVRG	1	Attractin (DPPT-L) (Mahogany homolog)
O75882	ATRN	731	1000	R.N*HSCSEGQISIFR.Y	1.989	0.17	513.237	3	DHCVPRNHSCSEG	3	Attractin (DPPT-L) (Mahogany homolog)
O75882	ATRN	914	43.066	K.AATCINPLN*GSVCERPAN*HSAK.Q	2.442	0.03	594.032	4	TCINPLNGSVCER	1	Attractin (DPPT-L) (Mahogany homolog)
O75882	ATRN	923	46.873	K.AATCINPLN*GSVCERPAN*HSAK.Q	2.442	0.03	594.032	4	VCERPANHSAKQC	1	Attractin (DPPT-L) (Mahogany homolog)
O75882	ATRN	1073	1000	K.CIN*QSICEK.C	2.668	-0.22	577.757	2	GHSKCINQSICEK	1	Attractin (DPPT-L) (Mahogany homolog)
O75882	ATRN	1082	1000	K.CIN*QSICEKCEN*LTTGK.H	2.886	0.14	687.641	3	ICEKCENLTTGKH	1	Attractin (DPPT-L) (Mahogany homolog)
O43505	B3GNT1	204	1.115	R.VAQPGINYALGTN*VSYPNNLLR.N	4.171	-0.1	793.085	3	NYALGTNVSYPNN	3	N-acetyllactosaminide beta-1,3-N-acetylglucosaminyltransferase (EC 2.4.1.149) (I-beta-1,3-N-acetylglucosaminyltransferase) (iGnT) (Poly-N-acetyllactosamine extension enzyme) (UDP-GlcNAc:betaGal beta-1,3-N-acetylglucosaminyltransferase 1)
O43505	B3GNT1	300	83.317	R.RM^PMNKNELVQLYQVGEVRPFYYGLCTPCQAPTN*YSR.W	4.755	1.07	1125.54	4	PCQAPTNYSRWVN	5	N-acetyllactosaminide beta-1,3-N-acetylglucosaminyltransferase (EC 2.4.1.149) (I-beta-1,3-N-acetylglucosaminyltransferase) (iGnT) (Poly-N-acetyllactosamine extension enzyme) (UDP-GlcNAc:betaGal beta-1,3-N-acetylglucosaminyltransferase 1)
O60512	B4GALT3	57	1000	R.DVYSN*LSHLPGAPGGPPAPQGLPYCPER.S	2.656	-0.42	983.807	3	PRDVYSNLSHLPG	4	Beta-1,4-galactosyltransferase 3 (Beta-1,4-GalTase 3) (Beta4Gal-T3) (b4Gal-T3) (EC 2.4.1.-) (UDP-Gal:beta-GlcNAc beta-1,4-galactosyltransferase 3) (UDP-galactose:beta-N-acetylglucosamine beta-1,4-galactosyltransferase 3) [Includes: N-acetyllactosamine synthase (EC 2.4.1.90) (Nal synthase); Beta-N-acetylglucosaminylglycopeptide beta-1,4-galactosyltransferase (EC 2.4.1.38); Beta-N-acetylglucosaminy…
O60512	B4GALT3	166	6.454	R.QQLAYGIYVIHQAGN*GTFNR.A	2.885	-0.35	751.714	3	VIHQAGNGTFNRA	2	Beta-1,4-galactosyltransferase 3 (Beta-1,4-GalTase 3) (Beta4Gal-T3) (b4Gal-T3) (EC 2.4.1.-) (UDP-Gal:beta-GlcNAc beta-1,4-galactosyltransferase 3) (UDP-galactose:beta-N-acetylglucosamine beta-1,4-galactosyltransferase 3) [Includes: N-acetyllactosamine synthase (EC 2.4.1.90) (Nal synthase); Beta-N-acetylglucosaminylglycopeptide beta-1,4-galactosyltransferase (EC 2.4.1.38); Beta-N-acetylglucosaminy…
O60512	B4GALT3	385	1000	R.RPPARPGPLSTAN*HTALR.G	2.406	-1.58	479.517	4	GPLSTANHTALRG	2	Beta-1,4-galactosyltransferase 3 (Beta-1,4-GalTase 3) (Beta4Gal-T3) (b4Gal-T3) (EC 2.4.1.-) (UDP-Gal:beta-GlcNAc beta-1,4-galactosyltransferase 3) (UDP-galactose:beta-N-acetylglucosamine beta-1,4-galactosyltransferase 3) [Includes: N-acetyllactosamine synthase (EC 2.4.1.90) (Nal synthase); Beta-N-acetylglucosaminylglycopeptide beta-1,4-galactosyltransferase (EC 2.4.1.38); Beta-N-acetylglucosaminy…
P50895	BCAM	377	1000	K.VLSLPLN*SSAVVN*CSVHGLPTPALR.W	4.357	1.48	1304.2	2	VLSLPLNSSAVVN	1	Basal cell adhesion molecule (Auberger B antigen) (B-CAM cell surface glycoprotein) (F8/G253 antigen) (Lutheran antigen) (Lutheran blood group glycoprotein) (CD antigen CD239)
P50895	BCAM	383	1000	K.VLSLPLN*SSAVVN*CSVHGLPTPALR.W	4.357	1.48	1304.2	2	NSSAVVNCSVHGL	1	Basal cell adhesion molecule (Auberger B antigen) (B-CAM cell surface glycoprotein) (F8/G253 antigen) (Lutheran antigen) (Lutheran blood group glycoprotein) (CD antigen CD239)
Q13161	BMPR2	55	1000	R.ISHEN*GTILCSK.G	2.729	-1.57	681.333	2	SRISHENGTILCS	2	Bone morphogenetic protein receptor type-2 (Bone morphogenetic protein receptor, type II (Serine/threonine kinase), isoform CRA_a) (Bone morphogenic protein type II receptor)
I3L192	BSG	36	1000	K.ILLTCSLN*DSATEVTGHR.W	1.98	0.77	663.999	3	LLTCSLNDSATEV	15	Basigin (Fragment)
I3L192	BSG	144	1000	K.ALMN*GSESR.F	1.69	0.29	484.224	2	EDKALMNGSESRF	12	Basigin (Fragment)
P35613	BSG	302	0	R.SELHIENLNMEADPGQYRCN*GTSSK.G	2.875	0.56	951.761	3	PGQYRCNGTSSKG	1	Basigin (5F7) (Collagenase stimulatory factor) (Extracellular matrix metalloproteinase inducer) (EMMPRIN) (Leukocyte activation antigen M6) (OK blood group antigen) (Tumor cell-derived collagenase stimulatory factor) (TCSF) (CD antigen CD147)
C9JNC3	BTN2A1	53	1000	R.GSVALVIHN*ITAQEN*GTYR.C	3.795	0.19	683.684	3	VALVIHNITAQEN	6	Butyrophilin subfamily 2 member A1 (Fragment)
C9JNC3	BTN2A1	59	1000	R.GSVALVIHN*ITAQEN*GTYR.C	3.795	0.19	683.684	3	NITAQENGTYRCY	6	Butyrophilin subfamily 2 member A1 (Fragment)
C9J3Q8	BTN3A3	115	1000	R.IHN*VTASDSGK.Y	2.176	-0.11	377.856	3	AALRIHNVTASDS	1	Butyrophilin subfamily 3 member A3 (Fragment)
Q9H7M9	C10orf54	91	1000	R.RPIRN*LTFQDLHLHHGGHQAAN*TSHDLAQR.H	3.444	-1.37	575.294	6	ERRPIRNLTFQDL	2	Platelet receptor Gi24
Q9H7M9	C10orf54	108	1000	R.RPIRN*LTFQDLHLHHGGHQAAN*TSHDLAQR.H	3.444	-1.37	575.294	6	GGHQAANTSHDLA	2	Platelet receptor Gi24
Q9H7M9	C10orf54	128	1000	R.HGLESASDHHGN*FSITMR.N	2.369	0.13	500.48	4	ASDHHGNFSITMR	1	Platelet receptor Gi24
J3QRL0	C1orf159	92	1000	R.SFAGPGAPFPM^N*R.S	2.306	0.19	684.319	2	GAPFPMNRSSGTP	1	Uncharacterized protein C1orf159 (Fragment)
F2Z333	C1orf233	109	1000	R.AFALN*CSWR.G	2.354	-0.59	564.263	2	VRAFALNCSWRGA	2	Fibronectin type-III domain-containing transmembrane protein C1orf233
Q8WWB7	C1orf85	187	1000	R.TFAN*GSLAFR.V	2.331	0.14	543.777	2	PTRTFANGSLAFR	2	Lysosomal protein NCU-G1
O43570	CA12	80	4.085	K.KYPSCGGLLQSPIDLHSDILQYDASLTPLEFQGYN*LSANK.Q	4.082	-0.71	1114.8	4	LEFQGYNLSANKQ	4	Carbonic anhydrase 12 (EC 4.2.1.1) (Carbonate dehydratase XII) (Carbonic anhydrase XII) (CA-XII) (Tumor antigen HOM-RCC-3.1.3)
B7Z658	CACNA2D1	88	1000	R.HLVN*ISVYAFN*K.S	2.458	0.12	470.918	3	LMRHLVNISVYAF	3	Voltage-dependent calcium channel subunit alpha-2-1 (cDNA FLJ50197, highly similar to Dihydropyridine-sensitive L-type calcium channel subunits alpha- 2/delta)
B7Z658	CACNA2D1	95	1000	R.HLVN*ISVYAFN*K.S	2.458	0.12	470.918	3	ISVYAFNKSYDYQ	3	Voltage-dependent calcium channel subunit alpha-2-1 (cDNA FLJ50197, highly similar to Dihydropyridine-sensitive L-type calcium channel subunits alpha- 2/delta)
E7ERK3	CACNA2D1	136	21	K.VQAAHQWREDFASNEVVYYNAKDDLDPEKN*DSEPGSQR.I	3.525	-1.04	883.005	5	DLDPEKNDSEPGS	8	Voltage-dependent calcium channel subunit alpha-2-1
B7Z658	CACNA2D1	198	1000	K.SFSGVLDCGN*CSR.I	2.966	-0.21	731.303	2	GVLDCGNCSRIFH	1	Voltage-dependent calcium channel subunit alpha-2-1 (cDNA FLJ50197, highly similar to Dihydropyridine-sensitive L-type calcium channel subunits alpha- 2/delta)
P54289	CACNA2D1	781	94.95	R.SLDNDNYVFTAPYFN*K.S	3.343	-0.44	955.938	2	FTAPYFNKSGPGA	2	Voltage-dependent calcium channel subunit alpha-2/delta-1 (Voltage-gated calcium channel subunit alpha-2/delta-1) [Cleaved into: Voltage-dependent calcium channel subunit alpha-2-1; Voltage-dependent calcium channel subunit delta-1]
C9JE82	CACNA2D2	202	0	K.NKVN*YSYAAVQIPTDIYK.G	2.729	-0.41	697.361	3	NFKNKVNYSYAAV	2	Voltage-dependent calcium channel subunit alpha-2/delta-2
C9JE82	CACNA2D2	689	49.59	R.EYCKDLN*ASDNNTEFLK.N	4.281	-0.43	688.642	3	EYCKDLNASDNNT	1	Voltage-dependent calcium channel subunit alpha-2/delta-2
F5H0H5	CADM1	18	1000	K.DTAVEGEEIEVN*CTAMASKPATTIR.W	2.773	1	899.427	3	GEEIEVNCTAMAS	3	Cell adhesion molecule 1 (Fragment)
F5H125	CADM1	34	66.299	K.DVTVIEGEVATISCQVN*KSDDSVIQLLNPNR.Q	3.792	1.89	1139.58	3	TISCQVNKSDDSV	1	Cell adhesion molecule 1 (Fragment)
F5H125	CADM1	68	1000	R.FQLLN*FSSSELK.V	2.71	0.14	708.369	2	SRFQLLNFSSSEL	3	Cell adhesion molecule 1 (Fragment)
F5H125	CADM1	80	1000	K.VSLTN*VSISDEGR.Y	2.66	-0.06	690.349	2	LKVSLTNVSISDE	2	Cell adhesion molecule 1 (Fragment)
F5H125	CADM1	132	42.426	R.NLMIDIQKDTAVEGEEIEVN*CTAMASKPATTIR.W	4.878	2.5	1217.93	3	GEEIEVNCTAMAS	6	Cell adhesion molecule 1 (Fragment)
Q9BY67	CADM1	304	6.591	R.VDDEMPQHAVLSGPNLFINNLN*K.T	4.63	0.57	856.76	3	LFINNLNKTDNGT	2	Cell adhesion molecule 1 (Immunoglobulin superfamily member 4) (IgSF4) (Nectin-like protein 2) (NECL-2) (Spermatogenic immunoglobulin superfamily) (SgIgSF) (Synaptic cell adhesion molecule) (SynCAM) (Tumor suppressor in lung cancer 1) (TSLC-1)
Q9BY67	CADM1	308	22.492	R.VDDEM^PQHAVLSGPNLFINNLN*KTDN*GTYR.C	4.63	3.16	1132.21	3	NLNKTDNGTYRCE	1	Cell adhesion molecule 1 (Immunoglobulin superfamily member 4) (IgSF4) (Nectin-like protein 2) (NECL-2) (Spermatogenic immunoglobulin superfamily) (SgIgSF) (Synaptic cell adhesion molecule) (SynCAM) (Tumor suppressor in lung cancer 1) (TSLC-1)
Q8NFZ8	CADM4	67	1000	R.QTLFFN*GTR.A	1.655	0.07	543.777	2	RQTLFFNGTRALK	2	Cell adhesion molecule 4 (Immunoglobulin superfamily member 4C) (IgSF4C) (Nectin-like protein 4) (NECL-4) (TSLC1-like protein 2)
Q8NFZ8	CADM4	262	13.38	R.WNRGN*ESLPER.A	2.324	-2.61	680.826	2	IRWNRGNESLPER	1	Cell adhesion molecule 4 (Immunoglobulin superfamily member 4C) (IgSF4C) (Nectin-like protein 4) (NECL-4) (TSLC1-like protein 2)
O43852	CALU	131	69.805	K.GHDLN*EDGLVSWEEYKN*ATYGYVLDDPDPDDGFNYK.Q	4.496	8.96	1039.96	4	SWEEYKNATYGYV	1	Calumenin (Crocalbin) (IEF SSP 9302)
K7EN15	CANT1	88	7.971	R.LGQAPANWYN*DTYPLSPPQR.T	2.834	-0.44	764.37	3	APANWYNDTYPLS	6	Soluble calcium-activated nucleotidase 1
H0YMR0	CASC4	31	9.34	R.QEDQLQDYRKN*NTYLVK.R	3.255	0.71	1079.54	2	LQDYRKNNTYLVK	2	Protein CASC4 (Fragment)
Q6P4E1	CASC4	115	1000	K.LQN*N*ISYQMADIHHLK.E	2.432	-0.52	483.492	4	KVKLQNNISYQMA	3	Protein CASC4 (Cancer susceptibility candidate gene 4 protein)
C9JDR3	CASD1	106	1000	K.IHN*GSSEALSQYK.M	3.02	-0.95	718.848	2	WSIKIHNGSSEAL	1	CAS1 domain-containing protein 1 (Fragment)
Q96PB1	CASD1	241	19.607	K.M^ITNEKIDAYNEAAVSILN*SSTR.N	3.012	0.86	853.755	3	AAVSILNSSTRNS	2	CAS1 domain-containing protein 1
Q6YHK3	CD109	118	1000	R.TQDEILFSN*STR.L	3.131	-0.54	707.34	2	DEILFSNSTRLSF	1	CD109 antigen (150 kDa TGF-beta-1-binding protein) (C3 and PZP-like alpha-2-macroglobulin domain-containing protein 7) (Platelet-specific Gov antigen) (p180) (r150) (CD antigen CD109)
Q6YHK3	CD109	397	25.137	R.NNVVITVTQRN*YTEYWSGSNSGNQK.M	4.691	0.3	954.79	3	ITVTQRNYTEYWS	3	CD109 antigen (150 kDa TGF-beta-1-binding protein) (C3 and PZP-like alpha-2-macroglobulin domain-containing protein 7) (Platelet-specific Gov antigen) (p180) (r150) (CD antigen CD109)
Q6YHK3	CD109	419	1000	K.MEAVQKIN*YTVPQSGTFK.I	2.817	0.76	682.016	3	EAVQKINYTVPQS	4	CD109 antigen (150 kDa TGF-beta-1-binding protein) (C3 and PZP-like alpha-2-macroglobulin domain-containing protein 7) (Platelet-specific Gov antigen) (p180) (r150) (CD antigen CD109)
Q6YHK3	CD109	513	21.039	R.GQLVAVGKQN*STM^FSLTPENSWTPK.A	2.571	1.17	913.791	3	VAVGKQNSTMFSL	4	CD109 antigen (150 kDa TGF-beta-1-binding protein) (C3 and PZP-like alpha-2-macroglobulin domain-containing protein 7) (Platelet-specific Gov antigen) (p180) (r150) (CD antigen CD109)
E9PLZ6	CD151	159	4.54	R.YHQPGHEAVTSAVDQLQQEFHCCGSN*NSQDWRDSEWIR.S	3.289	0.29	915.801	5	FHCCGSNNSQDWR	2	CD151 antigen (Fragment)
H0YL10	CD276	80	7.455	R.GYPEAEVFWQDGQGVPLTGN*VTTSQM^ANEQGLFDVHSVLR.V	3.862	0.35	1099.77	4	GVPLTGNVTTSQM	3	CD276 antigen (Fragment)
H0YK40	CD276	91	1000	K.QLVHSFAEGQDQGSAYAN*R.T	2.07	1.24	694.325	3	QGSAYANRTALFP	20	CD276 antigen (Fragment)
H0YK40	CD276	104	1000	R.TALFPDLLAQGN*ASLR.L	3.234	3.04	563.975	3	DLLAQGNASLRLQ	11	CD276 antigen (Fragment)
H0YL10	CD276	106	1000	R.VVLGAN*GTYSCLVR.N	1.591	0.13	504.597	3	RVVLGANGTYSCL	25	CD276 antigen (Fragment)
Q5ZPR3	CD276	189	1000	K.DLRPGDTVTITCSSYQGYPEAEVFWQDGQGVPLTGN*VTTSQM^AN*EQGLFDVHSILR.V	4.065	2.24	1242.19	5	GVPLTGNVTTSQM	1	CD276 antigen (4Ig-B7-H3) (B7 homolog 3) (B7-H3) (Costimulatory molecule) (CD antigen CD276)
Q5ZPR3	CD276	309	1000	K.QLVHSFTEGRDQGSAYAN*R.T	2.607	1.3	1070.01	2	QGSAYANRTALFP	1	CD276 antigen (4Ig-B7-H3) (B7 homolog 3) (B7-H3) (Costimulatory molecule) (CD antigen CD276)
P25942	CD40	153	1000	K.QIATGVSDTICEPCPVGFFSN*VSSAFEK.C	4.076	1.13	1017.47	3	PVGFFSNVSSAFE	4	Tumor necrosis factor receptor superfamily member 5 (B-cell surface antigen CD40) (Bp50) (CD40L receptor) (CDw40) (CD antigen CD40)
P25942	CD40	180	1000	K.DLVVQQAGTN*KTDVVCGPQDR.L	4.639	0.03	768.378	3	VQQAGTNKTDVVC	3	Tumor necrosis factor receptor superfamily member 5 (B-cell surface antigen CD40) (Bp50) (CD40L receptor) (CDw40) (CD antigen CD40)
E7EPC6	CD44	57	1000	K.AFN*STLPTMAQMEK.A	2.55	1.7	786.371	2	DLCKAFNSTLPTM	1	CD44 antigen
P15529	CD46	83	1000	K.GYFYIPPLATHTICDRN*HTWLPVSDDACYR.E	2.861	-0.04	729.142	5	HTICDRNHTWLPV	7	Membrane cofactor protein (TLX) (Trophoblast leukocyte common antigen) (CD antigen CD46)
Q08722	CD47	73	1000	K.GRDIYTFDGALN*K.S	2.857	-0.52	491.58	3	TFDGALNKSTVPT	3	Leukocyte surface antigen CD47 (Antigenic surface determinant protein OA3) (Integrin-associated protein) (IAP) (Protein MER6) (CD antigen CD47)
Q08722	CD47	111	1000	K.SDAVSHTGN*YTCEVTELTR.E	2.658	-0.05	714.988	3	AVSHTGNYTCEVT	15	Leukocyte surface antigen CD47 (Antigenic surface determinant protein OA3) (Integrin-associated protein) (IAP) (Protein MER6) (CD antigen CD47)
B1AP13	CD55	95	1000	K.GSQWSDIEEFCN*R.S	3.232	0.1	815.838	2	DIEEFCNRSCEVP	1	Complement decay-accelerating factor
B1AMW1	CD58	195	2.806	K.IQCTLSNPLFN*TTSSIILTTCIPSSGHSR.H	3.707	-0.48	1070.2	3	LSNPLFNTTSSII	2	CD58 antigen, (Lymphocyte function-associated antigen 3), isoform CRA_c (Lymphocyte function-associated antigen 3)
E9PI80	CD59	43	1000	K.TAVN*CSSDFDACLITK.A	4.128	0.54	602.271	3	DCKTAVNCSSDFD	5	CD59 glycoprotein
P08962	CD63	130	39.663	R.QQMENYPKN*N*HTASILDR.M	3.347	1.71	722.342	3	ENYPKNNHTASIL	2	CD63 antigen
P08962	CD63	150	1000	K.CCGAAN*YTDWEKIPSMSK.N	3.021	-0.15	707.637	3	KCCGAANYTDWEK	9	CD63 antigen
P08962	CD63	172	11.22	K.NRVPDSCCIN*VTVGCGIN*FNEK.A	3.992	1.8	853.72	3	PDSCCINVTVGCG	2	CD63 antigen
P34810	CD68	199	4.085	R.VMYTTQGGGEAWGISVLNPN*KTK.V	2.465	-0.04	818.745	3	ISVLNPNKTKVQG	2	Macrosialin (Gp110) (CD antigen CD68)
A6NNI4	CD9	82	1000	K.AIHYALN*CCGLAGGVEQFISDICPK.K	3.389	-0.62	932.772	3	AIHYALNCCGLAG	2	CD9 antigen
K7EKV5	CD97	33	1000	R.WCPQN*SSCVN*ATACR.C	2.586	0.37	908.863	2	ARWCPQNSSCVNA	2	CD97 antigen subunit alpha (Fragment)
K7EKV5	CD97	38	1000	R.WCPQN*SSCVN*ATACR.C	2.586	0.37	908.863	2	QNSSCVNATACRC	2	CD97 antigen subunit alpha (Fragment)
P48960	CD97	371	1000	R.GDKN*VTMGQSSAR.M	3.121	0.15	451.882	3	QERGDKNVTMGQS	2	CD97 antigen (Leukocyte antigen CD97) (CD antigen CD97) [Cleaved into: CD97 antigen subunit alpha; CD97 antigen subunit beta]
P48960	CD97	453	9.34	R.LSAVNSIFLSHN*NTK.E	2.683	0.14	824.433	2	SIFLSHNNTKELN	2	CD97 antigen (Leukocyte antigen CD97) (CD antigen CD97) [Cleaved into: CD97 antigen subunit alpha; CD97 antigen subunit beta]
B7Z2U6	CDH12	505	0	R.DFRN*NTAGIETR.R	2.999	-0.93	466.228	3	TVRDFRNNTAGIE	1	Cadherin-12 (cDNA FLJ59304, highly similar to Cadherin-12)
A8MWK3	CDH2	159	1000	R.SDRDKN*LSLR.Y	2.1	-0.31	402.882	3	RSDRDKNLSLRYS	1	Cadherin-2 (cDNA FLJ53252, highly similar to Cadherin-2)
A8MWK3	CDH2	294	0	R.IVSQAPSTPSPNMFTINN*ETGDIITVAAGLDR.E	3.401	1.26	1111.56	3	NMFTINNETGDII	6	Cadherin-2 (cDNA FLJ53252, highly similar to Cadherin-2)
A8MWK3	CDH2	371	136.53	R.VDIIVAN*LTVTDKDQPHTPAWNAVYR.I	4.086	-0.23	980.51	3	VDIIVANLTVTDK	1	Cadherin-2 (cDNA FLJ53252, highly similar to Cadherin-2)
A8MWK3	CDH2	661	12.058	K.FLEAGIYEVPIIITDSGNPPKSN*ISILR.V	2.768	0.16	612.737	5	GNPPKSNISILRV	9	Cadherin-2 (cDNA FLJ53252, highly similar to Cadherin-2)
Q9NYQ6	CELSR1	1576	1000	K.DIGN*YSCAAQGTQTGSKK.S	2.721	0.73	944.934	2	FGKDIGNYSCAAQ	4	Cadherin EGF LAG seven-pass G-type receptor 1 (Cadherin family member 9) (Flamingo homolog 2) (hFmi2)
Q9NYQ6	CELSR1	1640	24.437	K.NVDMAGFIANN*GTR.E	3.042	-0.12	741.848	2	AGFIANNGTREGC	2	Cadherin EGF LAG seven-pass G-type receptor 1 (Cadherin family member 9) (Flamingo homolog 2) (hFmi2)
Q9NYQ6	CELSR1	1979	1000	K.GFDPDCN*KTN*GQCQCK.E	2.235	-0.18	645.586	3	GFDPDCNKTNGQC	3	Cadherin EGF LAG seven-pass G-type receptor 1 (Cadherin family member 9) (Flamingo homolog 2) (hFmi2)
Q9NYQ6	CELSR1	1982	1000	K.GFDPDCN*KTN*GQCQCK.E	2.235	-0.18	645.586	3	PDCNKTNGQCQCK	3	Cadherin EGF LAG seven-pass G-type receptor 1 (Cadherin family member 9) (Flamingo homolog 2) (hFmi2)
Q9NYQ6	CELSR1	2122	1000	K.LSRN*ETQVDGAR.A	2.97	0.31	674.839	2	NEKLSRNETQVDG	1	Cadherin EGF LAG seven-pass G-type receptor 1 (Cadherin family member 9) (Flamingo homolog 2) (hFmi2)
Q9HCU4	CELSR2	1036	18.603	R.LLDRNDNPPVLGNFEILFNNYVTN*R.S	6.189	2.12	984.172	3	FNNYVTNRSSSFP	2	Cadherin EGF LAG seven-pass G-type receptor 2 (Cadherin family member 10) (Epidermal growth factor-like protein 2) (EGF-like protein 2) (Flamingo homolog 3) (Multiple epidermal growth factor-like domains protein 3) (Multiple EGF-like domains protein 3)
Q9HCU4	CELSR2	1076	61.679	R.GNELSLVLLN*ASTGELK.L	4.693	-0.02	587.656	3	LSLVLLNASTGEL	1	Cadherin EGF LAG seven-pass G-type receptor 2 (Cadherin family member 10) (Epidermal growth factor-like protein 2) (EGF-like protein 2) (Flamingo homolog 3) (Multiple epidermal growth factor-like domains protein 3) (Multiple EGF-like domains protein 3)
Q9HCU4	CELSR2	1501	1000	R.FGSVLGN*YSCAAQGTQGGSKK.S	2.142	-0.11	707.337	3	FGSVLGNYSCAAQ	3	Cadherin EGF LAG seven-pass G-type receptor 2 (Cadherin family member 10) (Epidermal growth factor-like protein 2) (EGF-like protein 2) (Flamingo homolog 3) (Multiple epidermal growth factor-like domains protein 3) (Multiple EGF-like domains protein 3)
Q9HCU4	CELSR2	1565	9.34	R.HIDMADFIANN*GTVPGCPAK.K	5.691	1.33	1066	2	ADFIANNGTVPGC	3	Cadherin EGF LAG seven-pass G-type receptor 2 (Cadherin family member 10) (Epidermal growth factor-like protein 2) (EGF-like protein 2) (Flamingo homolog 3) (Multiple epidermal growth factor-like domains protein 3) (Multiple EGF-like domains protein 3)
Q9HCU4	CELSR2	1741	1000	R.LHGLHLSN*ITVGGIPGPAGGVAR.G	2.415	-0.08	732.743	3	HGLHLSNITVGGI	2	Cadherin EGF LAG seven-pass G-type receptor 2 (Cadherin family member 10) (Epidermal growth factor-like protein 2) (EGF-like protein 2) (Flamingo homolog 3) (Multiple epidermal growth factor-like domains protein 3) (Multiple EGF-like domains protein 3)
Q9HCU4	CELSR2	1900	1000	K.GFDPDCN*KTSGECHCK.E	1.771	0.04	479.438	4	GFDPDCNKTSGEC	3	Cadherin EGF LAG seven-pass G-type receptor 2 (Cadherin family member 10) (Epidermal growth factor-like protein 2) (EGF-like protein 2) (Flamingo homolog 3) (Multiple epidermal growth factor-like domains protein 3) (Multiple EGF-like domains protein 3)
Q9HCU4	CELSR2	2024	24.243	R.GWLPPNLFN*CTSITFSELK.G	3.021	-0.65	1114.05	2	LPPNLFNCTSITF	4	Cadherin EGF LAG seven-pass G-type receptor 2 (Cadherin family member 10) (Epidermal growth factor-like protein 2) (EGF-like protein 2) (Flamingo homolog 3) (Multiple epidermal growth factor-like domains protein 3) (Multiple EGF-like domains protein 3)
Q9HCU4	CELSR2	2043	1000	R.LQRN*ESGLDSGR.S	2.792	0.9	667.831	2	AERLQRNESGLDS	1	Cadherin EGF LAG seven-pass G-type receptor 2 (Cadherin family member 10) (Epidermal growth factor-like protein 2) (EGF-like protein 2) (Flamingo homolog 3) (Multiple epidermal growth factor-like domains protein 3) (Multiple EGF-like domains protein 3)
Q9HCU4	CELSR2	2061	1000	R.N*ATQHTAGYFGSDVK.V	3.266	-0.89	533.582	3	LALLLRNATQHTA	1	Cadherin EGF LAG seven-pass G-type receptor 2 (Cadherin family member 10) (Epidermal growth factor-like protein 2) (EGF-like protein 2) (Flamingo homolog 3) (Multiple epidermal growth factor-like domains protein 3) (Multiple EGF-like domains protein 3)
Q6ZMG9	CERS6	18	1000	R.FWLPHN*VTWADLK.N	2.978	0.38	543.949	3	RFWLPHNVTWADL	3	Ceramide synthase 6 (CerS6) (LAG1 longevity assurance homolog 6)
B8ZZ48	CHST10	99	1000	R.DDALKN*LSHTPVSK.F	2.594	-0.24	509.935	3	RDDALKNLSHTPV	1	Carbohydrate sulfotransferase 10 (Fragment)
C9J991	CHST12	134	1000	R.GFCAN*SSLAFPTK.E	3.262	-0.09	701.831	2	LRGFCANSSLAFP	1	Carbohydrate sulfotransferase 12 (Fragment)
C9J991	CHST12	209	12.155	R.EHVHN*ASAHLTFNK.F	2.31	-0.09	402.701	4	PREHVHNASAHLT	3	Carbohydrate sulfotransferase 12 (Fragment)
Q9NRB3	CHST12	280	1000	R.LYAN*HTSLPASAR.E	2.428	-1.28	702.361	2	MLRLYANHTSLPA	2	Carbohydrate sulfotransferase 12 (EC 2.8.2.5) (Chondroitin 4-O-sulfotransferase 2) (Chondroitin 4-sulfotransferase 2) (C4ST-2) (C4ST2) (Sulfotransferase Hlo)
Q7LGC8	CHST3	420	40.614	K.NTQAAHDGSGIYSTQKN*SSEQFEK.W	3.51	-0.61	658.301	4	IYSTQKNSSEQFE	4	Carbohydrate sulfotransferase 3 (EC 2.8.2.17) (Chondroitin 6-O-sulfotransferase 1) (C6ST-1) (Chondroitin 6-sulfotransferase) (Galactose/N-acetylglucosamine/N-acetylglucosamine 6-O-sulfotransferase 0) (GST-0)
Q86X52	CHSY1	189	1000	R.SLN*SSEPLFLGQTGLGTTEEMGK.L	3.971	1.67	1200.08	2	NFLRSLNSSEPLF	2	Chondroitin sulfate synthase 1 (EC 2.4.1.175) (EC 2.4.1.226) (Chondroitin glucuronyltransferase 1) (Chondroitin synthase 1) (ChSy-1) (Glucuronosyl-N-acetylgalactosaminyl-proteoglycan 4-beta-N-acetylgalactosaminyltransferase 1) (N-acetylgalactosaminyl-proteoglycan 3-beta-glucuronosyltransferase 1) (N-acetylgalactosaminyltransferase 1)
Q70JA7	CHSY3	155	1000	R.DGRPGSSHN*GSGDGGAAAPSARPR.D	3.315	0.06	560.013	4	RPGSSHNGSGDGG	1	Chondroitin sulfate synthase 3 (EC 2.4.1.175) (EC 2.4.1.226) (Carbohydrate synthase 2) (Chondroitin glucuronyltransferase 3) (Chondroitin synthase 2) (ChSy-2) (Glucuronosyl-N-acetylgalactosaminyl-proteoglycan 4-beta-N-acetylgalactosaminyltransferase II) (N-acetylgalactosaminyl-proteoglycan 3-beta-glucuronosyltransferase 3) (N-acetylgalactosaminyltransferase 3)
Q70JA7	CHSY3	279	43.297	R.SLN*SSKPLYLGQTGLGNIEELGK.L	3.156	-0.72	807.763	3	EFLRSLNSSKPLY	1	Chondroitin sulfate synthase 3 (EC 2.4.1.175) (EC 2.4.1.226) (Carbohydrate synthase 2) (Chondroitin glucuronyltransferase 3) (Chondroitin synthase 2) (ChSy-2) (Glucuronosyl-N-acetylgalactosaminyl-proteoglycan 4-beta-N-acetylgalactosaminyltransferase II) (N-acetylgalactosaminyl-proteoglycan 3-beta-glucuronosyltransferase 3) (N-acetylgalactosaminyltransferase 3)
B9EGJ9	CLCN3	462	4.085	K.ELFTDCGPLESSSLCDYRNDMN*ASK.I	2.053	0.91	971.415	3	DYRNDMNASKIVD	2	CLCN3 protein (H(+)/Cl(-) exchange transporter 3)
D6R9S8	CLDND1	42	38.189	R.SPVQEN*SSDLNK.S	2.794	-0.08	660.812	2	RSPVQENSSDLNK	1	Claudin domain-containing protein 1 (Fragment)
Q9H6B4	CLMP	74	0	R.HVYNN*LTEEQKGR.V	2.458	0.54	530.93	3	SRHVYNNLTEEQK	4	CXADR-like membrane protein (Adipocyte adhesion molecule) (Coxsackie- and adenovirus receptor-like membrane protein) (CAR-like membrane protein)
O75503	CLN5	271	1000	R.IFLYSGEPTYLGN*ETSVFGPTGN*KTLGLAIKR.F	3.368	0.08	863.205	4	EPTYLGNETSVFG	4	Ceroid-lipofuscinosis neuronal protein 5 (Protein CLN5)
O75503	CLN5	281	1000	R.IFLYSGEPTYLGN*ETSVFGPTGN*KTLGLAIKR.F	3.368	0.08	863.205	4	VFGPTGNKTLGLA	4	Ceroid-lipofuscinosis neuronal protein 5 (Protein CLN5)
H0YAS8	CLU	45	44.973	K.MLN*TSSLLEQLNEQFNWVSR.L	4.197	0.78	1206.59	2	YQWKMLNTSSLLE	1	Clusterin beta chain (Fragment)
Q9H8M5	CNNM2	112	0	R.VYGQNINN*ETWSR.I	3.337	-0.73	792.37	2	YGQNINNETWSRI	1	Metal transporter CNNM2 (Ancient conserved domain-containing protein 2) (Cyclin-M2)
Q8NE01	CNNM3	73	1000	R.LFGPGFAN*SSWSWVAPEGAGCR.E	3.447	0.53	1178.54	2	FGPGFANSSWSWV	6	Metal transporter CNNM3 (Ancient conserved domain-containing protein 3) (Cyclin-M3)
Q6P4Q7	CNNM4	85	13.208	R.LYGYSLGN*ISSNLISFTEVDDAETLHK.S	3.578	-1.99	997.155	3	YGYSLGNISSNLI	2	Metal transporter CNNM4 (Ancient conserved domain-containing protein 4) (Cyclin-M4)
Q6P4Q7	CNNM4	122	1000	K.DLVVQQLVN*VSRGN*TSGVLVVLTK.F	2.649	-0.68	848.817	3	VVQQLVNVSRGNT	1	Metal transporter CNNM4 (Ancient conserved domain-containing protein 4) (Cyclin-M4)
Q6P4Q7	CNNM4	127	1000	R.GN*TSGVLVVLTK.F	3.043	0.18	595.848	2	VNVSRGNTSGVLV	1	Metal transporter CNNM4 (Ancient conserved domain-containing protein 4) (Cyclin-M4)
P26992	CNTFR	60	1000	R.VN*GTDLAPDLLN*GSQLVLHGLELGHSGLYACFHR.D	3.321	0.09	736.772	5	AVTWRVNGTDLAP	3	Ciliary neurotrophic factor receptor subunit alpha (CNTF receptor subunit alpha) (CNTFR-alpha)
P26992	CNTFR	70	1000	R.VN*GTDLAPDLLN*GSQLVLHGLELGHSGLYACFHR.D	3.321	0.09	736.772	5	LAPDLLNGSQLVL	3	Ciliary neurotrophic factor receptor subunit alpha (CNTF receptor subunit alpha) (CNTFR-alpha)
P26992	CNTFR	142	2.017	K.GFYCSWHLPTPTYIPNTFN*VTVLHGSK.I	3.287	-0.07	785.636	4	YIPNTFNVTVLHG	1	Ciliary neurotrophic factor receptor subunit alpha (CNTF receptor subunit alpha) (CNTFR-alpha)
Q12860	CNTN1	208	10.752	R.FVSQTNGNLYIANVEASDKGN*YSCFVSSPSITK.S	3.785	5	1200.91	3	EASDKGNYSCFVS	1	Contactin-1 (Glycoprotein gp135) (Neural cell surface protein F3)
Q12860	CNTN1	457	1000	K.GTEWLVN*SSR.I	2.398	0.21	576.283	2	GTEWLVNSSRILI	1	Contactin-1 (Glycoprotein gp135) (Neural cell surface protein F3)
Q12860	CNTN1	494	1000	K.AN*STGTLVITDPTR.I	2.886	0.11	724.878	2	NNRGKANSTGTLV	7	Contactin-1 (Glycoprotein gp135) (Neural cell surface protein F3)
Q12860	CNTN1	933	1000	R.YIITWDHVVALSN*ESTVTGYK.V	4.931	0.41	800.406	3	HVVALSNESTVTG	1	Contactin-1 (Glycoprotein gp135) (Neural cell surface protein F3)
G3V5V4	COCH	84	46.129	R.VYSLPGREN*YSSVDANGIQSQMLSR.W	3.805	-0.68	925.448	3	SLPGRENYSSVDA	1	Cochlin (Fragment)
Q5KU26	COLEC12	67	1000	K.MDN*VTGGMETSR.Q	1.647	-1.21	650.773	2	VVEKMDNVTGGME	1	Collectin-12 (Collectin placenta protein 1) (CL-P1) (hCL-P1) (Nurse cell scavenger receptor 2) (Scavenger receptor class A member 4) (Scavenger receptor with C-type lectin)
Q5KU26	COLEC12	159	6.591	R.QSQLKETLEN*NSFLITTVN*K.T	2.304	-0.54	771.736	3	LKETLENNSFLIT	4	Collectin-12 (Collectin placenta protein 1) (CL-P1) (hCL-P1) (Nurse cell scavenger receptor 2) (Scavenger receptor class A member 4) (Scavenger receptor with C-type lectin)
Q5KU26	COLEC12	168	36.381	R.QSQLKETLEN*NSFLITTVN*K.T	2.304	-0.54	771.736	3	FLITTVNKTLQAY	4	Collectin-12 (Collectin placenta protein 1) (CL-P1) (hCL-P1) (Nurse cell scavenger receptor 2) (Scavenger receptor class A member 4) (Scavenger receptor with C-type lectin)
Q5KU26	COLEC12	271	9.34	K.VQSLQTLAAN*NSALAK.A	3.302	-0.05	816.446	2	LQTLAANNSALAK	1	Collectin-12 (Collectin placenta protein 1) (CL-P1) (hCL-P1) (Nurse cell scavenger receptor 2) (Scavenger receptor class A member 4) (Scavenger receptor with C-type lectin)
Q5KU26	COLEC12	323	1000	K.DLQDLHKDAEN*R.T	2.97	-1.77	728.848	2	LHKDAENRTAIKF	1	Collectin-12 (Collectin placenta protein 1) (CL-P1) (hCL-P1) (Nurse cell scavenger receptor 2) (Scavenger receptor class A member 4) (Scavenger receptor with C-type lectin)
Q5KU26	COLEC12	349	26.105	R.FQLFETDIVNIISN*ISYTAHHLR.T	2.751	-0.45	684.357	4	IVNIISNISYTAH	3	Collectin-12 (Collectin placenta protein 1) (CL-P1) (hCL-P1) (Nurse cell scavenger receptor 2) (Scavenger receptor class A member 4) (Scavenger receptor with C-type lectin)
Q5KU26	COLEC12	386	17.009	K.HTDDLTSLN*NTLANIR.L	2.243	-0.26	600.97	3	DDLTSLNNTLANI	1	Collectin-12 (Collectin placenta protein 1) (CL-P1) (hCL-P1) (Nurse cell scavenger receptor 2) (Scavenger receptor class A member 4) (Scavenger receptor with C-type lectin)
Q5KU26	COLEC12	437	1000	K.N*FTILQGPPGPR.G	2.283	-0.52	650.35	2	HGQLIKNFTILQG	1	Collectin-12 (Collectin placenta protein 1) (CL-P1) (hCL-P1) (Nurse cell scavenger receptor 2) (Scavenger receptor class A member 4) (Scavenger receptor with C-type lectin)
O75976	CPD	172	36.701	R.LLN*TTDVYLLPSLNPDGFER.A	3.763	-0.24	1140.59	2	RLVRLLNTTDVYL	2	Carboxypeptidase D (EC 3.4.17.22) (Metallocarboxypeptidase D) (gp180)
O75976	CPD	399	17.167	K.DSITGSGLEN*ATISVAGINHN*ITTGR.F	2.767	1.13	868.769	3	TGSGLENATISVA	7	Carboxypeptidase D (EC 3.4.17.22) (Metallocarboxypeptidase D) (gp180)
O75976	CPD	410	4.085	K.DSITGSGLEN*ATISVAGINHN*ITTGR.F	2.767	1.13	868.769	3	VAGINHNITTGRF	7	Carboxypeptidase D (EC 3.4.17.22) (Metallocarboxypeptidase D) (gp180)
O75976	CPD	522	44.278	R.FANEYPN*ITR.L	2.545	0.19	614.298	2	FANEYPNITRLYS	2	Carboxypeptidase D (EC 3.4.17.22) (Metallocarboxypeptidase D) (gp180)
O75976	CPD	626	0	K.SQEGDSISVIGRN*NSNNFDLNR.N	2.298	-0.53	813.717	3	ISVIGRNNSNNFD	3	Carboxypeptidase D (EC 3.4.17.22) (Metallocarboxypeptidase D) (gp180)
O75976	CPD	811	61.56	R.GILN*ATISVAEINHPVTTYK.T	1.998	0.06	715.388	3	DGRGILNATISVA	4	Carboxypeptidase D (Fragment)
O75976	CPD	955	53.534	R.GLVMNYPHITN*LTNLGQSTEYR.H	4.043	2.83	1262.63	2	NYPHITNLTNLGQ	1	Carboxypeptidase D (EC 3.4.17.22) (Metallocarboxypeptidase D) (gp180)
O75976	CPD	978	5.31	R.HIWSLEISNKPN*VSEPEEPK.I	2.981	0.13	584.797	4	EISNKPNVSEPEE	7	Carboxypeptidase D (EC 3.4.17.22) (Metallocarboxypeptidase D) (gp180)
O75976	CPD	1070	1000	R.GKDLDTDFTN*N*ASQPETK.A	2.839	0.58	662.969	3	DTDFTNNASQPET	4	Carboxypeptidase D (Fragment)
O75976	CPD	1142	25.137	K.HLASLYANN*HPSMHMGQPSCPN*KSDENIPGGVMR.G	3.73	1.4	938.927	4	GQPSCPNKSDENI	1	Carboxypeptidase D (EC 3.4.17.22) (Metallocarboxypeptidase D) (gp180)
F8VR29	CPM	38	1000	K.TVAQN*YSSVTHLHSIGK.S	2.467	0.75	461.99	4	LKTVAQNYSSVTH	2	Carboxypeptidase M
P14384	CPM	384	1000	K.SQN*FSALKK.D	2.288	-0.05	513.279	2	IPEKSQNFSALKK	1	Carboxypeptidase M (CPM) (EC 3.4.17.12)
C9JI22	CPVL	11	1000	K.SYAGFLTVN*K.T	3.254	0.23	551.787	2	AGFLTVNKTYNSN	1	Probable serine carboxypeptidase CPVL (Fragment)
H7C0X5	CPVL	50	18.805	R.QAIHVGN*QTFNDGTIVEK.Y	3.212	0.38	658.666	3	QAIHVGNQTFNDG	3	Probable serine carboxypeptidase CPVL (Fragment)
Q6UVK1	CSPG4	1202	1000	R.AGQPATAFSQQDLLDGAVLYSHN*GSLSPR.D	3.81	-0.55	1001.83	3	AVLYSHNGSLSPR	4	Chondroitin sulfate proteoglycan 4 (Chondroitin sulfate proteoglycan NG2) (Melanoma chondroitin sulfate proteoglycan) (Melanoma-associated chondroitin sulfate proteoglycan)
O95196	CSPG5	355	1000	R.WHAVPPQHTLGSVPGSSIALRPRPGEPGRDLASSEN*GTECR.S	2.744	0.43	876.638	5	DLASSENGTECRS	2	Chondroitin sulfate proteoglycan 5 (Acidic leucine-rich EGF-like domain-containing brain protein) (Neuroglycan C)
P10619	CTSA	333	80.755	R.M^DPPCTN*TTAASTYLNNPYVR.K	4.494	-0.65	802.359	3	MDPPCTNTTAAST	3	Lysosomal protective protein (EC 3.4.16.5) (Carboxypeptidase C) (Carboxypeptidase L) (Cathepsin A) (Protective protein cathepsin A) (PPCA) (Protective protein for beta-galactosidase) [Cleaved into: Lysosomal protective protein 32 kDa chain; Lysosomal protective protein 20 kDa chain]
P07858	CTSB	192	1000	K.GLVSGGLYESHVGCRPYSIPPCEHHVN*GSRPPCTGEGDTPK.C	3.808	0.2	893.615	5	PCEHHVNGSRPPC	1	Cathepsin B (EC 3.4.22.1) (APP secretase) (APPS) (Cathepsin B1) [Cleaved into: Cathepsin B light chain; Cathepsin B heavy chain]
P53634	CTSC	276	0	R.ILTN*NSQTPILSPQEVVSCSQYAQGCEGGFPYLIAGK.Y	3.265	0.65	1343.99	3	RIRILTNNSQTPI	5	Dipeptidyl peptidase 1 (EC 3.4.14.1) (Cathepsin C) (Cathepsin J) (Dipeptidyl peptidase I) (DPP-I) (DPPI) (Dipeptidyl transferase) [Cleaved into: Dipeptidyl peptidase 1 exclusion domain chain (Dipeptidyl peptidase I exclusion domain chain); Dipeptidyl peptidase 1 heavy chain (Dipeptidyl peptidase I heavy chain); Dipeptidyl peptidase 1 light chain (Dipeptidyl peptidase I light chain)]
P07339	CTSD	263	1000	K.GSLSYLN*VTR.K	2.821	0.21	556.795	2	GSLSYLNVTRKAY	1	Cathepsin D (EC 3.4.23.5) [Cleaved into: Cathepsin D light chain; Cathepsin D heavy chain]
O60911	CTSV	292	0	K.NLDHGVLVVGYGFEGANSN*NSK.Y	2.782	1.49	765.37	3	FEGANSNNSKYWL	1	Cathepsin L2 (EC 3.4.22.43) (Cathepsin U) (Cathepsin V)
P78310	CXADR	106	0	K.SGDASIN*VTNLQLSDIGTYQCK.V	3.547	1.04	796.382	3	SGDASINVTNLQL	4	Coxsackievirus and adenovirus receptor (CAR) (hCAR) (CVB3-binding protein) (Coxsackievirus B-adenovirus receptor) (HCVADR)
P78310	CXADR	201	1000	K.MPTSWLAEMTSSVISVKN*ASSEYSGTYSCTVR.N	3.273	0.73	1178.21	3	SVISVKNASSEYS	11	Coxsackievirus and adenovirus receptor (CAR) (hCAR) (CVB3-binding protein) (Coxsackievirus B-adenovirus receptor) (HCVADR)
Q14118	DAG1	641	1000	K.LAFAFGDRN*CSTITLQN*ITR.G	2.515	-0.19	768.719	3	FAFGDRNCSTITL	2	Dystroglycan (Dystrophin-associated glycoprotein 1) [Cleaved into: Alpha-dystroglycan (Alpha-DG); Beta-dystroglycan (Beta-DG)]
Q14118	DAG1	649	1000	K.LAFAFGDRN*CSTITLQN*ITR.G	2.515	-0.19	768.719	3	STITLQNITRGSI	2	Dystroglycan (Dystrophin-associated glycoprotein 1) [Cleaved into: Alpha-dystroglycan (Alpha-DG); Beta-dystroglycan (Beta-DG)]
H0Y4G4	DCBLD1	46	24.437	K.SFVMNFKNN*NSK.W	2.364	-0.23	716.842	2	VMNFKNNNSKWKT	1	Discoidin, CUB and LCCL domain-containing protein 1 (Fragment)
Q5H993	DCBLD1	64	82.387	K.NYPGTYPN*HTVCEK.T	2.992	-3.34	841.869	2	YPGTYPNHTVCEK	1	Discoidin, CUB and LCCL domain-containing protein 1
Q8N8Z6	DCBLD1	277	1000	R.ASSSWQSVN*ESGDQVHWSPGQAR.L	2.69	1.26	835.043	3	SSWQSVNESGDQV	4	Discoidin, CUB and LCCL domain-containing protein 1
C9JIW6	DCBLD2	49	1000	K.YCGLGLQMN*HSIESK.G	1.879	-0.51	580.604	3	GLGLQMNHSIESK	3	Discoidin, CUB and LCCL domain-containing protein 2 (Fragment)
P49184	DNASE1L1	261	1000	R.SLLHTAAAFDFPTSFQLTEEEALN*ISDHYPVEVELK.L	4.28	-0.21	1017	4	TEEEALNISDHYP	1	Deoxyribonuclease-1-like 1 (EC 3.1.21.-) (DNase X) (Deoxyribonuclease I-like 1) (DNase I-like 1) (Muscle-specific DNase I-like) (XIB)
Q02487	DSC2	392	1000	R.AN*YTILK.G	2.054	0.1	413.234	2	TANWRANYTILKG	2	Desmocollin-2 (Cadherin family member 2) (Desmocollin-3) (Desmosomal glycoprotein II) (Desmosomal glycoprotein III)
Q02487	DSC2	546	24.243	K.NGIYN*ITVLASDQGGR.T	2.244	0.16	840.926	2	IKNGIYNITVLAS	1	Desmocollin-2 (Cadherin family member 2) (Desmocollin-3) (Desmosomal glycoprotein II) (Desmosomal glycoprotein III)
Q14574	DSC3	392	1000	R.VN*FTILK.G	1.961	-0.01	419.252	2	TANWRVNFTILKG	1	Desmocollin-3 (Cadherin family member 3) (Desmocollin-4) (HT-CP)
Q9UL01	DSE	642	71.753	R.GYPYN*GTNYVN*VTMHLR.S	3.17	0.64	1002.97	2	PRGYPYNGTNYVN	1	Dermatan-sulfate epimerase (cDNA FLJ56258, highly similar to Squamous cell carcinoma antigen recognized by T-cells 2)
Q9UL01	DSE	648	37.54	R.GYPYN*GTNYVN*VTMHLR.S	3.263	1.67	1002.97	2	NGTNYVNVTMHLR	1	Dermatan-sulfate epimerase (cDNA FLJ56258, highly similar to Squamous cell carcinoma antigen recognized by T-cells 2)
Q14126	DSG2	112	1000	K.DTGELN*VTSILDREETPFFLLTGYALDAR.G	4.096	-0.43	1087.21	3	KDTGELNVTSILD	3	Desmoglein-2 (Cadherin family member 5) (HDGC)
Q14126	DSG2	182	164.775	K.IN*ATDADEPN*TLNSK.I	3.735	0.04	804.872	2	TLVMKINATDADE	1	Desmoglein-2 (Cadherin family member 5) (HDGC)
Q14126	DSG2	462	1000	R.YVQN*GTYTVK.I	2.97	0.18	588.295	2	ESRYVQNGTYTVK	2	Desmoglein-2 (Cadherin family member 5) (HDGC)
B4DKB2	ECE1	166	1000	K.HLLEN*STASVSEAER.K	3.107	0.27	549.269	3	IKHLLENSTASVS	7	Endothelin-converting enzyme 1 (cDNA FLJ59212, highly similar to Endothelin-converting enzyme 1 (EC 3.4.24.71))
B4DKB2	ECE1	187	1000	R.ACM^N*ETRIEELR.A	1.71	-0.17	514.237	3	YYRACMNETRIEE	1	Endothelin-converting enzyme 1 (cDNA FLJ59212, highly similar to Endothelin-converting enzyme 1 (EC 3.4.24.71))
B4DKB2	ECE1	210	1000	R.LGGWN*ITGPWAK.D	2.176	1.13	651.841	2	ERLGGWNITGPWA	2	Endothelin-converting enzyme 1 (cDNA FLJ59212, highly similar to Endothelin-converting enzyme 1 (EC 3.4.24.71))
B4DKB2	ECE1	270	72.615	K.NSN*SNVIQVDQSGLGLPSRDYYLN*K.T	3.221	0.44	929.791	3	SRDYYLNKTENEK	3	Endothelin-converting enzyme 1 (cDNA FLJ59212, highly similar to Endothelin-converting enzyme 1 (EC 3.4.24.71))
B4DKB2	ECE1	316	1000	K.LLGGGDEEAIRPQMQQILDFETALAN*ITIPQEK.R	3.05	-1.16	1214.62	3	FETALANITIPQE	11	Endothelin-converting enzyme 1 (cDNA FLJ59212, highly similar to Endothelin-converting enzyme 1 (EC 3.4.24.71))
B4DKB2	ECE1	539	1000	R.FFN*FSWR.V	2.22	0.51	503.737	2	NAMRFFNFSWRVT	4	Endothelin-converting enzyme 1 (cDNA FLJ59212, highly similar to Endothelin-converting enzyme 1 (EC 3.4.24.71))
B4DKB2	ECE1	632	75.738	R.EYDKDGNLRPWWKN*SSVEAFKR.Q	3.19	-0.18	910.117	3	LRPWWKNSSVEAF	1	Endothelin-converting enzyme 1 (cDNA FLJ59212, highly similar to Endothelin-converting enzyme 1 (EC 3.4.24.71))
B4DKB2	ECE1	651	47.045	R.QTECMVEQYSN*YSVNGEPVN*GR.H	4.549	-2.51	856.363	3	MVEQYSNYSVNGE	1	Endothelin-converting enzyme 1 (cDNA FLJ59212, highly similar to Endothelin-converting enzyme 1 (EC 3.4.24.71))
B4DKB2	ECE1	660	28.529	R.QTECMVEQYSN*YSVNGEPVN*GR.H	4.549	-2.51	856.363	3	VNGEPVNGRHTLG	1	Endothelin-converting enzyme 1 (cDNA FLJ59212, highly similar to Endothelin-converting enzyme 1 (EC 3.4.24.71))
Q9HAV5	EDA2R	74	7.649	R.VQKVN*CTATSNAVCGDCLPR.F	3.212	-0.68	751.681	3	NRVQKVNCTATSN	4	Tumor necrosis factor receptor superfamily member 27 (X-linked ectodysplasin-A2 receptor) (EDA-A2 receptor)
F5H7K3	EFCAB14	153	38.189	K.VWIN*ITEM^NK.Q	1.81	-0.3	633.818	2	LNKVWINITEMNK	4	EF-hand calcium-binding domain-containing protein 14
F5H7K3	EFCAB14	283	1000	K.RQSLDQVTN*RTDTVK.I	2.009	0.13	588.643	3	SLDQVTNRTDTVK	3	EF-hand calcium-binding domain-containing protein 14
O75071	EFCAB14	296	2.64	R.QNDLKLEGMN*ETVSN*LTQR.V	2.974	0.17	732.691	3	LKLEGMNETVSNL	3	EF-hand calcium-binding domain-containing protein 14
O75071	EFCAB14	301	15.387	R.QNDLKLEGMN*ETVSN*LTQR.V	2.974	0.17	732.691	3	MNETVSNLTQRVN	3	EF-hand calcium-binding domain-containing protein 14
O75071	EFCAB14	324	1000	K.KAN*LSFSMMGDR.S	2.422	-0.04	453.881	3	KVEKKANLSFSMM	1	EF-hand calcium-binding domain-containing protein 14
P20827	EFNA1	26	24.243	R.HTVFWN*SSNPK.F	2.897	-0.08	660.317	2	RHTVFWNSSNPKF	1	Ephrin-A1 (EPH-related receptor tyrosine kinase ligand 1) (LERK-1) (Immediate early response protein B61) (Tumor necrosis factor alpha-induced protein 4) (TNF alpha-induced protein 4) [Cleaved into: Ephrin-A1, secreted form]
P52798	EFNA4	33	37.54	R.HVVYWN*SSNPR.L	2.717	0.02	681.328	2	RHVVYWNSSNPRL	1	Ephrin-A4 (EPH-related receptor tyrosine kinase ligand 4) (LERK-4)
D6RDV5	EFNA5	37	24.243	R.YAVYWN*SSNPR.F	2.066	-0.27	680.314	2	RYAVYWNSSNPRF	2	Ephrin-A5
D6RDV5	EFNA5	162	1000	K.VFVRPTN*DTVHESAEPSR.G	2.548	-0.12	511.755	4	VFVRPTNDTVHES	1	Ephrin-A5
P98172	EFNB1	139	40.362	K.HHDYYITSTSN*GSLEGLENR.E	4.03	-1.63	1148.52	2	YITSTSNGSLEGL	9	Ephrin-B1 (EFL-3) (ELK ligand) (ELK-L) (EPH-related receptor tyrosine kinase ligand 2) (LERK-2)
P52799	EFNB2	139	18.225	K.NKDYYIISTSN*GSLEGLDNQEGGVCQTR.A	3.536	-0.03	1041.15	3	YIISTSNGSLEGL	5	Ephrin-B2 (EPH-related receptor tyrosine kinase ligand 5) (LERK-5) (HTK ligand) (HTK-L)
Q15768	EFNB3	210	47.039	R.GAAHSLEPGKENLPGDPTSN*ATSR.G	2.705	0.1	603.044	4	PGDPTSNATSRGA	5	Ephrin-B3 (EPH-related receptor transmembrane ligand ELK-L3) (EPH-related receptor tyrosine kinase ligand 8) (LERK-8)
E9PFD7	EGFR	568	1000	R.EFVEN*SECIQCHPECLPQAMN*ITCTGR.G	3.59	6.24	1096.14	3	CLPQAMNITCTGR	1	Epidermal growth factor receptor
E9PFD7	EGFR	604	9.34	K.TCPAGVMGEN*NTLVWK.Y	3.078	2.47	890.42	2	GVMGENNTLVWKY	2	Epidermal growth factor receptor
E9PFD7	EGFR	623	125.672	K.YADAGHVCHLCHPN*CTYGCTGPGLEGCPTNGPK.I	3.766	-0.7	915.881	4	CHLCHPNCTYGCT	2	Epidermal growth factor receptor
B7Z902	EMB	25	46.129	K.N*ITLERPSNVN*LTCQFTTSGDLNAVN*VTWKK.D	3.971	-0.19	883.193	4	SMPVEKNITLERP	1	Embigin (Embigin homolog (Mouse), isoform CRA_c) (cDNA FLJ50040, highly similar to Embigin)
B7Z902	EMB	35	12.236	K.N*ITLERPSNVN*LTCQFTTSGDLNAVN*VTWKK.D	3.971	-0.19	883.193	4	ERPSNVNLTCQFT	1	Embigin (Embigin homolog (Mouse), isoform CRA_c) (cDNA FLJ50040, highly similar to Embigin)
B7Z902	EMB	50	2.185	K.N*ITLERPSNVN*LTCQFTTSGDLNAVN*VTWKK.D	3.971	-0.19	883.193	4	GDLNAVNVTWKKD	1	Embigin (Embigin homolog (Mouse), isoform CRA_c) (cDNA FLJ50040, highly similar to Embigin)
B7Z902	EMB	163	1000	K.YVIN*GTYAN*ETKLK.I	2.495	-0.31	810.418	2	MNKYVINGTYANE	3	Embigin (Embigin homolog (Mouse), isoform CRA_c) (cDNA FLJ50040, highly similar to Embigin)
B7Z902	EMB	168	1000	K.YVIN*GTYAN*ETKLK.I	2.495	-0.31	810.418	2	INGTYANETKLKI	3	Embigin (Embigin homolog (Mouse), isoform CRA_c) (cDNA FLJ50040, highly similar to Embigin)
M0QZ66	EMP3	47	0	K.ESLNLWYDCTWNN*DTK.T	2.99	-1.53	1031.44	2	YDCTWNNDTKTWA	2	Epithelial membrane protein 3 (Fragment)
B4DWB8	EMR2	111	2.185	K.TFKN*ESENTCQDVDECQQNPR.L	5.261	-0.17	868.027	3	GAKTFKNESENTC	2	EGF-like module-containing mucin-like hormone receptor-like 2 (cDNA FLJ60183, highly similar to Homo sapiens egf-like module containing, mucin-like, hormone receptor-like 2, transcript variant 6, mRNA)
Q07075	ENPEP	324	1000	K.HTAEYAAN*ITK.S	2.269	-0.02	611.303	2	TAEYAANITKSVF	1	Glutamyl aminopeptidase (EAP) (EC 3.4.11.7) (Aminopeptidase A) (AP-A) (Differentiation antigen gp160) (CD antigen CD249)
Q07075	ENPEP	607	37.54	K.EGITLN*SSNPSGNAFLK.I	3.752	-0.44	876.438	2	KEGITLNSSNPSG	2	Glutamyl aminopeptidase (EAP) (EC 3.4.11.7) (Aminopeptidase A) (AP-A) (Differentiation antigen gp160) (CD antigen CD249)
E9PE72	ENPP1	285	1000	K.M^N*ASFSLK.S	1.629	0.1	458.72	2	MYDPKMNASFSLK	3	Alkaline phosphodiesterase I
E9PE72	ENPP1	341	1000	K.M^YN*GSVPFEER.I	1.509	0.5	674.293	2	DIYKMYNGSVPFE	3	Alkaline phosphodiesterase I
P22413	ENPP1	477	12.79	R.N*LSCREPNQHFKPYLK.H	4.306	0.45	678.676	3	YEGIARNLSCREP	1	Ectonucleotide pyrophosphatase/phosphodiesterase family member 1 (E-NPP 1) (Membrane component chromosome 6 surface marker 1) (Phosphodiesterase I/nucleotide pyrophosphatase 1) (Plasma-cell membrane glycoprotein PC-1) [Includes: Alkaline phosphodiesterase I (EC 3.1.4.1); Nucleotide pyrophosphatase (NPPase) (EC 3.6.1.9)]
Q9Y6X5	ENPP4	128	23.523	K.HFSDSNDKDPFWWNEAVPIWVTNQLQEN*R.S	2.898	1.24	894.669	4	TNQLQENRSSAAA	2	Bis(5'-adenosyl)-triphosphatase ENPP4 (EC 3.6.1.29) (AP3A hydrolase) (AP3Aase) (Ectonucleotide pyrophosphatase/phosphodiesterase family member 4) (E-NPP 4) (NPP-4)
Q9Y6X5	ENPP4	166	0	R.LNN*ITMWLN*NSNPPVTFATLYWEEPDASGHK.Y	5.523	0.75	1189.23	3	FEERLNNITMWLN	1	Bis(5'-adenosyl)-triphosphatase ENPP4 (EC 3.6.1.29) (AP3A hydrolase) (AP3Aase) (Ectonucleotide pyrophosphatase/phosphodiesterase family member 4) (E-NPP 4) (NPP-4)
Q9Y6X5	ENPP4	172	7.71	R.LNN*ITMWLN*NSNPPVTFATLYWEEPDASGHK.Y	3.427	0.52	1189.23	3	NITMWLNNSNPPV	2	Bis(5'-adenosyl)-triphosphatase ENPP4 (EC 3.6.1.29) (AP3A hydrolase) (AP3Aase) (Ectonucleotide pyrophosphatase/phosphodiesterase family member 4) (E-NPP 4) (NPP-4)
Q9Y6X5	ENPP4	202	1000	K.YGPEDKEN*MSR.V	1.787	-1.51	664.786	2	GPEDKENMSRVLK	1	Bis(5'-adenosyl)-triphosphatase ENPP4 (EC 3.6.1.29) (AP3A hydrolase) (AP3Aase) (Ectonucleotide pyrophosphatase/phosphodiesterase family member 4) (E-NPP 4) (NPP-4)
Q9Y6X5	ENPP4	276	42.869	K.IN*RTEVYNK.L	2.221	-0.15	380.536	3	AILPKINRTEVYN	2	Bis(5'-adenosyl)-triphosphatase ENPP4 (EC 3.6.1.29) (AP3A hydrolase) (AP3Aase) (Ectonucleotide pyrophosphatase/phosphodiesterase family member 4) (E-NPP 4) (NPP-4)
Q9Y6X5	ENPP4	286	12.058	K.LKN*CSPHMNVYLK.E	2.593	-0.07	402.455	4	VYNKLKNCSPHMN	3	Bis(5'-adenosyl)-triphosphatase ENPP4 (EC 3.6.1.29) (AP3A hydrolase) (AP3Aase) (Ectonucleotide pyrophosphatase/phosphodiesterase family member 4) (E-NPP 4) (NPP-4)
Q9Y5L3	ENTPD2	294	5.75	R.GFSTQVLLGDVYQSPCTMAQRPQNFN*SSAR.V	3.169	1.06	1121.53	3	QRPQNFNSSARVS	1	Ectonucleoside triphosphate diphosphohydrolase 2 (NTPDase 2) (EC 3.6.1.-) (CD39 antigen-like 1) (Ecto-ATP diphosphohydrolase 2) (Ecto-ATPDase 2) (Ecto-ATPase 2)
P29317	EPHA2	435	1000	R.TASVSIN*QTEPPK.V	2.502	-0.98	687.853	2	TASVSINQTEPPK	3	Ephrin type-A receptor 2 (EC 2.7.10.1) (Epithelial cell kinase) (Tyrosine-protein kinase receptor ECK)
C9JXA2	EPHA3	232	0	R.GSCVN*NSKEEDPPR.M	2.563	0.31	531.235	3	VRGSCVNNSKEED	1	Ephrin type-A receptor 3
C9JXA2	EPHA3	493	1000	R.GTN*VTISSLKPDTIYVFQIR.A	3.354	-0.04	752.41	3	LRARGTNVTISSL	3	Ephrin type-A receptor 3
B7Z6Q8	EPHA4	184	0	R.GSCVN*NSEEKDVPK.M	2.291	-0.18	783.353	2	VRGSCVNNSEEKD	1	Ephrin type-A receptor 4 (cDNA FLJ53205, highly similar to Ephrin type-A receptor 4 (EC 2.7.10.1))
F8VP57	EPHA5	264	1000	R.HLAVFPDTITGADSSQLLEVSGSCVN*HSVTDEPPK.M	3.209	1.07	928.45	4	VSGSCVNHSVTDE	1	Ephrin type-A receptor 5
F8VP57	EPHA5	299	1000	K.AGYEEKN*GTCQVCRPGFFK.A	2.256	-0.68	563.509	4	AGYEEKNGTCQVC	3	Ephrin type-A receptor 5
F8VP57	EPHA5	461	2.017	R.QYVSVN*VTTNQAAPSPVTNVK.K	3.291	1.7	740.719	3	RQYVSVNVTTNQA	2	Ephrin type-A receptor 5
B1AKC9	EPHB2	259	1000	K.AGFEAVEN*GTVCR.G	2.871	0.48	706.822	2	GFEAVENGTVCRG	2	Ephrin type-B receptor 2
P54753	EPHB3	445	2.017	R.YAAVN*ITTNQAAPSEVPTLR.L	3.076	0.12	707.035	3	PRYAAVNITTNQA	1	Ephrin type-B receptor 3 (EC 2.7.10.1) (EPH-like tyrosine kinase 2) (EPH-like kinase 2) (Embryonic kinase 2) (EK2) (hEK2) (Tyrosine-protein kinase TYRO6)
P54760	EPHB4	203	1000	K.CAQLTVN*LTR.F	2.129	0.63	589.808	2	CAQLTVNLTRFPE	2	Ephrin type-B receptor 4 (EC 2.7.10.1) (Hepatoma transmembrane kinase) (Tyrosine-protein kinase TYRO11)
P54760	EPHB4	335	1000	R.LN*GSSLHLEWSAPLESGGREDLTYALR.C	2.854	0.54	992.165	3	SVVSRLNGSSLHL	4	Ephrin type-B receptor 4 (EC 2.7.10.1) (Hepatoma transmembrane kinase) (Tyrosine-protein kinase TYRO11)
B4DTR1	ERBB2	254	1000	R.GHCWGPGPTQCVN*CSQFLR.G	2.915	0.04	755.328	3	GPTQCVNCSQFLR	4	Receptor tyrosine-protein kinase erbB-2 (cDNA FLJ59426, highly similar to Receptor tyrosine-protein kinase erbB-2 (EC 2.7.10.1))
B4DTR1	ERBB2	295	1000	R.HCLPCHPECQPQN*GSVTCFGPEADQCVACAHYK.D	3.276	-1.18	784.323	5	PECQPQNGSVTCF	7	Receptor tyrosine-protein kinase erbB-2 (cDNA FLJ59426, highly similar to Receptor tyrosine-protein kinase erbB-2 (EC 2.7.10.1))
B4DTR1	ERBB2	353	1000	K.FPDEEGACQPCPIN*CTHSCVDLDDKGCPAEQR.A	3.71	-0.14	942.136	4	CQPCPINCTHSCV	3	Receptor tyrosine-protein kinase erbB-2 (cDNA FLJ59426, highly similar to Receptor tyrosine-protein kinase erbB-2 (EC 2.7.10.1))
B4DGQ7	ERBB3	566	1000	R.EFAHEAECFSCHPECQPMEGTATCN*GSGSDTCAQCAHFR.D	2.724	0.51	908.148	5	EGTATCNGSGSDT	1	Receptor tyrosine-protein kinase erbB-3 (cDNA FLJ59207, highly similar to Receptor tyrosine-protein kinase erbB-3 (EC 2.7.10.1))
F8VPA6	ERGIC2	212	1000	R.GHAHLAALVN*HESYN*FSHR.I	3.982	1.26	542.262	4	VNHESYNFSHRID	1	Endoplasmic reticulum-Golgi intermediate compartment protein 2 (Fragment)
C9JIE7	ESAM	42	1000	R.LQGVPHVGAN*VTLSCQSPR.S	3.795	-0.17	675.014	3	VPHVGANVTLSCQ	6	Endothelial cell-selective adhesion molecule (Fragment)
O43909	EXTL3	290	76.733	R.KSDTQNLLYN*VSTGR.A	4.224	-0.16	849.931	2	TQNLLYNVSTGRA	2	Exostosin-like 3 (EC 2.4.1.223) (EXT-related protein 1) (Glucuronyl-galactosyl-proteoglycan 4-alpha-N-acetylglucosaminyltransferase) (Hereditary multiple exostoses gene isolog) (Multiple exostosis-like protein 3) (Putative tumor suppressor protein EXTL3)
P25116	F2R	62	43.557	R.NPNDKYEPFWEDEEKN*ESGLTEYR.L	3.333	0.22	748.831	4	WEDEEKNESGLTE	1	Proteinase-activated receptor 1 (PAR-1) (Coagulation factor II receptor) (Thrombin receptor)
A8MVW0	FAM171A2	66	1000	R.ASVDVFGN*R.T	1.98	-0.19	484.24	2	SVDVFGNRTLLAA	3	Protein FAM171A2
Q6P995	FAM171B	213	0	K.LPDNHHISN*VTGYLTVLQQFLK.V	3.158	0.12	635.84	4	DNHHISNVTGYLT	1	Protein FAM171B
Q8TBP5	FAM174A	83	15.007	R.GSEGGN*GSNPVAGLETDDHGGK.A	2.753	-2.34	686.633	3	RGSEGGNGSNPVA	3	Membrane protein FAM174A (Hepatitis C virus NS5A-transactivated protein 6) (HCV NS5A-transactivated protein 6) (Transmembrane protein 157)
O75063	FAM20B	193	5.75	R.TEIKPVATEQLLSTFLTVGN*NTCFYGK.C	3.483	-0.59	759.388	4	TFLTVGNNTCFYG	2	Glycosaminoglycan xylosylkinase (EC 2.7.1.-) (Protein FAM20B) (Xylose kinase)
H7C5Z8	FAS	118	1000	R.LCDEGHGLEVEIN*CTR.T	3.708	-0.77	635.616	3	GLEVEINCTRTQN	2	Tumor necrosis factor receptor superfamily member 6
H7C5Z8	FAS	136	6.454	R.CKPNFFCN*STVCEHCDPCTK.C	2.815	-0.07	855.339	3	KPNFFCNSTVCEH	7	Tumor necrosis factor receptor superfamily member 6
Q14517	FAT1	1940	1000	K.TGALTVQN*TTQLR.S	2.497	-0.6	703.38	2	GALTVQNTTQLRS	4	Protocadherin Fat 1 (Cadherin family member 7) (Cadherin-related tumor suppressor homolog) (Protein fat homolog) [Cleaved into: Protocadherin Fat 1, nuclear form]
Q14517	FAT1	4152	22.327	R.CQSDIDECSGNPCLHGALCENTHGSYHCN*CSHEYR.G	4.52	1.16	846.328	5	HGSYHCNCSHEYR	2	Protocadherin Fat 1 (Cadherin family member 7) (Cadherin-related tumor suppressor homolog) (Protein fat homolog) [Cleaved into: Protocadherin Fat 1, nuclear form]
E9PQ73	FAT3	192	1000	R.KQIDWESFPYGYN*LTLQAK.D	3.646	-0.08	768.719	3	SFPYGYNLTLQAK	1	Protocadherin Fat 3
E9PQ73	FAT3	3052	1000	R.EQQSSYN*ISVR.A	2.213	-0.86	657.314	2	EQQSSYNISVRAT	1	Protocadherin Fat 3
Q6V0I7	FAT4	676	58.551	R.IN*VSLLDINDNSPVFYPVQYFAHIK.E	3.591	0.13	970.504	3	SSMARINVSLLDI	4	Protocadherin Fat 4 (hFat4) (Cadherin family member 14) (FAT tumor suppressor homolog 4) (Fat-like cadherin protein FAT-J)
Q6V0I7	FAT4	2921	132.105	R.IN*ATTGEIFNK.Q	3.005	0.66	605.814	2	SEYFRINATTGEI	2	Protocadherin Fat 4 (hFat4) (Cadherin family member 14) (FAT tumor suppressor homolog 4) (Fat-like cadherin protein FAT-J)
M0QYM4	FCGRT	125	1000	K.GPYTLQGLLGCELGPDN*TSVPTAK.F	2.989	3.28	1246.12	2	CELGPDNTSVPTA	4	IgG receptor FcRn large subunit p51 (Fragment)
P11362	FGFR1	317	1000	K.TAGVN*TTDKEMEVLHLR.N	2.159	0.27	639.659	3	LKTAGVNTTDKEM	2	Fibroblast growth factor receptor 1 (FGFR-1) (EC 2.7.10.1) (Basic fibroblast growth factor receptor 1) (BFGFR) (bFGF-R-1) (Fms-like tyrosine kinase 2) (FLT-2) (N-sam) (Proto-oncogene c-Fgr) (CD antigen CD331)
P21802	FGFR2	83	6.591	K.DGVHLGPNN*R.T	2.72	-0.16	361.18	3	VHLGPNNRTVLIG	1	Fibroblast growth factor receptor 2 (FGFR-2) (EC 2.7.10.1) (K-sam) (KGFR) (Keratinocyte growth factor receptor) (CD antigen CD332)
E7EVR7	FGFR2	150	1000	R.SPHRPILQAGLPAN*ASTVVGGDVEFVCK.V	4.82	-0.57	974.839	3	QAGLPANASTVVG	1	Fibroblast growth factor receptor (EC 2.7.10.1)
H7BXU9	FGFR2	229	1000	K.AAGVN*TTDKEIEVLYIR.N	3.506	-0.51	632.338	3	LKAAGVNTTDKEI	2	Fibroblast growth factor receptor 2 (Fragment)
F8W9L4	FGFR3	98	1000	R.LQVLN*ASHEDSGAYSCR.Q	1.975	-0.07	637.291	3	QRLQVLNASHEDS	4	Fibroblast growth factor receptor (EC 2.7.10.1)
F8W9L4	FGFR3	225	25.827	R.HQQWSLVMESVVPSDRGN*YTCVVENK.F	4.282	-0.07	1022.48	3	VPSDRGNYTCVVE	1	Fibroblast growth factor receptor (EC 2.7.10.1)
F8W9L4	FGFR3	262	1000	R.SPHRPILQAGLPAN*QTAVLGSDVEFHCK.V	2.838	-0.27	762.142	4	QAGLPANQTAVLG	3	Fibroblast growth factor receptor (EC 2.7.10.1)
Q8N441	FGFRL1	255	1000	R.SKPVLTGTHPVN*TTVDFGGTTSFQCK.V	3.031	0.61	696.346	4	TGTHPVNTTVDFG	2	Fibroblast growth factor receptor-like 1 (FGF receptor-like protein 1) (FGF homologous factor receptor) (FGFR-like protein) (Fibroblast growth factor receptor 5) (FGFR-5)
Q8N441	FGFRL1	293	1000	K.RVEYGAEGRHN*STIDVGGQK.F	2.727	-0.09	544.771	4	GAEGRHNSTIDVG	3	Fibroblast growth factor receptor-like 1 (FGF receptor-like protein 1) (FGF homologous factor receptor) (FGFR-like protein) (Fibroblast growth factor receptor 5) (FGFR-5)
H0Y827	FKBP10	197	1000	R.TLSRPSETCN*ETTK.L	2.947	0.81	813.881	2	RPSETCNETTKLG	1	Peptidyl-prolyl cis-trans isomerase FKBP10 (Fragment)
M0R1M1	FKRP	29	1000	R.CLALN*VSLR.E	2.351	0.04	524.789	2	ARCLALNVSLREW	2	Fukutin-related protein (Fragment)
Q9H9S5	FKRP	209	1000	R.DLFN*LSAPLARPVGTSLFLQTALR.G	2.777	0.4	868.487	3	RARDLFNLSAPLA	2	Fukutin-related protein (EC 2.-.-.-)
B4E2W4	FKTN	92	47.743	K.NFEQVKN*TSHGSTSQCK.F	3.71	-0.47	652.298	3	NFEQVKNTSHGST	3	Fukutin (cDNA FLJ58999, highly similar to Fukutin (EC 2.-.-.-))
Q9NZU0	FLRT3	226	0	K.VFFNLVN*LTELSLVR.N	3.076	1.51	589.67	3	VFFNLVNLTELSL	3	Leucine-rich repeat transmembrane protein FLRT3 (Fibronectin-like domain-containing leucine-rich transmembrane protein 3)
E9PD35	FLT4	104	1000	K.VLLLHEVHAN*DTGSYVCYYK.Y	4.49	0.43	795.388	3	LHEVHANDTGSYV	1	Vascular endothelial growth factor receptor 3
E9PD35	FLT4	299	1000	R.SQQTHTELSSILTIHN*VSQHDLGSYVCK.A	3.348	0.29	637.914	5	SILTIHNVSQHDL	4	Vascular endothelial growth factor receptor 3
E9PD35	FLT4	515	28.986	R.AVTTQDAVNPIESLDTWTEFVEGKN*K.T	2.652	0.76	965.81	3	EFVEGKNKTVSKL	1	Vascular endothelial growth factor receptor 3
E9PD35	FLT4	527	17.009	K.LVIQNAN*VSAM^YK.C	2.3	1.33	735.382	2	LVIQNANVSAMYK	3	Vascular endothelial growth factor receptor 3
E9PD35	FLT4	594	34.773	R.LN*LSTLHDAHGNPLLLDCK.N	3.011	-0.6	712.033	3	LRWYRLNLSTLHD	1	Vascular endothelial growth factor receptor 3
Q5SZK8	FREM2	1584	5.085	K.FTITQVPIHGHLLFN*NTRPVMVFTK.Q	2.182	0.02	729.148	4	HGHLLFNNTRPVM	1	FRAS1-related extracellular matrix protein 2 (ECM3 homolog)
Q5SZK8	FREM2	1716	22.329	R.FIVTEAPQHGYLLNLDKGN*HSITQFTQADIDDMK.I	3.11	0.2	773.383	5	LNLDKGNHSITQF	1	FRAS1-related extracellular matrix protein 2 (ECM3 homolog)
Q5SZK8	FREM2	2236	86.344	R.LVLGTPQSNSPFGAAVGEQN*ETLIR.I	3.105	0.44	867.785	3	AAVGEQNETLIRI	1	FRAS1-related extracellular matrix protein 2 (ECM3 homolog)
Q5SZK8	FREM2	2427	4.085	K.YSDYDKTGSICASENIN*DTLTR.Y	4.112	-1	842.71	3	CASENINDTLTRY	4	FRAS1-related extracellular matrix protein 2 (ECM3 homolog)
Q6ZNA5	FRRS1	138	30.07	K.VYWNAPSSAPN*HTQFLVTVVEK.Y	3.258	1.01	1245.63	2	APSSAPNHTQFLV	1	Ferric-chelate reductase 1 (EC 1.-.-.-) (Stromal cell-derived receptor 2) (SDR-2)
P04066	FUCA1	268	20.354	R.WGQN*CSCHHGGYYNCEDK.F	2.573	-0.16	569.462	4	NDRWGQNCSCHHG	1	Tissue alpha-L-fucosidase (EC 3.2.1.51) (Alpha-L-fucosidase I) (Alpha-L-fucoside fucohydrolase 1) (Alpha-L-fucosidase 1)
Q7Z6V2	FUCA2	56	1000	R.SQN*DTVTPDVWYTSKPK.E	2.834	-0.55	656.986	3	HTWRSQNDTVTPD	1	Plasma alpha-L-fucosidase (Fragment)
Q6P4F1	FUT10	318	1000	K.LGVVPVYYGSPSITDWLPSN*K.S	2.704	-1.1	1148.09	2	TDWLPSNKSAILV	2	Alpha-(1,3)-fucosyltransferase 10 (EC 2.4.1.-) (Fucosyltransferase X) (Fuc-TX) (FucT-X) (Galactoside 3-L-fucosyltransferase 10) (Fucosyltransferase 10)
Q9ULV1	FZD4	59	11.015	R.ISMCQNLGYN*VTK.M	2.621	-1.05	765.862	2	CQNLGYNVTKMPN	2	Frizzled-4 (Fz-4) (hFz4) (FzE4) (CD antigen CD344)
P10253	GAA	390	1000	R.QVVEN*MTR.A	2.005	0.29	490.242	2	TRQVVENMTRAHF	1	Lysosomal alpha-glucosidase (EC 3.2.1.20) (Acid maltase) (Aglucosidase alfa) [Cleaved into: 76 kDa lysosomal alpha-glucosidase; 70 kDa lysosomal alpha-glucosidase]
P10253	GAA	882	0	R.N*NTIVNELVR.V	3.061	0.33	587.819	2	VIFLARNNTIVNE	1	Lysosomal alpha-glucosidase (EC 3.2.1.20) (Acid maltase) (Aglucosidase alfa) [Cleaved into: 76 kDa lysosomal alpha-glucosidase; 70 kDa lysosomal alpha-glucosidase]
F5GY99	GALNT1	35	71.949	K.INQFNLMASEMIALN*R.S	3.304	-0.52	934.468	2	SEMIALNRSLPDV	3	Polypeptide N-acetylgalactosaminyltransferase 1 soluble form
F2Z2M7	GALNT10	146	36.684	R.YLETLPN*TSIIIPFHNEGWSSLLR.T	3.235	-1.05	935.156	3	YLETLPNTSIIIP	2	Polypeptide N-acetylgalactosaminyltransferase 10
C9JGD4	GALNT10	266	108.903	R.IFMNTCNPSSLTQQWLFEHTN*STVLEK.F	5.081	4.18	1076.85	3	WLFEHTNSTVLEK	1	Polypeptide N-acetylgalactosaminyltransferase 10 (Uncharacterized protein)
C9J2C3	GALNT3	132	1000	K.TTN*LSVEEQKEK.E	2.238	0.03	470.24	3	KAFKTTNLSVEEQ	1	Polypeptide N-acetylgalactosaminyltransferase 3 (Fragment)
P54826	GAS1	117	1000	R.CPSHCISALIQLN*HTR.R	3.58	0.29	478.237	4	SALIQLNHTRRGP	1	Growth arrest-specific protein 1 (GAS-1)
J3KQG4	GBA	11	1000	-.MELSM^GPIQAN*HTGTGLLLTLQPEQK.F	3.187	0.42	942.814	3	MGPIQANHTGTGL	7	Glucosylceramidase
F5H241	GBA	72	1000	R.TYTYADTPDDFQLHN*FSLPEEDTKLK.I	2.558	-0.69	773.613	4	DDFQLHNFSLPEE	9	Glucosylceramidase
P04062	GBA	98	1000	R.RMELSM^GPIQAN*HTGTGLLLTLQPEQK.F	3.109	-0.5	994.847	3	MGPIQANHTGTGL	5	Glucosylceramidase (EC 3.2.1.45) (Acid beta-glucosidase) (Alglucerase) (Beta-glucocerebrosidase) (Beta-GC) (D-glucosyl-N-acylsphingosine glucohydrolase) (Imiglucerase)
F5H241	GBA	196	15.381	R.DLGPTLAN*STHHNVR.L	1.742	0.22	545.609	3	LGPTLANSTHHNV	2	Glucosylceramidase
Q02742	GCNT1	58	23.624	R.HLELAGENPSSDIN*CTK.V	4.743	0.45	944.436	2	NPSSDINCTKVLQ	3	Beta-1,3-galactosyl-O-glycosyl-glycoprotein beta-1,6-N-acetylglucosaminyltransferase (EC 2.4.1.102) (Core 2-branching enzyme) (Core2-GlcNAc-transferase) (C2GNT) (Core 2 GNT)
Q9UJ14	GGT7	267	1000	R.LPWSQVLAFAAAVAQDGFN*VTHDLAR.A	4.462	-0.91	934.147	3	VAQDGFNVTHDLA	1	Gamma-glutamyltransferase 7 (GGT 7) (EC 2.3.2.2) (Gamma-glutamyltransferase-like 3) (Gamma-glutamyltransferase-like 5) (Gamma-glutamyltranspeptidase 7) (Glutathione hydrolase 7) (EC 3.4.19.13) [Cleaved into: Gamma-glutamyltransferase 7 heavy chain; Gamma-glutamyltransferase 7 light chain]
P06280	GLA	139	1000	K.LGIYADVGN*K.T	1.966	0.21	526.779	2	IYADVGNKTCAGF	3	Alpha-galactosidase A (EC 3.2.1.22) (Alpha-D-galactosidase A) (Alpha-D-galactoside galactohydrolase) (Melibiase) (Agalsidase)
P06280	GLA	192	1000	K.HMSLALN*R.T	1.694	0.03	472.747	2	HMSLALNRTGRSI	1	Alpha-galactosidase A (EC 3.2.1.22) (Alpha-D-galactosidase A) (Alpha-D-galactoside galactohydrolase) (Melibiase) (Agalsidase)
P06280	GLA	215	1000	R.SIVYSCEWPLYMWPFQKPN*YTEIR.Q	4.918	-0.15	1037.49	3	WPFQKPNYTEIRQ	1	Alpha-galactosidase A (EC 3.2.1.22) (Alpha-D-galactosidase A) (Alpha-D-galactoside galactohydrolase) (Melibiase) (Agalsidase)
E7EQ29	GLB1	333	76.287	R.NNVITLN*ITGK.A	3.022	0.05	595.337	2	NNVITLNITGKAG	2	Beta-galactosidase
H0YNP1	GLCE	161	1000	K.N*LTEKPPHIEVYETAEDRDK.N	3.102	0.77	597.546	4	LSHYSKNLTEKPP	2	D-glucuronyl C5-epimerase
H3BM42	GLG1	165	1000	K.LN*LTTDPK.F	2.039	0.54	452.747	2	LWNYKLNLTTDPK	2	Golgi apparatus protein 1 (Golgi apparatus protein 1, isoform CRA_c)
H3BM42	GLG1	210	1000	K.GYM^VSCLVDHRGN*ITEYQCHQYITK.M	2.526	-0.03	773.604	4	LVDHRGNITEYQC	8	Golgi apparatus protein 1 (Golgi apparatus protein 1, isoform CRA_c)
H3BM42	GLG1	581	1000	R.LCHTHGWN*ETSEFM^PQGAVFSCLYR.H	2.766	-0.18	762.334	4	CHTHGWNETSEFM	10	Golgi apparatus protein 1 (Golgi apparatus protein 1, isoform CRA_c)
Q92896	GLG1	786	1000	K.KVDVVICLSTTVRN*DTLQEAK.E	2.912	0.45	598.822	4	LSTTVRNDTLQEA	7	Golgi apparatus protein 1 (CFR-1) (Cysteine-rich fibroblast growth factor receptor) (E-selectin ligand 1) (ESL-1) (Golgi sialoglycoprotein MG-160)
Q68CQ7	GLT8D1	257	37.54	R.QN*ITNQLEK.W	2.487	-2.24	545.784	2	TEWKRQNITNQLE	2	Glycosyltransferase 8 domain-containing protein 1 (EC 2.4.1.-)
Q9H1C3	GLT8D2	234	93.154	K.DLGISPSTCSFNPGVIVAN*MTEWK.H	3.953	-0.41	1313.62	2	PGVIVANMTEWKH	1	Glycosyltransferase 8 domain-containing protein 2 (EC 2.4.1.-)
H0YIE6	GNPTAB	57	23.624	K.NPSTN*VSVVVFDSTKDVEDAHSGLLK.G	2.813	-0.02	691.1	4	PKNPSTNVSVVVF	3	N-acetylglucosamine-1-phosphotransferase subunit alpha (Fragment)
H0YIK3	GNPTAB	67	1000	R.TN*VSHVVGQLDDIRK.N	3.609	0.16	561.969	3	FKMIRTNVSHVVG	1	N-acetylglucosamine-1-phosphotransferase subunit alpha (Fragment)
Q3T906	GNPTAB	376	1000	R.N*LSHLPTFSSPAIESHIHR.I	3.205	-0.89	716.035	3	HQDVFRNLSHLPT	1	N-acetylglucosamine-1-phosphotransferase subunits alpha/beta (EC 2.7.8.17) (GlcNAc-1-phosphotransferase subunits alpha/beta) (Stealth protein GNPTAB) (UDP-N-acetylglucosamine-1-phosphotransferase subunits alpha/beta) [Cleaved into: N-acetylglucosamine-1-phosphotransferase subunit alpha; N-acetylglucosamine-1-phosphotransferase subunit beta]
Q3T906	GNPTAB	551	1000	K.VILLPN*QTHYIIPK.G	2.452	0.1	826.487	2	KVILLPNQTHYII	1	N-acetylglucosamine-1-phosphotransferase subunits alpha/beta (EC 2.7.8.17) (GlcNAc-1-phosphotransferase subunits alpha/beta) (Stealth protein GNPTAB) (UDP-N-acetylglucosamine-1-phosphotransferase subunits alpha/beta) [Cleaved into: N-acetylglucosamine-1-phosphotransferase subunit alpha; N-acetylglucosamine-1-phosphotransferase subunit beta]
Q3T906	GNPTAB	699	1000	K.IPLVN*ISLLPK.D	2.345	-0.01	605.389	2	VKIPLVNISLLPK	4	N-acetylglucosamine-1-phosphotransferase subunits alpha/beta (EC 2.7.8.17) (GlcNAc-1-phosphotransferase subunits alpha/beta) (Stealth protein GNPTAB) (UDP-N-acetylglucosamine-1-phosphotransferase subunits alpha/beta) [Cleaved into: N-acetylglucosamine-1-phosphotransferase subunit alpha; N-acetylglucosamine-1-phosphotransferase subunit beta]
Q3T906	GNPTAB	1056	1000	R.IHELPLSLQDLTGLEHMLIN*CSK.M	3.913	0.86	888.793	3	LEHMLINCSKMLP	3	N-acetylglucosamine-1-phosphotransferase subunits alpha/beta (EC 2.7.8.17) (GlcNAc-1-phosphotransferase subunits alpha/beta) (Stealth protein GNPTAB) (UDP-N-acetylglucosamine-1-phosphotransferase subunits alpha/beta) [Cleaved into: N-acetylglucosamine-1-phosphotransferase subunit alpha; N-acetylglucosamine-1-phosphotransferase subunit beta]
B4DYH8	GNS	163	1000	K.YYN*YTLSIN*GK.A	2.987	-0.3	671.321	2	KNSKYYNYTLSIN	6	N-acetylglucosamine-6-sulfatase (cDNA FLJ54262, highly similar to N-acetylglucosamine-6-sulfatase (EC 3.1.6.14))
B4DYH8	GNS	169	1000	K.YYN*YTLSIN*GK.A	2.987	-0.3	671.321	2	NYTLSINGKARKH	6	N-acetylglucosamine-6-sulfatase (cDNA FLJ54262, highly similar to N-acetylglucosamine-6-sulfatase (EC 3.1.6.14))
F8W785	GOLIM4	229	58.132	R.KPDPAEQQN*VTQVAHSPQGYNTAR.E	3.072	-0.68	880.427	3	DPAEQQNVTQVAH	3	Golgi integral membrane protein 4
C9JYM4	GOLM1	109	1000	K.AVLVN*N*ITTGER.L	2.177	0.65	646.845	2	KAVLVNNITTGER	1	Golgi membrane protein 1 (Fragment)
Q8NBJ4	GOLM1	144	7.971	R.LQQDVLQFQKN*QTNLER.K	2.398	-0.21	702.367	3	VLQFQKNQTNLER	3	Golgi membrane protein 1 (Golgi membrane protein GP73) (Golgi phosphoprotein 2)
C9J4Y6	GPC1	29	19.843	R.ICPQGYTCCTSEMEENLAN*R.S	3.816	-1.04	1218.49	2	MEENLANRSHAEL	8	Glypican-1 (Fragment)
C9J4Y6	GPC1	66	1000	R.SFDDHFQHLLN*DSER.T	3.333	0	621.611	3	HFQHLLNDSERTL	3	Glypican-1 (Fragment)
P51654	GPC3	124	15.007	R.HAKN*YTNAMFK.N	2.493	0.16	443.217	3	VVRHAKNYTNAMF	2	Glypican-3 (GTR2-2) (Intestinal protein OCI-5) (MXR7) [Cleaved into: Secreted glypican-3]
H0Y3U6	GPC3	148	1000	K.SFISFYSALPGYICSHSPVAEN*DTLCWN*GQELVER.Y	3.863	-2.86	1351.62	3	HSPVAENDTLCWN	1	Secreted glypican-3 (Fragment)
H0Y3U6	GPC3	154	1000	K.SFISFYSALPGYICSHSPVAEN*DTLCWN*GQELVER.Y	3.863	-2.86	1351.62	3	NDTLCWNGQELVE	1	Secreted glypican-3 (Fragment)
P51654	GPC3	241	29.667	R.IFLQALNLGIEVIN*TTDHLK.F	3.55	-0.24	752.422	3	LGIEVINTTDHLK	2	Glypican-3 (GTR2-2) (Intestinal protein OCI-5) (MXR7) [Cleaved into: Secreted glypican-3]
G5E994	GPR107	169	52.403	K.VLGQSQEPNVNPASAGN*QTQK.T	3.297	-0.18	724.025	3	NPASAGNQTQKTQ	5	G protein-coupled receptor 107, isoform CRA_c (Protein GPR107)
Q96PE1	GPR124	602	1000	R.CTTGRPN*VSLSSFHIK.N	2.861	0.42	452.482	4	CTTGRPNVSLSSF	1	G-protein coupled receptor 124 (Tumor endothelial marker 5)
Q96PE1	GPR124	659	1000	R.LFHSHSN*TSRPGAAGPGKR.R	2.276	0.18	495.757	4	LFHSHSNTSRPGA	2	G-protein coupled receptor 124 (Tumor endothelial marker 5)
Q8IWK6	GPR125	98	1000	K.ISELKN*GSFSGLSLLER.L	3.317	0.34	618.335	3	KISELKNGSFSGL	2	Probable G-protein coupled receptor 125
Q8IWK6	GPR125	433	15.381	R.VLYMFNQMPLN*LTNAVATAR.Q	3.862	0.13	757.39	3	FNQMPLNLTNAVA	2	Probable G-protein coupled receptor 125
Q8IWK6	GPR125	652	13.38	K.LFPATGN*STNLADDGK.R	2.677	0.81	812.392	2	LFPATGNSTNLAD	2	Probable G-protein coupled receptor 125
H0YGP2	GPR126	80	0	K.LLKNN*ESLDEGLR.L	3.761	-0.3	501.935	3	QKLLKNNESLDEG	1	G-protein-coupled receptor 126 (Fragment)
Q86SQ4	GPR126	811	5.085	R.TQEVHHPICAFWDLNKN*K.S	3.835	0.66	747.365	3	FWDLNKNKSFGGW	2	G-protein coupled receptor 126 (Developmentally regulated G-protein-coupled receptor) (Vascular inducible G protein-coupled receptor)
Q86SQ4	GPR126	818	1000	K.SFGGWN*TSGCVAHR.D	2.833	-1.28	769.837	2	KSFGGWNTSGCVA	1	G-protein coupled receptor 126 (Developmentally regulated G-protein-coupled receptor) (Vascular inducible G protein-coupled receptor)
Q86V85	GPR180	105	1000	K.AQLTMTMN*QTEHN*LTVSQIPSPQTWHVFYADK.Y	3.372	-1.84	931.444	4	QLTMTMNQTEHNL	5	Integral membrane protein GPR180 (Intimal thickness-related receptor)
Q86V85	GPR180	110	1000	K.AQLTMTMN*QTEHN*LTVSQIPSPQTWHVFYADK.Y	3.372	-1.84	931.444	4	MNQTEHNLTVSQI	5	Integral membrane protein GPR180 (Intimal thickness-related receptor)
G3V186	GRID1	200	1000	K.VDKN*ISHVFTSLFTTMK.T	4.311	0.66	657.677	3	LQKVDKNISHVFT	1	Glutamate receptor ionotropic, delta-1 (Glutamate receptor, ionotropic, delta 1, isoform CRA_a)
K7EKL3	GRN	79	1000	K.CLSKEN*ATTDLLTK.L	3.061	0.64	798.906	2	KCLSKENATTDLL	1	Paragranulin (Fragment)
K7EKL3	GRN	344	1000	K.DVECGEGHFCHDN*QTCCR.D	1.448	0.48	571.71	4	GHFCHDNQTCCRD	1	Paragranulin (Fragment)
P78347	GTF2I	708	15.007	R.TPTQTN*GSNVPFKPR.G	2.915	1.21	549.618	3	RTPTQTNGSNVPF	1	General transcription factor II-I (GTFII-I) (TFII-I) (Bruton tyrosine kinase-associated protein 135) (BAP-135) (BTK-associated protein 135) (SRF-Phox1-interacting protein) (SPIN) (Williams-Beuren syndrome chromosomal region 6 protein)
P08236	GUSB	272	1000	K.VVAN*GTGTQGQLK.V	3.02	0.35	638.343	2	ENKVVANGTGTQG	1	Beta-glucuronidase (EC 3.2.1.31) (Beta-G1)
A0PJZ3	GXYLT2	233	1000	R.LFN*STQLAAMAPEHEIPK.I	2.923	0.52	667.34	3	KLLRLFNSTQLAA	1	Glucoside xylosyltransferase 2 (EC 2.4.2.n2) (Glycosyltransferase 8 domain-containing protein 4)
E5RJC4	HGSNAT	84	1000	R.FGEFGN*YSLLVK.N	3.105	-0.11	688.853	2	RFGEFGNYSLLVK	3	Heparan-alpha-glucosaminide N-acetyltransferase
P01892	HLA-A	110	1000	R.GYYN*QSEAGSHTVQR.M	2.472	0.5	567.257	3	TLRGYYNQSEAGS	3	HLA class I histocompatibility antigen, A-2 alpha chain (MHC class I antigen A*2)
P30450	HLA-A	110	1000	R.GYYN*QSEDGSHTIQR.M	4.151	-3.13	879.381	2	TLRGYYNQSEDGS	2	HLA class I histocompatibility antigen, A-26 alpha chain (MHC class I antigen A*26)
F6U0H7	HLA-B	121	1000	R.GYYN*QSEAGSHTLQSMYGCDVGPDGR.L	2.691	-3.07	951.394	3	NLRGYYNQSEAGS	12	HLA class I histocompatibility antigen, B-56 alpha chain (Fragment)
F6T2Q8	HLA-F	107	23.895	R.RYN*QSEAGSHTLQGMNGCDMGPDGR.L	3.354	0.37	686.039	4	NLLRRYNQSEAGS	1	HLA class I histocompatibility antigen, alpha chain F (Fragment)
P61978	HNRNPK	73	1000	R.TDYN*ASVSVPDSSGPER.I	3.133	-1.22	892.396	2	ALRTDYNASVSVP	2	Heterogeneous nuclear ribonucleoprotein K (hnRNP K) (Transformation up-regulated nuclear protein) (TUNP)
A6ND99	HS2ST1	82	58.132	K.NKYHVLHIN*TTK.N	2.784	0.1	368.454	4	YHVLHINTTKNNP	4	Heparan sulfate 2-O-sulfotransferase 1
A6ND99	HS2ST1	101	1000	R.FVKN*ITSWK.E	2.596	-0.7	375.878	3	QVRFVKNITSWKE	2	Heparan sulfate 2-O-sulfotransferase 1
B7Z5H6	HS6ST2	186	120.756	K.TFNMNFISPFTQYN*TTR.A	3.716	-1.29	1042.98	2	SPFTQYNTTRASS	1	Heparan-sulfate 6-O-sulfotransferase 2 (cDNA FLJ58047, highly similar to Heparan-sulfate 6-O-sulfotransferase 2 (EC 2.8.2.-))
P98160	HSPG2	3072	8.759	R.NQELEDNVHISPN*GSIITIVGTRPSNHGTYR.C	3.364	-3.16	856.177	4	NVHISPNGSIITI	1	Basement membrane-specific heparan sulfate proteoglycan core protein (HSPG) (Perlecan) (PLC) [Cleaved into: Endorepellin; LG3 peptide]
P98160	HSPG2	3780	1000	R.SLTQGSLIVGDLAPVN*GTSQGK.F	3.989	-0.36	1073.07	2	GDLAPVNGTSQGK	2	Basement membrane-specific heparan sulfate proteoglycan core protein (HSPG) (Perlecan) (PLC) [Cleaved into: Endorepellin; LG3 peptide]
P98160	HSPG2	4068	68.634	K.SQGLNLHTLLYLGGVEPSVPLSPATN*MSAHFR.G	3.766	-0.05	853.192	4	PLSPATNMSAHFR	2	Basement membrane-specific heparan sulfate proteoglycan core protein (HSPG) (Perlecan) (PLC) [Cleaved into: Endorepellin; LG3 peptide]
C9JBF5	HYAL2	103	1000	R.SVHGGVPQN*VSLWAHRK.M	2.34	-0.24	469.502	4	HGGVPQNVSLWAH	4	Hyaluronidase (EC 3.2.1.35) (Hyaluronoglucosaminidase) (Fragment)
B7Z909	HYOU1	428	1000	R.VFGSQN*LTTVK.L	2.268	0.46	598.824	2	RVFGSQNLTTVKL	1	Hypoxia up-regulated protein 1 (cDNA FLJ54708, highly similar to 150 kDa oxygen-regulated protein (Orp150))
K7EIL3	ICAM5	70	1000	R.REDHGAN*FSCR.A	3.325	-0.57	451.194	3	REDHGANFSCRAE	1	Intercellular adhesion molecule 5 (Fragment)
Q9UMF0	ICAM5	303	40.362	R.QLVCN*VTLGGENR.E	3.35	-0.3	731.864	2	ARQLVCNVTLGGE	4	Intercellular adhesion molecule 5 (ICAM-5) (Telencephalin)
Q9UMF0	ICAM5	646	73.311	R.VLAPGIYVCN*ATNR.H	3.98	0.05	775.898	2	PGIYVCNATNRHG	1	Intercellular adhesion molecule 5 (ICAM-5) (Telencephalin)
Q9UMF0	ICAM5	795	5.75	R.APPGALNIGLSSN*NSTLSVAGAM^GSHGGEYECAATNAHGR.H	4.466	2.36	979.705	4	NIGLSSNNSTLSV	1	Intercellular adhesion molecule 5 (ICAM-5) (Telencephalin)
Q9UMF0	ICAM5	796	0	R.APPGALNIGLSSNN*STLSVAGAMGSHGGEYECAATNAHGR.H	3.725	-0.02	975.703	4	IGLSSNNSTLSVA	6	Intercellular adhesion molecule 5 (ICAM-5) (Telencephalin)
K4DIA0	ICOSLG	102	1000	R.LFN*VTPQDEQK.F	2.783	0.76	661.33	2	FSLRLFNVTPQDE	1	ICOS ligand (Inducible T-cell co-stimulator ligand, isoform CRA_b)
B4DNT3	IFNAR1	12	1000	K.LSGCQN*ITSTK.C	3.224	-1.41	606.294	2	KLSGCQNITSTKC	1	Interferon alpha/beta receptor 1 (cDNA FLJ57545, highly similar to Interferon-alpha/beta receptor alpha chain)
B4DNT3	IFNAR1	41	1000	R.IRAEKEN*TSSWYEVDSFTPFRK.A	3.253	0.65	674.083	4	IRAEKENTSSWYE	2	Interferon alpha/beta receptor 1 (cDNA FLJ57545, highly similar to Interferon-alpha/beta receptor alpha chain)
B4DNT3	IFNAR1	347	1000	R.AHTMDEKLN*K.S	1.861	0.24	397.197	3	TMDEKLNKSSVFS	2	Interferon alpha/beta receptor 1 (cDNA FLJ57545, highly similar to Interferon-alpha/beta receptor alpha chain)
F5H5M7	IFNGR1	151	1000	R.MN*GSEIQYK.I	2.27	-0.28	536.747	2	NVYVRMNGSEIQY	1	Interferon gamma receptor 1
Q8TDY8	IGDCC4	625	1000	R.TPSMHN*QSHVPFAPAELK.V	2.259	-1.1	665.327	3	RTPSMHNQSHVPF	2	Immunoglobulin superfamily DCC subclass member 4 (Neighbor of punc e11) (Protein DDM36) (hDDM36)
C9J5X1	IGF1R	244	9.04	R.ACTENNECCHPECLGSCSAPDN*DTACVACR.H	2.825	-0.18	880.325	4	SCSAPDNDTACVA	9	Tyrosine-protein kinase receptor (EC 2.7.10.1)
C9J5X1	IGF1R	314	1000	R.N*GSQSMYCIPCEGPCPK.V	2.522	-1.04	994.398	2	PSGFIRNGSQSMY	1	Tyrosine-protein kinase receptor (EC 2.7.10.1)
C9J5X1	IGF1R	607	1000	R.TN*ASVPSIPLDVLSASN*SSSQLIVK.W	3.604	-0.33	845.117	3	ILYIRTNASVPSI	2	Tyrosine-protein kinase receptor (EC 2.7.10.1)
C9J5X1	IGF1R	622	1000	R.TN*ASVPSIPLDVLSASN*SSSQLIVK.W	3.604	-0.33	845.117	3	DVLSASNSSSQLI	2	Tyrosine-protein kinase receptor (EC 2.7.10.1)
C9J5X1	IGF1R	747	1000	R.DVMQVAN*TTMSSR.S	3.112	-0.09	721.829	2	DVMQVANTTMSSR	1	Tyrosine-protein kinase receptor (EC 2.7.10.1)
C9J5X1	IGF1R	913	1000	R.IQATSLSGN*GSWTDPVFFYVQAK.R	4.817	0.28	840.416	3	ATSLSGNGSWTDP	3	Tyrosine-protein kinase receptor (EC 2.7.10.1)
P11717	IGF2R	112	78.616	R.SLLEFN*TTVSCDQQGTNHR.V	3.747	1.15	1105.51	2	RSLLEFNTTVSCD	3	Cation-independent mannose-6-phosphate receptor (CI Man-6-P receptor) (CI-MPR) (M6PR) (300 kDa mannose 6-phosphate receptor) (MPR 300) (Insulin-like growth factor 2 receptor) (Insulin-like growth factor II receptor) (IGF-II receptor) (M6P/IGF2 receptor) (M6P/IGF2R) (CD antigen CD222)
P11717	IGF2R	435	9.394	R.MSVINFECN*KTAGNDGK.G	2.272	-0.1	629.953	3	VINFECNKTAGND	7	Cation-independent mannose-6-phosphate receptor (CI Man-6-P receptor) (CI-MPR) (M6PR) (300 kDa mannose 6-phosphate receptor) (MPR 300) (Insulin-like growth factor 2 receptor) (Insulin-like growth factor II receptor) (IGF-II receptor) (M6P/IGF2 receptor) (M6P/IGF2R) (CD antigen CD222)
P11717	IGF2R	543	1000	R.GCPEDAAVCAVDKN*GSK.N	4.036	-1.37	890.889	2	VCAVDKNGSKNLG	2	Cation-independent mannose-6-phosphate receptor (CI Man-6-P receptor) (CI-MPR) (M6PR) (300 kDa mannose 6-phosphate receptor) (MPR 300) (Insulin-like growth factor 2 receptor) (Insulin-like growth factor II receptor) (IGF-II receptor) (M6P/IGF2 receptor) (M6P/IGF2R) (CD antigen CD222)
P11717	IGF2R	581	1000	K.TN*ITLVCKPGDLESAPVLR.T	2.608	0.25	696.042	3	GKKIKTNITLVCK	5	Cation-independent mannose-6-phosphate receptor (CI Man-6-P receptor) (CI-MPR) (M6PR) (300 kDa mannose 6-phosphate receptor) (MPR 300) (Insulin-like growth factor 2 receptor) (Insulin-like growth factor II receptor) (IGF-II receptor) (M6P/IGF2 receptor) (M6P/IGF2R) (CD antigen CD222)
P11717	IGF2R	747	6.454	R.DAGVGFPEYQEEDN*STYNFR.W	2.351	0.14	780.998	3	EYQEEDNSTYNFR	4	Cation-independent mannose-6-phosphate receptor (CI Man-6-P receptor) (CI-MPR) (M6PR) (300 kDa mannose 6-phosphate receptor) (MPR 300) (Insulin-like growth factor 2 receptor) (Insulin-like growth factor II receptor) (IGF-II receptor) (M6P/IGF2 receptor) (M6P/IGF2R) (CD antigen CD222)
P11717	IGF2R	951	23.624	R.DPNSGFVFNLNPLN*SSQGYN*VSGIGK.I	3.753	-2.41	911.102	3	FNLNPLNSSQGYN	6	Cation-independent mannose-6-phosphate receptor (CI Man-6-P receptor) (CI-MPR) (M6PR) (300 kDa mannose 6-phosphate receptor) (MPR 300) (Insulin-like growth factor 2 receptor) (Insulin-like growth factor II receptor) (IGF-II receptor) (M6P/IGF2 receptor) (M6P/IGF2R) (CD antigen CD222)
P11717	IGF2R	957	30.392	R.DPNSGFVFNLNPLN*SSQGYN*VSGIGK.I	3.753	-2.41	911.102	3	NSSQGYNVSGIGK	6	Cation-independent mannose-6-phosphate receptor (CI Man-6-P receptor) (CI-MPR) (M6PR) (300 kDa mannose 6-phosphate receptor) (MPR 300) (Insulin-like growth factor 2 receptor) (Insulin-like growth factor II receptor) (IGF-II receptor) (M6P/IGF2 receptor) (M6P/IGF2R) (CD antigen CD222)
P11717	IGF2R	1246	0.229	R.HGNLYDLKPLGLN*DTIVSAGEYTYYFR.V	3.039	0.54	781.39	4	LKPLGLNDTIVSA	7	Cation-independent mannose-6-phosphate receptor (CI Man-6-P receptor) (CI-MPR) (M6PR) (300 kDa mannose 6-phosphate receptor) (MPR 300) (Insulin-like growth factor 2 receptor) (Insulin-like growth factor II receptor) (IGF-II receptor) (M6P/IGF2 receptor) (M6P/IGF2R) (CD antigen CD222)
P11717	IGF2R	1656	1000	R.N*GSSIVDLSPLIHR.T	2.275	-0.02	504.275	3	TECSVRNGSSIVD	1	Cation-independent mannose-6-phosphate receptor (CI Man-6-P receptor) (CI-MPR) (M6PR) (300 kDa mannose 6-phosphate receptor) (MPR 300) (Insulin-like growth factor 2 receptor) (Insulin-like growth factor II receptor) (IGF-II receptor) (M6P/IGF2 receptor) (M6P/IGF2R) (CD antigen CD222)
P11717	IGF2R	1757	5.021	R.VAGPPILNPIANEIYLNFESSTPCLADKHFN*YTSLIAFHCK.R	3.325	-0.49	933.866	5	LADKHFNYTSLIA	10	Cation-independent mannose-6-phosphate receptor (CI Man-6-P receptor) (CI-MPR) (M6PR) (300 kDa mannose 6-phosphate receptor) (MPR 300) (Insulin-like growth factor 2 receptor) (Insulin-like growth factor II receptor) (IGF-II receptor) (M6P/IGF2 receptor) (M6P/IGF2R) (CD antigen CD222)
P11717	IGF2R	1816	1000	R.M^DGCTLTDEQLLYSFN*LSSLSTSTFK.V	3.188	1.09	993.125	3	QLLYSFNLSSLST	1	Cation-independent mannose-6-phosphate receptor (CI Man-6-P receptor) (CI-MPR) (M6PR) (300 kDa mannose 6-phosphate receptor) (MPR 300) (Insulin-like growth factor 2 receptor) (Insulin-like growth factor II receptor) (IGF-II receptor) (M6P/IGF2 receptor) (M6P/IGF2R) (CD antigen CD222)
P11717	IGF2R	2136	15.381	R.AACAVKPQEVQMVN*GTITNPINGK.S	3.7	0.05	848.433	3	QEVQMVNGTITNP	6	Cation-independent mannose-6-phosphate receptor (CI Man-6-P receptor) (CI-MPR) (M6PR) (300 kDa mannose 6-phosphate receptor) (MPR 300) (Insulin-like growth factor 2 receptor) (Insulin-like growth factor II receptor) (IGF-II receptor) (M6P/IGF2 receptor) (M6P/IGF2R) (CD antigen CD222)
Q8WX77	IGFBPL1	166	1000	R.SVHN*VTGAQVGLSCEVR.A	2.711	-0.92	605.968	3	PPRSVHNVTGAQV	2	Insulin-like growth factor-binding protein-like 1 (IGFBP-related protein 10) (Insulin-like growth factor-binding-related protein 4) (IGFBP-rP4)
Q8N6C5	IGSF1	747	1000	R.MEDKDEGN*YSCR.T	3.261	-0.14	502.862	3	EDKDEGNYSCRTH	1	Immunoglobulin superfamily member 1 (IgSF1) (Immunoglobulin-like domain-containing protein 1) (Inhibin-binding protein) (InhBP) (Pituitary gland-specific factor 2) (p120)
Q8N6C5	IGSF1	1223	1000	K.GIGN*YSCSYR.L	2.213	-0.3	590.253	2	EGKGIGNYSCSYR	1	Immunoglobulin superfamily member 1 (IgSF1) (Immunoglobulin-like domain-containing protein 1) (Inhibin-binding protein) (InhBP) (Pituitary gland-specific factor 2) (p120)
O75054	IGSF3	101	1000	R.VQGN*STLLHITDLQAR.D	1.949	0.17	590.32	3	IERVQGNSTLLHI	3	Immunoglobulin superfamily member 3 (IgSF3) (Glu-Trp-Ile EWI motif-containing protein 3) (EWI-3)
O75054	IGSF3	655	24.437	R.KNYN*NTWTR.L	2.012	0.89	600.289	2	LWRKNYNNTWTRL	1	Immunoglobulin superfamily member 3 (IgSF3) (Glu-Trp-Ile EWI motif-containing protein 3) (EWI-3)
O75054	IGSF3	825	1000	R.LSQAQGN*LSVLETR.Q	2.397	0	506.938	3	LSQAQGNLSVLET	4	Immunoglobulin superfamily member 3 (IgSF3) (Glu-Trp-Ile EWI motif-containing protein 3) (EWI-3)
O75054	IGSF3	842	1000	R.QVQLECVVLN*R.T	2.56	0.02	680.861	2	LECVVLNRTSITS	1	Immunoglobulin superfamily member 3 (IgSF3) (Glu-Trp-Ile EWI motif-containing protein 3) (EWI-3)
O75054	IGSF3	961	1000	K.RAEDTAGQTALTVM^RPDASLQVDTVVPN*ATVSEK.A	3.234	0.13	898.203	4	VDTVVPNATVSEK	10	Immunoglobulin superfamily member 3 (IgSF3) (Glu-Trp-Ile EWI motif-containing protein 3) (EWI-3)
O75054	IGSF3	1077	1000	R.LTVLQASPQDTGN*YSCHVEEWLPSPQKEWYR.L	2.982	0.54	931.193	4	SPQDTGNYSCHVE	9	Immunoglobulin superfamily member 3 (IgSF3) (Glu-Trp-Ile EWI motif-containing protein 3) (EWI-3)
C9J8Z4	IGSF8	50	48.532	R.VAGTAVSISCN*VTGYEGPAQQNFEWFLYRPEAPDTALGIVSTK.D	4.539	1.49	1162.57	4	AVSISCNVTGYEG	1	Immunoglobulin superfamily member 8 (Fragment)
Q969P0	IGSF8	327	1000	R.RIGPGEPLELLCN*VSGALPPAGR.H	2.928	-0.05	792.758	3	PLELLCNVSGALP	5	Immunoglobulin superfamily member 8 (IgSF8) (CD81 partner 3) (Glu-Trp-Ile EWI motif-containing protein 2) (EWI-2) (Keratinocytes-associated transmembrane protein 4) (KCT-4) (LIR-D1) (Prostaglandin regulatory-like protein) (PGRL) (CD antigen CD316)
Q969P0	IGSF8	463	1000	R.GETASLLCN*ISVR.G	2.662	0.2	711.861	2	TASLLCNISVRGG	3	Immunoglobulin superfamily member 8 (IgSF8) (CD81 partner 3) (Glu-Trp-Ile EWI motif-containing protein 2) (EWI-2) (Keratinocytes-associated transmembrane protein 4) (KCT-4) (LIR-D1) (Prostaglandin regulatory-like protein) (PGRL) (CD antigen CD316)
P78552	IL13RA1	105	1000	R.ICLQVGSQCSTN*ESEKPSILVEK.C	3.329	0.57	870.428	3	GSQCSTNESEKPS	1	Interleukin-13 receptor subunit alpha-1 (IL-13 receptor subunit alpha-1) (IL-13R subunit alpha-1) (IL-13R-alpha-1) (IL-13RA1) (Cancer/testis antigen 19) (CT19) (CD antigen CD213a1)
Q96F46	IL17RA	49	1000	R.ALVCSQPGLN*CTVK.N	2.14	0.1	775.384	2	CSQPGLNCTVKNS	3	Interleukin-17 receptor A (IL-17 receptor A) (IL-17RA) (CDw217) (CD antigen CD217)
Q96F46	IL17RA	206	1000	K.VTTPCMSSGSLWDPN*ITVETLEAHQLR.V	3.553	0.29	1015.82	3	GSLWDPNITVETL	1	Interleukin-17 receptor A (IL-17 receptor A) (IL-17RA) (CDw217) (CD antigen CD217)
C9K0M1	IL17RC	347	33.657	K.GHPNLCVQVN*SSEK.L	2.425	-2.17	786.37	2	NLCVQVNSSEKLQ	2	Interleukin-17 receptor C (Fragment)
D6RH03	IL6ST	83	1000	K.EQYTIIN*R.T	1.633	-0.06	520.269	2	EQYTIINRTASSV	2	Interleukin-6 receptor subunit beta
D6RH03	IL6ST	227	12.431	K.VKPNPPHN*LSVINSEELSSILK.L	3.456	-0.21	806.776	3	KPNPPHNLSVINS	1	Interleukin-6 receptor subunit beta
P40189	IL6ST	379	1000	K.SHLQN*YTVN*ATK.L	3.044	-1.77	691.339	2	WKSHLQNYTVNAT	1	Interleukin-6 receptor subunit beta (IL-6 receptor subunit beta) (IL-6R subunit beta) (IL-6R-beta) (IL-6RB) (CDw130) (Interleukin-6 signal transducer) (Membrane glycoprotein 130) (gp130) (Oncostatin-M receptor subunit alpha) (CD antigen CD130)
P40189	IL6ST	383	1000	K.SHLQN*YTVN*ATK.L	3.044	-1.77	691.339	2	LQNYTVNATKLTV	1	Interleukin-6 receptor subunit beta (IL-6 receptor subunit beta) (IL-6R subunit beta) (IL-6R-beta) (IL-6RB) (CDw130) (Interleukin-6 signal transducer) (Membrane glycoprotein 130) (gp130) (Oncostatin-M receptor subunit alpha) (CD antigen CD130)
P40189	IL6ST	390	37.54	K.LTVN*LTNDR.Y	2.064	0.14	524.78	2	ATKLTVNLTNDRY	1	Interleukin-6 receptor subunit beta (IL-6 receptor subunit beta) (IL-6R subunit beta) (IL-6R-beta) (IL-6RB) (CDw130) (Interleukin-6 signal transducer) (Membrane glycoprotein 130) (gp130) (Oncostatin-M receptor subunit alpha) (CD antigen CD130)
Q9NX62	IMPAD1	259	1000	K.QVALQTFGN*QTTIIPAGGAGYK.V	4.215	-0.01	746.727	3	ALQTFGNQTTIIP	4	Inositol monophosphatase 3 (IMP 3) (IMPase 3) (EC 3.1.3.25) (EC 3.1.3.7) (Golgi 3-prime phosphoadenosine 5-prime phosphate 3-prime phosphatase) (Golgi-resident PAP phosphatase) (gPAPP) (Inositol monophosphatase domain-containing protein 1) (Inositol-1(or 4)-monophosphatase 3) (Myo-inositol monophosphatase A3)
M0R3E6	INSR	116	1000	K.WKPPSDPN*GN*ITHYLVFWER.Q	3.383	-0.53	616.303	4	KPPSDPNGNITHY	1	Insulin receptor (Fragment)
M0R3E6	INSR	118	1000	K.WKPPSDPN*GN*ITHYLVFWER.Q	3.383	-0.53	616.303	4	PSDPNGNITHYLV	1	Insulin receptor (Fragment)
P06213	INSR	282	1000	R.CVN*FSFCQDLHHK.C	2.516	-0.05	424.438	4	QDWRCVNFSFCQD	3	Insulin receptor (IR) (EC 2.7.10.1) (CD antigen CD220) [Cleaved into: Insulin receptor subunit alpha; Insulin receptor subunit beta]
P06213	INSR	322	2.806	K.CIPECPSGYTM^N*SSNLLCTPCLGPCPK.V	3.025	-2.49	1044.77	3	PSGYTMNSSNLLC	3	Insulin receptor (IR) (EC 2.7.10.1) (CD antigen CD220) [Cleaved into: Insulin receptor subunit alpha; Insulin receptor subunit beta]
P06213	INSR	424	58.433	R.GETLEIGN*YSFYALDNQNLR.Q	2.885	3.91	774.04	3	ETLEIGNYSFYAL	1	Insulin receptor (IR) (EC 2.7.10.1) (CD antigen CD220) [Cleaved into: Insulin receptor subunit alpha; Insulin receptor subunit beta]
P06213	INSR	445	1000	R.QLWDWSKHN*LTITQGK.L	1.942	0.35	653.339	3	WDWSKHNLTITQG	2	Insulin receptor (IR) (EC 2.7.10.1) (CD antigen CD220) [Cleaved into: Insulin receptor subunit alpha; Insulin receptor subunit beta]
P06213	INSR	698	1000	R.TWSPPFESEDSQKHN*QSEYEDSAGECCSCPK.T	3.014	1.51	920.617	4	EDSQKHNQSEYED	3	Insulin receptor (IR) (EC 2.7.10.1) (CD antigen CD220) [Cleaved into: Insulin receptor subunit alpha; Insulin receptor subunit beta]
P06213	INSR	920	1000	R.GLSPGN*YSVR.I	1.72	0.17	526.767	2	RGLSPGNYSVRIR	3	Insulin receptor (IR) (EC 2.7.10.1) (CD antigen CD220) [Cleaved into: Insulin receptor subunit alpha; Insulin receptor subunit beta]
I3L1X7	ITFG1	11	1000	K.VSFKN*HSALITSVVPGDYDGDSQMDVLLTYLPK.N	3.082	-0.93	903.955	4	VKVSFKNHSALIT	3	T-cell immunomodulatory protein (Fragment)
F5GXC5	ITFG1	240	31.275	K.N*TSGSNQQAFLLENVPCNN*ASCEEARR.M	3.356	0.83	1024.79	3	ALVILKNTSGSNQ	1	T-cell immunomodulatory protein
F5GXC5	ITFG1	258	17.009	K.N*TSGSNQQAFLLENVPCNN*ASCEEARR.M	3.356	0.83	1024.79	3	ENVPCNNASCEEA	1	T-cell immunomodulatory protein
B4DGG1	ITFG3	314	1000	K.SDPHWESMLN*ATTR.R	1.933	-0.72	824.369	2	HWESMLNATTRRM	3	Protein ITFG3 (Uncharacterized protein) (cDNA FLJ60496)
B4DGG1	ITFG3	389	1000	R.YKPDTLAVAVEN*GTGTDR.Q	3.789	0.01	637.318	3	LAVAVENGTGTDR	2	Protein ITFG3 (Uncharacterized protein) (cDNA FLJ60496)
P56199	ITGA1	100	9.558	K.LDLPVN*TSIPN*VTEVKEN*MTFGSTLVTNPNGGFLACGPLYAYR.C	3.806	-0.16	1170.58	4	KLDLPVNTSIPNV	1	Integrin alpha-1 (CD49 antigen-like family member A) (Laminin and collagen receptor) (VLA-1) (CD antigen CD49a)
P56199	ITGA1	105	12.497	K.LDLPVN*TSIPN*VTEVKEN*MTFGSTLVTNPNGGFLACGPLYAYR.C	3.806	-0.16	1170.58	4	VNTSIPNVTEVKE	1	Integrin alpha-1 (CD49 antigen-like family member A) (Laminin and collagen receptor) (VLA-1) (CD antigen CD49a)
P56199	ITGA1	112	13.326	K.LDLPVNTSIPN*VTEVKEN*MTFGSTLVTNPNGGFLACGPLYAYR.C	4.758	0.19	1169.83	4	VTEVKENMTFGST	1	Integrin alpha-1 (CD49 antigen-like family member A) (Laminin and collagen receptor) (VLA-1) (CD antigen CD49a)
P56199	ITGA1	217	16.198	K.QTQVGIVQYGEN*VTHEFNLNK.Y	2.595	-0.37	807.736	3	IVQYGENVTHEFN	2	Integrin alpha-1 (CD49 antigen-like family member A) (Laminin and collagen receptor) (VLA-1) (CD antigen CD49a)
P56199	ITGA1	532	1000	K.VYVYALN*QTR.F	2.366	-1.99	615.323	2	VYVYALNQTRFEY	3	Integrin alpha-1 (CD49 antigen-like family member A) (Laminin and collagen receptor) (VLA-1) (CD antigen CD49a)
P56199	ITGA1	840	47.045	R.SQNDKFN*VSLTVK.N	3.592	0.31	494.928	3	SQNDKFNVSLTVK	1	Integrin alpha-1 (CD49 antigen-like family member A) (Laminin and collagen receptor) (VLA-1) (CD antigen CD49a)
D6RG08	ITGA2	105	68.033	K.LNLQTSTSIPN*VTEM^K.T	2.976	1.37	897.957	2	TSTSIPNVTEMKT	5	Integrin alpha-2
E7EMF1	ITGA2	343	1000	R.YFFN*VSDEAALLEK.A	3.752	-0.45	824.903	2	TERYFFNVSDEAA	1	Integrin alpha-2
E7EMF1	ITGA2	460	117.251	R.AN*YTGQIVLYSVNENGN*ITVIQAHR.G	4.784	0.16	927.471	3	AGAPRANYTGQIV	1	Integrin alpha-2
E7EMF1	ITGA2	475	4.085	R.AN*YTGQIVLYSVNENGN*ITVIQAHR.G	4.784	0.16	927.471	3	SVNENGNITVIQA	1	Integrin alpha-2
P17301	ITGA2	1057	1000	R.TASCSN*VTCWLK.D	1.998	0.38	715.321	2	RTASCSNVTCWLK	2	Integrin alpha-2 (CD49 antigen-like family member B) (Collagen receptor) (Platelet membrane glycoprotein Ia) (GPIa) (VLA-2 subunit alpha) (CD antigen CD49b)
B4DDT0	ITGA3	40	1000	K.N*ITIVTGAPR.H	2.72	-0.07	522.8	2	FILHPKNITIVTG	1	Integrin alpha-3 (cDNA FLJ59664, highly similar to Integrin alpha-3)
H0YA49	ITGA3	76	7.455	R.SGEDAHEALLTLVVPPALLLSSVRPPGACQAN*ETIFCELGNPFKR.N	4.595	-1.91	1220.12	4	PGACQANETIFCE	2	Integrin alpha-3 (Fragment)
D6R9X8	ITGA3	107	1000	R.TGAVYLCPLTAHKDDCERMN*ITVK.N	3.471	-0.5	932.451	3	DDCERMNITVKND	1	Integrin alpha-3
P26006	ITGA3	511	1000	R.RN*ITLAYTLEADRDR.R	2.144	0.31	603.983	3	NPNYRRNITLAYT	2	Integrin alpha-3 (CD49 antigen-like family member C) (FRP-2) (Galactoprotein B3) (GAPB3) (VLA-3 subunit alpha) (CD antigen CD49c) [Cleaved into: Integrin alpha-3 heavy chain; Integrin alpha-3 light chain]
P26006	ITGA3	926	1000	R.AHCVWLECPIPDAPVVTN*VTVK.A	3.625	2.76	836.758	3	DAPVVTNVTVKAR	2	Integrin alpha-3 (CD49 antigen-like family member C) (FRP-2) (Galactoprotein B3) (GAPB3) (VLA-3 subunit alpha) (CD antigen CD49c) [Cleaved into: Integrin alpha-3 heavy chain; Integrin alpha-3 light chain]
E7EP60	ITGA4	138	1000	R.QPGEN*GSIVTCGHR.W	2.422	-3.21	757.846	2	SRQPGENGSIVTC	1	Integrin alpha-4 (Fragment)
E7EP60	ITGA4	480	1000	R.TRPVVIVDASLSHPESVN*R.T	2.113	-0.24	520.532	4	SHPESVNRTKFDC	4	Integrin alpha-4 (Fragment)
P13612	ITGA4	626	1000	R.FCAHEN*CSADLQVSAK.I	3.282	-1.11	613.934	3	RFCAHENCSADLQ	1	Integrin alpha-4 (CD49 antigen-like family member D) (Integrin alpha-IV) (VLA-4 subunit alpha) (CD antigen CD49d)
P13612	ITGA4	645	1000	K.IGFLKPHEN*KTYLAVGSM^K.T	2.313	1.73	538.79	4	FLKPHENKTYLAV	4	Integrin alpha-4 (CD49 antigen-like family member D) (Integrin alpha-IV) (VLA-4 subunit alpha) (CD antigen CD49d)
H0YHL9	ITGA5	61	1000	K.AN*TSQPGVLQGGAVYLCPWGASPTQCTPIEFDSK.G	4.299	-0.59	1213.9	3	VGAPKANTSQPGV	2	Integrin alpha-5 light chain (Fragment)
P08648	ITGA5	182	1000	R.TEKEPLSDPVGTCYLSTDN*FTR.I	4.64	-0.49	845.059	3	CYLSTDNFTRILE	3	Integrin alpha-5 (CD49 antigen-like family member E) (Fibronectin receptor subunit alpha) (Integrin alpha-F) (VLA-5) (CD antigen CD49e) [Cleaved into: Integrin alpha-5 heavy chain; Integrin alpha-5 light chain]
P08648	ITGA5	297	1000	K.GN*LTYGYVTILN*GSDIR.S	4.093	1.75	931.471	2	AGVPKGNLTYGYV	3	Integrin alpha-5 (CD49 antigen-like family member E) (Fibronectin receptor subunit alpha) (Integrin alpha-F) (VLA-5) (CD antigen CD49e) [Cleaved into: Integrin alpha-5 heavy chain; Integrin alpha-5 light chain]
P08648	ITGA5	307	1000	K.GN*LTYGYVTILN*GSDIR.S	4.093	1.75	931.471	2	GYVTILNGSDIRS	3	Integrin alpha-5 (CD49 antigen-like family member E) (Fibronectin receptor subunit alpha) (Integrin alpha-F) (VLA-5) (CD antigen CD49e) [Cleaved into: Integrin alpha-5 heavy chain; Integrin alpha-5 light chain]
P08648	ITGA5	675	17.512	K.NALN*LTFHAQNVGEGGAYEAELR.V	5.554	0.39	826.403	3	GDKNALNLTFHAQ	2	Integrin alpha-5 (CD49 antigen-like family member E) (Fibronectin receptor subunit alpha) (Integrin alpha-F) (VLA-5) (CD antigen CD49e) [Cleaved into: Integrin alpha-5 heavy chain; Integrin alpha-5 light chain]
P08648	ITGA5	712	1000	R.HPGN*FSSLSCDYFAVN*QSR.L	2.1	-0.54	731.321	3	LVRHPGNFSSLSC	7	Integrin alpha-5 (CD49 antigen-like family member E) (Fibronectin receptor subunit alpha) (Integrin alpha-F) (VLA-5) (CD antigen CD49e) [Cleaved into: Integrin alpha-5 heavy chain; Integrin alpha-5 light chain]
P08648	ITGA5	724	1000	R.HPGN*FSSLSCDYFAVN*QSR.L	2.1	-0.54	731.321	3	CDYFAVNQSRLLV	7	Integrin alpha-5 (CD49 antigen-like family member E) (Fibronectin receptor subunit alpha) (Integrin alpha-F) (VLA-5) (CD antigen CD49e) [Cleaved into: Integrin alpha-5 heavy chain; Integrin alpha-5 light chain]
P08648	ITGA5	773	24.437	K.NLN*NSQSDVVSFR.L	3.053	1.58	741.858	2	ILSKNLNNSQSDV	3	Integrin alpha-5 (CD49 antigen-like family member E) (Fibronectin receptor subunit alpha) (Integrin alpha-F) (VLA-5) (CD antigen CD49e) [Cleaved into: Integrin alpha-5 heavy chain; Integrin alpha-5 light chain]
P08648	ITGA5	868	11.015	R.VTGLN*CTTNHPINPK.G	2.787	-0.16	834.917	2	TRVTGLNCTTNHP	1	Integrin alpha-5 (CD49 antigen-like family member E) (Fibronectin receptor subunit alpha) (Integrin alpha-F) (VLA-5) (CD antigen CD49e) [Cleaved into: Integrin alpha-5 heavy chain; Integrin alpha-5 light chain]
H7BZ97	ITGA6	94	11.721	R.KYQTLN*CSVNVNCVNIR.C	3.03	0.15	695.675	3	RKYQTLNCSVNVN	5	Integrin alpha-6 heavy chain (Fragment)
C9JXX7	ITGA6	109	4.691	R.VEQKN*NTFFDMNIFEDGPYEVGGETEHDESLVPVPANSYLGFSLDSGK.G	3.829	0.87	1332.11	4	VRVEQKNNTFFDM	2	Integrin alpha-6 heavy chain (Fragment)
C9JXX7	ITGA6	170	1000	R.AN*HSGAVVLLK.R	2.115	-0.92	556.321	2	SGAPRANHSGAVV	1	Integrin alpha-6 heavy chain (Fragment)
P23229	ITGA6	770	17.009	K.QLSCVANQN*GSQADCELGNPFKR.N	3.606	3.12	1298.6	2	SCVANQNGSQADC	5	Integrin alpha-6 (CD49 antigen-like family member F) (VLA-6) (CD antigen CD49f) [Cleaved into: Integrin alpha-6 heavy chain; Integrin alpha-6 light chain]
H2N331	ITGA7	86	1000	R.QLQPRPQSWLLVGAPQALALPGQQAN*R.T	3.007	-0.07	980.873	3	LPGQQANRTGGLF	4	Integrin alpha-7 (Integrin, alpha 7, isoform CRA_e)
H2N331	ITGA7	742	15.007	R.ALDPAEKPLCLSNEN*ASHVECELGNPMKR.G	2.614	-0.1	821.391	4	LCLSNENASHVEC	1	Integrin alpha-7 (Integrin, alpha 7, isoform CRA_e)
H2N331	ITGA7	945	1000	K.KKN*ITLDCAR.G	2.364	-0.3	407.888	3	SAEKKKNITLDCA	1	Integrin alpha-7 (Integrin, alpha 7, isoform CRA_e)
P53708	ITGA8	122	1000	R.VN*GTKEPIEFK.S	2.189	0.1	422.227	3	NRKIRVNGTKEPI	2	Integrin alpha-8 [Cleaved into: Integrin alpha-8 heavy chain; Integrin alpha-8 light chain]
P53708	ITGA8	737	37.549	R.MVVCDLGNPMVSGTN*YSLGLR.F	3.248	0.22	762.699	3	PMVSGTNYSLGLR	2	Integrin alpha-8 [Cleaved into: Integrin alpha-8 heavy chain; Integrin alpha-8 light chain]
H7BZG1	ITGAV	25	1000	K.ISSLQTTEKN*DTVAGQGERDHLITKR.D	2.45	0.22	725.88	4	LQTTEKNDTVAGQ	4	Integrin alpha-V light chain (Fragment)
P06756	ITGAV	74	1000	K.AN*TTQPGIVEGGQVLK.C	2.429	-0.14	807.933	2	VGAPKANTTQPGI	2	Integrin alpha-V (Vitronectin receptor subunit alpha) (CD antigen CD51) [Cleaved into: Integrin alpha-V heavy chain; Integrin alpha-V light chain]
H7BZG1	ITGAV	96	0	K.SLLWTETFMNKENQN*HSYSLK.S	3.333	-0.11	858.412	3	MNKENQNHSYSLK	2	Integrin alpha-V light chain (Fragment)
P06756	ITGAV	488	0	R.ARPVITVNAGLEVYPSILNQDN*KTCSLPGTALK.V	4	0.3	886.475	4	SILNQDNKTCSLP	4	Integrin alpha-V (Vitronectin receptor subunit alpha) (CD antigen CD51) [Cleaved into: Integrin alpha-V heavy chain; Integrin alpha-V light chain]
P06756	ITGAV	554	1000	R.SPSHSKN*MTISR.G	2.058	-0.28	337.67	4	SPSHSKNMTISRG	1	Integrin alpha-V (Vitronectin receptor subunit alpha) (CD antigen CD51) [Cleaved into: Integrin alpha-V heavy chain; Integrin alpha-V light chain]
P06756	ITGAV	835	0	K.YNN*NTLLYILHYDIDGPM^N*CTSDM^EINPLR.I	3.533	2.51	1213.22	3	WPYKYNNNTLLYI	3	Integrin alpha-V (Vitronectin receptor subunit alpha) (CD antigen CD51) [Cleaved into: Integrin alpha-V heavy chain; Integrin alpha-V light chain]
P06756	ITGAV	851	46.016	K.YNN*NTLLYILHYDIDGPMN*CTSDMEINPLR.I	6.908	0.73	1202.55	3	DIDGPMNCTSDME	2	Integrin alpha-V (Vitronectin receptor subunit alpha) (CD antigen CD51) [Cleaved into: Integrin alpha-V heavy chain; Integrin alpha-V light chain]
H7C4N8	ITGB1	11	64.757	R.KEN*SSEICSNN*GECVCGQCVCR.K	6.706	-0.36	885.011	3	AYCRKENSSEICS	1	Integrin beta-1 (Fragment)
H7C4N8	ITGB1	19	48.874	R.KEN*SSEICSNN*GECVCGQCVCR.K	6.706	-0.36	885.011	3	SEICSNNGECVCG	1	Integrin beta-1 (Fragment)
E7EQW5	ITGB1	50	4.416	K.SCGECIQAGPNCGWCTN*STFLQEGM^PTSAR.C	3.07	0.47	1132.46	3	NCGWCTNSTFLQE	9	Integrin beta (Fragment)
P05556	ITGB1	212	12.236	R.NPCTSEQN*CTSPFSYK.N	1.987	0.01	641.598	3	PCTSEQNCTSPFS	7	Integrin beta-1 (Fibronectin receptor subunit beta) (Glycoprotein IIa) (GPIIA) (VLA-4 subunit beta) (CD antigen CD29)
P05556	ITGB1	406	38.189	K.NGVN*GTGEN*GRK.C	2.11	-0.31	403.526	3	YCKNGVNGTGENG	1	Integrin beta-1 (Fibronectin receptor subunit beta) (Glycoprotein IIa) (GPIIA) (VLA-4 subunit beta) (CD antigen CD29)
P05556	ITGB1	411	52.255	K.NGVN*GTGEN*GRK.C	2.11	-0.31	403.526	3	VNGTGENGRKCSN	1	Integrin beta-1 (Fibronectin receptor subunit beta) (Glycoprotein IIa) (GPIIA) (VLA-4 subunit beta) (CD antigen CD29)
P05556	ITGB1	481	1000	K.CHEGN*GTFECGACR.C	3.421	0.75	553.207	3	PKCHEGNGTFECG	3	Integrin beta-1 (Fibronectin receptor subunit beta) (Glycoprotein IIa) (GPIIA) (VLA-4 subunit beta) (CD antigen CD29)
P05556	ITGB1	520	8.534	R.HCECSTDEVNSEDMDAYCRKEN*SSEICSNN*GECVCGQCVCR.K	4.731	-0.01	1003.17	5	AYCRKENSSEICS	1	Integrin beta-1 (Fibronectin receptor subunit beta) (Glycoprotein IIa) (GPIIA) (VLA-4 subunit beta) (CD antigen CD29)
P05556	ITGB1	669	1000	K.DTCTQECSYFN*ITK.V	2.36	-3.34	885.363	2	QECSYFNITKVES	8	Integrin beta-1 (Fibronectin receptor subunit beta) (Glycoprotein IIa) (GPIIA) (VLA-4 subunit beta) (CD antigen CD29)
H7C5U2	ITGB5	167	1000	R.CN*GSGTYVCGLCECSPGYLGTR.C	3.933	1.98	1236.01	2	PNSARCNGSGTYV	1	Integrin beta (Fragment)
H7C5U2	ITGB5	242	1000	K.IYGPFCECDN*FSCAR.N	2.971	1.36	949.875	2	PFCECDNFSCARN	2	Integrin beta (Fragment)
H7C5U2	ITGB5	276	6.591	K.CHAGYIGDNCN*CSTDISTCR.G	4.779	2.6	1182.46	2	YIGDNCNCSTDIS	4	Integrin beta (Fragment)
H7C5U2	ITGB5	344	1000	R.DCVECLLLHSGKPDN*QTCHSLCR.D	4.491	-0.77	934.748	3	HSGKPDNQTCHSL	3	Integrin beta (Fragment)
Q9Y219	JAG2	570	124.207	R.CYNLEGDYYCACPDDFGGKN*CSVPR.E	4.06	-1.8	1007.4	3	DDFGGKNCSVPRE	1	Protein jagged-2 (Jagged2) (hJ2)
A8MQ45	JAM2	187	57.711	R.LGSQSTN*SSYTMNTK.T	4.202	1.54	811.368	2	LGSQSTNSSYTMN	4	Junctional adhesion molecule B
Q9BX67	JAM3	192	42.489	R.FRN*SSFHLN*SETGTLVFTAVHKDDSGQYYCIASNDAGSAR.C	4.101	0.51	886.61	5	ANPRFRNSSFHLN	2	Junctional adhesion molecule C (JAM-C) (JAM-2) (Junctional adhesion molecule 3) (JAM-3)
Q9BX67	JAM3	198	37.882	R.FRN*SSFHLN*SETGTLVFTAVHKDDSGQYYCIASNDAGSAR.C	4.101	0.51	886.61	5	NSSFHLNSETGTL	2	Junctional adhesion molecule C (JAM-C) (JAM-2) (Junctional adhesion molecule 3) (JAM-3)
C9J519	KIAA0319L	327	21.671	R.ALEVNTVTCQLN*CSDHGHCDSFTK.R	2.904	-0.06	699.803	4	TVTCQLNCSDHGH	5	Dyslexia-associated protein KIAA0319-like protein
B1AN15	KIAA0319L	395	2.366	K.VIVEGQNAHGEGYVN*VTVKPEPR.K	2.48	-0.97	832.43	3	HGEGYVNVTVKPE	7	Dyslexia-associated protein KIAA0319-like protein (Fragment)
Q6NSJ0	KIAA1161	398	31.275	R.VTLWVHPFVNYN*SSR.F	2.55	-0.24	607.977	3	HPFVNYNSSRFGE	1	Uncharacterized family 31 glucosidase KIAA1161 (EC 3.2.1.-)
A8MWY0	KIAA1324L	405	5.085	K.KDCPPCNPGFYNN*GSSSCHPCPPGTFSDGTK.E	3.53	-1.1	862.101	4	NPGFYNNGSSSCH	2	UPF0577 protein KIAA1324-like (Estrogen-induced gene 121-like protein) (hEIG121L)
A2RU67	KIAA1467	237	1000	K.MLSAFN*ATSGK.A	2.177	0.24	565.276	2	KMLSAFNATSGKA	1	Uncharacterized protein KIAA1467
A2RU67	KIAA1467	396	37.54	K.APDSN*CSNLLITTR.Q	3.912	0.71	782.88	2	VKAPDSNCSNLLI	1	Uncharacterized protein KIAA1467
J3QSR7	KIAA1549	1176	78.156	R.ATVAAGNSVVQVVN*VSR.L	4.325	0.12	837.457	2	SVVQVVNVSRLEG	3	UPF0606 protein KIAA1549
B4DN67	KIRREL	40	1000	R.IDGGPVILLQAGTPHN*LTCR.A	4.137	0.33	712.377	3	QAGTPHNLTCRAF	3	Kin of IRRE-like protein 1 (cDNA FLJ56360, highly similar to Kin of IRRE-like protein 1)
B4DN67	KIRREL	197	42.869	K.VGSTN*VSTLVNVHFAPR.I	3.428	0.08	600.988	3	NKVGSTNVSTLVN	4	Kin of IRRE-like protein 1 (cDNA FLJ56360, highly similar to Kin of IRRE-like protein 1)
P10721	KIT	130	1000	R.SLYGKEDN*DTLVR.C	2.01	-1	756.874	2	LYGKEDNDTLVRC	3	Mast/stem cell growth factor receptor Kit (SCFR) (EC 2.7.10.1) (Piebald trait protein) (PBT) (Proto-oncogene c-Kit) (Tyrosine-protein kinase Kit) (p145 c-kit) (v-kit Hardy-Zuckerman 4 feline sarcoma viral oncogene homolog) (CD antigen CD117)
C1P671	KREMEN1	47	77.53	R.GTQN*WTALQGGKPCLFWN*ETFQHPYNTLK.Y	3.087	-0.12	861.413	4	DYRGTQNWTALQG	1	Kremen protein 1 (Kringle containing transmembrane protein 1, isoform CRA_c)
C1P671	KREMEN1	61	22.329	R.GTQN*WTALQGGKPCLFWN*ETFQHPYNTLK.Y	3.087	-0.12	861.413	4	KPCLFWNETFQHP	1	Kremen protein 1 (Kringle containing transmembrane protein 1, isoform CRA_c)
F5H025	L1CAM	673	1000	K.VPGN*QTSTTLK.L	2.244	-0.26	574.806	2	LGKVPGNQTSTTL	1	Neural cell adhesion molecule L1
F5H025	L1CAM	728	1.65	K.YGPGEPSPVSETVVTPEAAPEKNPVDVKGEGN*ETTNMVITWKPLR.W	4.199	0.46	965.486	5	DVKGEGNETTNMV	1	Neural cell adhesion molecule L1
P25391	LAMA1	555	9.34	R.HQVSIN*NTAVMQR.L	3.11	-0.57	750.877	2	RHQVSINNTAVMQ	1	Laminin subunit alpha-1 (Laminin A chain) (Laminin-1 subunit alpha) (Laminin-3 subunit alpha) (S-laminin subunit alpha) (S-LAM alpha)
P25391	LAMA1	1045	1000	K.CEECEDGHWGYDAEVGCQACN*CSLVGSTHHR.C	2.476	-0.01	737.485	5	VGCQACNCSLVGS	5	Laminin subunit alpha-1 (Laminin A chain) (Laminin-1 subunit alpha) (Laminin-3 subunit alpha) (S-laminin subunit alpha) (S-LAM alpha)
P25391	LAMA1	1407	0	R.GPRPLVAPCVPCSCNN*HSDTCDPNTGK.C	2.494	-0.43	754.078	4	VPCSCNNHSDTCD	1	Laminin subunit alpha-1 (Laminin A chain) (Laminin-1 subunit alpha) (Laminin-3 subunit alpha) (S-laminin subunit alpha) (S-LAM alpha)
Q16787	LAMA3	1357	1000	R.TVRPQCEVCETHSFSFHPMAGCEGCN*CSR.R	3.442	11.27	1168.48	3	AGCEGCNCSRRGT	2	Laminin subunit alpha-3 (Epiligrin 170 kDa subunit) (E170) (Epiligrin subunit alpha) (Kalinin subunit alpha) (Laminin-5 subunit alpha) (Laminin-6 subunit alpha) (Laminin-7 subunit alpha) (Nicein subunit alpha)
H0YAP9	LAMA4	24	0	K.LSN*LSNLSHDLVQEAIDHAQDLQQEANELSR.K	3.71	-1.73	873.427	4	LQVKLSNLSNLSH	1	Laminin subunit alpha-4 (Fragment)
H0YAP9	LAMA4	27	9.296	K.LSNLSN*LSHDLVQEAIDHAQDLQQEANELSR.K	3.127	-1.08	873.428	4	KLSNLSNLSHDLV	1	Laminin subunit alpha-4 (Fragment)
Q16363	LAMA4	557	1000	R.LTLSELDDIIKN*ASGIYAEIDGAK.S	5.22	-0.45	851.445	3	LDDIIKNASGIYA	1	Laminin subunit alpha-4 (Laminin-14 subunit alpha) (Laminin-8 subunit alpha) (Laminin-9 subunit alpha)
Q16363	LAMA4	787	1000	R.DAVRN*LTEVVPQLLDQLR.T	2.69	-1.39	694.719	3	ARDAVRNLTEVVP	2	Laminin subunit alpha-4 (Laminin-14 subunit alpha) (Laminin-8 subunit alpha) (Laminin-9 subunit alpha)
Q16363	LAMA4	810	1000	K.RPASN*VSASIQR.I	2.713	0.9	430.234	3	QKRPASNVSASIQ	1	Laminin subunit alpha-4 (Laminin-14 subunit alpha) (Laminin-8 subunit alpha) (Laminin-9 subunit alpha)
E2QRK0	LAMA5	95	1000	K.LVGGPVAGGDPN*QTIR.G	2.163	-0.07	777.412	2	VAGGDPNQTIRGQ	3	Laminin subunit alpha-5
F2Z2S4	LAMA5	272	1000	K.RLN*TTGVSAGCTADLLVGR.A	2.735	0.69	655.342	3	VDLKRLNTTGVSA	2	Laminin subunit alpha-5
O15230	LAMA5	921	1000	R.LN*LTSPDLFWLVFR.Y	2.427	-0.22	862.469	2	RIVARLNLTSPDL	1	Laminin subunit alpha-5 (Laminin-10 subunit alpha) (Laminin-11 subunit alpha) (Laminin-15 subunit alpha)
O15230	LAMA5	2303	1000	R.TLSELMSQTGHLGLAN*ASAPSGEQLLR.T	2.738	0.55	928.808	3	GHLGLANASAPSG	4	Laminin subunit alpha-5 (Laminin-10 subunit alpha) (Laminin-11 subunit alpha) (Laminin-15 subunit alpha)
O15230	LAMA5	2423	1000	R.KQELSRDN*ATLQATLHAAR.D	2.297	-0.05	532.285	4	QELSRDNATLQAT	3	Laminin subunit alpha-5 (Laminin-10 subunit alpha) (Laminin-11 subunit alpha) (Laminin-15 subunit alpha)
O15230	LAMA5	2568	1000	R.AQQLLAN*STALEEAMLQEQQR.L	2.992	-0.34	792.396	3	AQQLLANSTALEE	1	Laminin subunit alpha-5 (Laminin-10 subunit alpha) (Laminin-11 subunit alpha) (Laminin-15 subunit alpha)
G3XAI2	LAMB1	1065	42.21	K.CVCNYLGTVQEHCN*GSDCQCDK.A	4.087	-0.28	903.011	3	TVQEHCNGSDCQC	2	Laminin subunit beta-1 (Laminin, beta 1, isoform CRA_a)
G3XAI2	LAMB1	1511	1000	K.QSAEDILLKTN*ATK.E	1.895	0.68	512.279	3	DILLKTNATKEKM	1	Laminin subunit beta-1 (Laminin, beta 1, isoform CRA_a)
P11047	LAMC1	1107	9.34	R.VN*NTLSSQISR.L	3.295	-0.31	611.319	2	DRLQRVNNTLSSQ	1	Laminin subunit gamma-1 (Laminin B2 chain) (Laminin-1 subunit gamma) (Laminin-10 subunit gamma) (Laminin-11 subunit gamma) (Laminin-2 subunit gamma) (Laminin-3 subunit gamma) (Laminin-4 subunit gamma) (Laminin-6 subunit gamma) (Laminin-7 subunit gamma) (Laminin-8 subunit gamma) (Laminin-9 subunit gamma) (S-laminin subunit gamma) (S-LAM gamma)
P11047	LAMC1	1161	47.039	K.VAAAN*VSVTQPESTGDPNN*MTLLAEEARK.L	2.956	2.39	1007.16	3	AKVAAANVSVTQP	3	Laminin subunit gamma-1 (Laminin B2 chain) (Laminin-1 subunit gamma) (Laminin-10 subunit gamma) (Laminin-11 subunit gamma) (Laminin-2 subunit gamma) (Laminin-3 subunit gamma) (Laminin-4 subunit gamma) (Laminin-6 subunit gamma) (Laminin-7 subunit gamma) (Laminin-8 subunit gamma) (Laminin-9 subunit gamma) (S-laminin subunit gamma) (S-LAM gamma)
P11047	LAMC1	1175	0	K.VAAAN*VSVTQPESTGDPNN*MTLLAEEARK.L	2.956	2.39	1007.16	3	STGDPNNMTLLAE	3	Laminin subunit gamma-1 (Laminin B2 chain) (Laminin-1 subunit gamma) (Laminin-10 subunit gamma) (Laminin-11 subunit gamma) (Laminin-2 subunit gamma) (Laminin-3 subunit gamma) (Laminin-4 subunit gamma) (Laminin-6 subunit gamma) (Laminin-7 subunit gamma) (Laminin-8 subunit gamma) (Laminin-9 subunit gamma) (S-laminin subunit gamma) (S-LAM gamma)
P11047	LAMC1	1223	85.29	R.TLAGEN*QTAFEIEELNR.K	3.609	-0.62	646.649	3	RTLAGENQTAFEI	3	Laminin subunit gamma-1 (Laminin B2 chain) (Laminin-1 subunit gamma) (Laminin-10 subunit gamma) (Laminin-11 subunit gamma) (Laminin-2 subunit gamma) (Laminin-3 subunit gamma) (Laminin-4 subunit gamma) (Laminin-6 subunit gamma) (Laminin-7 subunit gamma) (Laminin-8 subunit gamma) (Laminin-9 subunit gamma) (S-laminin subunit gamma) (S-LAM gamma)
P11047	LAMC1	1241	1000	R.KYEQAKN*ISQDLEK.Q	3.476	-0.01	566.293	3	KYEQAKNISQDLE	1	Laminin subunit gamma-1 (Laminin B2 chain) (Laminin-1 subunit gamma) (Laminin-10 subunit gamma) (Laminin-11 subunit gamma) (Laminin-2 subunit gamma) (Laminin-3 subunit gamma) (Laminin-4 subunit gamma) (Laminin-6 subunit gamma) (Laminin-7 subunit gamma) (Laminin-8 subunit gamma) (Laminin-9 subunit gamma) (S-laminin subunit gamma) (S-LAM gamma)
P11047	LAMC1	1380	17.009	R.RVNDN*KTAAEEALR.K	2.241	-0.59	795.41	2	DRRVNDNKTAAEE	3	Laminin subunit gamma-1 (Laminin B2 chain) (Laminin-1 subunit gamma) (Laminin-10 subunit gamma) (Laminin-11 subunit gamma) (Laminin-2 subunit gamma) (Laminin-3 subunit gamma) (Laminin-4 subunit gamma) (Laminin-6 subunit gamma) (Laminin-7 subunit gamma) (Laminin-8 subunit gamma) (Laminin-9 subunit gamma) (S-laminin subunit gamma) (S-LAM gamma)
P11047	LAMC1	1395	30.07	R.KIPAIN*QTITEANEK.T	2.437	0.79	836.954	2	RKIPAINQTITEA	3	Laminin subunit gamma-1 (Laminin B2 chain) (Laminin-1 subunit gamma) (Laminin-10 subunit gamma) (Laminin-11 subunit gamma) (Laminin-2 subunit gamma) (Laminin-3 subunit gamma) (Laminin-4 subunit gamma) (Laminin-6 subunit gamma) (Laminin-7 subunit gamma) (Laminin-8 subunit gamma) (Laminin-9 subunit gamma) (S-laminin subunit gamma) (S-LAM gamma)
B4DWL3	LAMP1	62	1000	K.SGPKN*MTFDLPSDATVVLN*R.S	2.699	-0.12	723.361	3	TKSGPKNMTFDLP	11	Lysosome-associated membrane glycoprotein 1 (cDNA FLJ57633, highly similar to Lysosome-associated membrane glycoprotein 1)
B4DWL3	LAMP1	76	1000	K.SGPKN*MTFDLPSDATVVLN*R.S	2.699	-0.12	723.361	3	DATVVLNRSSCGK	11	Lysosome-associated membrane glycoprotein 1 (cDNA FLJ57633, highly similar to Lysosome-associated membrane glycoprotein 1)
B4DWL3	LAMP1	84	1000	R.SSCGKEN*TSDPSLVIAFGR.G	3.808	-0.09	676.658	3	SSCGKENTSDPSL	4	Lysosome-associated membrane glycoprotein 1 (cDNA FLJ57633, highly similar to Lysosome-associated membrane glycoprotein 1)
B4DWL3	LAMP1	103	1000	R.GHTLTLN*FTR.N	1.693	-0.08	581.809	2	GHTLTLNFTRNAT	2	Lysosome-associated membrane glycoprotein 1 (cDNA FLJ57633, highly similar to Lysosome-associated membrane glycoprotein 1)
B4DWL3	LAMP1	121	1000	R.YSVQLM^SFVYN*LSDTHLFPN*ASSK.E	2.919	0.52	924.107	3	LMSFVYNLSDTHL	5	Lysosome-associated membrane glycoprotein 1 (cDNA FLJ57633, highly similar to Lysosome-associated membrane glycoprotein 1)
B4DWL3	LAMP1	130	1000	R.YSVQLM^SFVYN*LSDTHLFPN*ASSK.E	2.919	0.52	924.107	3	DTHLFPNASSKET	5	Lysosome-associated membrane glycoprotein 1 (cDNA FLJ57633, highly similar to Lysosome-associated membrane glycoprotein 1)
P11279	LAMP1	165	15.72	R.CVSGTQVHMNN*VTVTLHDATIQAYLSN*SSFSR.G	2.935	-1.61	886.669	4	TQVHMNNVTVTLH	1	Lysosome-associated membrane glycoprotein 1 (LAMP-1) (Lysosome-associated membrane protein 1) (CD107 antigen-like family member A) (CD antigen CD107a)
P11279	LAMP1	181	53.768	R.CVSGTQVHMNN*VTVTLHDATIQAYLSN*SSFSR.G	3.825	0.46	886.671	4	IQAYLSNSSFSRG	4	Lysosome-associated membrane glycoprotein 1 (LAMP-1) (Lysosome-associated membrane protein 1) (CD107 antigen-like family member A) (CD antigen CD107a)
B4DWL3	LAMP1	208	17.009	R.LLNINPN*K.T	2.07	-0.11	464.771	2	LLNINPNKTSASG	1	Lysosome-associated membrane glycoprotein 1 (cDNA FLJ57633, highly similar to Lysosome-associated membrane glycoprotein 1)
B4E2S7	LAMP2	28	18.957	K.TVTISDHGTVTYN*GSICGDDQNGPK.I	3.505	0.29	880.398	3	HGTVTYNGSICGD	38	Lysosome-associated membrane glycoprotein 2 (cDNA FLJ58780, highly similar to Homo sapiens lysosomal-associated membrane protein 2 (LAMP2), transcript variant LAMP2B, mRNA)
P13473	LAMP2	49	1000	K.WQMN*FTVR.Y	1.77	0.21	542.76	2	YAKWQMNFTVRYE	2	Lysosome-associated membrane glycoprotein 2 (LAMP-2) (Lysosome-associated membrane protein 2) (CD107 antigen-like family member B) (CD antigen CD107b)
B4E2S7	LAMP2	54	1000	K.IAVQFGPGFSWIAN*FTK.A	3.55	-0.13	629.329	3	GFSWIANFTKAAS	3	Lysosome-associated membrane glycoprotein 2 (cDNA FLJ58780, highly similar to Homo sapiens lysosomal-associated membrane protein 2 (LAMP2), transcript variant LAMP2B, mRNA)
B4E2S7	LAMP2	182	9.296	K.EKPEAGTYSVNNGN*DTCLLATM^GLQLN*ITQDK.V	3.973	-2.58	880.164	4	YSVNNGNDTCLLA	1	Lysosome-associated membrane glycoprotein 2 (cDNA FLJ58780, highly similar to Homo sapiens lysosomal-associated membrane protein 2 (LAMP2), transcript variant LAMP2B, mRNA)
B4E2S7	LAMP2	195	51.225	K.EKPEAGTYSVNNGN*DTCLLATM^GLQLN*ITQDK.V	3.973	-2.58	880.164	4	TMGLQLNITQDKV	1	Lysosome-associated membrane glycoprotein 2 (cDNA FLJ58780, highly similar to Homo sapiens lysosomal-associated membrane protein 2 (LAMP2), transcript variant LAMP2B, mRNA)
B4E2S7	LAMP2	210	24.732	K.EKPEAGTYSVNNGNDTCLLATM^GLQLN*ITQDKVASVIN*INPN*TTHSTGSCR.S	4.348	0.5	1106.73	5	VININPNTTHSTG	1	Lysosome-associated membrane glycoprotein 2 (cDNA FLJ58780, highly similar to Homo sapiens lysosomal-associated membrane protein 2 (LAMP2), transcript variant LAMP2B, mRNA)
B4E2S7	LAMP2	228	1000	R.SHTALLRLN*SSTIK.Y	2.024	-0.66	386.722	4	TALLRLNSSTIKY	2	Lysosome-associated membrane glycoprotein 2 (cDNA FLJ58780, highly similar to Homo sapiens lysosomal-associated membrane protein 2 (LAMP2), transcript variant LAMP2B, mRNA)
B4E2S7	LAMP2	309	1000	R.VQPFN*VTQGK.Y	1.631	-0.09	560.798	2	LRVQPFNVTQGKY	1	Lysosome-associated membrane glycoprotein 2 (cDNA FLJ58780, highly similar to Homo sapiens lysosomal-associated membrane protein 2 (LAMP2), transcript variant LAMP2B, mRNA)
E7ETP9	LAMP3	242	11.721	R.RYFNIDPN*ATQASGNCGTR.K	3.976	0.54	715.661	3	YFNIDPNATQASG	5	Lysosome-associated membrane glycoprotein 3
H0YMD1	LDLR	657	70.808	R.LTGSDVNLLAENLLSPEDM^VLFHN*LTQPR.G	3.705	1.02	1085.89	3	DMVLFHNLTQPRG	6	Low-density lipoprotein receptor
K7EJD3	LGALS3BP	69	1000	R.ALGFEN*ATQALGR.A	3.901	-0.1	675.848	2	RALGFENATQALG	1	Galectin-3-binding protein
Q08380	LGALS3BP	398	1000	R.YKGLN*LTEDTYKPR.I	2.142	-0.43	425.974	4	ARYKGLNLTEDTY	2	Galectin-3-binding protein (Basement membrane autoantigen p105) (Lectin galactoside-binding soluble 3-binding protein) (Mac-2-binding protein) (MAC2BP) (Mac-2 BP) (Tumor-associated antigen 90K)
Q08380	LGALS3BP	580	1000	R.TVIRPFYLTN*SSGVD.-	2.369	0.1	836.427	2	RPFYLTNSSGVD	1	Galectin-3-binding protein (Basement membrane autoantigen p105) (Lectin galactoside-binding soluble 3-binding protein) (Mac-2-binding protein) (MAC2BP) (Mac-2 BP) (Tumor-associated antigen 90K)
Q86TV2	LGMN	263	1000	K.SHTN*TSHVMQYGN*K.T	2.629	-0.7	537.239	3	LVKSHTNTSHVMQ	1	Full-length cDNA clone CS0DI002YH20 of Placenta of Homo sapiens (human) (Legumain)
Q86TV2	LGMN	272	1000	K.SHTN*TSHVMQYGN*K.T	2.629	-0.7	537.239	3	HVMQYGNKTISTM	1	Full-length cDNA clone CS0DI002YH20 of Placenta of Homo sapiens (human) (Legumain)
Q9BXB1	LGR4	294	2.79	R.TIHLYDNPLSFVGNSAFHN*LSDLHSLVIR.G	2.811	-0.15	821.425	4	GNSAFHNLSDLHS	2	Leucine-rich repeat-containing G-protein coupled receptor 4 (G-protein coupled receptor 48)
Q9BXB1	LGR4	314	1000	R.GASMVQQFPN*LTGTVHLESLTLTGTK.I	2.867	0.33	911.806	3	MVQQFPNLTGTVH	3	Leucine-rich repeat-containing G-protein coupled receptor 4 (G-protein coupled receptor 48)
P42702	LIFR	572	1000	K.ILSYN*VSCSSDEETQSLSEIPDPQHK.A	2.693	0	989.453	3	GKILSYNVSCSSD	1	Leukemia inhibitory factor receptor (LIF receptor) (LIF-R) (CD antigen CD118)
P42702	LIFR	787	1000	K.VKN*ITDISQK.T	2.558	0.36	383.552	3	SDIKVKNITDISQ	2	Leukemia inhibitory factor receptor (LIF receptor) (LIF-R) (CD antigen CD118)
H0YMX3	LINGO1	149	1000	K.LIPLGVFTGLSN*LTK.L	2.398	-0.1	788.466	2	VFTGLSNLTKLDI	2	Leucine-rich repeat and immunoglobulin-like domain-containing nogo receptor-interacting protein 1 (Fragment)
Q96FE5	LINGO1	492	51.463	R.YAQVQDN*GTYLCIAANAGGN*DSM^PAHLHVR.S	3.427	-0.24	817.125	4	YAQVQDNGTYLCI	3	Leucine-rich repeat and immunoglobulin-like domain-containing nogo receptor-interacting protein 1 (Leucine-rich repeat and immunoglobulin domain-containing protein 1) (Leucine-rich repeat neuronal protein 1) (Leucine-rich repeat neuronal protein 6A)
Q96FE5	LINGO1	505	17.512	R.YAQVQDN*GTYLCIAANAGGN*DSM^PAHLHVR.S	3.427	-0.24	817.125	4	AANAGGNDSMPAH	3	Leucine-rich repeat and immunoglobulin-like domain-containing nogo receptor-interacting protein 1 (Leucine-rich repeat and immunoglobulin domain-containing protein 1) (Leucine-rich repeat neuronal protein 1) (Leucine-rich repeat neuronal protein 6A)
P38571	LIPA	321	5.659	K.NYFHYN*QSYPPTYNVK.D	2.363	-0.42	679.979	3	KNYFHYNQSYPPT	3	Lysosomal acid lipase/cholesteryl ester hydrolase (Acid cholesteryl ester hydrolase) (LAL) (EC 3.1.1.13) (Cholesteryl esterase) (Lipase A) (Sterol esterase)
D6RBV2	LMAN2	183	0	R.VFPYISVMVNN*GSLSYDHSK.D	3.244	0.55	1130.55	2	ISVMVNNGSLSYD	7	Vesicular integral-membrane protein VIP36
Q9NUN5	LMBRD1	78	9.34	K.NQN*GTFKDWANAN*VSR.Q	3.888	-0.04	914.423	2	SYMKNQNGTFKDW	3	Probable lysosomal cobalamin transporter (HDAg-L-interacting protein NESI) (LMBR1 domain-containing protein 1) (Nuclear export signal-interacting protein)
Q9NUN5	LMBRD1	88	48.874	K.NQN*GTFKDWANAN*VSR.Q	3.888	-0.04	914.423	2	KDWANANVSRQIE	3	Probable lysosomal cobalamin transporter (HDAg-L-interacting protein NESI) (LMBR1 domain-containing protein 1) (Nuclear export signal-interacting protein)
Q9UIQ6	LNPEP	145	1000	K.EGCHKKN*QSIGLIQPFATN*GK.L	2.727	0.06	584.048	4	EGCHKKNQSIGLI	2	Leucyl-cystinyl aminopeptidase (Cystinyl aminopeptidase) (EC 3.4.11.3) (Insulin-regulated membrane aminopeptidase) (Insulin-responsive aminopeptidase) (IRAP) (Oxytocinase) (OTase) (Placental leucine aminopeptidase) (P-LAP) [Cleaved into: Leucyl-cystinyl aminopeptidase, pregnancy serum form]
Q9UIQ6	LNPEP	157	1000	K.EGCHKKN*QSIGLIQPFATN*GK.L	2.727	0.06	584.048	4	IQPFATNGKLFPW	2	Leucyl-cystinyl aminopeptidase (Cystinyl aminopeptidase) (EC 3.4.11.3) (Insulin-regulated membrane aminopeptidase) (Insulin-responsive aminopeptidase) (IRAP) (Oxytocinase) (OTase) (Placental leucine aminopeptidase) (P-LAP) [Cleaved into: Leucyl-cystinyl aminopeptidase, pregnancy serum form]
Q9UIQ6	LNPEP	578	62.847	K.TYLSEDVFQHAVVLYLHN*HSYASIQSDDLWDSFNEVTN*QTLDVKR.M	4.282	3.4	1061.51	5	VVLYLHNHSYASI	1	Leucyl-cystinyl aminopeptidase (Cystinyl aminopeptidase) (EC 3.4.11.3) (Insulin-regulated membrane aminopeptidase) (Insulin-responsive aminopeptidase) (IRAP) (Oxytocinase) (OTase) (Placental leucine aminopeptidase) (P-LAP) [Cleaved into: Leucyl-cystinyl aminopeptidase, pregnancy serum form]
Q9UIQ6	LNPEP	598	8.463	K.TYLSEDVFQHAVVLYLHN*HSYASIQSDDLWDSFNEVTN*QTLDVKR.M	4.282	3.4	1061.51	5	SFNEVTNQTLDVK	1	Leucyl-cystinyl aminopeptidase (Cystinyl aminopeptidase) (EC 3.4.11.3) (Insulin-regulated membrane aminopeptidase) (Insulin-responsive aminopeptidase) (IRAP) (Oxytocinase) (OTase) (Placental leucine aminopeptidase) (P-LAP) [Cleaved into: Leucyl-cystinyl aminopeptidase, pregnancy serum form]
Q9UIQ6	LNPEP	664	78.451	R.FFLNMKPEIQPSDTSYLWHIPLSYVTEGRN*YSK.Y	4.195	0.19	991.743	4	YVTEGRNYSKYQS	1	Leucyl-cystinyl aminopeptidase (Cystinyl aminopeptidase) (EC 3.4.11.3) (Insulin-regulated membrane aminopeptidase) (Insulin-responsive aminopeptidase) (IRAP) (Oxytocinase) (OTase) (Placental leucine aminopeptidase) (P-LAP) [Cleaved into: Leucyl-cystinyl aminopeptidase, pregnancy serum form]
Q9UIQ6	LNPEP	760	5.085	R.AFDLINYLGNEN*HTAPITEALFQTDLIYNLLEK.L	4.468	2.64	1266.32	3	NYLGNENHTAPIT	1	Leucyl-cystinyl aminopeptidase (Cystinyl aminopeptidase) (EC 3.4.11.3) (Insulin-regulated membrane aminopeptidase) (Insulin-responsive aminopeptidase) (IRAP) (Oxytocinase) (OTase) (Placental leucine aminopeptidase) (P-LAP) [Cleaved into: Leucyl-cystinyl aminopeptidase, pregnancy serum form]
Q9UIQ6	LNPEP	834	7.971	R.SALLEFACTHNLGN*CSTTAMK.L	2.848	-0.7	777.021	3	CTHNLGNCSTTAM	8	Leucyl-cystinyl aminopeptidase (Cystinyl aminopeptidase) (EC 3.4.11.3) (Insulin-regulated membrane aminopeptidase) (Insulin-responsive aminopeptidase) (IRAP) (Oxytocinase) (OTase) (Placental leucine aminopeptidase) (P-LAP) [Cleaved into: Leucyl-cystinyl aminopeptidase, pregnancy serum form]
Q9UIQ6	LNPEP	850	1000	K.LFDDWMASN*GTQSLPTDVMTTVFK.V	3.439	2.52	1354.13	2	DDWMASNGTQSLP	1	Leucyl-cystinyl aminopeptidase (Cystinyl aminopeptidase) (EC 3.4.11.3) (Insulin-regulated membrane aminopeptidase) (Insulin-responsive aminopeptidase) (IRAP) (Oxytocinase) (OTase) (Placental leucine aminopeptidase) (P-LAP) [Cleaved into: Leucyl-cystinyl aminopeptidase, pregnancy serum form]
P28300	LOX	81	1000	R.RRDPGAAVPGAAN*ASAQQPR.T	3.999	1.96	665.013	3	AVPGAANASAQQP	1	Protein-lysine 6-oxidase (EC 1.4.3.13) (Lysyl oxidase)
B1ALU1	LPHN2	656	1000	R.SLGQFLSTEN*ATIK.L	2.747	-0.54	756.395	2	QFLSTENATIKLG	2	Latrophilin-2
B1ALU1	LPHN2	669	26.927	R.N*STIAVNSHVISVSINK.E	3.256	-0.31	893.483	2	ADFIGRNSTIAVN	2	Latrophilin-2
B1ALU1	LPHN2	712	6.454	R.VYLTDPVLFTLPHIDPDNYFNAN*CSFWN*YSER.T	5.282	-2.87	1305.26	3	DNYFNANCSFWNY	1	Latrophilin-2
B1ALU1	LPHN2	717	15.59	R.VYLTDPVLFTLPHIDPDNYFNAN*CSFWN*YSER.T	3.507	0.43	1305.27	3	ANCSFWNYSERTM	5	Latrophilin-2
E7EMR3	LPHN3	608	1000	R.AMDQLVGLLDVQLRN*LTPGGK.D	2.483	0.05	747.743	3	LDVQLRNLTPGGK	1	Latrophilin-3
E7EMR3	LPHN3	759	43.066	R.VAFVLYNNLGPYLSTEN*ASMK.L	3.877	0.14	1167.58	2	PYLSTENASMKLG	2	Latrophilin-3
E7EMR3	LPHN3	772	26.105	K.LGTEALSTN*HSVIVNSPVITAAINK.E	3.891	-0.18	851.465	3	TEALSTNHSVIVN	5	Latrophilin-3
Q07954	LRP1	114	1000	R.ELQGN*CSR.L	1.631	-0.44	483.713	2	CRELQGNCSRLGC	1	Prolow-density lipoprotein receptor-related protein 1 (LRP-1) (Alpha-2-macroglobulin receptor) (A2MR) (Apolipoprotein E receptor) (APOER) (CD antigen CD91) [Cleaved into: Low-density lipoprotein receptor-related protein 1 85 kDa subunit (LRP-85); Low-density lipoprotein receptor-related protein 1 515 kDa subunit (LRP-515); Low-density lipoprotein receptor-related protein 1 intracellular domain (L…
Q07954	LRP1	136	1000	R.LGCQHHCVPTLDGPTCYCN*SSFQLQADGK.T	3.111	-0.16	839.114	4	GPTCYCNSSFQLQ	8	Prolow-density lipoprotein receptor-related protein 1 (LRP-1) (Alpha-2-macroglobulin receptor) (A2MR) (Apolipoprotein E receptor) (APOER) (CD antigen CD91) [Cleaved into: Low-density lipoprotein receptor-related protein 1 85 kDa subunit (LRP-85); Low-density lipoprotein receptor-related protein 1 515 kDa subunit (LRP-515); Low-density lipoprotein receptor-related protein 1 intracellular domain (L…
Q07954	LRP1	239	1000	R.QTTAM^DFSYAN*ETVCWVHVGDSAAQTQLK.C	3.643	0.07	1093.16	3	MDFSYANETVCWV	2	Prolow-density lipoprotein receptor-related protein 1 (LRP-1) (Alpha-2-macroglobulin receptor) (A2MR) (Apolipoprotein E receptor) (APOER) (CD antigen CD91) [Cleaved into: Low-density lipoprotein receptor-related protein 1 85 kDa subunit (LRP-85); Low-density lipoprotein receptor-related protein 1 515 kDa subunit (LRP-515); Low-density lipoprotein receptor-related protein 1 intracellular domain (L…
Q07954	LRP1	446	0	R.VNRFN*STEYQVVTR.V	3.43	0.74	572.625	3	IRVNRFNSTEYQV	3	Prolow-density lipoprotein receptor-related protein 1 (LRP-1) (Alpha-2-macroglobulin receptor) (A2MR) (Apolipoprotein E receptor) (APOER) (CD antigen CD91) [Cleaved into: Low-density lipoprotein receptor-related protein 1 85 kDa subunit (LRP-85); Low-density lipoprotein receptor-related protein 1 515 kDa subunit (LRP-515); Low-density lipoprotein receptor-related protein 1 intracellular domain (L…
Q07954	LRP1	729	1000	R.IETILLN*GTDRK.I	2.34	0.35	459.261	3	IETILLNGTDRKI	2	Prolow-density lipoprotein receptor-related protein 1 (LRP-1) (Alpha-2-macroglobulin receptor) (A2MR) (Apolipoprotein E receptor) (APOER) (CD antigen CD91) [Cleaved into: Low-density lipoprotein receptor-related protein 1 85 kDa subunit (LRP-85); Low-density lipoprotein receptor-related protein 1 515 kDa subunit (LRP-515); Low-density lipoprotein receptor-related protein 1 intracellular domain (L…
Q07954	LRP1	1511	1000	K.WTGHN*VTVVQR.T	3.204	-0.4	650.338	2	NKWTGHNVTVVQR	2	Prolow-density lipoprotein receptor-related protein 1 (LRP-1) (Alpha-2-macroglobulin receptor) (A2MR) (Apolipoprotein E receptor) (APOER) (CD antigen CD91) [Cleaved into: Low-density lipoprotein receptor-related protein 1 85 kDa subunit (LRP-85); Low-density lipoprotein receptor-related protein 1 515 kDa subunit (LRP-515); Low-density lipoprotein receptor-related protein 1 intracellular domain (L…
Q07954	LRP1	1558	17.009	R.QPM^APNPCEANGGQGPCSHLCLINYN*R.T	2.854	-0.22	1025.45	3	LCLINYNRTVSCA	2	Prolow-density lipoprotein receptor-related protein 1 (LRP-1) (Alpha-2-macroglobulin receptor) (A2MR) (Apolipoprotein E receptor) (APOER) (CD antigen CD91) [Cleaved into: Low-density lipoprotein receptor-related protein 1 85 kDa subunit (LRP-85); Low-density lipoprotein receptor-related protein 1 515 kDa subunit (LRP-515); Low-density lipoprotein receptor-related protein 1 intracellular domain (L…
Q07954	LRP1	1575	1000	K.DN*TTCYEFKK.F	2.538	-0.47	654.786	2	MKLHKDNTTCYEF	4	Prolow-density lipoprotein receptor-related protein 1 (LRP-1) (Alpha-2-macroglobulin receptor) (A2MR) (Apolipoprotein E receptor) (APOER) (CD antigen CD91) [Cleaved into: Low-density lipoprotein receptor-related protein 1 85 kDa subunit (LRP-85); Low-density lipoprotein receptor-related protein 1 515 kDa subunit (LRP-515); Low-density lipoprotein receptor-related protein 1 intracellular domain (L…
Q07954	LRP1	1763	76.733	K.LYWISSGN*HTINR.C	2.916	-0.25	782.393	2	YWISSGNHTINRC	1	Prolow-density lipoprotein receptor-related protein 1 (LRP-1) (Alpha-2-macroglobulin receptor) (A2MR) (Apolipoprotein E receptor) (APOER) (CD antigen CD91) [Cleaved into: Low-density lipoprotein receptor-related protein 1 85 kDa subunit (LRP-85); Low-density lipoprotein receptor-related protein 1 515 kDa subunit (LRP-515); Low-density lipoprotein receptor-related protein 1 intracellular domain (L…
Q07954	LRP1	2127	1000	R.GSKDN*ATDSVPLR.T	2.662	0.09	454.896	3	KRGSKDNATDSVP	3	Prolow-density lipoprotein receptor-related protein 1 (LRP-1) (Alpha-2-macroglobulin receptor) (A2MR) (Apolipoprotein E receptor) (APOER) (CD antigen CD91) [Cleaved into: Low-density lipoprotein receptor-related protein 1 85 kDa subunit (LRP-85); Low-density lipoprotein receptor-related protein 1 515 kDa subunit (LRP-515); Low-density lipoprotein receptor-related protein 1 intracellular domain (L…
Q07954	LRP1	2472	15.007	R.VDIPQQPMGIIAVAN*DTNSCELSPCR.I	3.577	1.64	963.456	3	GIIAVANDTNSCE	2	Prolow-density lipoprotein receptor-related protein 1 (LRP-1) (Alpha-2-macroglobulin receptor) (A2MR) (Apolipoprotein E receptor) (APOER) (CD antigen CD91) [Cleaved into: Low-density lipoprotein receptor-related protein 1 85 kDa subunit (LRP-85); Low-density lipoprotein receptor-related protein 1 515 kDa subunit (LRP-515); Low-density lipoprotein receptor-related protein 1 intracellular domain (L…
Q07954	LRP1	2502	155.989	R.INNGGCQDLCLLTHQGHVN*CSCR.G	4.107	-0.41	906.061	3	THQGHVNCSCRGG	1	Prolow-density lipoprotein receptor-related protein 1 (LRP-1) (Alpha-2-macroglobulin receptor) (A2MR) (Apolipoprotein E receptor) (APOER) (CD antigen CD91) [Cleaved into: Low-density lipoprotein receptor-related protein 1 85 kDa subunit (LRP-85); Low-density lipoprotein receptor-related protein 1 515 kDa subunit (LRP-515); Low-density lipoprotein receptor-related protein 1 intracellular domain (L…
Q07954	LRP1	2815	7.462	R.WLCDGDKDCADGADESIAAGCLYN*STCDDREFMCQNR.Q	4.213	0.17	1095.43	4	AAGCLYNSTCDDR	1	Prolow-density lipoprotein receptor-related protein 1 (LRP-1) (Alpha-2-macroglobulin receptor) (A2MR) (Apolipoprotein E receptor) (APOER) (CD antigen CD91) [Cleaved into: Low-density lipoprotein receptor-related protein 1 85 kDa subunit (LRP-85); Low-density lipoprotein receptor-related protein 1 515 kDa subunit (LRP-515); Low-density lipoprotein receptor-related protein 1 intracellular domain (L…
Q07954	LRP1	2905	1000	K.CN*ASSQFLCSSGR.C	3.324	-1.82	738.807	2	SQEHKCNASSQFL	3	Prolow-density lipoprotein receptor-related protein 1 (LRP-1) (Alpha-2-macroglobulin receptor) (A2MR) (Apolipoprotein E receptor) (APOER) (CD antigen CD91) [Cleaved into: Low-density lipoprotein receptor-related protein 1 85 kDa subunit (LRP-85); Low-density lipoprotein receptor-related protein 1 515 kDa subunit (LRP-515); Low-density lipoprotein receptor-related protein 1 intracellular domain (L…
Q07954	LRP1	3048	30.612	R.KLNLDGSN*YTLLK.Q	2.597	0.36	494.608	3	LNLDGSNYTLLKQ	2	Prolow-density lipoprotein receptor-related protein 1 (LRP-1) (Alpha-2-macroglobulin receptor) (A2MR) (Apolipoprotein E receptor) (APOER) (CD antigen CD91) [Cleaved into: Low-density lipoprotein receptor-related protein 1 85 kDa subunit (LRP-85); Low-density lipoprotein receptor-related protein 1 515 kDa subunit (LRP-515); Low-density lipoprotein receptor-related protein 1 intracellular domain (L…
Q07954	LRP1	3089	2.806	R.M^HLN*GSNVQVLHR.T	3.741	-0.56	508.592	3	IRRMHLNGSNVQV	3	Prolow-density lipoprotein receptor-related protein 1 (LRP-1) (Alpha-2-macroglobulin receptor) (A2MR) (Apolipoprotein E receptor) (APOER) (CD antigen CD91) [Cleaved into: Low-density lipoprotein receptor-related protein 1 85 kDa subunit (LRP-85); Low-density lipoprotein receptor-related protein 1 515 kDa subunit (LRP-515); Low-density lipoprotein receptor-related protein 1 intracellular domain (L…
Q07954	LRP1	3333	71.949	R.TCVSN*CTASQFVCKNDK.C	4.063	0.89	1011.44	2	GRTCVSNCTASQF	3	Prolow-density lipoprotein receptor-related protein 1 (LRP-1) (Alpha-2-macroglobulin receptor) (A2MR) (Apolipoprotein E receptor) (APOER) (CD antigen CD91) [Cleaved into: Low-density lipoprotein receptor-related protein 1 85 kDa subunit (LRP-85); Low-density lipoprotein receptor-related protein 1 515 kDa subunit (LRP-515); Low-density lipoprotein receptor-related protein 1 intracellular domain (L…
Q07954	LRP1	3662	0	R.TCPLDEFQCN*NTLCKPLAWK.C	2.939	2	1249.58	2	LDEFQCNNTLCKP	2	Prolow-density lipoprotein receptor-related protein 1 (LRP-1) (Alpha-2-macroglobulin receptor) (A2MR) (Apolipoprotein E receptor) (APOER) (CD antigen CD91) [Cleaved into: Low-density lipoprotein receptor-related protein 1 85 kDa subunit (LRP-85); Low-density lipoprotein receptor-related protein 1 515 kDa subunit (LRP-515); Low-density lipoprotein receptor-related protein 1 intracellular domain (L…
Q07954	LRP1	3788	1000	K.LTSCATN*ASICGDEAR.C	4.525	-0.08	864.874	2	LTSCATNASICGD	2	Prolow-density lipoprotein receptor-related protein 1 (LRP-1) (Alpha-2-macroglobulin receptor) (A2MR) (Apolipoprotein E receptor) (APOER) (CD antigen CD91) [Cleaved into: Low-density lipoprotein receptor-related protein 1 85 kDa subunit (LRP-85); Low-density lipoprotein receptor-related protein 1 515 kDa subunit (LRP-515); Low-density lipoprotein receptor-related protein 1 intracellular domain (L…
Q07954	LRP1	3839	24.437	R.FGTCSQLCN*NTK.G	2.874	-1.17	716.807	2	TCSQLCNNTKGGH	1	Prolow-density lipoprotein receptor-related protein 1 (LRP-1) (Alpha-2-macroglobulin receptor) (A2MR) (Apolipoprotein E receptor) (APOER) (CD antigen CD91) [Cleaved into: Low-density lipoprotein receptor-related protein 1 85 kDa subunit (LRP-85); Low-density lipoprotein receptor-related protein 1 515 kDa subunit (LRP-515); Low-density lipoprotein receptor-related protein 1 intracellular domain (L…
Q07954	LRP1	3858	73.448	K.THN*TCKAEGSEYQVLYIADDNEIR.S	3.035	0.01	708.078	4	NFMKTHNTCKAEG	2	Prolow-density lipoprotein receptor-related protein 1 (LRP-1) (Alpha-2-macroglobulin receptor) (A2MR) (Apolipoprotein E receptor) (APOER) (CD antigen CD91) [Cleaved into: Low-density lipoprotein receptor-related protein 1 85 kDa subunit (LRP-85); Low-density lipoprotein receptor-related protein 1 515 kDa subunit (LRP-515); Low-density lipoprotein receptor-related protein 1 intracellular domain (L…
Q07954	LRP1	4075	1000	R.LN*GTDPIVAADSKR.G	2.188	0.07	487.259	3	IGSIRLNGTDPIV	2	Prolow-density lipoprotein receptor-related protein 1 (LRP-1) (Alpha-2-macroglobulin receptor) (A2MR) (Apolipoprotein E receptor) (APOER) (CD antigen CD91) [Cleaved into: Low-density lipoprotein receptor-related protein 1 85 kDa subunit (LRP-85); Low-density lipoprotein receptor-related protein 1 515 kDa subunit (LRP-515); Low-density lipoprotein receptor-related protein 1 intracellular domain (L…
Q07954	LRP1	4125	1000	K.FGHSPLVN*LTGGLSHASDVVLYHQHK.Q	2.526	0.57	939.484	3	GHSPLVNLTGGLS	3	Prolow-density lipoprotein receptor-related protein 1 (LRP-1) (Alpha-2-macroglobulin receptor) (A2MR) (Apolipoprotein E receptor) (APOER) (CD antigen CD91) [Cleaved into: Low-density lipoprotein receptor-related protein 1 85 kDa subunit (LRP-85); Low-density lipoprotein receptor-related protein 1 515 kDa subunit (LRP-515); Low-density lipoprotein receptor-related protein 1 intracellular domain (L…
Q07954	LRP1	4278	0	K.CTQQVCAGYCAN*NSTCTVNQGNQPQCR.C	3.404	0.12	1060.43	3	CAGYCANNSTCTV	2	Prolow-density lipoprotein receptor-related protein 1 (LRP-1) (Alpha-2-macroglobulin receptor) (A2MR) (Apolipoprotein E receptor) (APOER) (CD antigen CD91) [Cleaved into: Low-density lipoprotein receptor-related protein 1 85 kDa subunit (LRP-85); Low-density lipoprotein receptor-related protein 1 515 kDa subunit (LRP-515); Low-density lipoprotein receptor-related protein 1 intracellular domain (L…
Q07954	LRP1	4279	6.591	K.CTQQVCAGYCANN*STCTVNQGNQPQCR.C	3.869	1.17	1060.43	3	AGYCANNSTCTVN	3	Prolow-density lipoprotein receptor-related protein 1 (LRP-1) (Alpha-2-macroglobulin receptor) (A2MR) (Apolipoprotein E receptor) (APOER) (CD antigen CD91) [Cleaved into: Low-density lipoprotein receptor-related protein 1 85 kDa subunit (LRP-85); Low-density lipoprotein receptor-related protein 1 515 kDa subunit (LRP-515); Low-density lipoprotein receptor-related protein 1 intracellular domain (L…
Q5VYB9	LRP11	164	1000	R.RPAPPAAVLGCYLFN*CTAR.G	4.479	0.7	713.024	3	LGCYLFNCTARGR	1	Low-density lipoprotein receptor-related protein 11
P98164	LRP2	1496	1000	K.TWSAFQN*GTDR.R	2.092	0.54	643.289	2	TWSAFQNGTDRRV	1	Low-density lipoprotein receptor-related protein 2 (LRP-2) (Glycoprotein 330) (gp330) (Megalin)
P98164	LRP2	2781	23.012	R.DCN*ATTEFMCNNRR.C	1.581	-0.78	597.907	3	CLFRDCNATTEFM	1	Low-density lipoprotein receptor-related protein 2 (LRP-2) (Glycoprotein 330) (gp330) (Megalin)
P98164	LRP2	2810	0	R.EFICNGVDNCHDNN*TSDEKNCPDR.T	3.21	0.7	729.04	4	DNCHDNNTSDEKN	2	Low-density lipoprotein receptor-related protein 2 (LRP-2) (Glycoprotein 330) (gp330) (Megalin)
P98164	LRP2	2947	14.062	R.HQCQNQN*CSDSEFLCVNDRPPDRR.C	2.405	0.35	607.862	5	HQCQNQNCSDSEF	3	Low-density lipoprotein receptor-related protein 2 (LRP-2) (Glycoprotein 330) (gp330) (Megalin)
P98164	LRP2	3315	6.591	R.MLAQHCVDAN*NTFCFDNPR.G	3.006	0.46	771.663	3	QHCVDANNTFCFD	6	Low-density lipoprotein receptor-related protein 2 (LRP-2) (Glycoprotein 330) (gp330) (Megalin)
P98164	LRP2	3446	1000	R.QTLVN*TTHRPFDIHVYHPYR.Q	2.12	-0.33	417.05	6	NRQTLVNTTHRPF	1	Low-density lipoprotein receptor-related protein 2 (LRP-2) (Glycoprotein 330) (gp330) (Megalin)
P98164	LRP2	3564	0.645	R.LGQFQCSDGN*CTSPQTLCNAHQNCPDGSDEDRLLCENHHCDSNEWQCANKR.C	3.999	0.1	1021.42	6	FQCSDGNCTSPQT	1	Low-density lipoprotein receptor-related protein 2 (LRP-2) (Glycoprotein 330) (gp330) (Megalin)
O75074	LRP3	359	1000	R.SAGHGFN*ATYQVK.G	3.074	-0.8	691.832	2	SAGHGFNATYQVK	2	Low-density lipoprotein receptor-related protein 3 (LRP-3) (105 kDa low-density lipoprotein receptor-related protein) (hLRp105)
O75096	LRP4	498	13.38	R.ANLN*GSNVEEVVSTGLESPGGLAVDWVHDK.L	3.665	0.72	1032.84	3	ILRANLNGSNVEE	2	Low-density lipoprotein receptor-related protein 4 (LRP-4) (Multiple epidermal growth factor-like domains 7)
O75096	LRP4	1415	2.806	R.RADLN*GSNMETVIGR.G	2.872	-0.12	545.938	3	IRRADLNGSNMET	1	Low-density lipoprotein receptor-related protein 4 (LRP-4) (Multiple epidermal growth factor-like domains 7)
O75096	LRP4	1467	24.437	K.VLIN*NSLDEPR.A	2.724	-0.58	636.837	2	CRKVLINNSLDEP	2	Low-density lipoprotein receptor-related protein 4 (LRP-4) (Multiple epidermal growth factor-like domains 7)
E9PP15	LRP8	71	1000	K.HIYWTDSGN*KTISVATVDGGR.R	3.174	1.22	760.71	3	YWTDSGNKTISVA	1	Low-density lipoprotein receptor-related protein 8
P30533	LRPAP1	268	1000	R.VIDLWDLAQSAN*LTDKELEAFREELK.H	3.41	0.3	1017.19	3	DLAQSANLTDKEL	1	Alpha-2-macroglobulin receptor-associated protein (Alpha-2-MRAP) (Low density lipoprotein receptor-related protein-associated protein 1) (RAP)
Q9NT99	LRRC4B	333	1000	K.ETVPSN*TTCCAR.C	2.72	0.5	699.798	2	KETVPSNTTCCAR	1	Leucine-rich repeat-containing protein 4B (Netrin-G3 ligand) (NGL-3)
Q9NT99	LRRC4B	400	30.612	R.TGTSMTSVNWLTPN*GTLMTHGSYR.V	2.309	0.64	872.409	3	VNWLTPNGTLMTH	1	Leucine-rich repeat-containing protein 4B (Netrin-G3 ligand) (NGL-3)
Q8IWT6	LRRC8A	83	1000	R.GWAAPGPEPTYPN*STILPTPDTGPTGIK.Y	3.474	0.04	946.808	3	PEPTYPNSTILPT	3	Leucine-rich repeat-containing protein 8A
C9JGJ7	LRRC8B	78	44.278	K.ASMN*TSSNPGTPLPLPLR.I	3.201	1.06	928.478	2	ILKASMNTSSNPG	2	Leucine-rich repeat-containing protein 8B (Fragment)
M0QZ48	LRRC8E	63	4.16	K.IICLPNHELQEN*LSEAPCQQLLPR.G	3.13	0.15	959.149	3	NHELQENLSEAPC	2	Leucine-rich repeat-containing protein 8E (Fragment)
B8ZZ84	LRRTM4	59	1000	K.IVYCESHAFADIPEN*ISGGSQGLSLR.F	3.799	-0.36	941.788	3	FADIPENISGGSQ	2	Leucine-rich repeat transmembrane neuronal protein 4
F5H5G1	LSAMP	276	33.968	K.STEGQSSLTVTN*VTEEHYGN*YTCVAANK.L	4.255	0.96	1022.79	3	SSLTVTNVTEEHY	1	Limbic system-associated membrane protein
F5H5G1	LSAMP	284	27.121	K.STEGQSSLTVTN*VTEEHYGN*YTCVAANK.L	4.255	0.96	1022.79	3	TEEHYGNYTCVAA	1	Limbic system-associated membrane protein
Q13449	LSAMP	300	1000	K.LGVTN*ASLVLFRPGSVR.G	2.144	0.23	597.012	3	NKLGVTNASLVLF	1	Limbic system-associated membrane protein (LSAMP) (IgLON family member 3)
H3BVG6	LTK	62	1000	R.HLN*CSHCPLR.D	3.069	-0.12	432.866	3	EIRRHLNCSHCPL	1	Tyrosine-protein kinase receptor (EC 2.7.10.1)
H0YGE9	M6PR	53	8.463	R.LN*ETHIFN*GSNWIMLIYK.G	2.158	0.07	733.702	3	TVVGRLNETHIFN	1	Cation-dependent mannose-6-phosphate receptor (Fragment)
H0YGE9	M6PR	59	7.971	R.LN*ETHIFN*GSNWIMLIYK.G	2.663	1	733.703	3	NETHIFNGSNWIM	9	Cation-dependent mannose-6-phosphate receptor (Fragment)
F5GXU0	M6PR	83	60.641	R.EAGN*HTSGAGLVQINK.S	2.298	0.26	533.606	3	VCREAGNHTSGAG	3	Cation-dependent mannose-6-phosphate receptor (Fragment)
Q16706	MAN2A1	1125	6.454	K.FIVESLTPSSLSLMHSPPGTQN*ISEINLSPMEISTFR.I	4.672	0.31	1355.01	3	SPPGTQNISEINL	3	Alpha-mannosidase 2 (EC 3.2.1.114) (Golgi alpha-mannosidase II) (AMan II) (Man II) (Mannosidase alpha class 2A member 1) (Mannosyl-oligosaccharide 1,3-1,6-alpha-mannosidase)
B4DEU9	MAN2A2	601	48.315	K.NLGFN*CTTSQGK.V	2.866	-0.22	665.303	2	AKNLGFNCTTSQG	3	Alpha-mannosidase 2x (cDNA FLJ50120, highly similar to Homo sapiens mannosidase, alpha, class 2A, member 2 (MAN2A2), mRNA)
O00754	MAN2B1	645	46.971	R.QTFFWYN*ASIGDN*ESDQASGAYIFRPNQQKPLPVSR.W	3.325	-0.76	1035.25	4	QTFFWYNASIGDN	1	Lysosomal alpha-mannosidase (Laman) (EC 3.2.1.24) (Lysosomal acid alpha-mannosidase) (Mannosidase alpha class 2B member 1) (Mannosidase alpha-B) [Cleaved into: Lysosomal alpha-mannosidase A peptide; Lysosomal alpha-mannosidase B peptide; Lysosomal alpha-mannosidase C peptide; Lysosomal alpha-mannosidase D peptide; Lysosomal alpha-mannosidase E peptide]
O00754	MAN2B1	651	37.438	R.QTFFWYN*ASIGDN*ESDQASGAYIFRPNQQKPLPVSR.W	3.325	-0.76	1035.25	4	NASIGDNESDQAS	1	Lysosomal alpha-mannosidase (Laman) (EC 3.2.1.24) (Lysosomal acid alpha-mannosidase) (Mannosidase alpha class 2B member 1) (Mannosidase alpha-B) [Cleaved into: Lysosomal alpha-mannosidase A peptide; Lysosomal alpha-mannosidase B peptide; Lysosomal alpha-mannosidase C peptide; Lysosomal alpha-mannosidase D peptide; Lysosomal alpha-mannosidase E peptide]
O00754	MAN2B1	766	104.034	K.LN*QTEPVAGNYYPVNTR.I	4.357	-0.03	969.976	2	RPTWKLNQTEPVA	2	Lysosomal alpha-mannosidase (Laman) (EC 3.2.1.24) (Lysosomal acid alpha-mannosidase) (Mannosidase alpha class 2B member 1) (Mannosidase alpha-B) [Cleaved into: Lysosomal alpha-mannosidase A peptide; Lysosomal alpha-mannosidase B peptide; Lysosomal alpha-mannosidase C peptide; Lysosomal alpha-mannosidase D peptide; Lysosomal alpha-mannosidase E peptide]
E9PCD7	MAN2B2	465	1000	R.VTDEAGHPVPSQIQN*STETPSAYDLLILTTIPGLSYR.H	3.312	-4.14	1329.67	3	VPSQIQNSTETPS	3	Epididymis-specific alpha-mannosidase
E9PCD7	MAN2B2	619	1000	R.N*MTAQN*YTYAIR.S	2.442	1.02	726.335	2	RQYFYRNMTAQNY	1	Epididymis-specific alpha-mannosidase
E9PCD7	MAN2B2	624	1000	R.N*MTAQN*YTYAIR.S	2.442	1.02	726.335	2	RNMTAQNYTYAIR	1	Epididymis-specific alpha-mannosidase
E9PCD7	MAN2B2	697	24.437	R.RPYVSYVN*NSIAR.N	2.565	0.69	771.402	2	PYVSYVNNSIARN	2	Epididymis-specific alpha-mannosidase
Q14703	MBTPS1	939	34.089	R.LSWAKPQPLN*ETAPSNLWK.H	2.172	0.58	728.385	3	AKPQPLNETAPSN	3	Membrane-bound transcription factor site-1 protease (EC 3.4.21.112) (Endopeptidase S1P) (Subtilisin/kexin-isozyme 1) (SKI-1)
O43462	MBTPS2	337	0	R.LDGSTECCNN*HSLTDVCFSYR.N	1.882	1.18	846.68	3	STECCNNHSLTDV	9	Membrane-bound transcription factor site-2 protease (EC 3.4.24.85) (Endopeptidase S2P) (Sterol regulatory element-binding proteins intramembrane protease) (SREBPs intramembrane protease)
P43121	MCAM	56	1000	K.CGLSQSQGN*LSHVDWFSVHK.E	2.394	-0.06	573.02	4	LSQSQGNLSHVDW	4	Cell surface glycoprotein MUC18 (Cell surface glycoprotein P1H12) (Melanoma cell adhesion molecule) (Melanoma-associated antigen A32) (Melanoma-associated antigen MUC18) (S-endo 1 endothelial-associated antigen) (CD antigen CD146)
P43121	MCAM	449	10.195	K.ENMVLN*LSCEASGHPRPTISWNVN*GTASEQDQDPQR.V	3.956	0.12	1011.71	4	KENMVLNLSCEAS	1	Cell surface glycoprotein MUC18 (Cell surface glycoprotein P1H12) (Melanoma cell adhesion molecule) (Melanoma-associated antigen A32) (Melanoma-associated antigen MUC18) (S-endo 1 endothelial-associated antigen) (CD antigen CD146)
P43121	MCAM	467	14.191	K.ENMVLN*LSCEASGHPRPTISWNVN*GTASEQDQDPQR.V	3.956	0.12	1011.71	4	TISWNVNGTASEQ	1	Cell surface glycoprotein MUC18 (Cell surface glycoprotein P1H12) (Melanoma cell adhesion molecule) (Melanoma-associated antigen A32) (Melanoma-associated antigen MUC18) (S-endo 1 endothelial-associated antigen) (CD antigen CD146)
M0QXD0	MCOLN1	159	1000	R.GGGDPWTN*GSGLALCQR.Y	3.704	-0.19	874.899	2	GGDPWTNGSGLAL	2	Mucolipin-1 (Fragment)
Q7Z7M0	MEGF8	1271	1000	R.ALLTN*VSSVALGSR.R	2.557	-0.31	695.893	2	GRALLTNVSSVAL	1	Multiple epidermal growth factor-like domains protein 8 (Multiple EGF-like domains protein 8) (Epidermal growth factor-like protein 4) (EGF-like protein 4)
C9J1K8	MEGF9	255	1000	R.CN*QTTGQCECRPGYQGLHCETCK.E	2.284	-0.25	712.537	4	LNVNRCNQTTGQC	4	Multiple epidermal growth factor-like domains protein 9
C9J1K8	MEGF9	342	9.34	K.NGCLPCQCNN*R.S	1.373	-2.07	698.275	2	LPCQCNNRSASCD	1	Multiple epidermal growth factor-like domains protein 9
E9PHX8	MERTK	39	5.085	R.NTAFN*LTCQAVGPPEPVNIFWVQN*SSR.V	4.554	1.38	1018.16	3	TRNTAFNLTCQAV	2	Tyrosine-protein kinase Mer
E9PHX8	MERTK	58	43.066	R.NTAFN*LTCQAVGPPEPVNIFWVQN*SSR.V	4.554	1.38	1018.16	3	NIFWVQNSSRVNE	2	Tyrosine-protein kinase Mer
E9PHX8	MERTK	118	1000	R.N*STAHSILISWVPGFDGYSPFR.N	4.617	4.52	1227.61	2	TEVSIRNSTAHSI	1	Tyrosine-protein kinase Mer
E9PHX8	MERTK	153	1000	K.EADPLSN*GSVM^IFN*TSALPHLYQIK.Q	2.84	-0.35	923.126	3	EADPLSNGSVMIF	2	Tyrosine-protein kinase Mer
E9PHX8	MERTK	160	1000	K.EADPLSN*GSVM^IFN*TSALPHLYQIK.Q	2.84	-0.35	923.126	3	GSVMIFNTSALPH	2	Tyrosine-protein kinase Mer
E9PHX8	MERTK	266	1000	K.ELLEEVGQN*GSR.A	3.336	0.38	667.328	2	LEEVGQNGSRARI	1	Tyrosine-protein kinase Mer
E9PHX8	MERTK	278	1000	R.ISVQVHN*ATCTVR.I	2.319	0.12	496.589	3	ISVQVHNATCTVR	3	Tyrosine-protein kinase Mer
P08581	MET	45	10.752	R.MVINVHEAGRN*FTVACQHR.S	3.575	-0.11	748.033	3	MKYQLPNFTAETP	1	Hepatocyte growth factor receptor (HGF receptor) (EC 2.7.10.1) (HGF/SF receptor) (Proto-oncogene c-Met) (Scatter factor receptor) (SF receptor) (Tyrosine-protein kinase Met)
P08581	MET	149	1000	R.HVFPHN*HTADIQSEVHCIFSPQIEEPSQCPDCVVSALGAK.V	4.853	3.25	1136.78	4	RHVFPHNHTADIQ	1	Hepatocyte growth factor receptor (HGF receptor) (EC 2.7.10.1) (HGF/SF receptor) (Proto-oncogene c-Met) (Scatter factor receptor) (SF receptor) (Tyrosine-protein kinase Met)
P08581	MET	399	1000	R.CLQHFYGPN*HEHCFN*R.T	3.445	0.24	531.225	4	NHEHCFNRTLLRN	1	Hepatocyte growth factor receptor (HGF receptor) (EC 2.7.10.1) (HGF/SF receptor) (Proto-oncogene c-Met) (Scatter factor receptor) (SF receptor) (Tyrosine-protein kinase Met)
P08581	MET	607	50.46	R.VLLGN*ESCTLTLSESTMNTLK.C	3.081	0.24	772.052	3	TRVLLGNESCTLT	3	Hepatocyte growth factor receptor (HGF receptor) (EC 2.7.10.1) (HGF/SF receptor) (Proto-oncogene c-Met) (Scatter factor receptor) (SF receptor) (Tyrosine-protein kinase Met)
D6RDM6	MFAP3L	67	10.095	K.EGNSALIN*CSVYGIPDPQFK.W	3.229	1.58	1106.53	2	GNSALINCSVYGI	2	Microfibrillar-associated protein 3-like (Fragment)
O75121	MFAP3L	111	1000	K.WQMHDSGLLN*ITK.V	2.781	-0.18	515.925	3	HDSGLLNITKVSF	1	Microfibrillar-associated protein 3-like (Testis development protein NYD-SP9)
F5GZN3	MFGE8	194	5.75	R.FELLGCELNGCANPLGLKN*NSIPDKQITASSSYK.T	3.778	0.88	936.215	4	NPLGLKNNSIPDK	2	Lactadherin short form
C9JVN1	MFI2	38	1000	R.WCATSDPEQHKCGN*MSEAFR.E	2.574	-0.1	604.252	4	EQHKCGNMSEAFR	1	Melanotransferrin (Fragment)
F5H391	MFSD4	203	1000	R.VLGQHHVDAKPWSN*QTFPGLTPK.D	3.106	0.3	640.835	4	DAKPWSNQTFPGL	2	Major facilitator superfamily domain-containing protein 4
E5RFL0	MGAT4B	118	1000	R.LKPWN*GSHR.H	2.144	-0.17	366.529	3	PRLKPWNGSHRHV	1	Alpha-1,3-mannosyl-glycoprotein 4-beta-N-acetylglucosaminyltransferase B
H0YB84	MGAT4B	290	19.843	R.SGNIEHPEDKLFN*TSVEVLPFDNPQSDKEALQEGR.T	4.624	0.67	986.478	4	PEDKLFNTSVEVL	3	Alpha-1,3-mannosyl-glycoprotein 4-beta-N-acetylglucosaminyltransferase B (Fragment)
Q09328	MGAT5	447	1000	K.RQN*QSLVYGK.V	2.582	6.8	598.323	2	NEIKRQNQSLVYG	2	Alpha-1,6-mannosylglycoprotein 6-beta-N-acetylglucosaminyltransferase A (EC 2.4.1.155) (Alpha-mannoside beta-1,6-N-acetylglucosaminyltransferase) (GlcNAc-T V) (GNT-V) (Mannoside acetylglucosaminyltransferase 5) (N-acetylglucosaminyl-transferase V)
H0Y615	MICA	66	1000	R.AKPQGQWAEDVLGN*KTWDRETR.D	2.421	-0.06	647.824	4	AEDVLGNKTWDRE	7	MHC class I polypeptide-related sequence A (Fragment)
H0Y615	MICA	111	1000	R.SEASEGN*ITVTCR.A	2.699	-2.85	713.82	2	SEASEGNITVTCR	4	MHC class I polypeptide-related sequence A (Fragment)
Q29983	MICA	125	1000	R.VCEIHEDN*STR.S	2.776	0.73	454.867	3	CEIHEDNSTRSSQ	1	MHC class I polypeptide-related sequence A (MIC-A)
H0Y615	MICA	152	1000	R.QDGVSLSHDTQQWGDVLPDGN*GTYQTWVATR.I	4.112	0.54	1145.53	3	DVLPDGNGTYQTW	5	MHC class I polypeptide-related sequence A (Fragment)
A2AC57	MICB	218	1000	R.QDGVSLSHN*TQQWGDVLPDGN*GTYQTWVATR.I	4.439	2.36	1146.2	3	DVLPDGNGTYQTW	1	MHC class I polypeptide-related sequence B
P08473	MME	285	23.956	K.VMELEKEIAN*ATAKPEDRNDPMLLYNK.M	3.203	-0.26	784.645	4	LEKEIANATAKPE	2	Neprilysin (EC 3.4.24.11) (Atriopeptidase) (Common acute lymphocytic leukemia antigen) (CALLA) (Enkephalinase) (Neutral endopeptidase 24.11) (NEP) (Neutral endopeptidase) (Skin fibroblast elastase) (SFE) (CD antigen CD10)
Q6UVY6	MOXD1	114	1000	K.DAQQDYHLEYAM^EN*STHTIIEFTR.E	2.611	-0.04	733.58	4	LEYAMENSTHTII	7	DBH-like monooxygenase protein 1 (EC 1.14.17.-) (Monooxygenase X)
Q6UVY6	MOXD1	517	36.556	K.QYKN*LSFMDAM^NK.F	1.84	-0.39	804.867	2	SPKQYKNLSFMDA	6	DBH-like monooxygenase protein 1 (EC 1.14.17.-) (Monooxygenase X)
F8WFC4	MPZL1	50	1000	K.EIFVAN*GTQGK.L	2.68	-0.15	583.8	2	KEIFVANGTQGKL	2	Myelin protein zero-like protein 1
O95297	MPZL1	130	9.779	K.KDASINIENMQFIHN*GTYICDVKNPPDIVVQPGHIR.L	3.174	-0.6	828.017	5	NMQFIHNGTYICD	13	Myelin protein zero-like protein 1 (Protein zero-related)
Q9UBG0	MRC2	69	1000	R.VTPACN*TSLPAQR.W	2.633	-2.58	709.351	2	RVTPACNTSLPAQ	2	C-type mannose receptor 2 (C-type lectin domain family 13 member E) (Endocytic receptor 180) (Macrophage mannose receptor 2) (Urokinase-type plasminogen activator receptor-associated protein) (UPAR-associated protein) (Urokinase receptor-associated protein) (CD antigen CD280)
Q9UBG0	MRC2	140	1000	R.TSN*ISKPGTLER.G	2.075	-0.17	653.348	2	LGARTSNISKPGT	2	C-type mannose receptor 2 (C-type lectin domain family 13 member E) (Endocytic receptor 180) (Macrophage mannose receptor 2) (Urokinase-type plasminogen activator receptor-associated protein) (UPAR-associated protein) (Urokinase receptor-associated protein) (CD antigen CD280)
Q9UBG0	MRC2	497	26.927	R.WNDSPCN*QSLPSICKK.A	3.511	-0.83	968.942	2	WNDSPCNQSLPSI	3	C-type mannose receptor 2 (C-type lectin domain family 13 member E) (Endocytic receptor 180) (Macrophage mannose receptor 2) (Urokinase-type plasminogen activator receptor-associated protein) (UPAR-associated protein) (Urokinase receptor-associated protein) (CD antigen CD280)
B4DHB2	MYRF	515	1000	R.VALLGQAN*CSSEALAQPATDYHFHFYR.L	3.685	-0.59	768.115	4	ALLGQANCSSEAL	2	Myelin regulatory factor (cDNA FLJ59324)
P54802	NAGLU	503	1000	R.SVYN*CSGEACR.G	2.277	3.04	653.26	2	LLRSVYNCSGEAC	1	Alpha-N-acetylglucosaminidase (EC 3.2.1.50) (N-acetyl-alpha-glucosaminidase) (NAG) [Cleaved into: Alpha-N-acetylglucosaminidase 82 kDa form; Alpha-N-acetylglucosaminidase 77 kDa form]
P54802	NAGLU	526	1000	R.RPSLQMN*TSIWYN*RSDVFEAWR.L	2.785	0.84	691.334	4	RPSLQMNTSIWYN	4	Alpha-N-acetylglucosaminidase (EC 3.2.1.50) (N-acetyl-alpha-glucosaminidase) (NAG) [Cleaved into: Alpha-N-acetylglucosaminidase 82 kDa form; Alpha-N-acetylglucosaminidase 77 kDa form]
P54802	NAGLU	532	1000	R.RPSLQMN*TSIWYN*RSDVFEAWR.L	2.785	0.84	691.334	4	NTSIWYNRSDVFE	4	Alpha-N-acetylglucosaminidase (EC 3.2.1.50) (N-acetyl-alpha-glucosaminidase) (NAG) [Cleaved into: Alpha-N-acetylglucosaminidase 82 kDa form; Alpha-N-acetylglucosaminidase 77 kDa form]
Q9UK23	NAGPA	366	1000	R.GPGCDELDCGPSN*CSQHGLCTETGCR.C	1.921	-0.18	732.53	4	LDCGPSNCSQHGL	4	N-acetylglucosamine-1-phosphodiester alpha-N-acetylglucosaminidase (EC 3.1.4.45) (Mannose 6-phosphate-uncovering enzyme) (Phosphodiester alpha-GlcNAcase)
Q9UK23	NAGPA	388	1000	R.CDAGWTGSN*CSEECPLGWHGPGCQRPCK.C	4.207	0.57	817.327	4	AGWTGSNCSEECP	6	N-acetylglucosamine-1-phosphodiester alpha-N-acetylglucosaminidase (EC 3.1.4.45) (Mannose 6-phosphate-uncovering enzyme) (Phosphodiester alpha-GlcNAcase)
H7BYX6	NCAM1	346	1000	R.TSTRN*ISSEEK.A	2.163	0.29	418.874	3	WRTSTRNISSEEK	1	Neural cell adhesion molecule 1
H7BYX6	NCAM1	487	5.085	K.IYNTPSASYLEVTPDSENDFGNYN*CTAVNR.I	3.625	1.13	1138.84	3	NDFGNYNCTAVNR	3	Neural cell adhesion molecule 1
H9KV31	NCAM2	303	2.806	R.DKLVLPAKN*TTNLK.T	2.528	0.02	519.975	3	LVLPAKNTTNLKT	1	Neural cell adhesion molecule 2
H9KV31	NCAM2	332	49.59	R.YN*CTATNHIGTR.F	2.639	-0.34	470.882	3	NDFGRYNCTATNH	1	Neural cell adhesion molecule 2
Q68D85	NCR3LG1	242	1000	R.SN*FTLTAAR.H	2.271	-1.87	492.255	2	HTPLRSNFTLTAA	3	Natural cytotoxicity triggering receptor 3 ligand 1 (B7 homolog 6) (B7-H6)
E7ENA9	NCSTN	129	1000	R.TSLELWM^HTDPVSQKN*ESVR.N	2.506	0.02	594.79	4	DPVSQKNESVRNQ	8	Nicastrin
E7ENA9	NCSTN	159	1000	R.RPN*QSQPLPPSSLQR.F	2.085	-0.33	569.972	3	VILRRPNQSQPLP	7	Nicastrin
E7ENA9	NCSTN	177	75.564	R.ARN*ISGVVLADHSGAFHNK.Y	3.118	0.14	499.762	4	RFLRARNISGVVL	2	Nicastrin
F6Y097	NCSTN	187	40.751	R.EIQWNSLGNGLAYEDFSFPIFLLEDEN*ETKVIK.Q	3.184	-3.41	1287.97	3	FLLEDENETKVIK	3	Nicastrin
E7ENA9	NCSTN	248	1000	R.ALYELAGGTN*FSDTVQADPQTVTR.L	3.795	1.78	853.083	3	ELAGGTNFSDTVQ	2	Nicastrin
E7ENA9	NCSTN	272	0	K.AN*NSWFQSILR.Q	2.572	0.33	669.838	2	GFLIKANNSWFQS	1	Nicastrin
E7ENA9	NCSTN	304	1000	R.SYLGDGPLQHYIAVSSPTN*TTYVVQYALAN*LTGTVVN*LTR.E	3.543	0.7	1077.3	4	AVSSPTNTTYVVQ	5	Nicastrin
E7ENA9	NCSTN	315	1000	R.SYLGDGPLQHYIAVSSPTN*TTYVVQYALAN*LTGTVVN*LTR.E	3.543	0.7	1077.3	4	VQYALANLTGTVV	5	Nicastrin
E7ENA9	NCSTN	322	1000	R.SYLGDGPLQHYIAVSSPTN*TTYVVQYALAN*LTGTVVN*LTR.E	3.543	0.7	1077.3	4	LTGTVVNLTREQC	5	Nicastrin
E7ENA9	NCSTN	354	33.616	K.VPSENKDLYEYSWVQGPLHSN*ETDR.L	2.794	0.67	989.462	3	QGPLHSNETDRLP	10	Nicastrin
E7EVJ3	NDST1	351	47.045	R.AHIPN*FTFNLGYSGK.F	2.873	-0.47	556.947	3	LRAHIPNFTFNLG	2	Bifunctional heparan sulfate N-deacetylase/N-sulfotransferase 1
Q59FP8	NEO1	166	1000	R.TPASDPHGDN*LTYSVFYTK.E	3.322	0.32	705.997	3	SDPHGDNLTYSVF	1	Neogenin (Neogenin homolog 1 variant) (Fragment)
H0YJV3	NID2	20	1000	R.IHQN*ITYQVCR.H	2.938	0.22	717.856	2	SYRIHQNITYQVC	2	Nidogen-2 (Fragment)
Q04721	NOTCH2	46	1000	R.DGYEPCVN*EGM^CVTYHN*GTGYCK.C	2.478	7.58	911.69	3	MCVTYHNGTGYCK	1	Neurogenic locus notch homolog protein 2 (Notch 2) (hN2) [Cleaved into: Notch 2 extracellular truncation; Notch 2 intracellular domain]
M0R3C9	NOTCH3	1126	1000	R.CLHN*GTCVDLVGGFR.C	2.705	0.27	569.933	3	GPRCLHNGTCVDL	4	Neurogenic locus notch homolog protein 3 (Fragment)
O15118	NPC1	122	1000	R.QSQFLN*VTATEDYVDPVTN*QTK.T	4.175	-0.24	835.398	3	RQSQFLNVTATED	3	Niemann-Pick C1 protein
O15118	NPC1	135	1000	R.QSQFLN*VTATEDYVDPVTN*QTK.T	4.175	-0.24	835.398	3	YVDPVTNQTKTNV	3	Niemann-Pick C1 protein
O15118	NPC1	158	9.107	K.ELQYYVGQSFANAMYN*ACRDVEAPSSNDK.A	3.433	0.55	1110.82	3	FANAMYNACRDVE	15	Niemann-Pick C1 protein
O15118	NPC1	185	40.978	K.DADACN*ATNWIEYMFNKDNGQAPFTITPVFSDFPVHGMEPMNN*ATK.G	4.62	1.93	1304.58	4	KDADACNATNWIE	1	Niemann-Pick C1 protein
O15118	NPC1	222	0	K.DADACN*ATNWIEYMFNKDNGQAPFTITPVFSDFPVHGMEPMNN*ATK.G	4.724	1.93	1303.83	4	GMEPMNNATKGCD	1	Niemann-Pick C1 protein
O15118	NPC1	598	0	K.NYKNPN*LTISFTAER.S	3.327	0.07	590.968	3	KNYKNPNLTISFT	3	Niemann-Pick C1 protein (cDNA FLJ51802, highly similar to Niemann-Pick C1 protein)
O15118	NPC1	916	5.75	K.GQNMVCGGMGCNN*DSLVQQIFNAAQLDN*YTR.I	4.103	0.34	871.131	4	GGMGCNNDSLVQQ	2	Niemann-Pick C1 protein (cDNA FLJ51802, highly similar to Niemann-Pick C1 protein)
O15118	NPC1	932	37.549	K.GQNMVCGGMGCNN*DSLVQQIFNAAQLDN*YTR.I	4.103	0.34	871.131	4	AAQLDNYTRIGFA	2	Niemann-Pick C1 protein (cDNA FLJ51802, highly similar to Niemann-Pick C1 protein)
O15118	NPC1	961	1000	R.VDN*ITDQFCN*ASVVDPACVR.C	3.944	-1.92	1143.51	2	SCCRVDNITDQFC	4	Niemann-Pick C1 protein (cDNA FLJ51802, highly similar to Niemann-Pick C1 protein)
O15118	NPC1	969	1000	R.VDN*ITDQFCN*ASVVDPACVR.C	3.944	-1.92	1143.51	2	TDQFCNASVVDPA	4	Niemann-Pick C1 protein (cDNA FLJ51802, highly similar to Niemann-Pick C1 protein)
O15118	NPC1	1064	1000	R.LIASN*VTETMGIN*GSAYR.V	2.277	0.08	634.98	3	ARLIASNVTETMG	16	Niemann-Pick C1 protein (cDNA FLJ51802, highly similar to Niemann-Pick C1 protein)
O15118	NPC1	1073	1000	R.LIASN*VTETMGIN*GSAYR.V	2.277	0.08	634.98	3	ETMGINGSAYRVF	16	Niemann-Pick C1 protein (cDNA FLJ51802, highly similar to Niemann-Pick C1 protein)
F5GYM7	NPTN	71	1000	R.KKEN*GM^PMDIVN*TSGR.F	2.181	-0.16	600.286	3	IWRKKENGMPMDI	14	Neuroplastin
F5GYM7	NPTN	79	1000	R.KKEN*GM^PMDIVN*TSGR.F	2.181	-0.16	600.286	3	MPMDIVNTSGRFF	14	Neuroplastin
F5GZD0	NPTN	171	1000	R.IVTSEEVIIRDSPVLPVTLQCN*LTSSSHTLTYSYWTK.N	4.526	3.39	1414.4	3	PVTLQCNLTSSSH	1	Neuroplastin
F5GZD0	NPTN	197	42.098	K.N*ASNM^EYR.I	1.765	0.1	502.205	2	LSATRKNASNMEY	2	Neuroplastin
F5GZD0	NPTN	229	1000	K.AN*ATIEVK.A	2.372	0.14	424.734	2	VSAPKANATIEVK	2	Neuroplastin
C9JH43	NRCAM	270	1.728	R.ERPPTFLTPEGN*ASNKEELR.G	2.76	-0.09	572.79	4	FLTPEGNASNKEE	2	Neuronal cell adhesion molecule (Fragment)
C9JYY6	NRCAM	839	5.75	R.VNVVN*STLAEVHWDPVPLK.S	4.176	-0.64	1060.57	2	VRVNVVNSTLAEV	3	Neuronal cell adhesion molecule
E7EX60	NRP1	150	1000	K.RGPECSQN*YTTPSGVIK.S	2.295	0.04	948.954	2	GPECSQNYTTPSG	6	Neuropilin-1
E7EX60	NRP1	522	9.34	K.IGYSNN*GSDWK.M	1.994	-0.17	622.277	2	KIGYSNNGSDWKM	1	Neuropilin-1
F5H1G4	NRP2	152	1000	K.TGSEDCSKN*FTSPN*GTIESPGFPEK.Y	4.201	0.18	898.062	3	SEDCSKNFTSPNG	3	Neuropilin-2
F5H1G4	NRP2	157	1000	K.TGSEDCSKN*FTSPN*GTIESPGFPEK.Y	4.201	0.18	898.062	3	KNFTSPNGTIESP	3	Neuropilin-2
H0Y3X5	NT5E	29	1000	R.IKLDN*YSTQELGK.T	2.192	0.11	504.599	3	WRIKLDNYSTQEL	2	5'-nucleotidase (Fragment)
Q16620	NTRK2	338	12.161	K.IHVTN*HTEYHGCLQLDNPTHM^NNGDYTLIAK.N	3.503	1.04	725.94	5	TKIHVTNHTEYHG	1	BDNF/NT-3 growth factors receptor (EC 2.7.10.1) (GP145-TrkB) (Trk-B) (Neurotrophic tyrosine kinase receptor type 2) (TrkB tyrosine kinase) (Tropomyosin-related kinase B)
Q969Y0	NXPE3	292	1000	K.MPVN*SSGPDWVTVIPR.R	3.275	1.49	879.444	2	NIKMPVNSSGPDW	2	NXPE family member 3 (Protein FAM55C)
Q86WC4	OSTM1	135	1000	R.AAGN*TSESQSCAR.S	1.588	-0.11	671.283	2	ISRAAGNTSESQS	2	Osteopetrosis-associated transmembrane protein 1 (Chloride channel 7 beta subunit)
B7Z4R5	P2RX4	52	1000	R.CVAFN*GSVK.T	2.294	0.24	492.739	2	GRCVAFNGSVKTC	1	P2X purinoceptor
B7Z1M5	P2RX4	75	1000	K.VKGVAVTN*TSK.L	1.951	-0.1	553.819	2	KGVAVTNTSKLGF	1	P2X purinoceptor 4 (cDNA FLJ50452, highly similar to P2X purinoceptor 4)
B7Z4R5	P2RX4	83	1000	K.AAEN*FTLLVK.N	2.485	-0.61	554.81	2	FLKAAENFTLLVK	3	P2X purinoceptor
F5H3L5	PCDH1	791	1000	R.YGTALVHLYVN*ETLAN*R.T	4.047	-1.39	647.334	3	LVHLYVNETLANR	2	Protocadherin-1
F5H3L5	PCDH1	796	1000	R.YGTALVHLYVN*ETLAN*R.T	4.047	-1.39	647.334	3	VNETLANRTLLET	2	Protocadherin-1
O14917	PCDH17	566	1000	K.DSGAPAHLESN*ATVR.V	2.424	-3.71	764.365	2	PAHLESNATVRVT	2	Protocadherin-17 (Protocadherin-68)
F5GWJ1	PCDH7	79	1000	K.IDN*LTGELSTSER.R	2.118	1.21	719.352	2	EYLKIDNLTGELS	1	Protocadherin-7
F5GWJ1	PCDH7	822	1000	R.LVVQVN*DSGQPSQSTTTLVHVFVN*ESVSN*ATAIDSQIAR.S	3.763	-0.89	1031.02	4	RLVVQVNDSGQPS	2	Protocadherin-7
F5GWJ1	PCDH7	840	1000	R.LVVQVN*DSGQPSQSTTTLVHVFVN*ESVSN*ATAIDSQIAR.S	3.763	-0.89	1031.02	4	LVHVFVNESVSNA	2	Protocadherin-7
F5GWJ1	PCDH7	845	1000	R.LVVQVN*DSGQPSQSTTTLVHVFVN*ESVSN*ATAIDSQIAR.S	3.763	-0.89	1031.02	4	VNESVSNATAIDS	2	Protocadherin-7
Q5VT82	PCDH9	48	4.988	K.DLN*ISHINAATGTSASLVYR.L	2.87	0.28	702.695	3	NIPKDLNISHINA	1	Protocadherin 9 (Protocadherin-9)
Q5VT82	PCDH9	306	24.437	R.LFALN*NTTGLITVQR.S	4.418	0.68	832.467	2	KRLFALNNTTGLI	1	Protocadherin 9 (Protocadherin-9)
Q5VT82	PCDH9	307	0	R.LFALNN*TTGLITVQR.S	3.443	0.25	555.314	3	RLFALNNTTGLIT	2	Protocadherin 9 (Protocadherin-9)
Q5VT82	PCDH9	368	110.633	R.YIISPIN*GTVYLSEKDPVNTK.I	3.866	0.29	1177.62	2	YIISPINGTVYLS	2	Protocadherin 9 (Protocadherin-9)
Q5VT82	PCDH9	450	1000	K.IVASDSGKPSLN*QTALVR.V	2.65	0.31	620.342	3	SGKPSLNQTALVR	3	Protocadherin 9 (Protocadherin-9)
Q5VT82	PCDH9	630	1000	K.SN*VSFDREQQSSYTFDVK.A	2.951	0.42	713.996	3	SGVIKSNVSFDRE	3	Protocadherin 9 (Protocadherin-9)
Q5VT82	PCDH9	681	51.572	K.VTINVMDVNDNSPVVISPPSN*TSFK.L	4.485	4.1	1339.17	2	VISPPSNTSFKLV	3	Protocadherin 9 (Protocadherin-9)
Q5VT82	PCDH9	754	1000	R.LVVN*ISDLGYPK.S	2.504	-0.86	660.868	2	LHRLVVNISDLGY	2	Protocadherin 9 (Protocadherin-9)
Q9UN70	PCDHGC3	245	38.189	K.VLDANDNAPVFN*QSLYR.A	3.778	-0.56	969.975	2	DNAPVFNQSLYRA	2	Protocadherin gamma-C3 (PCDH-gamma-C3) (Protocadherin-2) (Protocadherin-43) (PC-43)
Q9UN70	PCDHGC3	424	1000	K.TSADLDRETVPEYN*LSITAR.D	2.807	0.8	752.042	3	ETVPEYNLSITAR	1	Protocadherin gamma-C3 (PCDH-gamma-C3) (Protocadherin-2) (Protocadherin-43) (PC-43)
E7EUT2	PIEZO1	162	1000	R.ELYN*GTADITLR.F	2.803	-0.48	684.848	2	MKRELYNGTADIT	1	Piezo-type mechanosensitive ion channel component 1
D6R9J9	PIGG	56	1000	R.AEHGAEPPAPEPSAGASSN*WTTLPPPLFSK.V	2.534	1.5	1016.16	3	SAGASSNWTTLPP	7	GPI ethanolamine phosphate transferase 2
B7Z1N3	PIGT	65	6.591	K.TYAIYDLLDTAMIN*NSR.N	2.461	0.27	659.656	3	LDTAMINNSRNLN	1	GPI transamidase component PIG-T (cDNA FLJ51050, highly similar to GPI transamidase component PIG-T) (cDNA FLJ61680, highly similar to GPI transamidase component PIG-T)
B4DN26	PLAT	394	1000	R.CTSQHLLN*R.T	1.905	-0.06	377.854	3	TSQHLLNRTVTDN	1	Tissue-type plasminogen activator chain A (cDNA FLJ59355, highly similar to Tissue-type plasminogen activator (EC 3.4.21.68))
M0QYR6	PLAUR	197	1000	K.GN*STHGCSSEETFLIDCR.G	2.128	-0.93	691.622	3	CYSCKGNSTHGCS	2	Urokinase plasminogen activator surface receptor (Fragment)
Q03405	PLAUR	255	80.411	R.GPMNQCLVATGTHEPKN*QSYMVR.G	2.819	-0.32	656.059	4	GTHEPKNQSYMVR	3	Urokinase plasminogen activator surface receptor (U-PAR) (uPAR) (Monocyte activation antigen Mo3) (CD antigen CD87)
M0QZI4	PLD3	122	1000	R.DN*HTHSDIQVK.L	2.64	-0.5	432.873	3	LAALRDNHTHSDI	3	Phospholipase D3 (Fragment)
Q8IV08	PLD3	236	1000	K.ELGVVM^YN*CSCLAR.D	2.706	-1.96	845.876	2	LGVVMYNCSCLAR	6	Phospholipase D3 (PLD 3) (EC 3.1.4.4) (Choline phosphatase 3) (HindIII K4L homolog) (Hu-K4) (Phosphatidylcholine-hydrolyzing phospholipase D3)
B3KUE5	PLTP	163	1000	K.VSN*VSCQASVSR.M	2.823	-0.4	648.808	2	GRMKVSNVSCQAS	1	Phospholipid transfer protein (Phospholipid transfer protein, isoform CRA_c) (cDNA FLJ39690 fis, clone SMINT2010639, highly similar to PHOSPHOLIPID TRANSFER PROTEIN)
Q6UX71	PLXDC2	160	1000	R.VN*LSFDFPFYGHFLR.E	2.587	-0.28	621.31	3	RQAARVNLSFDFP	2	Plexin domain-containing protein 2 (Tumor endothelial marker 7-related protein)
Q6UX71	PLXDC2	316	49.216	K.ITN*ISAVEMTPLPTCLQFNR.C	2.776	-0.3	770.057	3	QMSKITNISAVEM	3	Plexin domain-containing protein 2 (Tumor endothelial marker 7-related protein)
F8VSZ4	PLXNA1	54	1000	K.LSGN*LTLLR.A	2.146	-0.14	495.297	2	IYKLSGNLTLLRA	2	Plexin-A1
F8VSZ4	PLXNA1	678	1000	R.VN*VSEDCPQILPSTQIYVPVGVVKPITLAAR.N	3.292	0.58	1122.95	3	FLEGRVNVSEDCP	2	Plexin-A1
F8VSZ4	PLXNA1	1020	18.978	R.AQLTNPEVKYN*YTEDPTILR.I	3.318	-1.11	790.068	3	NPEVKYNYTEDPT	4	Plexin-A1
F8VSZ4	PLXNA1	1117	1000	R.SLLVLN*STSFLYYPDPVLEPLSPTGLLELKPSSPLILK.G	2.979	3.24	1386.45	3	RSLLVLNSTSFLY	4	Plexin-A1
F8VSZ4	PLXNA1	1164	1000	R.LN*YTVLIGSTPCTLTVSETQLLCEAPN*LTGQHK.V	3.576	-2.44	1222.28	3	PGNSRLNYTVLIG	1	Plexin-A1
F8VSZ4	PLXNA1	1189	1000	R.LN*YTVLIGSTPCTLTVSETQLLCEAPN*LTGQHK.V	3.576	-2.44	1222.28	3	LLCEAPNLTGQHK	1	Plexin-A1
O75051	PLXNA2	76	1000	K.LTGN*LTIQVAHK.T	1.952	0.22	433.25	3	VYKLTGNLTIQVA	3	Plexin-A2 (Semaphorin receptor OCT)
O75051	PLXNA2	655	90.913	K.FYN*CSAHQLCLSCVNSAFR.C	4.563	0.52	779.675	3	TEFKFYNCSAHQL	1	Plexin-A2 (Semaphorin receptor OCT)
P51805	PLXNA3	1009	1000	R.AN*ISSPGLIYTYTQDPTVTR.L	2.336	0.43	734.039	3	LAIDRANISSPGL	2	Plexin-A3 (Plexin-4) (Semaphorin receptor SEX)
P51805	PLXNA3	1073	33.657	R.GIETTNTCQVIN*DTAMLCK.A	2.343	2.82	1086.5	2	NTCQVINDTAMLC	3	Plexin-A3 (Plexin-4) (Semaphorin receptor SEX)
O43157	PLXNB1	1253	1000	K.YTLDPN*ITSAGPTK.S	3.252	-0.02	740.874	2	KYTLDPNITSAGP	1	Plexin-B1 (Semaphorin receptor SEP)
H0Y6J7	PLXNB2	86	1000	K.VVFLSPAVPEEPEAYN*LTVLIEM^DGHR.A	2.634	-0.17	1015.51	3	EEPEAYNLTVLIE	2	Plexin-B2 (Fragment)
H0Y6J7	PLXNB2	117	1000	R.TEAGAFEYVPDPTFEN*FTGGVKK.Q	2.853	1.17	836.401	3	PDPTFENFTGGVK	9	Plexin-B2 (Fragment)
A6QRH1	PLXNB2	127	1000	R.ALSN*ISLR.L	1.804	0.08	438.755	2	ALRALSNISLRLF	2	Plexin-B2 (Fragment)
E2PU09	PLXNB2	391	49.312	R.GGLN*LTAVTVAAENN*HTVAFLGTSDGR.I	5.366	0.55	1346.17	2	LQRGGLNLTAVTV	1	Plexin-B2 (Fragment)
E2PU09	PLXNB2	402	24.437	R.GGLN*LTAVTVAAENN*HTVAFLGTSDGR.I	5.366	0.55	1346.17	2	TVAAENNHTVAFL	1	Plexin-B2 (Fragment)
O15031	PLXNB2	528	1000	K.SCVAVTSAQPQN*M^SR.R	2.015	-1.08	827.873	2	TSAQPQNMSRRAQ	9	Plexin-B2 (MM1)
O15031	PLXNB2	733	1000	K.LSHDAN*ETLPLHLYVK.S	3.95	0.01	463.998	4	KLSHDANETLPLH	3	Plexin-B2 (MM1)
O15031	PLXNB2	795	1000	R.CVYEALCN*TTSECPPPVITR.I	3.544	-0.99	790.693	3	VYEALCNTTSECP	3	Plexin-B2 (MM1)
O15031	PLXNB2	844	1000	R.ISVAGRN*CSFQPER.Y	1.875	0.82	541.932	3	ISVAGRNCSFQPE	2	Plexin-B2 (MM1)
O15031	PLXNB2	1049	1000	R.EAESLQPMTVVGTDYVFHN*DTK.V	2.422	-0.03	828.721	3	TDYVFHNDTKVVF	8	Plexin-B2 (MM1)
H0YA64	PLXND1	63	17.009	K.INLN*ESMQVVSR.R	2.574	0.31	696.856	2	LLKINLNESMQVV	2	Plexin-D1 (Fragment)
H0Y9D1	PLXND1	76	1000	R.CTLQQDCTN*SSQQHFWTSASEGPSR.C	3.247	1.48	972.413	3	LQQDCTNSSQQHF	3	Plexin-D1 (Fragment)
Q9Y4D7	PLXND1	155	1000	R.RRGN*ISAVAVR.F	2.88	0.02	401.239	3	QLRRRGNISAVAV	1	Plexin-D1
Q9Y4D7	PLXND1	1099	1000	R.FHMVQN*VSMAVHHIGR.E	2.393	0.63	467.234	4	RFHMVQNVSMAVH	1	Plexin-D1
F5GWY5	PODXL	362	6.039	K.QLVLN*LTGNTLCAGGASDEK.L	3.527	-0.36	688.677	3	EKQLVLNLTGNTL	1	Podocalyxin
Q9NZ53	PODXL2	480	1000	R.SLEEIGIQN*YSTTSSCQAR.A	3.152	-0.58	716.331	3	EEIGIQNYSTTSS	4	Podocalyxin-like protein 2 (Endoglycan)
O14495	PPAP2B	170	10.121	R.LRPHFLSVCNPDFSQIN*CSEGYIQNYR.C	3.07	0.77	830.14	4	PDFSQINCSEGYI	8	Lipid phosphate phosphohydrolase 3 (EC 3.1.3.4) (PAP2-beta) (Phosphatidate phosphohydrolase type 2b) (Phosphatidic acid phosphatase 2b) (PAP-2b) (PAP2b) (Vascular endothelial growth factor and type I collagen-inducible protein) (VCIP)
C9J5S7	PPIA	108	31.275	K.HTGPGILSMANAGPNTN*GSQFFICTAK.T	4.736	1.45	932.112	3	NAGPNTNGSQFFI	1	Peptidyl-prolyl cis-trans isomerase (EC 5.2.1.8)
H0Y548	PPIF	114	20.167	K.HVGPGVLSMANAGPNTN*GSQFFICTIK.T	3.309	0.46	940.795	3	NAGPNTNGSQFFI	2	Peptidyl-prolyl cis-trans isomerase (EC 5.2.1.8) (Fragment)
Q5SGD2	PPM1L	117	1000	R.RDHMEDRFEVLTDLAN*K.T	2.692	-1.54	523.755	4	VLTDLANKTHPSI	1	Protein phosphatase 1L (EC 3.1.3.16) (Protein phosphatase 1-like) (Protein phosphatase 2C isoform epsilon) (PP2C-epsilon)
E9PIA8	PPT1	122	38.238	R.LVQAEYWHDPIKEDVYRN*HSIFLADINQER.G	4.04	-0.61	926.211	4	KEDVYRNHSIFLA	2	Palmitoyl-protein thioesterase 1 (Fragment)
A2A2V1	PRNP	181	18.957	R.YPNQVYYRPMDEYSNQNNFVHDCVN*ITIK.Q	4.138	0.35	906.916	4	FVHDCVNITIKQH	2	Major prion protein (Fragment)
A2A2V1	PRNP	197	1000	K.GEN*FTETDVK.M	2.328	-1.81	571.758	2	TTTKGENFTETDV	3	Major prion protein (Fragment)
Q9UNN8	PROCR	47	1000	R.DPYHVWYQGN*ASLGGHLTHVLEGPDTN*TTIIQLQPLQEPESWAR.T	3.539	-0.56	1244.36	4	HVWYQGNASLGGH	4	Endothelial protein C receptor (Activated protein C receptor) (APC receptor) (Endothelial cell protein C receptor) (CD antigen CD201)
Q9UNN8	PROCR	64	1000	R.DPYHVWYQGN*ASLGGHLTHVLEGPDTN*TTIIQLQPLQEPESWAR.T	3.539	-0.56	1244.36	4	LEGPDTNTTIIQL	4	Endothelial protein C receptor (Activated protein C receptor) (APC receptor) (Endothelial cell protein C receptor) (CD antigen CD201)
Q6P2Q9	PRPF8	1797	30.687	K.TFEGN*LTTKPINGAIFIFNPR.T	3.322	-0.86	785.085	3	HKTFEGNLTTKPI	1	Pre-mRNA-processing-splicing factor 8 (220 kDa U5 snRNP-specific protein) (PRP8 homolog) (Splicing factor Prp8) (p220)
B1AVU8	PSAP	80	1000	K.DVVTAAGDMLKDN*ATEEEILVYLEK.T	3.256	-2.26	923.791	3	GDMLKDNATEEEI	3	Saposin-D
B1AVU8	PSAP	101	1000	K.TCDWLPKPN*MSASCK.E	2.652	-0.52	599.933	3	DWLPKPNMSASCK	1	Saposin-D
B1AVU8	PSAP	332	6.591	K.LIDNN*KTEKEILDAFDK.M	2.481	-1.06	670.348	3	TKLIDNNKTEKEI	1	Saposin-D
B1AVU8	PSAP	426	7.971	R.NLEKN*STKQEILAALEK.G	3.362	-0.78	644.689	3	DRNLEKNSTKQEI	3	Saposin-D
F8VXL8	PTCH1	32	2.017	K.AEVGHGYMDRPCLNPADPDCPATAPNKN*STKPLDMALVLN*GGCHGLSR.K	3.625	-0.32	864.237	6	ATAPNKNSTKPLD	1	Protein patched homolog 1 (Fragment)
F8VXL8	PTCH1	44	16.834	K.AEVGHGYMDRPCLNPADPDCPATAPNKN*STKPLDMALVLN*GGCHGLSR.K	3.625	-0.32	864.237	6	DMALVLNGGCHGL	1	Protein patched homolog 1 (Fragment)
H0Y3B8	PTCH1	66	1000	R.KYM^HWQEELIVGGTVKN*STGK.L	4.396	0.36	606.809	4	VGGTVKNSTGKLV	1	Protein patched homolog 1 (Fragment)
H0Y3B8	PTCH1	131	1000	R.TYVEVVHQSVAQN*STQK.V	3.971	-0.61	640.989	3	HQSVAQNSTQKVL	1	Protein patched homolog 1 (Fragment)
Q9P2B2	PTGFRN	286	1000	R.AAVPKN*VSVAEGK.E	3.167	0.27	424.906	3	RAAVPKNVSVAEG	1	Prostaglandin F2 receptor negative regulator (CD9 partner 1) (CD9P-1) (Glu-Trp-Ile EWI motif-containing protein F) (EWI-F) (Prostaglandin F2-alpha receptor regulatory protein) (Prostaglandin F2-alpha receptor-associated protein) (CD antigen CD315)
Q9P2B2	PTGFRN	300	1000	K.ELDLTCN*ITTDR.A	2.654	-0.57	727.339	2	ELDLTCNITTDRA	3	Prostaglandin F2 receptor negative regulator (CD9 partner 1) (CD9P-1) (Glu-Trp-Ile EWI motif-containing protein F) (EWI-F) (Prostaglandin F2-alpha receptor regulatory protein) (Prostaglandin F2-alpha receptor-associated protein) (CD antigen CD315)
Q9P2B2	PTGFRN	383	76.357	K.ENSGYYYCHVSLWAPGHN*R.S	3.4	0.2	771.673	3	LWAPGHNRSWHKV	3	Prostaglandin F2 receptor negative regulator (CD9 partner 1) (CD9P-1) (Glu-Trp-Ile EWI motif-containing protein F) (EWI-F) (Prostaglandin F2-alpha receptor regulatory protein) (Prostaglandin F2-alpha receptor-associated protein) (CD antigen CD315)
Q9P2B2	PTGFRN	413	1000	K.VAEAVSSPAGVGVTWLEPDYQVYLN*ASK.V	3.302	0.47	985.163	3	DYQVYLNASKVPG	1	Prostaglandin F2 receptor negative regulator (CD9 partner 1) (CD9P-1) (Glu-Trp-Ile EWI motif-containing protein F) (EWI-F) (Prostaglandin F2-alpha receptor regulatory protein) (Prostaglandin F2-alpha receptor-associated protein) (CD antigen CD315)
Q9P2B2	PTGFRN	600	1000	R.YSVLIMAEKPVGDLSSPN*ETKYIISLDQDSVVK.L	3.279	0.78	911.225	4	GDLSSPNETKYII	6	Prostaglandin F2 receptor negative regulator (CD9 partner 1) (CD9P-1) (Glu-Trp-Ile EWI motif-containing protein F) (EWI-F) (Prostaglandin F2-alpha receptor regulatory protein) (Prostaglandin F2-alpha receptor-associated protein) (CD antigen CD315)
Q9P2B2	PTGFRN	618	1000	K.LEN*WTDASR.V	1.698	0.09	547.754	2	SVVKLENWTDASR	2	Prostaglandin F2 receptor negative regulator (CD9 partner 1) (CD9P-1) (Glu-Trp-Ile EWI motif-containing protein F) (EWI-F) (Prostaglandin F2-alpha receptor regulatory protein) (Prostaglandin F2-alpha receptor-associated protein) (CD antigen CD315)
Q9P2B2	PTGFRN	691	55.776	R.EAATSLSNPIEIDFQTSGPIFN*ASVHSDTPSVIR.G	4.037	2.51	1201.93	3	TSGPIFNASVHSD	2	Prostaglandin F2 receptor negative regulator (CD9 partner 1) (CD9P-1) (Glu-Trp-Ile EWI motif-containing protein F) (EWI-F) (Prostaglandin F2-alpha receptor regulatory protein) (Prostaglandin F2-alpha receptor-associated protein) (CD antigen CD315)
H7C5L0	PTK7	36	1000	R.RATVFAN*GSLLLTQVRPR.N	2.874	0.23	668.053	3	RATVFANGSLLLT	5	Inactive tyrosine-protein kinase 7 (Fragment)
H0Y8F1	PTK7	50	1000	R.RQDVN*ITVATVPSWLK.K	2.284	0.33	610.672	3	QRRQDVNITVATV	2	Inactive tyrosine-protein kinase 7 (Fragment)
C9J9E8	PTK7	116	76.733	R.SAN*ASFNIK.C	2.637	-0.39	477.742	2	EEARSANASFNIK	2	Inactive tyrosine-protein kinase 7
Q13308	PTK7	175	1000	R.DGTPLSDGQSN*HTVSSK.E	1.979	0.69	578.268	3	LSDGQSNHTVSSK	3	Inactive tyrosine-protein kinase 7 (Colon carcinoma kinase 4) (CCK-4) (Protein-tyrosine kinase 7) (Pseudo tyrosine kinase receptor 7) (Tyrosine-protein kinase-like 7)
Q13308	PTK7	214	22.849	R.NLTLRPAGPEHSGLYSCCAHSAFGQACSSQN*FTLSIADESFAR.V	4.724	0.85	1180.29	4	QACSSQNFTLSIA	3	Inactive tyrosine-protein kinase 7 (Colon carcinoma kinase 4) (CCK-4) (Protein-tyrosine kinase 7) (Pseudo tyrosine kinase receptor 7) (Tyrosine-protein kinase-like 7)
Q13308	PTK7	567	1000	R.DDAGN*YTCIASN*GPQGQIR.A	2.71	-1.5	1021.94	2	TRDDAGNYTCIAS	2	Inactive tyrosine-protein kinase 7 (Colon carcinoma kinase 4) (CCK-4) (Protein-tyrosine kinase 7) (Pseudo tyrosine kinase receptor 7) (Tyrosine-protein kinase-like 7)
Q13308	PTK7	574	1000	R.DDAGN*YTCIASN*GPQGQIR.A	2.71	-1.5	1021.94	2	YTCIASNGPQGQI	2	Inactive tyrosine-protein kinase 7 (Colon carcinoma kinase 4) (CCK-4) (Protein-tyrosine kinase 7) (Pseudo tyrosine kinase receptor 7) (Tyrosine-protein kinase-like 7)
Q13308	PTK7	646	1000	R.MHIFQN*GSLVIHDVAPEDSGR.Y	1.977	0.22	582.035	4	RMHIFQNGSLVIH	5	Inactive tyrosine-protein kinase 7 (Colon carcinoma kinase 4) (CCK-4) (Protein-tyrosine kinase 7) (Pseudo tyrosine kinase receptor 7) (Tyrosine-protein kinase-like 7)
G3XAD5	PTPRD	711	1000	R.KVEVEAVN*STSVK.V	2.842	-0.34	464.92	3	VEVEAVNSTSVKV	3	Protein tyrosine phosphatase, receptor type, D, isoform CRA_c (Receptor-type tyrosine-protein phosphatase delta)
F2Z3B8	PTPRF	78	1000	R.KVEVEPLN*STAVHVYWK.L	5.08	-0.3	668.022	3	VEVEPLNSTAVHV	2	Receptor-type tyrosine-protein phosphatase F
P23470	PTPRG	113	12.431	R.VGEEYQELQLDGFDNESSN*KTWMK.N	3.776	0.35	950.761	3	FDNESSNKTWMKN	2	Receptor-type tyrosine-protein phosphatase gamma (Protein-tyrosine phosphatase gamma) (R-PTP-gamma) (EC 3.1.3.48)
P23470	PTPRG	156	1000	K.AEKVEFHWGHSN*GSAGSEHSIN*GR.R	2.819	-2.29	520.638	5	FHWGHSNGSAGSE	7	Receptor-type tyrosine-protein phosphatase gamma (Protein-tyrosine phosphatase gamma) (R-PTP-gamma) (EC 3.1.3.48)
P23470	PTPRG	444	1000	R.SDFSQTM^LFQAN*TTR.I	3.305	0.99	883.402	2	TMLFQANTTRIFQ	1	Receptor-type tyrosine-protein phosphatase gamma (Protein-tyrosine phosphatase gamma) (R-PTP-gamma) (EC 3.1.3.48)
Q12913	PTPRJ	258	66.19	R.LQVN*ISGLKPGVQYNINPYLLQSN*K.T	4.818	0.26	936.176	3	DSRLQVNISGLKP	3	Receptor-type tyrosine-protein phosphatase eta (Protein-tyrosine phosphatase eta) (R-PTP-eta) (EC 3.1.3.48) (Density-enhanced phosphatase 1) (DEP-1) (HPTP eta) (Protein-tyrosine phosphatase receptor type J) (R-PTP-J) (CD antigen CD148)
Q12913	PTPRJ	278	9.394	R.LQVN*ISGLKPGVQYNINPYLLQSN*K.T	4.818	0.26	936.176	3	PYLLQSNKTKGDP	3	Receptor-type tyrosine-protein phosphatase eta (Protein-tyrosine phosphatase eta) (R-PTP-eta) (EC 3.1.3.48) (Density-enhanced phosphatase 1) (DEP-1) (HPTP eta) (Protein-tyrosine phosphatase receptor type J) (R-PTP-J) (CD antigen CD148)
Q12913	PTPRJ	342	1000	R.YN*ATVYSQAAN*GTEGQPQAIEFR.T	2.443	1.49	841.06	3	EPGTRYNATVYSQ	3	Receptor-type tyrosine-protein phosphatase eta (Protein-tyrosine phosphatase eta) (R-PTP-eta) (EC 3.1.3.48) (Density-enhanced phosphatase 1) (DEP-1) (HPTP eta) (Protein-tyrosine phosphatase receptor type J) (R-PTP-J) (CD antigen CD148)
Q12913	PTPRJ	351	1000	R.YN*ATVYSQAAN*GTEGQPQAIEFR.T	2.443	1.49	841.06	3	VYSQAANGTEGQP	3	Receptor-type tyrosine-protein phosphatase eta (Protein-tyrosine phosphatase eta) (R-PTP-eta) (EC 3.1.3.48) (Density-enhanced phosphatase 1) (DEP-1) (HPTP eta) (Protein-tyrosine phosphatase receptor type J) (R-PTP-J) (CD antigen CD148)
Q12913	PTPRJ	391	1000	K.VSDN*ESSSN*YTYK.I	4.171	1.46	750.313	2	IWKVSDNESSSNY	1	Receptor-type tyrosine-protein phosphatase eta (Protein-tyrosine phosphatase eta) (R-PTP-eta) (EC 3.1.3.48) (Density-enhanced phosphatase 1) (DEP-1) (HPTP eta) (Protein-tyrosine phosphatase receptor type J) (R-PTP-J) (CD antigen CD148)
Q12913	PTPRJ	396	1000	K.VSDN*ESSSN*YTYK.I	4.171	1.46	750.313	2	DNESSSNYTYKIH	1	Receptor-type tyrosine-protein phosphatase eta (Protein-tyrosine phosphatase eta) (R-PTP-eta) (EC 3.1.3.48) (Density-enhanced phosphatase 1) (DEP-1) (HPTP eta) (Protein-tyrosine phosphatase receptor type J) (R-PTP-J) (CD antigen CD148)
Q12913	PTPRJ	413	44.278	K.IHVAGETDSSNLN*VSEPR.A	4.251	0.61	643.313	3	TDSSNLNVSEPRA	4	Receptor-type tyrosine-protein phosphatase eta (Protein-tyrosine phosphatase eta) (R-PTP-eta) (EC 3.1.3.48) (Density-enhanced phosphatase 1) (DEP-1) (HPTP eta) (Protein-tyrosine phosphatase receptor type J) (R-PTP-J) (CD antigen CD148)
Q12913	PTPRJ	431	1000	R.SSTFYN*ITVCPVLGDIEGTPGFLQVHTPPVPVSDFR.V	3.529	1.2	1317.33	3	RSSTFYNITVCPV	2	Receptor-type tyrosine-protein phosphatase eta (Protein-tyrosine phosphatase eta) (R-PTP-eta) (EC 3.1.3.48) (Density-enhanced phosphatase 1) (DEP-1) (HPTP eta) (Protein-tyrosine phosphatase receptor type J) (R-PTP-J) (CD antigen CD148)
Q12913	PTPRJ	824	8.463	R.NTCTTGITDPPPPDGSPN*ITSVSHNSVK.V	4.677	-0.27	966.122	3	PPDGSPNITSVSH	3	Receptor-type tyrosine-protein phosphatase eta (Protein-tyrosine phosphatase eta) (R-PTP-eta) (EC 3.1.3.48) (Density-enhanced phosphatase 1) (DEP-1) (HPTP eta) (Protein-tyrosine phosphatase receptor type J) (R-PTP-J) (CD antigen CD148)
B7ZMG0	PTPRK	140	36.556	R.VNKGPLANPIWN*VTGFTGR.D	2.195	1.17	682.034	3	LANPIWNVTGFTG	2	PTPRK protein (Receptor-type tyrosine-protein phosphatase kappa)
B7ZMG0	PTPRK	436	1000	R.GHN*ESKADCLDMDPK.A	2.462	-0.34	573.911	3	HYFRGHNESKADC	1	PTPRK protein (Receptor-type tyrosine-protein phosphatase kappa)
B7ZMG0	PTPRK	462	80.102	K.APQHVVNHLPPYTN*VSLK.M	3.286	0.19	505.024	4	HLPPYTNVSLKMI	1	PTPRK protein (Receptor-type tyrosine-protein phosphatase kappa)
E9PDC5	PTPRS	734	1000	R.KVEAEALN*ATAIR.V	3.587	0.08	463.593	3	VEAEALNATAIRV	1	Receptor-type tyrosine-protein phosphatase S
E9PDC5	PTPRS	941	1000	R.GHPQILEAAGN*ASAGTVLLR.W	2.202	-0.13	660.025	3	ILEAAGNASAGTV	1	Receptor-type tyrosine-protein phosphatase S
E9PH42	PTPRU	75	1000	R.APADLPHGSYLMVN*TSQHAPGQR.A	3.954	0.91	817.398	3	GSYLMVNTSQHAP	2	Receptor-type tyrosine-protein phosphatase U
E9PH42	PTPRU	548	22.529	K.LRN*ETYHVFSNLHPGTTYLFSVR.A	2.716	1.45	918.802	3	TISKLRNETYHVF	1	Receptor-type tyrosine-protein phosphatase U
A8MZH8	PTTG1IP	54	78.156	K.TCEECLKN*VSCLWCNTNK.A	4.706	-1.88	1159.99	2	CEECLKNVSCLWC	5	Pituitary tumor-transforming gene 1 protein-interacting protein
P15151	PVR	120	1000	R.VEDEGN*YTCLFVTFPQGSR.S	2.861	-1.95	1111.5	2	RVEDEGNYTCLFV	2	Poliovirus receptor (Nectin-like protein 5) (NECL-5) (CD antigen CD155)
Q15223	PVRL1	139	24.465	R.ESQLN*LTVMAKPTNWIEGTQAVLR.A	2.981	-0.65	901.473	3	NRESQLNLTVMAK	2	Poliovirus receptor-related protein 1 (Herpes virus entry mediator C) (Herpesvirus entry mediator C) (HveC) (Herpesvirus Ig-like receptor) (HIgR) (Nectin-1) (CD antigen CD111)
Q15223	PVRL1	202	4.085	R.LKGEAEYQEIRNPN*GTVTVISR.Y	2.628	0.64	826.435	3	QEIRNPNGTVTVI	4	Poliovirus receptor-related protein 1 (Herpes virus entry mediator C) (Herpesvirus entry mediator C) (HveC) (Herpesvirus Ig-like receptor) (HIgR) (Nectin-1) (CD antigen CD111)
Q92692	PVRL2	137	1000	K.QSTGQDTEAELQDATLALHGLTVEDEGN*YTCEFATFPK.G	3.615	1.15	1048.23	4	TVEDEGNYTCEFA	2	Poliovirus receptor-related protein 2 (Herpes virus entry mediator B) (Herpesvirus entry mediator B) (HveB) (Nectin-2) (CD antigen CD112)
C9J795	PVRL3	78	13.378	R.VLFKN*YSLNDATITLHNIGFSDSGK.Y	2.814	0.04	690.105	4	GRVLFKNYSLNDA	3	Poliovirus receptor-related protein 3 (Fragment)
H7C4L0	PVRL3	232	12.715	R.LDGQWPDGLLASDNTLHFVHPLTFN*YSGVYICK.V	3.711	-0.12	945.962	4	VHPLTFNYSGVYI	3	Poliovirus receptor-related protein 3 (Fragment)
Q6ZRP7	QSOX2	266	3.63	K.LGVSSVPSCYLIYPN*GSHGLINVVKPLR.A	4.129	0.46	761.414	4	CYLIYPNGSHGLI	1	Sulfhydryl oxidase 2 (EC 1.8.3.2) (Neuroblastoma-derived sulfhydryl oxidase) (Quiescin Q6-like protein 1)
C9JAK3	RAET1G	82	1000	K.KLN*VTTAWK.A	2.299	-0.16	532.305	2	PLGKKLNVTTAWK	1	Retinoic acid early transcript 1G protein
Q5VY80	RAET1L	68	1000	K.TFLHYDCGN*KTVTPVSPLGK.K	2.762	-0.16	560.034	4	LHYDCGNKTVTPV	3	Retinoic acid early transcript 1L protein
Q15293	RCN1	53	1000	R.VVRPDSELGERPPEDN*QSFQYDHEAFLGKEDSK.T	3.396	1.35	765.162	5	ERPPEDNQSFQYD	4	Reticulocalbin-1
O95980	RECK	200	0	K.AVENYCASISPQLIHCVNN*YTQSYPM^R.N	2.93	1.54	1078.82	3	LIHCVNNYTQSYP	4	Reversion-inducing cysteine-rich protein with Kazal motifs (hRECK) (Suppressor of tumorigenicity 15 protein)
O95980	RECK	352	0	R.N*LTYCTNFNNRPTELFR.S	2.504	1.24	1082.01	2	CQLGCRNLTYCTN	3	Reversion-inducing cysteine-rich protein with Kazal motifs (hRECK) (Suppressor of tumorigenicity 15 protein)
Q9Y644	RFNG	113	30.835	R.VINTN*CSAVR.T	2.33	0.53	568.785	2	DRVINTNCSAVRT	1	Beta-1,3-N-acetylglucosaminyltransferase radical fringe (EC 2.4.1.222) (O-fucosylpeptide 3-beta-N-acetylglucosaminyltransferase)
F8WCD0	RNF149	131	115.01	R.RN*ASAVVLYNEER.Y	3.178	-1.1	762.388	2	LVAARRNASAVVL	1	E3 ubiquitin-protein ligase RNF149
Q01973	ROR1	315	1000	K.CYN*STGVDYR.G	1.85	0.06	619.256	2	KNHKCYNSTGVDY	1	Tyrosine-protein kinase transmembrane receptor ROR1 (EC 2.7.10.1) (Neurotrophic tyrosine kinase, receptor-related 1)
H7C0V4	RTN4R	199	23.956	R.DLGN*LTHLFLHGNR.I	2.32	-0.4	403.214	4	TFRDLGNLTHLFL	1	Reticulon-4 receptor (Fragment)
O95136	S1PR2	19	1000	K.VQEHYN*YTK.E	2.7	-0.36	395.52	3	KVQEHYNYTKETL	3	Sphingosine 1-phosphate receptor 2 (S1P receptor 2) (S1P2) (Endothelial differentiation G-protein coupled receptor 5) (Sphingosine 1-phosphate receptor Edg-5) (S1P receptor Edg-5)
F8W921	SCAP	386	1000	R.HWPTLFSYYN*ITLAK.R	3.63	0.32	928.977	2	TLFSYYNITLAKR	2	Sterol regulatory element-binding protein cleavage-activating protein
Q6AZY7	SCARA3	115	19.843	K.ALNN*CSFCHEAGQLGPEIR.K	4.256	-0.04	725.998	3	DPKALNNCSFCHE	1	Scavenger receptor class A member 3 (Cellular stress response gene protein)
Q6AZY7	SCARA3	257	1000	K.IVTDWQN*YTR.L	1.748	-1.52	649.816	2	IVTDWQNYTRLFS	2	Scavenger receptor class A member 3 (Cellular stress response gene protein)
Q6AZY7	SCARA3	400	1000	R.LSCTLGFHTHAEELYYLN*K.S	3.1	0.04	575.529	4	EELYYLNKSVSIM	1	Scavenger receptor class A member 3 (Cellular stress response gene protein)
B3KW46	SCARB1	61	97.748	R.HKSN*ITFNNN*DTVSFLEYR.T	5.724	1.09	1153.05	2	EFRHKSNITFNNN	1	Scavenger receptor class B member 1 (cDNA FLJ42118 fis, clone TESTI2005610, highly similar to Scavenger receptor class B member 1)
B3KW46	SCARB1	67	17.009	R.HKSN*ITFNNN*DTVSFLEYR.T	3.744	0.47	769.034	3	NITFNNNDTVSFL	2	Scavenger receptor class B member 1 (cDNA FLJ42118 fis, clone TESTI2005610, highly similar to Scavenger receptor class B member 1)
D6RDG0	SCARB2	45	1000	R.N*GTEAFDSWEKPPLPVYTQFYFFN*VTN*PEEILRGETPR.V	4.845	9.08	1500.07	3	KKIVLRNGTEAFD	1	Lysosome membrane protein 2
D6RDG0	SCARB2	68	1000	R.N*GTEAFDSWEKPPLPVYTQFYFFN*VTN*PEEILRGETPR.V	4.845	9.08	1500.07	3	TQFYFFNVTNPEE	1	Lysosome membrane protein 2
Q14108	SCARB2	105	4.16	K.ANIQFGDN*GTTISAVSNK.A	2.516	0.03	613.971	3	NIQFGDNGTTISA	15	Lysosome membrane protein 2 (85 kDa lysosomal membrane sialoglycoprotein) (LGP85) (CD36 antigen-like 2) (Lysosome membrane protein II) (LIMP II) (Scavenger receptor class B member 2) (CD antigen CD36)
Q14108	SCARB2	304	1.488	R.YKVPAEILAN*TSDNAGFCIPEGNCLGSGVLN*VSICK.N	3.732	-0.47	969.217	4	PAEILANTSDNAG	8	Lysosome membrane protein 2 (85 kDa lysosomal membrane sialoglycoprotein) (LGP85) (CD36 antigen-like 2) (Lysosome membrane protein II) (LIMP II) (Scavenger receptor class B member 2) (CD antigen CD36)
Q14108	SCARB2	325	48.998	R.YKVPAEILAN*TSDNAGFCIPEGNCLGSGVLN*VSICK.N	3.732	-0.47	969.217	4	LGSGVLNVSICKN	8	Lysosome membrane protein 2 (85 kDa lysosomal membrane sialoglycoprotein) (LGP85) (CD36 antigen-like 2) (Lysosome membrane protein II) (LIMP II) (Scavenger receptor class B member 2) (CD antigen CD36)
Q96GP6	SCARF2	83	0.529	R.QQGDECGIAVCEGN*STCSENEVCVRPGECR.C	2.842	1.93	865.852	4	IAVCEGNSTCSEN	4	Scavenger receptor class F member 2 (SRECRP-1) (Scavenger receptor expressed by endothelial cells 2 protein) (SREC-II)
Q96GP6	SCARF2	310	1000	R.CLTCEPGWN*GTK.C	2.477	1.75	713.306	2	TCEPGWNGTKCDQ	5	Scavenger receptor class F member 2 (SRECRP-1) (Scavenger receptor expressed by endothelial cells 2 protein) (SREC-II)
Q96GP6	SCARF2	365	1000	K.CSN*GTYGEDCAFVCADCGSGHCDFQSGR.C	4.643	1.49	1059.72	3	CETKCSNGTYGED	7	Scavenger receptor class F member 2 (SRECRP-1) (Scavenger receptor expressed by endothelial cells 2 protein) (SREC-II)
Q96GP6	SCARF2	403	19.444	R.CLCSPGVHGPHCN*VTCPPGLHGADCAQACSCHEDTCDPVTGACHLETNQRK.G	2.859	0.32	965.569	6	VHGPHCNVTCPPG	2	Scavenger receptor class F member 2 (SRECRP-1) (Scavenger receptor expressed by endothelial cells 2 protein) (SREC-II)
F8W6X9	SDK1	782	1000	R.TN*QSIMVQWQPPPETEHN*GVLR.G	2.946	0.4	856.416	3	VASGRTNQSIMVQ	2	Protein sidekick-1
F8W6X9	SDK1	798	1000	R.TN*QSIMVQWQPPPETEHN*GVLR.G	2.946	0.4	856.416	3	PPETEHNGVLRGY	2	Protein sidekick-1
F8W6X9	SDK1	1024	1000	R.LTHTLN*STTHEYK.I	1.982	-0.2	387.695	4	RLTHTLNSTTHEY	2	Protein sidekick-1
F8W6X9	SDK1	1333	1000	R.GN*HTQSALLAGLR.K	3.148	-0.73	447.577	3	SHIVRGNHTQSAL	1	Protein sidekick-1
F8W6X9	SDK1	1873	1000	R.TITYGPELQAN*ITAGPAEGSPGSPR.D	3.327	0.98	829.747	3	GPELQANITAGPA	1	Protein sidekick-1
H7C2P2	SDK2	124	1000	R.VTHYLPN*VTLEYR.V	3.231	0.16	536.615	3	VTHYLPNVTLEYR	2	Protein sidekick-2 (Fragment)
H7C2P2	SDK2	278	1000	K.IQTLQAPPDMAPAN*VSLR.T	2.986	1.94	642.341	3	PDMAPANVSLRTA	6	Protein sidekick-2 (Fragment)
H7C2P2	SDK2	381	1000	R.ESVPSSGPTN*VSALATTSSSM^LVR.W	3.045	0.9	799.729	3	PSSGPTNVSALAT	7	Protein sidekick-2 (Fragment)
H7C2P2	SDK2	432	1000	R.FWLVEGN*SSR.S	2.218	-0.04	599.293	2	FWLVEGNSSRSAQ	1	Protein sidekick-2 (Fragment)
H7C2P2	SDK2	517	3.696	R.LN*TTTANTATVEVLAPSAR.Q	2.415	0.55	967.01	2	QITHRLNTTTANT	1	Protein sidekick-2 (Fragment)
Q58EX2	SDK2	551	1000	R.IRLDRN*GSLHISQTWSGDIGTYTCR.V	2.802	0.35	728.111	4	RIRLDRNGSLHIS	2	Protein sidekick-2
Q58EX2	SDK2	609	49.59	R.AIN*LTWTKPFDGNSPLIR.Y	2.356	0.42	1023.55	2	VERRAINLTWTKP	4	Protein sidekick-2
H7C2P2	SDK2	633	1000	R.WALHSASVSHN*ASSFIVDR.L	2.436	0.29	522.51	4	SASVSHNASSFIV	3	Protein sidekick-2 (Fragment)
Q58EX2	SDK2	704	1000	R.TN*QSIMIQWQPPPESHQN*GILK.G	2.492	0.57	851.425	3	IASGRTNQSIMIQ	4	Protein sidekick-2
Q58EX2	SDK2	804	1.04	K.VTEWTLQGVPTVPPGNVHAEATN*STTIR.F	2.93	0.28	993.509	3	VHAEATNSTTIRF	5	Protein sidekick-2
H7C2P2	SDK2	846	22.855	K.LKN*LTGYTAYMVSVAAFNAAGDGPR.S	2.7	0.34	864.1	3	NSVKLKNLTGYTA	2	Protein sidekick-2 (Fragment)
H7C2P2	SDK2	972	1000	K.TFTYGPEIEAN*VTTGPGEGAPGPPGVPIIVR.Y	3.481	0.24	1032.86	3	GPEIEANVTTGPG	3	Protein sidekick-2 (Fragment)
H0YMZ3	SEMA4B	129	1000	R.KIN*SSLQLPDR.V	2.452	0.28	637.354	2	ARERKINSSLQLP	1	Semaphorin-4B (Fragment)
C9J4M7	SEMA4C	106	0	K.GKNN*QTECFNFIR.F	2.366	0.03	544.256	3	IQKGKNNQTECFN	1	Semaphorin-4C (Fragment)
C9J4M7	SEMA4C	121	1000	R.FLQPYN*ASHLYVCGTYAFQPK.C	3.113	0	836.403	3	RFLQPYNASHLYV	4	Semaphorin-4C (Fragment)
Q9C0C4	SEMA4C	522	1000	R.DPYCAWSVN*TSR.C	2.842	-0.49	729.813	2	YCAWSVNTSRCVA	1	Semaphorin-4C
O95754	SEMA4F	509	53.534	R.TEVTQVN*TTNCGR.L	3.747	-0.12	741.841	2	TEVTQVNTTNCGR	1	Semaphorin-4F (Semaphorin-M) (Sema M) (Semaphorin-W) (Sema W)
I3L4N7	SERPINF1	83	1000	K.VTQN*LTLIEESLTSEFIHDIDRELK.T	2.896	-0.03	737.385	4	PLKVTQNLTLIEE	4	Pigment epithelium-derived factor (Fragment)
H3BN26	SEZ6L2	45	1000	R.IVSPEPGGAVGPN*LTCR.W	2.828	1.78	863.939	2	GGAVGPNLTCRWV	2	Seizure 6-like protein 2 (Fragment)
Q6UXD5	SEZ6L2	247	1000	R.LLAN*SSMLGEGQVLR.S	4.154	-0.69	795.923	2	APRLLANSSMLGE	1	Seizure 6-like protein 2
B7Z635	SGCB	141	45.026	R.ITSN*ATSDLNIK.V	2.665	-0.47	640.335	2	TERITSNATSDLN	1	Beta-sarcoglycan (cDNA FLJ57888, highly similar to Beta-sarcoglycan)
Q9HAT2	SIAE	401	1000	R.ALAYGEKN*LTFEGPLPEKIELLAHK.G	3.555	0.04	557.707	5	LAYGEKNLTFEGP	2	Sialate O-acetylesterase (EC 3.1.1.53) (H-Lse) (Sialic acid-specific 9-O-acetylesterase)
C9JBG5	SIDT2	54	9.394	R.TYVDEVNSELVNIYTFN*HTVTR.N	2.838	-1.29	873.093	3	VNIYTFNHTVTRN	1	SID1 transmembrane family member 2 (SID1 transmembrane family, member 2, isoform CRA_a)
C9JBG5	SIDT2	165	1000	R.TGEQFSFN*TTAAQPQYFK.Y	2.334	-0.46	689.989	3	GEQFSFNTTAAQP	4	SID1 transmembrane family member 2 (SID1 transmembrane family, member 2, isoform CRA_a)
P78324	SIRPA	110	1000	R.IGN*ITPADAGTYYCVK.F	3.32	0.52	873.419	2	FSIRIGNITPADA	1	Tyrosine-protein phosphatase non-receptor type substrate 1 (SHP substrate 1) (SHPS-1) (Brain Ig-like molecule with tyrosine-based activation motifs) (Bit) (CD172 antigen-like family member A) (Inhibitory receptor SHPS-1) (Macrophage fusion receptor) (MyD-1 antigen) (Signal-regulatory protein alpha-1) (Sirp-alpha-1) (Signal-regulatory protein alpha-2) (Sirp-alpha-2) (Signal-regulatory protein alph…
H3BQ21	SIRPB1	82	1000	R.GTAN*LSETIR.V	2.967	-1.33	532.776	2	PLRGTANLSETIR	1	Signal-regulatory protein beta-1 isoform 3 (Fragment)
H3BQ21	SIRPB1	107	2.806	R.VPPTLEVTQQPVRAENQVN*VTCQVR.K	3.81	1.11	955.832	3	RAENQVNVTCQVR	9	Signal-regulatory protein beta-1 isoform 3 (Fragment)
F8W1P7	SLC11A2	257	91.069	K.TNEQVVEVCTN*TSSPHAGLFPK.D	4.293	-0.07	806.721	3	VVEVCTNTSSPHA	1	Natural resistance-associated macrophage protein 2
F8W1P7	SLC11A2	270	1000	K.DN*STLAVDIYK.G	1.768	-0.67	621.311	2	GLFPKDNSTLAVD	2	Natural resistance-associated macrophage protein 2
B3KXX3	SLC12A6	210	9.34	K.TKEINN*MTVPSK.L	2.632	-1.21	682.852	2	KTKEINNMTVPSK	1	Solute carrier family 12 member 6 (cDNA FLJ46254 fis, clone TESTI4023096, highly similar to Solute carrier family 12 member 6)
Q9BXP2	SLC12A9	228	1000	R.LTPRPGPN*GSSLPPR.F	1.896	-0.22	516.951	3	TPRPGPNGSSLPP	3	Solute carrier family 12 member 9 (Cation-chloride cotransporter 6) (hCCC6) (Cation-chloride cotransporter-interacting protein 1) (CCC-interacting protein 1) (hCIP1) (Potassium-chloride transporter 9) (WO3.3)
Q9BXP2	SLC12A9	243	1000	R.FGHFTGFN*SSTLK.D	2.75	0	482.57	3	GHFTGFNSSTLKD	3	Solute carrier family 12 member 9 (Cation-chloride cotransporter 6) (hCCC6) (Cation-chloride cotransporter-interacting protein 1) (CCC-interacting protein 1) (hCIP1) (Potassium-chloride transporter 9) (WO3.3)
H7BYB7	SLC15A4	86	1000	R.LLN*CTAPGPDAAAR.C	3.466	0.98	715.354	2	GSARLLNCTAPGP	1	Solute carrier family 15 member 4 (Fragment)
B4DFF2	SLC17A5	95	1000	K.ACPEHSAPIKVHHN*QTGK.K	1.997	0.14	504.251	4	PIKVHHNQTGKKY	3	Sialin (cDNA FLJ57875, highly similar to Sialin)
P43003	SLC1A3	206	74.376	K.VPIQAN*ETLVGAVINN*VSEAMETLTR.I	5.828	0.78	925.813	3	KVPIQANETLVGA	1	Excitatory amino acid transporter 1 (Sodium-dependent glutamate/aspartate transporter 1) (GLAST-1) (Solute carrier family 1 member 3)
P43003	SLC1A3	216	6.591	K.VPIQAN*ETLVGAVINN*VSEAMETLTR.I	5.828	0.78	925.813	3	VGAVINNVSEAME	1	Excitatory amino acid transporter 1 (Sodium-dependent glutamate/aspartate transporter 1) (GLAST-1) (Solute carrier family 1 member 3)
P43007	SLC1A4	201	1000	R.TYATDYKVVTQN*SSSGN*VTHEK.I	2.636	0.09	609.539	4	YKVVTQNSSSGNV	4	Neutral amino acid transporter A (Alanine/serine/cysteine/threonine transporter 1) (ASCT-1) (SATT) (Solute carrier family 1 member 4)
P43007	SLC1A4	206	1000	R.TYATDYKVVTQN*SSSGN*VTHEK.I	2.636	0.09	609.539	4	QNSSSGNVTHEKI	4	Neutral amino acid transporter A (Alanine/serine/cysteine/threonine transporter 1) (ASCT-1) (SATT) (Solute carrier family 1 member 4)
M0QX44	SLC1A5	53	1000	R.SYSTTYEERN*ITGTR.V	1.948	0.32	594.28	3	TTYEERNITGTRV	5	Neutral amino acid transporter B(0) (Fragment)
F8WCC9	SLC22A5	57	1000	R.CRVPDAAN*LSSAWR.N	2.543	-0.94	535.927	3	RVPDAANLSSAWR	1	Solute carrier family 22 member 5
Q9UGH3	SLC23A2	188	1000	K.CN*TTDVSVAN*GTAELLHTEHIWYPR.I	3.321	1.41	723.343	4	LDKWKCNTTDVSV	2	Solute carrier family 23 member 2 (Na(+)/L-ascorbic acid transporter 2) (Nucleobase transporter-like 1 protein) (Sodium-dependent vitamin C transporter 2) (hSVCT2) (Yolk sac permease-like molecule 2)
Q9UGH3	SLC23A2	196	1000	K.CN*TTDVSVAN*GTAELLHTEHIWYPR.I	3.321	1.41	723.343	4	TDVSVANGTAELL	2	Solute carrier family 23 member 2 (Na(+)/L-ascorbic acid transporter 2) (Nucleobase transporter-like 1 protein) (Sodium-dependent vitamin C transporter 2) (hSVCT2) (Yolk sac permease-like molecule 2)
P50443	SLC26A2	357	0	K.LHENYN*SSIAGHIPTGFMPPK.V	2.113	0.27	771.712	3	KLHENYNSSIAGH	2	Sulfate transporter (Diastrophic dysplasia protein) (Solute carrier family 26 member 2)
A6NL68	SLC2A1	45	1000	K.VIEEFYN*QTWVHR.Y	3.786	0.27	862.42	2	VIEEFYNQTWVHR	2	Solute carrier family 2, facilitated glucose transporter member 1
Q96QE2	SLC2A13	433	1000	R.ITFKPIAPSGQN*ATCTR.Y	2.829	-0.58	622.32	3	IAPSGQNATCTRY	2	Proton myo-inositol cotransporter (H(+)-myo-inositol cotransporter) (Hmit) (H(+)-myo-inositol symporter) (Solute carrier family 2 member 13)
F8WDF8	SLC35A5	96	1000	R.GFHHDAFFSPSN*SCLLFR.T	2.92	0.3	536.249	4	AFFSPSNSCLLFR	2	Probable UDP-sugar transporter protein SLC35A5
Q9ULF5	SLC39A10	139	17.848	K.HFHSHNHQHSHN*HLNSEN*QTVTSVSTK.R	3.276	-6.81	788.357	4	NHLNSENQTVTSV	1	Zinc transporter ZIP10 (Solute carrier family 39 member 10) (Zrt- and Irt-like protein 10) (ZIP-10)
Q9ULF5	SLC39A10	191	11.73	R.LHHHLDHN*NTHHFHN*DSITPSERGEPSNEPSTETN*KTQEQSDVK.L	3.796	1.29	849.22	6	HHHLDHNNTHHFH	1	Zinc transporter ZIP10 (Solute carrier family 39 member 10) (Zrt- and Irt-like protein 10) (ZIP-10)
Q9ULF5	SLC39A10	198	9.779	R.LHHHLDHN*NTHHFHN*DSITPSER.G	3.498	-0.07	701.072	4	NTHHFHNDSITPS	2	Zinc transporter ZIP10 (Solute carrier family 39 member 10) (Zrt- and Irt-like protein 10) (ZIP-10)
Q9ULF5	SLC39A10	218	13.313	R.LHHHLDHN*NTHHFHN*DSITPSERGEPSNEPSTETN*KTQEQSDVK.L	3.779	1.96	1018.86	5	EPSTETNKTQEQS	1	Zinc transporter ZIP10 (Solute carrier family 39 member 10) (Zrt- and Irt-like protein 10) (ZIP-10)
Q9ULF5	SLC39A10	339	12.377	K.DLNEDDHHHECLN*VTQLLK.Y	3.739	0.38	584.023	4	HHHECLNVTQLLK	8	Zinc transporter ZIP10 (Solute carrier family 39 member 10) (Zrt- and Irt-like protein 10) (ZIP-10)
E5RFZ8	SLC39A14	77	21.314	K.ALLNHLDVGVGRGN*VTQHVQGHR.N	2.462	-0.45	620.833	4	VGVGRGNVTQHVQ	4	Zinc transporter ZIP14 (Fragment)
E5RIP4	SLC39A14	77	17.361	K.ALLNHLDVGVGRGN*VTQHVQGHRN*LSTCFSSGDLFTAHN*FSEQSR.I	3.795	0.86	829.57	6	VGVGRGNVTQHVQ	4	Zinc transporter ZIP14 (Fragment)
E5RIP4	SLC39A14	87	23.062	K.ALLNHLDVGVGRGN*VTQHVQGHRN*LSTCFSSGDLFTAHN*FSEQSR.I	3.795	0.86	829.57	6	HVQGHRNLSTCFS	4	Zinc transporter ZIP14 (Fragment)
E5RIP4	SLC39A14	102	52.269	K.ALLNHLDVGVGRGN*VTQHVQGHRN*LSTCFSSGDLFTAHN*FSEQSR.I	3.795	0.86	829.57	6	DLFTAHNFSEQSR	4	Zinc transporter ZIP14 (Fragment)
Q13433	SLC39A6	67	1000	R.YGEN*N*SLSVEGFRK.L	2.688	-0.02	535.922	3	FYRYGENNSLSVE	1	Zinc transporter ZIP6 (Estrogen-regulated protein LIV-1) (Solute carrier family 39 member 6) (Zrt- and Irt-like protein 6) (ZIP-6)
Q13433	SLC39A6	68	1000	R.YGEN*N*SLSVEGFRK.L	2.688	-0.02	535.922	3	YRYGENNSLSVEG	1	Zinc transporter ZIP6 (Estrogen-regulated protein LIV-1) (Solute carrier family 39 member 6) (Zrt- and Irt-like protein 6) (ZIP-6)
Q13433	SLC39A6	241	1000	R.KTN*ESVSEPR.K	1.933	1.17	383.86	3	LAGRKTNESVSEP	3	Zinc transporter ZIP6 (Estrogen-regulated protein LIV-1) (Solute carrier family 39 member 6) (Zrt- and Irt-like protein 6) (ZIP-6)
Q13433	SLC39A6	266	71.753	R.NTN*ENPQECFN*ASK.L	2.989	0.27	829.841	2	NPQECFNASKLLT	1	Zinc transporter ZIP6 (Estrogen-regulated protein LIV-1) (Solute carrier family 39 member 6) (Zrt- and Irt-like protein 6) (ZIP-6)
F5GZS6	SLC3A2	334	85.988	R.DIENLKDASSFLAEWQN*ITK.G	4.147	0.59	582.043	4	FLAEWQNITKGFS	5	4F2 cell-surface antigen heavy chain
F5GZS6	SLC3A2	350	10.419	K.GFSEDRLLIAGTN*SSDLQQILSLLESNKDLLLTSSYLSDSGSTGEHTK.S	4.162	-1.25	1029.52	5	LLIAGTNSSDLQQ	6	4F2 cell-surface antigen heavy chain
F5GZS6	SLC3A2	393	59.298	K.SLVTQYLN*ATGNR.W	2.696	-0.04	720.372	2	LVTQYLNATGNRW	3	4F2 cell-surface antigen heavy chain
Q8WWI5	SLC44A1	135	52.255	K.FAEIN*GSALCSYNLKPSEYTTSPK.S	3.442	-0.19	894.095	3	QKFAEINGSALCS	2	Choline transporter-like protein 1 (CDw92) (Solute carrier family 44 member 1) (CD antigen CD92)
Q8WWI5	SLC44A1	180	1000	R.CAPVN*ISCYAK.F	2.337	0.15	643.294	2	HRCAPVNISCYAK	1	Choline transporter-like protein 1 (CDw92) (Solute carrier family 44 member 1) (CD antigen CD92)
K7ESF5	SLC44A2	132	1000	K.GVLM^VGN*ETTYEDGHGSRKN*ITDLVEGAK.K	3.498	-0.11	623.303	5	GVLMVGNETTYED	2	Choline transporter-like protein 2 (Fragment)
K7ESF5	SLC44A2	145	1000	R.KN*ITDLVEGAKK.A	3.817	0.1	440.254	3	GHGSRKNITDLVE	1	Choline transporter-like protein 2 (Fragment)
Q8IWA5	SLC44A2	417	58.551	K.TCNPETFPSSN*ESR.Q	2.865	-1.05	814.84	2	ETFPSSNESRQCP	2	Choline transporter-like protein 2 (Solute carrier family 44 member 2)
B7Z473	SLC44A5	286	1000	K.VIAPGGHCIHEN*QTCDPEIFN*TTEIAK.A	3.188	-0.11	765.107	4	GHCIHENQTCDPE	2	Choline transporter-like protein 5 (cDNA FLJ60667, highly similar to Choline transporter-like protein 5)
B7Z473	SLC44A5	295	1000	K.VIAPGGHCIHEN*QTCDPEIFN*TTEIAK.A	3.188	-0.11	765.107	4	CDPEIFNTTEIAK	2	Choline transporter-like protein 5 (cDNA FLJ60667, highly similar to Choline transporter-like protein 5)
C9JSZ2	SLC46A1	58	1000	R.FSADLGYN*GTR.Q	2.473	-0.1	602.28	2	SADLGYNGTRQRG	3	Proton-coupled folate transporter
C9JRP1	SLC4A7	672	7.971	K.LTSYSCVCTEPPNPSN*ETLAQWKK.D	3.78	0.72	938.439	3	EPPNPSNETLAQW	2	Sodium bicarbonate cotransporter 3 (Fragment)
C9JRP1	SLC4A7	682	1000	K.KDN*ITAHN*ISWR.N	1.937	-0.04	365.937	4	AQWKKDNITAHNI	1	Sodium bicarbonate cotransporter 3 (Fragment)
C9JRP1	SLC4A7	687	1000	K.KDN*ITAHN*ISWR.N	1.937	-0.04	365.937	4	DNITAHNISWRNL	1	Sodium bicarbonate cotransporter 3 (Fragment)
C9JRP1	SLC4A7	692	1000	R.N*LTVSECKK.L	1.839	0.1	361.186	3	HNISWRNLTVSEC	2	Sodium bicarbonate cotransporter 3 (Fragment)
Q9H2J7	SLC6A15	187	1000	K.N*ASHTFVEPECEQSSATTYYWYR.E	4.125	0.53	943.738	3	QCPLVKNASHTFV	2	Sodium-dependent neutral amino acid transporter B(0)AT2 (Sodium- and chloride-dependent neurotransmitter transporter NTT73) (Sodium-coupled branched-chain amino-acid transporter 1) (Solute carrier family 6 member 15) (Transporter v7-3)
P30825	SLC7A1	226	101.329	K.NWQLTEEDFGN*TSGR.L	3.591	-0.22	878.886	2	TEEDFGNTSGRLC	3	High affinity cationic amino acid transporter 1 (CAT-1) (CAT1) (Ecotropic retroviral leukemia receptor homolog) (Ecotropic retrovirus receptor homolog) (ERR) (Solute carrier family 7 member 1) (System Y+ basic amino acid transporter)
P30825	SLC7A1	235	0	R.LCLNN*DTK.E	2.356	0.31	490.734	2	GRLCLNNDTKEGK	1	High affinity cationic amino acid transporter 1 (CAT-1) (CAT1) (Ecotropic retroviral leukemia receptor homolog) (Ecotropic retrovirus receptor homolog) (ERR) (Solute carrier family 7 member 1) (System Y+ basic amino acid transporter)
P52569	SLC7A2	227	1000	K.ISEEFLKN*ISASAR.E	3.113	-0.49	523.278	3	SEEFLKNISASAR	1	Low affinity cationic amino acid transporter 2 (CAT-2) (CAT2) (Solute carrier family 7 member 2)
O94813	SLIT2	63	48.874	R.LDLN*GNN*ITR.I	2.142	0.36	568.29	2	TERLDLNGNNITR	2	Slit homolog 2 protein (Slit-2) [Cleaved into: Slit homolog 2 protein N-product; Slit homolog 2 protein C-product]
O94813	SLIT2	66	9.34	R.LDLNGNN*ITR.I	3.587	0.09	566.796	2	LDLNGNNITRITK	1	Slit homolog 2 protein (Slit-2) [Cleaved into: Slit homolog 2 protein N-product; Slit homolog 2 protein C-product]
O94813	SLIT2	186	17.009	R.ALRDLEVLTLNNNN*ITR.L	3.141	-1.78	658.027	3	LTLNNNNITRLSV	1	Slit homolog 2 protein (Slit-2) [Cleaved into: Slit homolog 2 protein N-product; Slit homolog 2 protein C-product]
O94813	SLIT2	623	1000	R.ITCVGN*DSFIGLSSVR.L	3.588	1.86	864.431	2	RITCVGNDSFIGL	3	Slit homolog 2 protein (Slit-2) [Cleaved into: Slit homolog 2 protein N-product; Slit homolog 2 protein C-product]
O94813	SLIT2	794	101.284	R.ISTLSN*QSFSN*MTQLLTLILSYNR.L	4.481	-2.15	1375.7	2	RISTLSNQSFSNM	1	Slit homolog 2 protein (Slit-2) [Cleaved into: Slit homolog 2 protein N-product; Slit homolog 2 protein C-product]
O94813	SLIT2	799	87.582	R.ISTLSN*QSFSN*MTQLLTLILSYNR.L	4.481	-2.15	1375.7	2	SNQSFSNMTQLLT	1	Slit homolog 2 protein (Slit-2) [Cleaved into: Slit homolog 2 protein N-product; Slit homolog 2 protein C-product]
O94813	SLIT2	1300	1000	R.QAPGQN*GTSFHGCIR.N	2.144	0.1	544.919	3	RQAPGQNGTSFHG	2	Slit homolog 2 protein (Slit-2) [Cleaved into: Slit homolog 2 protein N-product; Slit homolog 2 protein C-product]
Q99835	SMO	76	1000	R.AAPCEPLRYN*VCLGSVLPYGATSTLLAGDSDSQEEAHGK.L	3.611	0.47	1034.99	4	CEPLRYNVCLGSV	1	Smoothened homolog (SMO) (Protein Gx)
Q99835	SMO	188	1.383	R.CTPDRFPEGCTNEVQNIKFN*SSGQCEVPLVR.T	4.326	-2.24	911.17	4	VQNIKFNSSGQCE	2	Smoothened homolog (SMO) (Protein Gx)
Q5T0Y8	SMPDL3B	194	48.998	K.NQFPAGSNNIYNQIAELWKPWLSN*ESIALFK.K	4.14	-0.4	1199.27	3	WKPWLSNESIALF	1	Acid sphingomyelinase-like phosphodiesterase 3b (Fragment)
E9PP43	SORL1	74	1000	R.SDEYN*CSSGMCIR.S	3.223	0.61	791.297	2	CRSDEYNCSSGMC	3	Sortilin-related receptor
Q92673	SORL1	99	2.017	K.VYGQVSLN*DSHNQMVVHWAGEK.S	2.612	-1.38	834.396	3	YGQVSLNDSHNQM	1	Sortilin-related receptor (Low-density lipoprotein receptor relative with 11 ligand-binding repeats) (LDLR relative with 11 ligand-binding repeats) (LR11) (SorLA-1) (Sorting protein-related receptor containing LDLR class A repeats) (SorLA)
E9PP43	SORL1	156	1000	R.CPN*GTCIPSSK.H	2.98	0.43	612.268	2	NGFRCPNGTCIPS	2	Sortilin-related receptor
Q92673	SORL1	158	8.4	K.ISDKLNFGLGN*RSEAVIAQFYHSPADNKR.Y	3.078	-0.05	650.936	5	LNFGLGNRSEAVI	2	Sortilin-related receptor (Low-density lipoprotein receptor relative with 11 ligand-binding repeats) (LDLR relative with 11 ligand-binding repeats) (LR11) (SorLA-1) (Sorting protein-related receptor containing LDLR class A repeats) (SorLA)
E9PKB0	SORL1	601	34.206	K.SRN*STVEYTLNKLEPGGK.Y	3.834	-0.53	666.012	3	YKVKSRNSTVEYT	2	Sortilin-related receptor
E9PKB0	SORL1	707	1000	K.MGHN*YTFTVQAR.C	2.625	-0.21	476.559	3	NLKMGHNYTFTVQ	3	Sortilin-related receptor
Q99523	SORT1	98	0	K.LAN*NTHQHVFDDLR.G	3.566	0.14	841.91	2	FVAKLANNTHQHV	2	Sortilin (100 kDa NT receptor) (Glycoprotein 95) (Gp95) (Neurotensin receptor 3) (NT3) (NTR3)
Q99523	SORT1	162	9.34	K.DITDLIN*NTFIR.T	2.476	0.77	719.378	2	DITDLINNTFIRT	4	Sortilin (100 kDa NT receptor) (Glycoprotein 95) (Gp95) (Neurotensin receptor 3) (NT3) (NTR3)
Q99523	SORT1	456	13.38	K.NKN*ECSLHIHASYSISQK.L	4.313	0	530.509	4	ATAKNKNECSLHI	1	Sortilin (100 kDa NT receptor) (Glycoprotein 95) (Gp95) (Neurotensin receptor 3) (NT3) (NTR3)
Q99523	SORT1	684	1000	K.QPSICLCSLEDFLCDFGYYRPEN*DSK.C	3.383	2.5	1072.8	3	GYYRPENDSKCVE	2	Sortilin (100 kDa NT receptor) (Glycoprotein 95) (Gp95) (Neurotensin receptor 3) (NT3) (NTR3)
E5RK62	SPARC	25	11.015	K.VCSNDN*KTFDSSCHFFATK.C	3.339	2.5	756.659	3	KVCSNDNKTFDSS	2	SPARC (Fragment)
H0YNA7	SPPL2A	74	5.75	K.GGAEAM^LVVN*NSVLFPPSGN*RSEFPDVK.I	3.468	0.25	985.151	3	EAMLVVNNSVLFP	3	Signal peptide peptidase-like 2A (Fragment)
H0YNA7	SPPL2A	84	36.684	K.GGAEAM^LVVN*NSVLFPPSGN*RSEFPDVK.I	3.468	0.25	985.151	3	LFPPSGNRSEFPD	3	Signal peptide peptidase-like 2A (Fragment)
H0YNA7	SPPL2A	107	1000	R.DM^N*QTLGDN*ITVK.M	2.961	0.79	735.842	2	KDFRDMNQTLGDN	6	Signal peptide peptidase-like 2A (Fragment)
H0YNA7	SPPL2A	113	1000	R.DM^N*QTLGDN*ITVK.M	2.961	0.79	735.842	2	NQTLGDNITVKMY	6	Signal peptide peptidase-like 2A (Fragment)
Q8TCT7	SPPL2B	97	1000	R.GN*CTFYEK.V	1.921	0.41	511.213	2	PLVARGNCTFYEK	1	Signal peptide peptidase-like 2B (SPP-like 2B) (SPPL2b) (EC 3.4.23.-) (Intramembrane protease 4) (IMP-4) (Presenilin homologous protein 4) (PSH4) (Presenilin-like protein 1)
E9PQI4	SSR2	104	1000	K.AGYFN*FTSATITYLAQEDGPVVIGSTSAPGQGGILAQR.E	3.763	0.71	965.987	4	LKAGYFNFTSATI	1	Translocon-associated protein subunit beta (Fragment)
E9PQZ2	ST3GAL4	131	33.19	R.LRN*SSLGDAINKYDVVIR.L	3.639	-1.01	679.372	3	NGHRLRNSSLGDA	2	CMP-N-acetylneuraminate-beta-galactosamide-alpha-2,3-sialyltransferase 4 (Fragment)
Q11206	ST3GAL4	310	1000	K.SMAGSGHN*VSQEALAIKR.M	2.688	-0.4	620.315	3	MAGSGHNVSQEAL	4	CMP-N-acetylneuraminate-beta-galactosamide-alpha-2,3-sialyltransferase 4 (Alpha 2,3-ST 4) (Beta-galactoside alpha-2,3-sialyltransferase 4) (EC 2.4.99.-) (Alpha 2,3-sialyltransferase IV) (Gal-NAc6S) (Gal-beta-1,4-GalNAc-alpha-2,3-sialyltransferase) (SAT-3) (ST-4) (ST3Gal IV) (ST3GalIV) (ST3GalA.2) (STZ) (Sialyltransferase 4C) (SIAT4-C)
Q11206	ST3GAL4	329	1000	R.MLEMGAIKN*LTSF.-	3.152	-0.07	729.367	2	EMGAIKNLTSF	1	CMP-N-acetylneuraminate-beta-galactosamide-alpha-2,3-sialyltransferase 4 (Alpha 2,3-ST 4) (Beta-galactoside alpha-2,3-sialyltransferase 4) (EC 2.4.99.-) (Alpha 2,3-sialyltransferase IV) (Gal-NAc6S) (Gal-beta-1,4-GalNAc-alpha-2,3-sialyltransferase) (SAT-3) (ST-4) (ST3Gal IV) (ST3GalIV) (ST3GalA.2) (STZ) (Sialyltransferase 4C) (SIAT4-C)
Q9Y274	ST3GAL6	308	11.721	K.NAYHN*VTAEQLFLKDIIEK.N	2.216	0.51	563.048	4	NKNAYHNVTAEQL	5	Type 2 lactosamine alpha-2,3-sialyltransferase (EC 2.4.99.-) (CMP-NeuAc:beta-galactoside alpha-2,3-sialyltransferase VI) (ST3Gal VI) (ST3GalVI) (Sialyltransferase 10)
Q8TCJ2	STT3B	627	6.591	R.TTLVDNNTWN*NSHIALVGK.A	2.827	-0.22	700.692	3	VDNNTWNNSHIAL	3	Dolichyl-diphosphooligosaccharide--protein glycosyltransferase subunit STT3B (Oligosaccharyl transferase subunit STT3B) (STT3-B) (EC 2.4.99.18) (Source of immunodominant MHC-associated peptides homolog)
O60279	SUSD5	354	27.005	K.VIYGNTDGPSGPFVGKN*DSK.A	2.376	-0.08	685.669	3	GPFVGKNDSKAGD	2	Sushi domain-containing protein 5
Q7L0J3	SV2A	498	52.255	R.VEHVTFN*FTLENQIHR.G	2.365	-0.04	497.503	4	VEHVTFNFTLENQ	5	Synaptic vesicle glycoprotein 2A
Q7L0J3	SV2A	573	42.869	R.LIN*STFLHNK.E	1.845	-0.24	397.22	3	VNSRLINSTFLHN	1	Synaptic vesicle glycoprotein 2A
C9JYN0	SYPL1	53	10.309	K.GQTEIQVNCPPAVTEN*KTVTATFGYPFR.L	2.977	0.11	1043.51	3	PPAVTENKTVTAT	8	Synaptophysin-like protein 1
C9JYN0	SYPL1	78	65.44	R.LNEASFQPPPGVN*ICDVNWK.D	4.706	0.71	1144.55	2	QPPPGVNICDVNW	1	Synaptophysin-like protein 1
Q96GX1	TCTN2	455	0	R.MNN*VTTLHLWQSAGR.G	2.696	0.14	865.93	2	NINRMNNVTTLHL	3	Tectonic-2
Q6NUS6	TCTN3	347	1000	K.VSVSLGQTN*LTVEPGASLQQHFILR.F	2.571	0.17	899.82	3	VSLGQTNLTVEPG	1	Tectonic-3
Q9P273	TENM3	380	6.591	K.LGGFTQEN*NTIDSGELDIGRR.A	2.662	0.16	765.708	3	GGFTQENNTIDSG	2	Teneurin-3 (Ten-3) (Protein Odd Oz/ten-m homolog 3) (Tenascin-M3) (Ten-m3) (Teneurin transmembrane protein 3)
Q9P273	TENM3	419	1000	K.FN*ISLQK.D	1.982	-0.04	426.739	2	PQFLKFNISLQKD	1	Teneurin-3 (Ten-3) (Protein Odd Oz/ten-m homolog 3) (Tenascin-M3) (Ten-m3) (Teneurin transmembrane protein 3)
G3V0E5	TFRC	170	1000	K.KDFEDLYTPVN*GSIVIVR.A	2.512	0.04	690.033	3	DLYTPVNGSIVIV	7	Transferrin receptor (P90, CD71), isoform CRA_c (Transferrin receptor protein 1, serum form)
F8W8W7	TGOLN2	39	1000	K.QEEAGVRPSAGN*VSTHPSLSQRPGGSTK.S	3.15	-0.09	710.106	4	VRPSAGNVSTHPS	1	Trans-Golgi network integral membrane protein 2
P07204	THBD	382	44.425	R.ANCEYQCQPLN*QTSYLCVCAEGFAPIPHEPHR.C	3.052	2.2	963.177	4	YQCQPLNQTSYLC	2	Thrombomodulin (TM) (Fetomodulin) (CD antigen CD141)
Q86XR7-2	TICAM2	103	1000	K.KQYDSFTFTASKN*GTYK.F	4.369	0.35	663.655	3	TFTASKNGTYKFC	1	TIR domain-containing adapter molecule 2 (TICAM-2) (Putative NF-kappa-B-activating protein 502) (TRIF-related adapter molecule) (Toll-like receptor adaptor protein 3) (Toll/interleukin-1 receptor domain-containing protein) (MyD88-4)
P01033	TIMP1	53	1000	K.FVGTPEVN*QTTLYQR.Y	3.587	-0.06	878.443	2	VGTPEVNQTTLYQ	2	Metalloproteinase inhibitor 1 (Erythroid-potentiating activity) (EPA) (Fibroblast collagenase inhibitor) (Collagenase inhibitor) (Tissue inhibitor of metalloproteinases 1) (TIMP-1)
P01033	TIMP1	101	1000	R.SHN*RSEEFLIAGK.L	2.509	0.58	745.878	2	YFHRSHNRSEEFL	2	Metalloproteinase inhibitor 1 (Erythroid-potentiating activity) (EPA) (Fibroblast collagenase inhibitor) (Collagenase inhibitor) (Tissue inhibitor of metalloproteinases 1) (TIMP-1)
J3KPA2	TM2D1	134	51.572	K.INDATQEPVN*CTN*YTAHVSCFPAPN*ITCK.D	4.551	-0.76	1111.16	3	ATQEPVNCTNYTA	3	TM2 domain containing 1, isoform CRA_c (TM2 domain-containing protein 1)
J3KPA2	TM2D1	137	53.775	K.INDATQEPVN*CTN*YTAHVSCFPAPN*ITCK.D	4.551	-0.76	1111.16	3	EPVNCTNYTAHVS	3	TM2 domain containing 1, isoform CRA_c (TM2 domain-containing protein 1)
J3KPA2	TM2D1	149	69.431	K.INDATQEPVN*CTN*YTAHVSCFPAPN*ITCK.D	4.551	-0.76	1111.16	3	SCFPAPNITCKDS	3	TM2 domain containing 1, isoform CRA_c (TM2 domain-containing protein 1)
B3KT51	TM2D3	22	1000	R.LPADCIDCTTN*FSCTYGKPVTFDCAVKPSVTCVDQDFK.S	4.408	-0.64	1105.74	4	CIDCTTNFSCTYG	6	TM2 domain containing 3, isoform CRA_a (TM2 domain-containing protein 3) (cDNA FLJ37636 fis, clone BRCOC2018775, highly similar to Homo sapiens TM2 domain containing 3 (TM2D3), transcript variant 1, mRNA)
B3KT51	TM2D3	57	65.089	K.NFIIN*MTCR.F	2.268	0.08	586.278	2	QKNFIINMTCRFC	1	TM2 domain containing 3, isoform CRA_a (TM2 domain-containing protein 3) (cDNA FLJ37636 fis, clone BRCOC2018775, highly similar to Homo sapiens TM2 domain containing 3 (TM2D3), transcript variant 1, mRNA)
B3KT51	TM2D3	92	1000	R.YPAN*CTVR.D	1.921	-0.12	492.229	2	RQRYPANCTVRDH	2	TM2 domain containing 3, isoform CRA_a (TM2 domain-containing protein 3) (cDNA FLJ37636 fis, clone BRCOC2018775, highly similar to Homo sapiens TM2 domain containing 3 (TM2D3), transcript variant 1, mRNA)
E9PJC4	TM9SF1	178	1000	R.IIFAN*VSVR.D	1.959	0.09	511.3	2	DRIIFANVSVRDV	3	Transmembrane 9 superfamily member 1 (Fragment)
Q5TB53	TM9SF3	130	1000	R.IVDVN*LTSEGKVK.L	2.106	0.68	702.896	2	NRIVDVNLTSEGK	5	Transmembrane 9 superfamily member 3 (Fragment)
F8W7F7	TMED4	117	1000	R.FTFTSHTPGDHQICLHSN*STR.M	2.3	0.29	490.028	5	QICLHSNSTRMAL	4	Transmembrane emp24 domain-containing protein 4
Q9BVK6	TMED9	125	1000	R.FTFTSHTPGEHQICLHSN*STK.F	2.178	0.23	487.23	5	QICLHSNSTKFSL	4	Transmembrane emp24 domain-containing protein 9 (GMP25) (Glycoprotein 25L2) (p24 family protein alpha-2) (p24alpha2) (p25)
C9JUY7	TMEM106C	115	1000	R.SEQLVN*FTGK.A	2.114	0.91	563.288	2	RSEQLVNFTGKAE	2	Transmembrane protein 106C
E9PB58	TMEM108	178	1000	R.KGAGN*SSRPVPPAPGGHSR.S	2.686	1.14	458.741	4	SRKGAGNSSRPVP	1	Transmembrane protein 108
A8MSY1	TMEM110-MUSTN1	7	1000	-.MQGPAGN*ASR.G	2.548	-4.29	496.227	2	MQGPAGNASRGLP	1	Protein TMEM110-MUSTN1
Q24JP5	TMEM132A	71	1000	R.VQQVGHYPPAN*SSLSSR.S	2.728	-0.39	610.639	3	GHYPPANSSLSSR	2	Transmembrane protein 132A (HSPA5-binding protein 1)
Q6IEE7	TMEM132E	70	1000	R.EARPPSPAVAN*SSLQR.S	3.604	1.36	561.629	3	PSPAVANSSLQRS	1	Transmembrane protein 132E
Q6IEE7	TMEM132E	91	1000	K.ELPVLN*VSLGPFSTSQVVAR.E	2.995	-1.26	706.055	3	KELPVLNVSLGPF	1	Transmembrane protein 132E
Q9P2C4	TMEM181	185	38.189	K.VIQTSAAN*FSLN*NSKK.L	3.177	0.81	864.452	2	IQTSAANFSLNNS	1	Transmembrane protein 181
Q9P2C4	TMEM181	189	9.34	K.VIQTSAAN*FSLN*NSKK.L	3.177	0.81	864.452	2	AANFSLNNSKKLK	1	Transmembrane protein 181
F5H6B2	TMEM2	292	1000	K.ILESERFDTHEYRN*ESR.R	2.098	0.95	1092.51	2	DTHEYRNESRRLQ	5	Transmembrane protein 2
F5H6B2	TMEM2	525	1000	K.N*FTSVHLSYVELK.H	1.569	0.09	513.936	3	HIMIMKNFTSVHL	2	Transmembrane protein 2
Q9H813	TMEM206	148	1000	K.HHYEVIPPLTSPGQPGDM^N*CTTQR.I	2.333	-0.75	689.317	4	GQPGDMNCTTQRI	4	Transmembrane protein 206
Q9H813	TMEM206	155	1000	R.IN*YTDPFSN*QTVK.S	3.646	-1	766.865	2	CTTQRINYTDPFS	1	Transmembrane protein 206
Q9H813	TMEM206	162	1000	R.IN*YTDPFSN*QTVK.S	3.646	-1	766.865	2	YTDPFSNQTVKSA	1	Transmembrane protein 206
Q9NWD8	TMEM248	132	1000	R.N*VTHLYSTILGHQIGLSGR.E	3.704	0.1	690.372	3	FGGYSRNVTHLYS	1	Transmembrane protein 248
Q9NV96	TMEM30A	107	1000	K.CLSPDVTPCFCTIN*FTLEK.S	3.011	3.92	1153.03	2	PCFCTINFTLEKS	2	Cell cycle control protein 50A (Transmembrane protein 30A)
Q9NV96	TMEM30A	176	36.572	R.RNEDKPIAPCGAIAN*SMFN*DTLELFLIGN*DSYPIPIALKK.K	4.398	-1.8	1114.57	4	PCGAIANSMFNDT	2	Cell cycle control protein 50A (Transmembrane protein 30A)
Q9NV96	TMEM30A	180	46.873	R.RNEDKPIAPCGAIAN*SMFN*DTLELFLIGN*DSYPIPIALKK.K	4.398	-1.8	1114.57	4	IANSMFNDTLELF	2	Cell cycle control protein 50A (Transmembrane protein 30A)
Q9NV96	TMEM30A	190	51.46	R.RNEDKPIAPCGAIAN*SMFN*DTLELFLIGN*DSYPIPIALKK.K	4.398	-1.8	1114.57	4	ELFLIGNDSYPIP	2	Cell cycle control protein 50A (Transmembrane protein 30A)
Q9NV96	TMEM30A	294	11.015	R.YSLN*VTYNYPVHYFDGRK.R	3.09	-0.33	1120.04	2	AGRYSLNVTYNYP	11	Cell cycle control protein 50A (Transmembrane protein 30A)
G3V1K2	TMEM5	52	1000	R.EHWQPQETN*ESLK.N	2.845	-0.32	814.875	2	WQPQETNESLKNY	1	Transmembrane protein 5 (Transmembrane protein 5, isoform CRA_a)
H7C0B3	TMEM87B	26	1000	K.TMFN*STDIK.L	2.561	0.06	530.249	2	FRKTMFNSTDIKL	1	Transmembrane protein 87B (Fragment)
H0Y5B2	TMEM8A	42	1000	R.GWSCTDN*STAQTVAQQR.A	2.54	-3.06	956.918	2	GWSCTDNSTAQTV	3	Transmembrane protein 8A (Fragment)
Q9HCN3	TMEM8A	140	1000	R.SN*ASVN*VSHPAPGDWFVAAHLPPSSQK.I	4.86	1.15	936.125	3	STTPRSNASVNVS	1	Transmembrane protein 8A (Protein M83) (Transmembrane protein 6) (Transmembrane protein 8)
Q9HCN3	TMEM8A	144	1000	R.SN*ASVN*VSHPAPGDWFVAAHLPPSSQK.I	4.86	1.15	936.125	3	RSNASVNVSHPAP	1	Transmembrane protein 8A (Protein M83) (Transmembrane protein 6) (Transmembrane protein 8)
Q9NQ34	TMEM9B	60	0	K.CICPPYKENSGHIYNKN*ISQK.D	3.725	1.16	851.743	3	GHIYNKNISQKDC	4	Transmembrane protein 9B
Q96JJ7	TMX3	258	1000	K.LVALAVIDEKN*TSVEHTR.L	2.055	-0.11	500.274	4	AVIDEKNTSVEHT	3	Protein disulfide-isomerase TMX3 (EC 5.3.4.1) (Thioredoxin domain-containing protein 10) (Thioredoxin-related transmembrane protein 3)
Q9Y6Q6	TNFRSF11A	105	1000	K.ALVAVVAGN*STTPR.R	2.194	-0.07	679.88	2	VAVVAGNSTTPRR	2	Tumor necrosis factor receptor superfamily member 11A (Osteoclast differentiation factor receptor) (ODFR) (Receptor activator of NF-KB) (CD antigen CD265)
Q13641	TPBG	166	33.237	R.QLDLSHNPLADLSPFAFSGSN*ASVSAPSPLVELILNHIVPPEDERQN*R.S	3.552	0.36	1040.33	5	FAFSGSNASVSAP	1	Trophoblast glycoprotein (5T4 oncofetal antigen) (5T4 oncofetal trophoblast glycoprotein) (5T4 oncotrophoblast glycoprotein) (M6P1)
Q13641	TPBG	192	10.144	R.QLDLSHNPLADLSPFAFSGSN*ASVSAPSPLVELILNHIVPPEDERQN*R.S	3.552	0.36	1040.33	5	PEDERQNRSFEGM	1	Trophoblast glycoprotein (5T4 oncofetal antigen) (5T4 oncofetal trophoblast glycoprotein) (5T4 oncotrophoblast glycoprotein) (M6P1)
Q13641	TPBG	243	6.591	R.HLDLSN*NSLVSLTYVSFRN*LTHLESLHLEDNALK.V	4.697	-2.1	975.502	4	RHLDLSNNSLVSL	1	Trophoblast glycoprotein (5T4 oncofetal antigen) (5T4 oncofetal trophoblast glycoprotein) (5T4 oncotrophoblast glycoprotein) (M6P1)
Q13641	TPBG	256	59.367	R.N*LTHLESLHLEDNALK.V	2.993	-0.24	617.323	3	TYVSFRNLTHLES	1	Trophoblast glycoprotein (5T4 oncofetal antigen) (5T4 oncofetal trophoblast glycoprotein) (5T4 oncotrophoblast glycoprotein) (M6P1)
Q13641	TPBG	275	1000	K.VLHN*GTLAELQGLPHIR.V	3.468	0.22	468.515	4	ALKVLHNGTLAEL	3	Trophoblast glycoprotein (5T4 oncofetal antigen) (5T4 oncofetal trophoblast glycoprotein) (5T4 oncotrophoblast glycoprotein) (M6P1)
O14773	TPP1	443	1000	K.FLSSSPHLPPSSYFN*ASGR.A	2.518	-0.05	685.334	3	PPSSYFNASGRAY	11	Tripeptidyl-peptidase 1 (TPP-1) (EC 3.4.14.9) (Cell growth-inhibiting gene 1 protein) (Lysosomal pepstatin-insensitive protease) (LPIC) (Tripeptidyl aminopeptidase) (Tripeptidyl-peptidase I) (TPP-I)
O95857	TSPAN13	137	17.009	R.SVNPN*DTCLASCVK.S	2.854	-1.19	784.352	2	FRSVNPNDTCLAS	3	Tetraspanin-13 (Tspan-13) (Tetraspan NET-6) (Transmembrane 4 superfamily member 13)
H7C285	TSPAN15	98	61.28	R.N*TTEVVNTMCGYK.T	2.92	-0.87	760.336	2	YTCCIRNTTEVVN	2	Tetraspanin-15 (Fragment)
B1AKP1	TSPAN2	114	1000	R.GKGN*GTLITFHSTFQCCGK.E	2.539	0.08	705.999	3	KDRGKGNGTLITF	3	Tetraspanin-2
H0YKJ9	TSPAN3	38	37.54	K.TYN*GTNPDAASR.A	2.308	-0.16	635.283	2	KVYKTYNGTNPDA	3	Tetraspanin-3
H0YKJ9	TSPAN3	63	33.192	R.QLHCCGIHN*YSDWENTDWFKETK.N	2.98	-0.78	595.059	5	HCCGIHNYSDWEN	4	Tetraspanin-3
H0YKJ9	TSPAN3	78	1000	K.N*QSVPLSCCR.E	2.099	-0.01	612.273	2	WFKETKNQSVPLS	4	Tetraspanin-3
H0YKJ9	TSPAN3	94	5.75	R.ETASNCN*GSLAHPSDLYAEGCEALVVK.K	4.076	-0.2	965.772	3	ETASNCNGSLAHP	6	Tetraspanin-3
F8VVF8	TSPAN31	31	1000	R.SKQTDVIN*ASWWVM^SN*K.T	3.145	1.13	672.656	3	KQTDVINASWWVM	2	Tetraspanin-31 (Fragment)
F8VVF8	TSPAN31	39	1000	R.SKQTDVIN*ASWWVM^SN*K.T	3.145	1.13	672.656	3	SWWVMSNKTRDEL	2	Tetraspanin-31 (Fragment)
O43657	TSPAN6	134	1000	K.ALKQYN*STGDYR.S	1.764	-0.16	709.843	2	KALKQYNSTGDYR	4	Tetraspanin-6 (Tspan-6) (A15 homolog) (Putative NF-kappa-B-activating protein 321) (T245 protein) (Tetraspanin TM4-D) (Transmembrane 4 superfamily member 6)
H7C3T6	TTYH3	11	9.394	R.VQEVLN*GTEVNLQHLTALVDCR.S	2.682	-0.31	837.763	3	RVQEVLNGTEVNL	3	Protein tweety homolog (Fragment)
Q9C0H2	TTYH3	144	1000	R.VWDTAVGLN*HTAEPSLQTLER.Q	2.116	-0.33	780.728	3	DTAVGLNHTAEPS	3	Protein tweety homolog 3 (hTTY3)
H0YNK6	TYRO3	18	1000	K.LTVSQGQPVKLN*CSVEGMEEPDIQWVK.D	3.855	0.87	1025.51	3	GQPVKLNCSVEGM	2	Tyrosine-protein kinase receptor TYRO3
H0YNK6	TYRO3	146	32.925	K.IGGPAPSPSVLN*VTGVTQSTM^FSCEAHNLK.G	2.925	2.2	1040.18	3	PSPSVLNVTGVTQ	5	Tyrosine-protein kinase receptor TYRO3
H0YNK6	TYRO3	185	1000	R.TATVHLQALPAAPFN*ITVTK.L	2.543	0.8	699.393	3	LPAAPFNITVTKL	1	Tyrosine-protein kinase receptor TYRO3
H0YNK6	TYRO3	195	1000	K.LSSSN*ASVAWMPGADGR.A	2.982	-0.36	854.896	2	TKLSSSNASVAWM	2	Tyrosine-protein kinase receptor TYRO3
Q9BZM4	ULBP3	37	1000	R.ADAHSLWYN*FTIIHLPR.H	3.16	-0.07	515.018	4	AHSLWYNFTIIHL	3	NKG2D ligand 3 (N2DL-3) (NKG2DL3) (ALCAN-gamma) (Retinoic acid early transcript 1N)
Q8IZJ1	UNC5B	347	26.045	R.DCSGTLLDSKN*CTDGLCMQNK.K	3.187	3.94	807.344	3	TLLDSKNCTDGLC	3	Netrin receptor UNC5B (Protein unc-5 homolog 2) (Protein unc-5 homolog B) (p53-regulated receptor for death and life protein 1)
D6RE16	UNC5C	236	1000	R.LSDTAN*YTCVAK.N	2.763	0.59	673.314	2	RLSDTANYTCVAK	3	Netrin receptor UNC5C
Q9Y2C2	UST	84	1000	R.QYLGN*STYLDDHGPPPSK.V	1.996	-0.26	664.646	3	LRQYLGNSTYLDD	2	Uronyl 2-sulfotransferase (EC 2.8.2.-)
Q9Y2C2	UST	140	102.514	K.HGFNLVTSDIHN*K.T	2.847	-0.06	495.584	3	VTSDIHNKTRLTK	3	Uronyl 2-sulfotransferase (EC 2.8.2.-)
Q9Y2C2	UST	155	1.115	K.NEQM^ELIKN*ISTAEQPYLFTR.H	3.711	-1.51	848.755	3	QMELIKNISTAEQ	4	Uronyl 2-sulfotransferase (EC 2.8.2.-)
Q9Y2C2	UST	173	1000	R.HVHFLN*FSR.F	2.391	-0.27	387.201	3	RHVHFLNFSRFGG	1	Uronyl 2-sulfotransferase (EC 2.8.2.-)
Q9Y2C2	UST	319	1000	K.LGN*MTVTVK.K	2.204	0.12	483.265	2	EHRKLGNMTVTVK	5	Uronyl 2-sulfotransferase (EC 2.8.2.-)
Q8N0Z9	VSIG10	326	1000	K.TCFTGGN*VTLTCQVSGAYPPAK.I	2.848	1.27	778.034	3	TCFTGGNVTLTCQ	5	V-set and immunoglobulin domain-containing protein 10
Q8N0Z9	VSIG10	369	1000	R.HLITQDGQN*STLTIHN*CSQDLDEGYYICR.A	3.8	0.37	865.141	4	ITQDGQNSTLTIH	3	V-set and immunoglobulin domain-containing protein 10
Q8N0Z9	VSIG10	376	1000	R.HLITQDGQN*STLTIHN*CSQDLDEGYYICR.A	3.8	0.37	865.141	4	STLTIHNCSQDLD	3	V-set and immunoglobulin domain-containing protein 10
O96014	WNT11	40	1000	K.TPSALALN*QTQHCK.Q	3.01	-0.83	524.595	3	PSALALNQTQHCK	2	Protein Wnt-11
C9J8I8	WNT5A	99	1000	R.WN*CSTVDN*TSVFGR.V	3.27	0.19	824.856	2	FRHRRWNCSTVDN	2	Protein Wnt (Fragment)
C9J8I8	WNT5A	105	1000	R.WN*CSTVDN*TSVFGR.V	3.27	0.19	824.856	2	NCSTVDNTSVFGR	2	Protein Wnt (Fragment)
P41221	WNT5A	312	54.857	R.FNSPTTQDLVYIDPSPDYCVRN*ESTGSLGTQGR.L	3.082	1.08	920.179	4	PDYCVRNESTGSL	6	Protein Wnt-5a
Q9H1J7	WNT5B	291	1000	R.FTQPTPEDLVYVDPSPDYCLRN*ESTGSLGTQGR.L	3.158	0.65	1234.91	3	PDYCLRNESTGSL	2	Protein Wnt-5b

## Sheet: description
Column Heading	Description
UniProt name	UniProt symbol of the protein
Gene symbol	Gene symbol for the assigned N-sialoglycoprotein
Site	The N-sialoglycosylation site
ModScore	Score matching the indicated N-sialoglycosylation site
Sequence	Sequence of the N-sialoglycopeptide obtained by ModScore, *-N-sialoglycosylation site; ^-methionine oxidation;
XCorr	SEQUEST XCorr
ppm	Mass accuracy of the peptide
Obs m/z	Observed mass-to-charge ratio of the indicated peptide
z	Charge state of the peptide
Local sequence	Local sequence of the glycosylation site
Count	Number of times the sialoglycopeptide was identified
Annotation	Description of the protein function
