# Supplementary material for: Systematic and site-specific analysis of N-sialoglycosylated proteins on the cell surface by integrating click chemistry and MS-based proteomics
Source: Royal Society of Chemistry journal article supplement (doi:10.1039/c5sc01124h), 2015-01-01
Supplement: c5sc01124h9.xlsx [file c5sc01124h9.xlsx]

## Sheet: Glycosylation-site-identified
Table S4. Identification of 541 N-sialoglycosylation sites on cell surface proteins of breast cancer cells
UniProt name	Gene symbol	Site	ModScore	Sequence	XCorr	MDA-MB-231	MCF-7	ppm	Obs m/z	z	Local sequence	Count	Annotation
D6RDV5	EFNA5	162	1000	K.VFVR@PTN*DTVHESAEPSR@.G	3.945	Yes	No	0.89	1028.52	2	VFVRPTNDTVHES	2	D6RDV5_HUMAN Ephrin-A5
O00461	GOLIM4	257	148.557	R.KPDPAEQQN*VTQVAHSPQGYNTAR.E	4.125	Yes	Yes	0.49	880.428	3	DPAEQQNVTQVAH	5	GOLI4_HUMAN Golgi integral membrane protein 4
O00468	AGRN	135	70.435	K.NELMLN*SSLMR.I	2.26	No	Yes	0.18	655.82	2	KNELMLNSSLMRI	1	AGRIN_HUMAN Agrin
O00478	BTN3A3	115	1000	R.IHN*VTASDSGK#.Y	1.79	Yes	No	1.15	570.288	2	AALRIHNVTASDS	2	BT3A3_HUMAN Butyrophilin subfamily 3 member A3
O00592	PODXL	360	76.733	K.QLVLN*LTGNTLCAGGASDEK#.L	4.915	Yes	No	0.26	1036.52	2	EKQLVLNLTGNTL	3	PODXL_HUMAN Podocalyxin
O00754	MAN2B1	766	74.417	K.LN*QTEPVAGNYYPVNTR.I	3.091	No	Yes	2.35	969.978	2	RPTWKLNQTEPVA	1	MA2B1_HUMAN Lysosomal alpha-mannosidase
O14495	PPAP2B	170	40.154	R.LR@PHFLSVCNPDFSQIN*CSEGYIQNYR@.C	3.425	Yes	No	-0.22	833.149	4	PDFSQINCSEGYI	2	LPP3_HUMAN Lipid phosphate phosphohydrolase 3
O14672	ADAM10	537	51.727	R.EGICN*GFTALCPASDPK#PN*FTDCNR@.H	3.385	Yes	No	-2	954.42	3	AREGICNGFTALC	1	ADA10_HUMAN Disintegrin and metalloproteinase domain-containing protein 10
O14672	ADAM10	551	14.062	R.EGICN*GFTALCPASDPK#PN*FTDCNR@.H	3.385	Yes	Yes	-2	954.42	3	ASDPKPNFTDCNR	2	ADA10_HUMAN Disintegrin and metalloproteinase domain-containing protein 10
O14786	NRP1	150	1000	R.GPECSQN*YTTPSGVIK#.S	3.85	Yes	Yes	0.4	874.911	2	GPECSQNYTTPSG	8	NRP1_HUMAN Neuropilin-1
O14786	NRP1	261	1000	K.EGFSAN*YSVLQSSVSEDFK#.C	3.725	Yes	No	-1.8	1052.99	2	KEGFSANYSVLQS	3	NRP1_HUMAN Neuropilin-1
O14786	NRP1	522	9.34	K.IGYSNN*GSDWK#.M	2.666	Yes	No	0.22	626.285	2	KIGYSNNGSDWKM	2	NRP1_HUMAN Neuropilin-1
O15031	PLXNB2	127	1000	R.ALSN*ISLR@.L	1.829	Yes	Yes	0.23	441.766	2	ALRALSNISLRLF	3	PLXB2_HUMAN Plexin-B2
O15031	PLXNB2	391	67.704	R.GGLN*LTAVTVAAENN*HTVAFLGTSDGR@.I	4.256	Yes	No	-0.51	899.79	3	LQRGGLNLTAVTV	1	PLXB2_HUMAN Plexin-B2
O15031	PLXNB2	402	0	R.GGLN*LTAVTVAAENN*HTVAFLGTSDGR@.I	4.256	Yes	No	-0.51	899.79	3	TVAAENNHTVAFL	1	PLXB2_HUMAN Plexin-B2
O15031	PLXNB2	528	1000	K.SCVAVTSAQPQN*M^SR@.R	4.406	Yes	Yes	1.51	830.885	2	TSAQPQNMSRRAQ	4	PLXB2_HUMAN Plexin-B2
O15031	PLXNB2	733	1000	K.LSHDAN*ETLPLHLYVK#.S	3.233	Yes	Yes	0.35	466.001	4	KLSHDANETLPLH	4	PLXB2_HUMAN Plexin-B2
O15031	PLXNB2	795	1000	R.CVYEALCN*TTSECPPPVITR@.I	3.912	Yes	No	0.86	1188.55	2	VYEALCNTTSECP	3	PLXB2_HUMAN Plexin-B2
O15031	PLXNB2	1099	1000	R.TEAGAFEYVPDPTFEN*FTGGVK#K#.Q	3.646	Yes	No	3.96	1262.12	2	PDPTFENFTGGVK	8	PLXB2_HUMAN Plexin-B2
O15230	LAMA5	2209	1000	R.LN*ASIADLQSQLR@.S	2.967	Yes	Yes	-0.66	719.398	2	ARLHRLNASIADL	2	LAMA5_HUMAN Laminin subunit alpha-5
O15230	LAMA5	2303	1000	R.TLSELMSQTGHLGLAN*ASAPSGEQLLR.T	3.909	No	Yes	-0.14	928.807	3	GHLGLANASAPSG	1	LAMA5_HUMAN Laminin subunit alpha-5
O15394	NCAM2	177	48.874	R.FAMLANNNLQILNIN*K.S	4.631	No	Yes	1.7	917.494	2	LQILNINKSDEGI	3	NCAM2_HUMAN Neural cell adhesion molecule 2
O15394	NCAM2	219	1000	K.SFN*ATAERGEEMTFSCR.A	3.612	No	Yes	0.84	665.953	3	MPQKSFNATAERG	5	NCAM2_HUMAN Neural cell adhesion molecule 2
O15394	NCAM2	474	49.59	R.YN*CTATNHIGTR.F	2.789	No	Yes	-0.14	470.882	3	NDFGRYNCTATNH	1	NCAM2_HUMAN Neural cell adhesion molecule 2
O15394	NCAM2	562	84.609	R.SHGVQTM^VVLNNLEPN*TTYEIR.V	4.055	No	Yes	0	845.42	3	LNNLEPNTTYEIR	6	NCAM2_HUMAN Neural cell adhesion molecule 2
O15427	SLC16A3	149	1000	R.R@PMAN*GLAAAGSPVFLCALSPLGQLLQDR@.Y	5.364	Yes	No	1.08	1013.55	3	KRRPMANGLAAAG	4	MOT4_HUMAN Monocarboxylate transporter 4
O43194	GPR39	206	124.374	R.HHEQPETSN*MSICTNLSSR@.W	4.12	Yes	No	0.3	746.335	3	EQPETSNMSICTN	1	GPR39_HUMAN G-protein coupled receptor 39
O43688	PPAP2C	139	1000	R.VN*CSVYVQLEK#.V	2.953	Yes	Yes	0.36	675.341	2	PDWSRVNCSVYVQ	2	LPP2_HUMAN Lipid phosphate phosphohydrolase 2
O60449	LY75	135	1000	K.DGHGTAISN*ASDVWK#.K	2.029	Yes	No	0.36	523.582	3	HGTAISNASDVWK	1	LY75_HUMAN Lymphocyte antigen 75
O60462	NRP2	152	1000	K.N*FTSPN*GTIESPGFPEK#.Y	3.241	Yes	No	0.44	918.432	2	SEDCSKNFTSPNG	2	NRP2_HUMAN Neuropilin-2
O60462	NRP2	157	1000	K.N*FTSPN*GTIESPGFPEK#.Y	3.241	Yes	No	0.44	918.432	2	KNFTSPNGTIESP	2	NRP2_HUMAN Neuropilin-2
O75054	IGSF3	655	24.437	R.KNYN*NTWTR.L	2.015	No	Yes	0.79	600.289	2	LWRKNYNNTWTRL	1	IGSF3_HUMAN Immunoglobulin superfamily member 3
O75054	IGSF3	825	1000	R.LSQAQGN*LSVLETR.Q	3.713	No	Yes	0.91	759.905	2	LSQAQGNLSVLET	2	IGSF3_HUMAN Immunoglobulin superfamily member 3
O75054	IGSF3	961	1000	K.RAEDTAGQTALTVMRPDASLQVDTVVPN*ATVSEK.A	4.353	No	Yes	1.3	1191.94	3	VDTVVPNATVSEK	3	IGSF3_HUMAN Immunoglobulin superfamily member 3
O75054	IGSF3	1077	1000	R.LTVLQASPQDTGN*YSCHVEEWLPSPQK.E	3.162	No	Yes	0.94	1029.83	3	SPQDTGNYSCHVE	2	IGSF3_HUMAN Immunoglobulin superfamily member 3
O75144	ICOSLG	70	30.612	K.TVVTYHIPQN*SSLENVDSR.Y	2.788	No	Yes	0.84	721.359	3	TYHIPQNSSLENV	3	ICOSL_HUMAN ICOS ligand
O75197	LRP5	138	30.835	R.IEVANLN*GTSR@.K	2.523	Yes	No	0.5	591.819	2	IEVANLNGTSRKV	2	LRP5_HUMAN Low-density lipoprotein receptor-related protein 5
O75326	SEMA7A	157	53.534	R.HPSCWNLVN*GTVVPLGEMR@.G	3.849	Yes	No	-0.99	1088.04	2	SCWNLVNGTVVPL	3	SEM7A_HUMAN Semaphorin-7A
O75882	ATRN	300	1000	R.GICN*SSDVR@.G	1.683	Yes	No	-0.16	508.736	2	PHRGICNSSDVRG	2	ATRN_HUMAN Attractin
O75882	ATRN	731	1000	R.N*HSCSEGQISIFR@.Y	2.43	Yes	No	0.75	772.362	2	DHCVPRNHSCSEG	1	ATRN_HUMAN Attractin
O75976	CPD	172	78.616	R.LLN*TTDVYLLPSLNPDGFER.A	3.024	No	Yes	-1.82	1140.58	2	RLVRLLNTTDVYL	1	CBPD_HUMAN Carboxypeptidase D
O75976	CPD	399	23.711	K.DSITGSGLEN*ATISVAGIN*HNITTGR@.F	2.781	Yes	No	-2.18	870.772	3	TGSGLENATISVA	1	CBPD_HUMAN Carboxypeptidase D
O75976	CPD	410	4.085	K.DSITGSGLEN*ATISVAGINHN*ITTGR@.F	2.781	Yes	No	-2.18	870.772	3	VAGINHNITTGRF	1	CBPD_HUMAN Carboxypeptidase D
O75976	CPD	1142	4.545	K.HLASLYANNHPSMHMGQPSCPN*K#SDENIPGGVMR@.G	3.918	Yes	No	-0.91	753.551	5	GQPSCPNKSDENI	1	CBPD_HUMAN Carboxypeptidase D
O76082	SLC22A5	57	1000	R.VPDAAN*LSSAWR.N	2.507	No	Yes	-0.25	645.322	2	RVPDAANLSSAWR	1	S22A5_HUMAN Solute carrier family 22 member 5
O95084	PRSS23	207	1000	R.GAN*DSTSAMPEQMK#.F	3.252	Yes	No	-0.21	739.317	2	DGGRGANDSTSAM	1	PRS23_HUMAN Serine protease 23
O95297	MPZL1	50	1000	K.EIFVAN*GTQGK#.L	2.724	Yes	No	0.43	587.808	2	KEIFVANGTQGKL	2	MPZL1_HUMAN Myelin protein zero-like protein 1
O95297	MPZL1	130	62.659	K.K#DASINIENMQFIHN*GTYICDVK#.N	4.128	Yes	No	2.26	910.445	3	NMQFIHNGTYICD	2	MPZL1_HUMAN Myelin protein zero-like protein 1
O95477	ABCA1	196	1000	K.VFLQGYQLHLTSLCN*GSK#.S	4.368	Yes	No	-0.51	1038.53	2	HLTSLCNGSKSEE	1	ABCA1_HUMAN ATP-binding cassette sub-family A member 1
O95477	ABCA1	478	1000	K.HPEDVQSSN*GSVYTWR@.E	3.98	Yes	No	0.74	935.932	2	EDVQSSNGSVYTW	2	ABCA1_HUMAN ATP-binding cassette sub-family A member 1
O95477	ABCA1	489	37.54	R.EAFN*ETNQAIR@.T	3.005	Yes	No	0.67	651.32	2	TWREAFNETNQAI	1	ABCA1_HUMAN ATP-binding cassette sub-family A member 1
P00533	EGFR	568	100.037	R.EFVENSECIQCHPECLPQAMN*ITCTGR@.G	4.879	Yes	No	2.09	1097.14	3	CLPQAMNITCTGR	2	EGFR_HUMAN Epidermal growth factor receptor
P00533	EGFR	603	9.34	K.TCPAGVM^GEN*NTLVWK#.Y	4.265	Yes	Yes	0.11	902.423	2	AGVMGENNTLVWK	4	EGFR_HUMAN Epidermal growth factor receptor
P01033	TIMP1	53	1000	K.FVGTPEVN*QTTLYQR@.Y	3.829	Yes	No	0.01	881.454	2	VGTPEVNQTTLYQ	2	TIMP1_HUMAN Metalloproteinase inhibitor 1
P01130	LDLR	657	89.827	R.LTGSDVNLLAENLLSPEDMVLFHN*LTQPR@.G	5.064	Yes	No	0.56	1082.56	3	DMVLFHNLTQPRG	6	LDLR_HUMAN Low-density lipoprotein receptor
P01889	HLA-B	110	1000	R.GYYN*QSEAGSHTLQSM^YGCDVGPDGR@.L	4.698	Yes	No	-0.25	958.735	3	NLRGYYNQSEAGS	6	1B07_HUMAN HLA class I histocompatibility antigen, B-7 alpha chain
P01892	HLA-A	110	1000	R.GYYN*QSEAGSHTVQR.M	4.688	Yes	Yes	1.1	850.382	2	TLRGYYNQSEAGS	3	1A02_HUMAN HLA class I histocompatibility antigen, A-2 alpha chain
P01903	HLA-DRA	103	23.523	K.R@SN*YTPITNVPPEVTVLTNSPVELR@.E	5.064	Yes	No	0.72	937.845	3	IMTKRSNYTPITN	4	DRA_HUMAN HLA class II histocompatibility antigen, DR alpha chain
P02786	TFRC	251	1000	K.DFEDLYTPVN*GSIVIVR@.A	2.497	Yes	Yes	-1.28	973.507	2	DLYTPVNGSIVIV	8	TFR1_HUMAN Transferrin receptor protein 1
P02786	TFRC	727	31.275	K.QNNGAFN*ETLFR.N	2.288	No	Yes	0.35	707.336	2	QNNGAFNETLFRN	2	TFR1_HUMAN Transferrin receptor protein 1
P04040	CAT	213	1000	R.HMN*GYGSHTFK#.L	3.326	Yes	No	0.08	430.529	3	DGHRHMNGYGSHT	1	CATA_HUMAN Catalase
P04062	GBA	185	1000	R.TYTYADTPDDFQLHN*FSLPEEDTK.L	3.113	Yes	Yes	0.26	950.756	3	DDFQLHNFSLPEE	3	GLCM_HUMAN Glucosylceramidase
P04156	PRNP	181	39.663	R.YPNQVYYR@PM^DEYSNQNNFVHDCVN*ITIK#.Q	4.684	Yes	No	-0.12	1218.89	3	FVHDCVNITIKQH	6	PRIO_HUMAN Major prion protein
P04156	PRNP	197	1000	K.GEN*FTETDVK#.M	2.375	Yes	Yes	0.62	575.766	2	TTTKGENFTETDV	3	PRIO_HUMAN Major prion protein
P04233	CD74	130	1000	R.MATPLLMQALPMGALPQGPMQN*ATK#.Y	3.629	Yes	No	-1.62	1311.17	2	PQGPMQNATKYGN	2	HG2A_HUMAN HLA class II histocompatibility antigen gamma chain
P04233	CD74	136	143.502	K.YGN*MTEDHVMHLLQNADPLK#.V	3.527	Yes	No	0.85	779.705	3	NATKYGNMTEDHV	3	HG2A_HUMAN HLA class II histocompatibility antigen gamma chain
P04626	ERBB2	187	122.154	K.NNQLALTLIDTN*R@.S	2.327	Yes	No	1.76	747.91	2	LTLIDTNRSRACH	1	ERBB2_HUMAN Receptor tyrosine-protein kinase erbB-2
P04626	ERBB2	530	1000	R.GHCWGPGPTQCVN*CSQFLR@.G	4.415	Yes	No	-0.13	757.334	3	GPTQCVNCSQFLR	3	ERBB2_HUMAN Receptor tyrosine-protein kinase erbB-2
P04626	ERBB2	629	1000	K.FPDEEGACQPCPIN*CTHSCVDLDDK#GCPAEQR@.A	4.961	Yes	No	-0.05	945.645	4	CQPCPINCTHSCV	3	ERBB2_HUMAN Receptor tyrosine-protein kinase erbB-2
P05026	ATP1B1	158	100.207	K.LEWLGN*CSGLNDETYGYK.E	5.352	Yes	Yes	0.42	1061.47	2	KLEWLGNCSGLND	16	AT1B1_HUMAN Sodium/potassium-transporting ATPase subunit beta-1
P05026	ATP1B1	193	1000	R.VLGFKPKPPKN*ESLETYPVM^K.Y	3.912	No	Yes	-0.62	807.77	3	KPKPPKNESLETY	3	AT1B1_HUMAN Sodium/potassium-transporting ATPase subunit beta-1
P05362	ICAM1	183	1000	R.DHHGAN*FSCR@.T	2.539	Yes	No	-0.73	403.839	3	RDHHGANFSCRTE	2	ICAM1_HUMAN Intercellular adhesion molecule 1
P05362	ICAM1	267	64.398	R.LNPTVTYGN*DSFSAK.A	2.319	Yes	Yes	-0.16	808.888	2	PTVTYGNDSFSAK	2	ICAM1_HUMAN Intercellular adhesion molecule 1
P05556	ITGB1	50	28.218	K.SCGECIQAGPNCGWCTN*STFLQEGMPTSAR@.C	4.511	Yes	No	0	1129.14	3	NCGWCTNSTFLQE	3	ITB1_HUMAN Integrin beta-1
P05556	ITGB1	212	123.857	R.NPCTSEQN*CTSPFSYK#.N	4.614	Yes	Yes	0.26	965.9	2	PCTSEQNCTSPFS	14	ITB1_HUMAN Integrin beta-1
P05556	ITGB1	481	1000	K.CHEGN*GTFECGACR@.C	3.422	Yes	Yes	0.83	555.213	3	PKCHEGNGTFECG	3	ITB1_HUMAN Integrin beta-1
P05556	ITGB1	520	100.742	R.KEN*SSEICSNNGECVCGQCVCR.K	4.9	Yes	Yes	-0.53	884.015	3	AYCRKENSSEICS	18	ITB1_HUMAN Integrin beta-1
P05556	ITGB1	669	1000	K.DTCTQECSYFN*ITK#.V	3.034	Yes	Yes	-0.41	889.373	2	QECSYFNITKVES	7	ITB1_HUMAN Integrin beta-1
P06213	INSR	445	1000	K.HN*LTITQGK#.L	2.863	Yes	No	0.51	511.784	2	WDWSKHNLTITQG	1	INSR_HUMAN Insulin receptor
P06213	INSR	698	1000	R.TWSPPFESEDSQK#HN*QSEYEDSAGECCSCPK#.T	2.898	Yes	No	-0.72	924.622	4	EDSQKHNQSEYED	3	INSR_HUMAN Insulin receptor
P06731	CEACAM5	104	46.016	R.EIIYPN*ASLLIQNIIQN*DTGFYTLHVIK.S	3.469	No	Yes	1.21	1079.58	3	REIIYPNASLLIQ	2	CEAM5_HUMAN Carcinoembryonic antigen-related cell adhesion molecule 5
P06731	CEACAM5	115	11.721	R.EIIYPN*ASLLIQNIIQN*DTGFYTLHVIK.S	3.469	No	Yes	1.21	1079.58	3	IQNIIQNDTGFYT	2	CEAM5_HUMAN Carcinoembryonic antigen-related cell adhesion molecule 5
P06731	CEACAM5	204	1000	R.TLTLFN*VTRN*DTASYK.C	3.478	No	Yes	-0.08	925.469	2	RTLTLFNVTRNDT	1	CEAM5_HUMAN Carcinoembryonic antigen-related cell adhesion molecule 5
P06731	CEACAM5	208	1000	R.TLTLFN*VTRN*DTASYK.C	3.478	No	Yes	-0.08	925.469	2	LFNVTRNDTASYK	1	CEAM5_HUMAN Carcinoembryonic antigen-related cell adhesion molecule 5
P06731	CEACAM5	480	30.835	K.NSGLYTCQAN*NSASGHSR.T	2.74	No	Yes	0.35	642.947	3	LYTCQANNSASGH	1	CEAM5_HUMAN Carcinoembryonic antigen-related cell adhesion molecule 5
P06731	CEACAM5	580	65.44	R.AYVCGIQNSVSAN*R.S	3.109	No	Yes	-1.21	771.366	2	QNSVSANRSDPVT	2	CEAM5_HUMAN Carcinoembryonic antigen-related cell adhesion molecule 5
P06733	ENO1	154	9.296	R.HIADLAGNSEVILPVPAFNVIN*GGSHAGNK#.L	4.286	Yes	No	-1.91	1008.19	3	PAFNVINGGSHAG	1	ENOA_HUMAN Alpha-enolase
P06733	ENO1	363	1000	K.LAQAN*GWGVMVSHR@.S	2.503	Yes	No	-0.31	512.264	3	CKLAQANGWGVMV	2	ENOA_HUMAN Alpha-enolase
P06756	ITGAV	74	1000	K.AN*TTQPGIVEGGQVLK#.C	3.005	Yes	Yes	0.99	811.941	2	VGAPKANTTQPGI	4	ITAV_HUMAN Integrin alpha-V
P06756	ITGAV	835	0	K.YNN*NTLLYILHYDIDGPMN*CTSDMEINPLR@.I	4.147	Yes	No	2.28	1204.56	3	WPYKYNNNTLLYI	1	ITAV_HUMAN Integrin alpha-V
P06756	ITGAV	851	56.122	K.YNN*NTLLYILHYDIDGPMN*CTSDMEINPLR@.I	4.147	Yes	No	2.28	1204.56	3	DIDGPMNCTSDME	2	ITAV_HUMAN Integrin alpha-V
P06756	ITGAV	874	1000	K.ISSLQTTEKN*DTVAGQGERDHLITK.R	3.503	Yes	Yes	0.34	915.47	3	LQTTEKNDTVAGQ	8	ITAV_HUMAN Integrin alpha-V
P07204	THBD	115	9.34	R.GFQWVTGDN*NTSYSR@.W	3.153	Yes	No	-1.66	870.892	2	QWVTGDNNTSYSR	1	TRBM_HUMAN Thrombomodulin
P07204	THBD	116	9.34	R.GFQWVTGDNN*TSYSR@.W	3.995	Yes	Yes	0.11	870.894	2	WVTGDNNTSYSRW	3	TRBM_HUMAN Thrombomodulin
P07686	HEXB	327	59.298	K.LDSFGPINPTLN*TTYSFLTTFFK#.E	4.524	Yes	Yes	1.39	1318.17	2	PINPTLNTTYSFL	4	HEXB_HUMAN Beta-hexosaminidase subunit beta
P07737	PFN1	62	1000	R.SSFYVN*GLTLGGQK#.C	3.398	Yes	No	1.11	741.385	2	RSSFYVNGLTLGG	5	PROF1_HUMAN Profilin-1
P07996	THBS1	1067	1000	K.VVN*STTGPGEHLR@.N	2.4	Yes	No	0.81	459.244	3	LSVKVVNSTTGPG	3	TSP1_HUMAN Thrombospondin-1
P08069	IGF1R	244	92.247	R.ACTENNECCHPECLGSCSAPDN*DTACVACR.H	6.128	No	Yes	0.33	1173.43	3	SCSAPDNDTACVA	7	IGF1R_HUMAN Insulin-like growth factor 1 receptor
P08069	IGF1R	607	1000	R.TN*ASVPSIPLDVLSASN*SSSQLIVK.W	2.818	No	Yes	2.19	1267.18	2	ILYIRTNASVPSI	2	IGF1R_HUMAN Insulin-like growth factor 1 receptor
P08069	IGF1R	622	1000	R.TN*ASVPSIPLDVLSASN*SSSQLIVK.W	2.818	No	Yes	2.19	1267.18	2	DVLSASNSSSQLI	2	IGF1R_HUMAN Insulin-like growth factor 1 receptor
P08069	IGF1R	640	6.591	K.WNPPSLPNGN*LSYYIVR.W	2.418	No	Yes	2.02	997.009	2	PSLPNGNLSYYIV	1	IGF1R_HUMAN Insulin-like growth factor 1 receptor
P08069	IGF1R	747	1000	R.DVMQVAN*TTMSSR.S	3.067	No	Yes	-0.36	721.828	2	DVMQVANTTMSSR	3	IGF1R_HUMAN Insulin-like growth factor 1 receptor
P08069	IGF1R	756	1000	R.SRN*TTAADTYN*ITDPEELETEYPFFESR.V	4.709	No	Yes	0.38	1101.49	3	MSSRSRNTTAADT	4	IGF1R_HUMAN Insulin-like growth factor 1 receptor
P08069	IGF1R	764	1000	R.SRN*TTAADTYN*ITDPEELETEYPFFESR.V	4.709	No	Yes	0.38	1101.49	3	TAADTYNITDPEE	4	IGF1R_HUMAN Insulin-like growth factor 1 receptor
P08174	CD55	95	1000	K.GSQWSDIEEFCN*R.S	2.944	Yes	Yes	0.01	815.838	2	DIEEFCNRSCEVP	2	DAF_HUMAN Complement decay-accelerating factor
P08195	SLC3A2	365	1000	K.DASSFLAEWQN*ITK.G	3.043	No	Yes	0.22	806.891	2	FLAEWQNITKGFS	1	4F2_HUMAN 4F2 cell-surface antigen heavy chain
P08195	SLC3A2	381	198.394	R.LLIAGTN*SSDLQQILSLLESNK#.D	5.007	Yes	Yes	0.19	1184.65	2	LLIAGTNSSDLQQ	8	4F2_HUMAN 4F2 cell-surface antigen heavy chain
P08195	SLC3A2	424	76.733	K.SLVTQYLN*ATGNR@.W	3.016	Yes	Yes	-0.29	723.382	2	LVTQYLNATGNRW	3	4F2_HUMAN 4F2 cell-surface antigen heavy chain
P08581	MET	149	1000	R.HVFPHN*HTADIQSEVHCIFSPQIEEPSQCPDCVVSALGAK#.V	4.192	Yes	No	0.56	911.228	5	RHVFPHNHTADIQ	2	MET_HUMAN Hepatocyte growth factor receptor
P08581	MET	202	16.062	R.FINFFVGNTIN*SSYFPDHPLHSISVR@.R	4.281	Yes	No	0.19	1006.51	3	FVGNTINSSYFPD	1	MET_HUMAN Hepatocyte growth factor receptor
P08581	MET	399	76.035	R.CLQHFYGPNHEHCFN*R@.T	3.57	Yes	No	-0.17	708.975	3	NHEHCFNRTLLRN	2	MET_HUMAN Hepatocyte growth factor receptor
P08581	MET	785	46.129	R.MVINVHEAGR@N*FTVACQHR@.S	2.564	Yes	No	-0.4	752.046	3	VHEAGRNFTVACQ	2	MET_HUMAN Hepatocyte growth factor receptor
P08648	ITGA5	182	1000	R.TEK#EPLSDPVGTCYLSTDN*FTR@.I	2.943	Yes	No	0.86	849.739	3	CYLSTDNFTRILE	6	ITA5_HUMAN Integrin alpha-5
P08648	ITGA5	297	1000	K.GN*LTYGYVTILN*GSDIR@.S	4.524	Yes	No	0.51	934.48	2	AGVPKGNLTYGYV	1	ITA5_HUMAN Integrin alpha-5
P08648	ITGA5	307	1000	K.GN*LTYGYVTILN*GSDIR@.S	4.524	Yes	No	0.51	934.48	2	GYVTILNGSDIRS	1	ITA5_HUMAN Integrin alpha-5
P08648	ITGA5	675	30.835	K.NALN*LTFHAQNVGEGGAYEAELR@.V	3.639	Yes	No	-1.57	828.408	3	GDKNALNLTFHAQ	3	ITA5_HUMAN Integrin alpha-5
P08648	ITGA5	712	1000	R.HPGN*FSSLSCDYFAVN*QSR@.L	3.546	Yes	No	0.93	1099.49	2	LVRHPGNFSSLSC	2	ITA5_HUMAN Integrin alpha-5
P08648	ITGA5	724	1000	R.HPGN*FSSLSCDYFAVN*QSR@.L	3.546	Yes	No	0.93	1099.49	2	CDYFAVNQSRLLV	2	ITA5_HUMAN Integrin alpha-5
P08648	ITGA5	773	9.34	K.NLN*NSQSDVVSFR@.L	3.048	Yes	No	0.31	744.867	2	ILSKNLNNSQSDV	1	ITA5_HUMAN Integrin alpha-5
P08648	ITGA5	868	31.275	R.VTGLN*CTTNHPINPK#.G	3.73	Yes	No	-0.78	838.923	2	TRVTGLNCTTNHP	1	ITA5_HUMAN Integrin alpha-5
P08962	CD63	130	0	K.NN*HTASILDR.M	2.002	No	Yes	0.56	572.286	2	ENYPKNNHTASIL	2	CD63_HUMAN CD63 antigen
P08962	CD63	150	1000	K.CCGAAN*YTDWEK#.I	3.302	Yes	No	-1.04	743.29	2	KCCGAANYTDWEK	1	CD63_HUMAN CD63 antigen
P08962	CD63	172	6.603	K.NR@VPDSCCIN*VTVGCGINFNEK#.A	3.485	Yes	No	-0.03	857.4	3	PDSCCINVTVGCG	1	CD63_HUMAN CD63 antigen
P09603	CSF1	154	42.098	K.NVFN*ETK#.N	1.796	Yes	No	0.07	431.718	2	KVKNVFNETKNLL	1	CSF1_HUMAN Macrophage colony-stimulating factor 1
P09603	CSF1	172	24.437	K.NCN*NSFAECSSQDVVTK#PDCNCLYPK#.A	4.364	Yes	No	0.22	1042.78	3	IFSKNCNNSFAEC	1	CSF1_HUMAN Macrophage colony-stimulating factor 1
P09603-3	CSF1	172	24.437	K.NCN*NSFAECSSQGHER@.Q	3.828	Yes	No	-0.91	953.374	2	IFSKNCNNSFAEC	2	CSF1_HUMAN Isoform 3 of Macrophage colony-stimulating factor 1
P09758	TACSTD2	168	1000	R.HR@PTAGAFN*HSDLDAELR@R@.L	3.093	Yes	Yes	1.3	1092.57	2	PTAGAFNHSDLDA	8	TACD2_HUMAN Tumor-associated calcium signal transducer 2
P09758	TACSTD2	208	1000	K.FVAAVHYEQPTIQIELR@QN*TSQK#.A	4.014	Yes	No	-0.86	906.482	3	QIELRQNTSQKAA	2	TACD2_HUMAN Tumor-associated calcium signal transducer 2
P10586	PTPRF	721	1000	K.VEVEPLN*STAVHVYWK.L	3.519	Yes	Yes	-0.71	937.482	2	VEVEPLNSTAVHV	7	PTPRF_HUMAN Receptor-type tyrosine-protein phosphatase F
P10586	PTPRF	966	127.526	R.DINSQQELQN*ITTDTR.F	3.912	No	Yes	-0.08	939.95	2	SQQELQNITTDTR	1	PTPRF_HUMAN Receptor-type tyrosine-protein phosphatase F
P10909	CLU	374	1000	R.LAN*LTQGEDQYYLR.V	3.381	Yes	Yes	-0.56	843.914	2	WVSRLANLTQGED	2	CLUS_HUMAN Clusterin
P11047	LAMC1	1205	99.228	K.TAN*DTSTEAYNLLLR@.T	2.929	Yes	No	-0.23	845.927	2	RVAKTANDTSTEA	1	LAMC1_HUMAN Laminin subunit gamma-1
P11047	LAMC1	1395	109.529	K.IPAIN*QTITEANEK.T	3.096	No	Yes	1.05	772.907	2	RKIPAINQTITEA	2	LAMC1_HUMAN Laminin subunit gamma-1
P11142	HSPA8	151	49.59	K.TVTNAVVTVPAYFN*DSQR@.Q	2.787	Yes	No	-0.07	996.007	2	TVPAYFNDSQRQA	1	HSP7C_HUMAN Heat shock cognate 71 kDa protein
P11166	SLC2A1	45	1000	K.VIEEFYN*QTWVHR.Y	3.496	No	Yes	1.87	862.421	2	VIEEFYNQTWVHR	2	GTR1_HUMAN Solute carrier family 2, facilitated glucose transporter member 1
P11279	LAMP1	84	1000	R.SSCGK#EN*TSDPSLVIAFGR@.G	2.494	Yes	Yes	1.82	681.337	3	SSCGKENTSDPSL	4	LAMP1_HUMAN Lysosome-associated membrane glycoprotein 1
P11279	LAMP1	103	1000	R.GHTLTLN*FTR@.N	1.994	Yes	Yes	1.87	584.82	2	GHTLTLNFTRNAT	3	LAMP1_HUMAN Lysosome-associated membrane glycoprotein 1
P11279	LAMP1	121	1000	R.YSVQLMSFVYN*LSDTHLFPN*ASSK#.E	4.302	Yes	No	2.39	1381.67	2	LMSFVYNLSDTHL	1	LAMP1_HUMAN Lysosome-associated membrane glycoprotein 1
P11279	LAMP1	130	1000	R.YSVQLMSFVYN*LSDTHLFPN*ASSK#.E	4.302	Yes	No	2.39	1381.67	2	DTHLFPNASSKEI	1	LAMP1_HUMAN Lysosome-associated membrane glycoprotein 1
P11717	IGF2R	435	20.167	R.MSVINFECN*K#.T	1.896	Yes	No	-0.29	626.787	2	VINFECNKTAGND	1	MPRI_HUMAN Cation-independent mannose-6-phosphate receptor
P11717	IGF2R	1757	1000	K.HFN*YTSLIAFHCK#.R	3.397	Yes	Yes	1.2	824.901	2	LADKHFNYTSLIA	4	MPRI_HUMAN Cation-independent mannose-6-phosphate receptor
P13473	LAMP2	49	1000	K.WQMN*FTVR@.Y	1.75	Yes	No	0.18	545.77	2	YAKWQMNFTVRYE	1	LAMP2_HUMAN Lysosome-associated membrane glycoprotein 2
P13473	LAMP2	75	133.582	K.TVTISDHGTVTYN*GSICGDDQNGPK.I	3.829	Yes	Yes	0.52	880.398	3	HGTVTYNGSICGD	2	LAMP2_HUMAN Lysosome-associated membrane glycoprotein 2
P13473	LAMP2	101	1000	K.IAVQFGPGFSWIAN*FTK#.A	2.547	Yes	Yes	1.46	947.499	2	GFSWIANFTKAAS	9	LAMP2_HUMAN Lysosome-associated membrane glycoprotein 2
P13473	LAMP2	179	33.358	K.NDVVQHYWDVLVQAFVQN*GTVSTNEFLCDK#.D	4.725	Yes	No	0.19	1179.56	3	VQAFVQNGTVSTN	2	LAMP2_HUMAN Lysosome-associated membrane glycoprotein 2
P13473	LAMP2	257	30.835	K.VASVININPN*TTHSTGSCR.S	4.554	Yes	Yes	1.4	1016	2	VININPNTTHSTG	3	LAMP2_HUMAN Lysosome-associated membrane glycoprotein 2
P13598	ICAM2	82	1000	K.HYLVSN*ISHDTVLQCHFTCSGK#.Q	4.324	Yes	No	-0.21	872.076	3	KHYLVSNISHDTV	6	ICAM2_HUMAN Intercellular adhesion molecule 2
P13598	ICAM2	105	17.009	K.QESMNSN*VSVYQPPR@.Q	4.063	Yes	No	1.51	872.913	2	QESMNSNVSVYQP	3	ICAM2_HUMAN Intercellular adhesion molecule 2
P13598	ICAM2	153	1000	R.GN*ETLHYETFGK#.A	2.856	Yes	No	0.1	703.832	2	LFLFRGNETLHYE	1	ICAM2_HUMAN Intercellular adhesion molecule 2
P13598	ICAM2	176	1000	K.AAPAPQEATATFN*STADR@.E	3.369	Yes	No	2.07	914.441	2	EATATFNSTADRE	2	ICAM2_HUMAN Intercellular adhesion molecule 2
P13726	F3	156	1000	K.VN*VTVEDER@.T	2.725	Yes	No	0.16	535.271	2	QVGTKVNVTVEDE	2	TF_HUMAN Tissue factor
P13726	F3	169	24.437	R.R@N*NTFLSLR@.D	3.343	Yes	No	0.35	568.329	2	RTLVRRNNTFLSL	4	TF_HUMAN Tissue factor
P13987	CD59	43	1000	K.TAVN*CSSDFDACLITK#.A	3.758	Yes	No	1.19	906.911	2	DCKTAVNCSSDFD	2	CD59_HUMAN CD59 glycoprotein
P15151	PVR	120	1000	R.VEDEGN*YTCLFVTFPQGSR@.S	4.11	Yes	No	-1.59	1114.51	2	RVEDEGNYTCLFV	2	PVR_HUMAN Poliovirus receptor
P15328	FOLR1	69	58.167	K.NACCSTN*TSQEAHK#.D	2.585	Yes	No	0.34	540.224	3	NACCSTNTSQEAH	1	FOLR1_HUMAN Folate receptor alpha
P15328	FOLR1	161	123.857	K.GWN*WTSGFNK#.C	2.747	Yes	Yes	0.3	604.279	2	NWHKGWNWTSGFN	2	FOLR1_HUMAN Folate receptor alpha
P15514	AREG	113	1000	R.VEQVVK#PPQN*K#.T	2.683	Yes	No	0.15	642.873	2	VVKPPQNKTESEN	1	AREG_HUMAN Amphiregulin
P15529	CD46	83	1000	K.GYFYIPPLATHTICDR@N*HTWLPVSDDACYR@.E	3.565	Yes	No	0.26	1218.58	3	HTICDRNHTWLPV	1	MCP_HUMAN Membrane cofactor protein
P15586	GNS	279	115.01	K.TPMTN*SSIQFLDNAFR.K	4.312	Yes	Yes	1.48	922.942	2	AKTPMTNSSIQFL	2	GNS_HUMAN N-acetylglucosamine-6-sulfatase
P16070	CD44	57	1000	K.AFN*STLPTM^AQMEK#.A	2.902	Yes	Yes	-0.63	798.374	2	DLCKAFNSTLPTM	25	CD44_HUMAN CD44 antigen
P16144	ITGB4	327	171.488	K.HNIIPIFAVTN*YSYSYYEK#.L	5.419	Yes	Yes	0.59	1167.08	2	PIFAVTNYSYSYY	6	ITB4_HUMAN Integrin beta-4
P16144	ITGB4	695	1000	R.CSFR@DEDDDCTYSYTMEGDGAPGPN*STVLVHK#.K	4.548	Yes	No	2.04	1214.18	3	DGAPGPNSTVLVH	11	ITB4_HUMAN Integrin beta-4
P17181	IFNAR1	81	1000	K.LSGCQN*ITSTK.C	2.717	No	Yes	-0.39	606.295	2	KLSGCQNITSTKC	2	INAR1_HUMAN Interferon alpha/beta receptor 1
P17301	ITGA2	105	143.484	K.LNLQTSTSIPN*VTEMK#.T	4.656	Yes	Yes	0.16	893.965	2	TSTSIPNVTEMKT	13	ITA2_HUMAN Integrin alpha-2
P17301	ITGA2	343	1000	R.YFFN*VSDEAALLEK#.A	2.983	Yes	No	-2.58	828.908	2	TERYFFNVSDEAA	2	ITA2_HUMAN Integrin alpha-2
P17301	ITGA2	460	121.092	R.AN*YTGQIVLYSVNENGN*ITVIQAHR@.G	4.381	Yes	No	-0.42	929.477	3	AGAPRANYTGQIV	1	ITA2_HUMAN Integrin alpha-2
P17301	ITGA2	475	20.167	R.AN*YTGQIVLYSVNENGN*ITVIQAHR@.G	4.381	Yes	No	-0.42	929.477	3	SVNENGNITVIQA	1	ITA2_HUMAN Integrin alpha-2
P17301	ITGA2	1057	1000	R.TASCSN*VTCWLK#.D	2.159	Yes	No	0.42	719.328	2	RTASCSNVTCWLK	2	ITA2_HUMAN Integrin alpha-2
P18084	ITGB5	586	59.298	K.CHAGYIGDNCN*CSTDISTCR@.G	4.444	Yes	No	0.55	790.645	3	YIGDNCNCSTDIS	3	ITB5_HUMAN Integrin beta-5
P18084	ITGB5	654	1000	R.DCVECLLLHSGK#PDN*QTCHSLCR@.D	3.18	Yes	No	0.82	704.822	4	HSGKPDNQTCHSL	2	ITB5_HUMAN Integrin beta-5
P19440	GGT1	120	1000	R.LAFATMFN*SSEQSQK#.G	3.882	Yes	No	-0.17	850.402	2	AFATMFNSSEQSQ	2	GGT1_HUMAN Gamma-glutamyltranspeptidase 1
P20645	M6PR	83	182.307	R.EAGN*HTSGAGLVQINK.S	4.169	Yes	Yes	0.52	799.905	2	VCREAGNHTSGAG	3	MPRD_HUMAN Cation-dependent mannose-6-phosphate receptor
P20645	M6PR	107	80.999	R.LN*ETHIFN*GSNWIMLIYK.G	3.954	No	Yes	5.29	1100.06	2	TVVGRLNETHIFN	1	MPRD_HUMAN Cation-dependent mannose-6-phosphate receptor
P20645	M6PR	113	24.243	R.LN*ETHIFN*GSNWIMLIYK.G	3.954	No	Yes	5.29	1100.06	2	NETHIFNGSNWIM	1	MPRD_HUMAN Cation-dependent mannose-6-phosphate receptor
P21589	NT5E	333	1000	K.LDN*YSTQELGK#.T	3.45	Yes	No	0.36	639.813	2	WRIKLDNYSTQEL	4	5NTD_HUMAN 5'-nucleotidase
P21589	NT5E	403	0	R.SPIDER@NN*GTITWENLAAVLPFGGTFDLVQLK#.G	4.067	Yes	No	0.62	1178.29	3	PIDERNNGTITWE	1	5NTD_HUMAN 5'-nucleotidase
P21860	ERBB3	250	1000	R.HFN*DSGACVPR.C	1.931	No	Yes	-0.28	631.777	2	FACRHFNDSGACV	1	ERBB3_HUMAN Receptor tyrosine-protein kinase erbB-3
P21860	ERBB3	469	1000	R.QLCYHHSLN*WTK.V	2.58	No	Yes	0.12	795.375	2	CYHHSLNWTKVLR	1	ERBB3_HUMAN Receptor tyrosine-protein kinase erbB-3
P21860	ERBB3	566	1000	R.EFAHEAECFSCHPECQPMEGTATCN*GSGSDTCAQCAHFR.D	5.098	No	Yes	2.69	1134.94	4	EGTATCNGSGSDT	1	ERBB3_HUMAN Receptor tyrosine-protein kinase erbB-3
P21980	TGM2	517	1000	R.TVSYN*GILGPECGTK#.Y	2.898	Yes	No	0.16	803.892	2	ARTVSYNGILGPE	2	TGM2_HUMAN Protein-glutamine gamma-glutamyltransferase 2
P22314	UBA1	924	6.591	K.N*GFLNLALPFFGFSEPLAAPR@.H	5.185	Yes	No	0.69	1144.11	2	QLDSYKNGFLNLA	2	UBA1_HUMAN Ubiquitin-like modifier-activating enzyme 1
P22413	ENPP1	285	1000	K.M^N*ASFSLK#.S	1.899	Yes	No	-0.05	462.727	2	MYDPKMNASFSLK	3	ENPP1_HUMAN Ectonucleotide pyrophosphatase/phosphodiesterase family member 1
P22413	ENPP1	341	1000	K.MYN*GSVPFEER@.I	2.474	Yes	No	0.17	669.305	2	DIYKMYNGSVPFE	1	ENPP1_HUMAN Ectonucleotide pyrophosphatase/phosphodiesterase family member 1
P23229	ITGA6	770	30.835	K.QLSCVANQN*GSQADCELGNPFK#.R	4.756	Yes	No	-0.39	1224.55	2	SCVANQNGSQADC	2	ITA6_HUMAN Integrin alpha-6
P23229	ITGA6	930	24.243	K.EINSLN*LTESHNSR@K#.K	3.406	Yes	No	-0.74	879.956	2	KEINSLNLTESHN	1	ITA6_HUMAN Integrin alpha-6
P23470	PTPRG	156	1000	K.VEFHWGHSN*GSAGSEHSIN*GR@.R	4.014	Yes	No	3.2	1139.01	2	FHWGHSNGSAGSE	10	PTPRG_HUMAN Receptor-type tyrosine-protein phosphatase gamma
P23470	PTPRG	166	1000	K.VEFHWGHSN*GSAGSEHSIN*GR@.R	4.014	Yes	No	3.2	1139.01	2	GSEHSINGRRFPV	8	PTPRG_HUMAN Receptor-type tyrosine-protein phosphatase gamma
P23470	PTPRG	444	1000	R.SDFSQTMLFQAN*TTR@.I	2.935	Yes	No	-1.56	878.412	2	TMLFQANTTRIFQ	1	PTPRG_HUMAN Receptor-type tyrosine-protein phosphatase gamma
P25116	F2R	62	86.344	R.NPNDK#YEPFWEDEEK#N*ESGLTEYR@.L	3.622	Yes	No	3.04	1005.46	3	WEDEEKNESGLTE	1	PAR1_HUMAN Proteinase-activated receptor 1
P25942	CD40	180	1000	K.DLVVQQAGTN*K#TDVVCGPQDR@.L	4.869	Yes	No	-0.56	773.055	3	VQQAGTNKTDVVC	4	TNR5_HUMAN Tumor necrosis factor receptor superfamily member 5
P26006	ITGA3	86	1000	R.ELAVPDGYTN*R@.T	2.322	Yes	No	0.52	622.311	2	VPDGYTNRTGAVY	1	ITA3_HUMAN Integrin alpha-3
P26006	ITGA3	107	1000	K.DDCER@MN*ITVK#.N	2.384	Yes	No	0.03	466.554	3	DDCERMNITVKND	1	ITA3_HUMAN Integrin alpha-3
P26006	ITGA3	265	1000	K.N*ITIVTGAPR@.H	2.395	Yes	Yes	0.32	525.811	2	FILHPKNITIVTG	3	ITA3_HUMAN Integrin alpha-3
P26006	ITGA3	511	1000	R.R@N*ITLAYTLEADR@DR@.R	2.449	Yes	No	0.39	610.003	3	NPNYRRNITLAYT	7	ITA3_HUMAN Integrin alpha-3
P26006	ITGA3	573	1000	K.LR@PIIISM^N*YSLPLR@.M	3.486	Yes	Yes	0.44	606.36	3	PIIISMNYSLPLR	3	ITA3_HUMAN Integrin alpha-3
P26006	ITGA3	605	29.667	R.SLDAYPILNQAQALEN*HTEVQFQK#.E	3.33	Yes	No	-0.45	923.467	3	QAQALENHTEVQF	2	ITA3_HUMAN Integrin alpha-3
P26006	ITGA3	656	73.311	K.LLLSIN*VTNTR@.T	2.911	Yes	Yes	0.48	626.877	2	KLLLSINVTNTRT	3	ITA3_HUMAN Integrin alpha-3
P26006	ITGA3	697	22.329	R.SGEDAHEALLTLVVPPALLLSSVR@PPGACQAN*ETIFCELGNPFK#R@.N	4.528	Yes	No	0.79	1225.14	4	PGACQANETIFCE	1	ITA3_HUMAN Integrin alpha-3
P26006	ITGA3	926	1000	R.AHCVWLECPIPDAPVVTN*VTVK#.A	4.703	Yes	No	0.6	1258.64	2	DAPVVTNVTVKAR	3	ITA3_HUMAN Integrin alpha-3
P26006	ITGA3	969	5.085	R.TSIPTINMEN*K#.T	2.213	Yes	No	0.32	629.82	2	PTINMENKTTWFS	1	ITA3_HUMAN Integrin alpha-3
P26038	MSN	486	21.746	K.TAMSTPHVAEPAENEQDEQDEN*GAEASADLR@.A	5.146	Yes	No	4.85	1107.82	3	QDEQDENGAEASA	1	MOES_HUMAN Moesin
P27701	CD82	129	1000	R.DYN*SSR@EDSLQDAWDYVQAQVK#.C	5.012	Yes	No	0.17	878.739	3	ELIRDYNSSREDS	2	CD82_HUMAN CD82 antigen
P28827	PTPRM	92	1000	K.EN*DTHCIDFHYFVSSK#.S	2.418	Yes	No	0.11	670.627	3	LPQLKENDTHCID	1	PTPRM_HUMAN Receptor-type tyrosine-protein phosphatase mu
P28827	PTPRM	249	37.54	R.FIASFNVVN*TTK#.R	2.111	Yes	No	-0.27	676.365	2	ASFNVVNTTKRDA	1	PTPRM_HUMAN Receptor-type tyrosine-protein phosphatase mu
P28827	PTPRM	454	11.069	R.EEVSWDTENSHPQHTITNLSPYTN*VSVK#.L	3.263	Yes	No	-0.11	1075.18	3	NLSPYTNVSVKLI	2	PTPRM_HUMAN Receptor-type tyrosine-protein phosphatase mu
P28827	PTPRM	598	8.043	K.ISAPSMPAYELETPLN*QTDNTVTVMLK#PAHSR@.G	3.389	Yes	No	0.32	882.95	4	ELETPLNQTDNTV	1	PTPRM_HUMAN Receptor-type tyrosine-protein phosphatase mu
P29317	EPHA2	407	1000	R.TSVTVSDLEPHM^N*YTFTVEAR@.N	1.99	Yes	No	0.03	808.052	3	DLEPHMNYTFTVE	2	EPHA2_HUMAN Ephrin type-A receptor 2
P29317	EPHA2	435	1000	R.TASVSIN*QTEPPK#.V	2.637	Yes	No	-0.21	691.86	2	TASVSINQTEPPK	2	EPHA2_HUMAN Ephrin type-A receptor 2
P29323	EPHB2	265	1000	K.AGFEAVEN*GTVCR@.G	2.79	Yes	No	0.99	709.832	2	GFEAVENGTVCRG	2	EPHB2_HUMAN Ephrin type-B receptor 2
P30479	HLA-B	110	1000	R.GYYN*QSEAGSHTWQR@.M	4.387	Yes	No	0.18	896.897	2	NLRGYYNQSEAGS	2	1B41_HUMAN HLA class I histocompatibility antigen, B-41 alpha chain
P30530	AXL	157	2.37	R.TVAANTPFN*LSCQAQGPPEPVDLLWLQDAVPLATAPGHGPQR@.S	4.924	Yes	No	0.09	1111.57	4	AANTPFNLSCQAQ	1	UFO_HUMAN Tyrosine-protein kinase receptor UFO
P30530	AXL	198	1000	R.SLHVPGLN*K#.T	2.148	Yes	No	-0.27	488.283	2	LHVPGLNKTSSFS	2	UFO_HUMAN Tyrosine-protein kinase receptor UFO
P30530	AXL	339	1000	R.VACTSSQGPSSWTHWLPVETPEGVPLGPPEN*ISATR@.N	3.079	Yes	No	-0.15	964.222	4	PLGPPENISATRN	3	UFO_HUMAN Tyrosine-protein kinase receptor UFO
P30530	AXL	345	1000	R.N*GSQAFVHWQEPR@.A	2.893	Yes	No	-0.87	782.877	2	NISATRNGSQAFV	1	UFO_HUMAN Tyrosine-protein kinase receptor UFO
P30825	SLC7A1	226	166.39	K.NWQLTEEDFGN*TSGR.L	4.296	Yes	Yes	0.43	878.887	2	TEEDFGNTSGRLC	4	CTR1_HUMAN High affinity cationic amino acid transporter 1
P32004	L1CAM	100	7.71	K.EELGVTVYQSPHSGSFTITGN*NSNFAQR@.F	4.726	Yes	No	0.41	1017.15	3	SFTITGNNSNFAQ	6	L1CAM_HUMAN Neural cell adhesion molecule L1
P32004	L1CAM	203	30.612	R.VTMGQNGNLYFANVLTSDN*HSDYICHAHFPGTR@.T	4.333	Yes	No	1.1	1249.24	3	NVLTSDNHSDYIC	7	L1CAM_HUMAN Neural cell adhesion molecule L1
P32004	L1CAM	247	1000	R.LLFPTN*SSSHLVALQGQPLVLECIAEGFPTPTIK#.W	4.114	Yes	Yes	0.91	922.997	4	RLLFPTNSSSHLV	6	L1CAM_HUMAN Neural cell adhesion molecule L1
P32004	L1CAM	479	1000	R.FFPYAN*GTLGIR@.D	2.389	Yes	No	-0.08	682.863	2	RFFPYANGTLGIR	2	L1CAM_HUMAN Neural cell adhesion molecule L1
P32004	L1CAM	671	1000	K.VPGN*QTSTTLK#.L	2.373	Yes	Yes	0.14	578.813	2	LGKVPGNQTSTTL	3	L1CAM_HUMAN Neural cell adhesion molecule L1
P32004	L1CAM	726	71.067	K.NPVDVK#GEGN*ETTNMVITWK#PLR@.W	5.883	Yes	Yes	0.16	875.129	3	DVKGEGNETTNMV	10	L1CAM_HUMAN Neural cell adhesion molecule L1
P32004	L1CAM	777	1000	R.GPWQEQIVSDPFLVVSN*TSTFVPYEIK.V	3.22	Yes	Yes	0.65	1028.52	3	PFLVVSNTSTFVP	3	L1CAM_HUMAN Neural cell adhesion molecule L1
P32004	L1CAM	876	1000	K.DHVVVPAN*TTSVILSGLR@PYSSYHLEVQAFN*GR@.G	2.879	Yes	No	0.25	911.978	4	HVVVPANTTSVIL	3	L1CAM_HUMAN Neural cell adhesion molecule L1
P32004	L1CAM	899	1000	K.DHVVVPAN*TTSVILSGLR@PYSSYHLEVQAFN*GR@.G	2.879	Yes	No	0.25	911.978	4	LEVQAFNGRGSGP	2	L1CAM_HUMAN Neural cell adhesion molecule L1
P32004	L1CAM	931	1000	R.GSGPASEFTFSTPEGVPGHPEALHLECQSN*TSLLLR@.W	4.488	Yes	No	0.36	958.718	4	HLECQSNTSLLLR	2	L1CAM_HUMAN Neural cell adhesion molecule L1
P32004	L1CAM	979	1000	R.THN*LTDLSPHLR.Y	2.725	Yes	Yes	-1.2	703.866	2	PELRTHNLTDLSP	3	L1CAM_HUMAN Neural cell adhesion molecule L1
P32004	L1CAM	1071	1000	K.GGASLSPQYVSYN*QSSYTQWDLQPDTDYEIHLFK#.E	5.16	Yes	No	0.87	1316.95	3	PQYVSYNQSSYTQ	1	L1CAM_HUMAN Neural cell adhesion molecule L1
P35052	GPC1	79	59.298	R.ICPQGYTCCTSEMEENLAN*R@.S	3.333	Yes	Yes	-0.18	814.672	3	MEENLANRSHAEL	4	GPC1_HUMAN Glypican-1
P35052	GPC1	116	1000	R.SFDDHFQHLLN*DSER@.T	3.704	Yes	Yes	0.09	623.618	3	HFQHLLNDSERTL	3	GPC1_HUMAN Glypican-1
P35613	BSG	160	1000	K.ILLTCSLN*DSATEVTGHR@.W	2.521	Yes	Yes	-0.82	666.004	3	LLTCSLNDSATEV	2	BASI_HUMAN Basigin
P36941	LTBR	177	1000	K.AGHFQN*TSSPSAR@.C	2.572	Yes	No	0.57	684.828	2	KAGHFQNTSSPSA	1	TNR3_HUMAN Tumor necrosis factor receptor superfamily member 3
P37235	HPCAL1	75	1000	R.TFDTN*GDGTIDFR@.E	2.126	Yes	No	-0.12	734.333	2	FRTFDTNGDGTID	2	HPCL1_HUMAN Hippocalcin-like protein 1
P40189	IL6ST	157	1000	R.ETHLETN*FTLK#.S	2.393	Yes	No	0.38	672.345	2	ETHLETNFTLKSE	1	IL6RB_HUMAN Interleukin-6 receptor subunit beta
P40189	IL6ST	227	12.431	K.VKPNPPHN*LSVINSEELSSILK.L	3.009	No	Yes	0.37	806.776	3	KPNPPHNLSVINS	1	IL6RB_HUMAN Interleukin-6 receptor subunit beta
P40189	IL6ST	379	1000	K.SHLQN*YTVN*ATK#.L	3.676	Yes	Yes	0.51	695.348	2	WKSHLQNYTVNAT	4	IL6RB_HUMAN Interleukin-6 receptor subunit beta
P40189	IL6ST	383	1000	K.SHLQN*YTVN*ATK#.L	3.676	Yes	Yes	0.51	695.348	2	LQNYTVNATKLTV	2	IL6RB_HUMAN Interleukin-6 receptor subunit beta
P40189	IL6ST	390	37.54	K.LTVN*LTNDR@.Y	2.155	Yes	No	0.1	527.79	2	ATKLTVNLTNDRY	1	IL6RB_HUMAN Interleukin-6 receptor subunit beta
P40199	CEACAM6	224	43.066	K.RNDAGSYECEIQNPASAN*R.S	3.426	No	Yes	0.73	718.984	3	QNPASANRSDPVT	1	CEAM6_HUMAN Carcinoembryonic antigen-related cell adhesion molecule 6
P42892	ECE1	166	1000	K.HLLEN*STASVSEAER@K#.A	4.3	Yes	Yes	0.02	894.464	2	IKHLLENSTASVS	9	ECE1_HUMAN Endothelin-converting enzyme 1
P42892	ECE1	270	59.298	R.DYYLN*KTENEK.V	2.923	Yes	Yes	-0.76	710.329	2	SRDYYLNKTENEK	2	ECE1_HUMAN Endothelin-converting enzyme 1
P42892	ECE1	316	1000	K.LLGGGDEEAIR@PQM^QQILDFETALAN*ITIPQEK#.R	4.802	Yes	No	0.7	1224.64	3	FETALANITIPQE	3	ECE1_HUMAN Endothelin-converting enzyme 1
P42892	ECE1	539	1000	R.FFN*FSWR.V	1.903	No	Yes	1.14	503.738	2	NAMRFFNFSWRVT	1	ECE1_HUMAN Endothelin-converting enzyme 1
P42892	ECE1	651	71.067	K.R@QTECMVEQYSN*YSVNGEPVNGR@.H	4.641	Yes	No	-0.91	911.415	3	MVEQYSNYSVNGE	5	ECE1_HUMAN Endothelin-converting enzyme 1
P42892	ECE1	660	30.07	K.R@QTECMVEQYSN*YSVNGEPVN*GR@.H	4.086	Yes	No	-0.66	912.411	3	VNGEPVNGRHTLG	1	ECE1_HUMAN Endothelin-converting enzyme 1
P43007	SLC1A4	201	1000	K.VVTQN*SSSGN*VTHEK.I	2.347	No	Yes	0.01	796.88	2	YKVVTQNSSSGNV	2	SATT_HUMAN Neutral amino acid transporter A
P43007	SLC1A4	206	1000	K.VVTQN*SSSGN*VTHEK.I	2.347	No	Yes	0.01	796.88	2	QNSSSGNVTHEKI	2	SATT_HUMAN Neutral amino acid transporter A
P43121	MCAM	56	1000	K.CGLSQSQGN*LSHVDWFSVHK#.E	4.28	Yes	No	3.04	1149.04	2	LSQSQGNLSHVDW	1	MUC18_HUMAN Cell surface glycoprotein MUC18
P43121	MCAM	418	1000	R.CVASVPSIPGLN*R@.T	2.128	Yes	No	0.67	689.871	2	PSIPGLNRTQLVN	1	MUC18_HUMAN Cell surface glycoprotein MUC18
P46977	STT3A	548	9.34	R.TILVDNNTWN*NTHISR.V	4.388	Yes	Yes	-0.4	950.973	2	VDNNTWNNTHISR	2	STT3A_HUMAN Dolichyl-diphosphooligosaccharide--protein glycosyltransferase subunit STT3A
P48509	CD151	159	1000	R.YHQPGHEAVTSAVDQLQQEFHCCGSN*N*SQDWR@.D	5.792	Yes	No	-0.9	950.159	4	FHCCGSNNSQDWR	6	CD151_HUMAN CD151 antigen
P48960	CD97	33	1000	R.WCPQN*SSCVN*ATACR@.C	3.8	Yes	No	-1.18	911.872	2	ARWCPQNSSCVNA	3	CD97_HUMAN CD97 antigen
P48960	CD97	38	1000	R.WCPQN*SSCVN*ATACR@.C	3.8	Yes	Yes	-1.18	911.872	2	QNSSCVNATACRC	5	CD97_HUMAN CD97 antigen
P48960	CD97	108	95.273	K.TFK#N*ESEN*TCQDVDECQQNPR@.L	4.555	Yes	Yes	0.32	873.702	3	GAKTFKNESENTC	6	CD97_HUMAN CD97 antigen
P48960	CD97	112	101.974	K.TFK#N*ESEN*TCQDVDECQQNPR@.L	4.555	Yes	No	0.32	873.702	3	FKNESENTCQDVD	2	CD97_HUMAN CD97 antigen
P48960	CD97	371	1000	R.GDK#N*VTMGQSSAR@.M	2.393	Yes	No	1.8	684.338	2	QERGDKNVTMGQS	6	CD97_HUMAN CD97 antigen
P48960	CD97	453	30.835	R.R@LSAVNSIFLSHN*NTK#.E	4.932	Yes	No	0.83	606.67	3	SIFLSHNNTKELN	5	CD97_HUMAN CD97 antigen
P48960-2	CD97	108	31.769	K.TFK#N*ESENTCQDVDECSSGQHQCDSSTVCFNTVGSYSCR@.C	4.376	Yes	No	0.23	1150.21	4	GAKTFKNESENTC	2	CD97_HUMAN Isoform 2 of CD97 antigen
P50895	BCAM	439	1000	R.TQN*FTLLVQGSPELK#.T	2.89	Yes	Yes	0.76	843.459	2	VLSRTQNFTLLVQ	4	BCAM_HUMAN Basal cell adhesion molecule
P50990	CCT8	50	24.243	R.TAYGPN*GMNK#.M	2.781	Yes	Yes	0.43	532.247	2	RTAYGPNGMNKMV	2	TCPQ_HUMAN T-complex protein 1 subunit theta
P51511	MMP15	150	101.896	K.WNNHHLTFSIQN*YTEK.L	3.328	No	Yes	0.59	678.99	3	LTFSIQNYTEKLG	2	MMP15_HUMAN Matrix metalloproteinase-15
P51805	PLXNA3	1009	1000	R.AN*ISSPGLIYTYTQDPTVTR.L	3.595	Yes	Yes	3.69	1100.56	2	LAIDRANISSPGL	3	PLXA3_HUMAN Plexin-A3
P52798	EFNA4	33	13.38	R.HVVYWN*SSNPR.L	1.992	No	Yes	1.53	681.329	2	RHVVYWNSSNPRL	1	EFNA4_HUMAN Ephrin-A4
P54289	CACNA2D1	781	207.714	K.R@SLDNDNYVFTAPYFN*K#.S	5.062	Yes	No	1.34	1041.01	2	FTAPYFNKSGPGA	4	CA2D1_HUMAN Voltage-dependent calcium channel subunit alpha-2/delta-1
P54289	CACNA2D1	888	1000	R.HLVN*ISVYAFN*K#.S	3.227	Yes	No	-0.11	709.881	2	LMRHLVNISVYAF	2	CA2D1_HUMAN Voltage-dependent calcium channel subunit alpha-2/delta-1
P54289	CACNA2D1	895	1000	R.HLVN*ISVYAFN*K#.S	3.227	Yes	No	-0.11	709.881	2	ISVYAFNKSYDYQ	2	CA2D1_HUMAN Voltage-dependent calcium channel subunit alpha-2/delta-1
P54709	ATP1B3	124	1000	K.FLK#PYTLEEQK#N*LTVCPDGALFEQK#.G	3.083	Yes	Yes	-0.05	999.186	3	TLEEQKNLTVCPD	4	AT1B3_HUMAN Sodium/potassium-transporting ATPase subunit beta-3
P54709	ATP1B3	240	9.34	K.K#LHVGYLQPLVAVQVSFAPN*NTGK#.E	4.011	Yes	No	0.26	867.154	3	QVSFAPNNTGKEV	2	AT1B3_HUMAN Sodium/potassium-transporting ATPase subunit beta-3
P54753	EPHB3	445	44.278	R.YAAVN*ITTNQAAPSEVPTLR@.L	4.138	Yes	No	2.14	1063.06	2	PRYAAVNITTNQA	1	EPHB3_HUMAN Ephrin type-B receptor 3
P54760	EPHB4	335	1000	R.LN*GSSLHLEWSAPLESGGR@.E	3.902	Yes	Yes	0.16	1010.01	2	SVVSRLNGSSLHL	4	EPHB4_HUMAN Ephrin type-B receptor 4
P54803	GALC	143	13.38	K.K#R@NPN*ITLIGLPWSFPGWLGK#.G	3.38	Yes	Yes	0.45	807.132	3	AKKRNPNITLIGL	2	GALC_HUMAN Galactocerebrosidase
P54852	EMP3	47	24.437	K.ESLNLWYDCTWNN*DTK#.T	2.985	Yes	No	1.28	1035.45	2	YDCTWNNDTKTWA	1	EMP3_HUMAN Epithelial membrane protein 3
P55899	FCGRT	125	1000	K.GPYTLQGLLGCELGPDN*TSVPTAK#.F	4.044	Yes	No	1.34	1250.13	2	CELGPDNTSVPTA	1	FCGRN_HUMAN IgG receptor FcRn large subunit p51
P56159	GFRA1	59	1000	K.ETN*FSLASGLEAK.D	3.397	No	Yes	0.83	685.341	2	VAGKETNFSLASG	1	GFRA1_HUMAN GDNF family receptor alpha-1
P56159	GFRA1	406	22.011	K.SN*VSGNTHLCISNGNYEK.E	4.833	No	Yes	0.13	998.95	2	AQKLKSNVSGNTH	3	GFRA1_HUMAN GDNF family receptor alpha-1
P56159	GFRA1	417	30.835	K.SN*VSGNTHLCISN*GNYEK.E	5.69	No	Yes	-1.83	1000.44	2	THLCISNGNYEKE	1	GFRA1_HUMAN GDNF family receptor alpha-1
P56199	ITGA1	217	6.591	K.QTQVGIVQYGEN*VTHEFNLNK#.Y	2.82	Yes	No	-0.27	810.407	3	IVQYGENVTHEFN	1	ITA1_HUMAN Integrin alpha-1
P56199	ITGA1	532	1000	K.VYVYALN*QTR@.F	2.92	Yes	No	0.41	618.334	2	VYVYALNQTRFEY	2	ITA1_HUMAN Integrin alpha-1
P62841	RPS15	98	1000	R.DMIILPEMVGSMVGVYN*GK#.T	4.719	Yes	Yes	1.98	1032.52	2	SMVGVYNGKTFNQ	3	RS15_HUMAN 40S ribosomal protein S15
P62937	PPIA	108	31.275	K.HTGPGILSM^ANAGPNTN*GSQFFICTAK#.T	4.18	Yes	No	-0.26	940.113	3	NAGPNTNGSQFFI	10	PPIA_HUMAN Peptidyl-prolyl cis-trans isomerase A
P78310	CXADR	106	53.534	K.SGDASIN*VTNLQLSDIGTYQCK#.V	3.077	Yes	No	1.67	1198.08	2	SGDASINVTNLQL	1	CXAR_HUMAN Coxsackievirus and adenovirus receptor
P78325	ADAM8	436	1000	R.CCN*STTCQLAEGAQCAHGTCCQECK#.V	5.083	Yes	No	-0.11	1001.37	3	CRNRCCNSTTCQL	2	ADAM8_HUMAN Disintegrin and metalloproteinase domain-containing protein 8
P78536	ADAM17	103	1000	K.VVVVDGKN*ESEYTVK.W	2.965	No	Yes	-0.13	834.932	2	VVVDGKNESEYTV	1	ADA17_HUMAN Disintegrin and metalloproteinase domain-containing protein 17
P78536	ADAM17	551	66.299	K.GVSYCTGN*SSECPPPGNAEDDTVCLDLGK#.C	2.761	Yes	No	-0.08	1037.44	3	VSYCTGNSSECPP	3	ADA17_HUMAN Disintegrin and metalloproteinase domain-containing protein 17
P78536	ADAM17	594	44.278	R.EQQLESCACN*ETDNSCK.V	4.223	No	Yes	-0.19	1038.4	2	LESCACNETDNSC	2	ADA17_HUMAN Disintegrin and metalloproteinase domain-containing protein 17
P98172	EFNB1	139	161.681	K.HHDYYITSTSN*GSLEGLENR.E	3.894	Yes	Yes	-0.15	766.017	3	YITSTSNGSLEGL	5	EFNB1_HUMAN Ephrin-B1
Q01973	ROR1	66	0	K.DSYLTLDEPMNN*ITTSLGQTAELHCK#.V	3.465	Yes	No	0.96	988.132	3	LDEPMNNITTSLG	2	ROR1_HUMAN Tyrosine-protein kinase transmembrane receptor ROR1
Q01973	ROR1	315	1000	K.CYN*STGVDYR@.G	1.514	Yes	No	-0.46	622.265	2	KNHKCYNSTGVDY	2	ROR1_HUMAN Tyrosine-protein kinase transmembrane receptor ROR1
Q02878	RPL6	279	1000	R.SVFALTN*GIYPHK.L	2.667	No	Yes	1.86	725.386	2	SVFALTNGIYPHK	4	RL6_HUMAN 60S ribosomal protein L6
Q03405	PLAUR	222	1000	K.GN*STHGCSSEETFLIDCR@.G	2.881	Yes	No	-0.1	693.629	3	CYSCKGNSTHGCS	3	UPAR_HUMAN Urokinase plasminogen activator surface receptor
Q04721	NOTCH2	46	36.684	R.DGYEPCVNEGMCVTYHN*GTGYCK#.C	2.338	Yes	No	-0.08	908.027	3	MCVTYHNGTGYCK	2	NOTC2_HUMAN Neurogenic locus notch homolog protein 2
Q04771	ACVR1	102	5.085	K.TPPSPGQAVECCQGDWCNR@N*ITAQLPTK#.G	3.557	Yes	No	1.14	1068.17	3	GDWCNRNITAQLP	4	ACVR1_HUMAN Activin receptor type-1
Q07954	LRP1	446	1000	R.FN*STEYQVVTR@.V	3.358	Yes	No	0.26	676.838	2	IRVNRFNSTEYQV	1	LRP1_HUMAN Prolow-density lipoprotein receptor-related protein 1
Q07954	LRP1	1511	1000	K.WTGHN*VTVVQR@.T	2.759	Yes	No	-0.77	653.348	2	NKWTGHNVTVVQR	1	LRP1_HUMAN Prolow-density lipoprotein receptor-related protein 1
Q07954	LRP1	3089	73.311	R.MHLN*GSNVQVLHR@.T	4.287	Yes	No	1.54	757.399	2	IRRMHLNGSNVQV	1	LRP1_HUMAN Prolow-density lipoprotein receptor-related protein 1
Q08174	PCDH1	305	101.329	K.AN*DSDQGANAEIEYTFHQAPEVVR.R	4.442	Yes	Yes	0.34	888.74	3	VIQVKANDSDQGA	4	PCDH1_HUMAN Protocadherin-1
Q08380	LGALS3BP	69	1000	R.ALGFEN*ATQALGR.A	2.306	No	Yes	0.69	675.849	2	RALGFENATQALG	2	LG3BP_HUMAN Galectin-3-binding protein
Q08380	LGALS3BP	580	1000	R.TVIR@PFYLTN*SSGVD.-	2.645	Yes	No	0.55	839.438	2	RPFYLTNSSGVD	1	LG3BP_HUMAN Galectin-3-binding protein
Q08722	CD47	73	1000	K.GRDIYTFDGALN*K.S	2.978	Yes	Yes	0.14	736.867	2	TFDGALNKSTVPT	3	CD47_HUMAN Leukocyte surface antigen CD47
Q08722	CD47	111	1000	K.SDAVSHTGN*YTCEVTELTR@.E	4.396	Yes	Yes	1.09	1074.99	2	AVSHTGNYTCEVT	6	CD47_HUMAN Leukocyte surface antigen CD47
Q10589	BST2	65	1000	R.N*VTHLLQQELTEAQK#.G	4.728	Yes	No	0.36	881.97	2	AVMECRNVTHLLQ	2	BST2_HUMAN Bone marrow stromal antigen 2
Q10589	BST2	92	1000	K.GFQDVEAQAATCN*HTVM^ALMASLDAEK#.A	3.877	Yes	No	-0.78	979.112	3	AQAATCNHTVMAL	5	BST2_HUMAN Bone marrow stromal antigen 2
Q12907	LMAN2	183	0	R.VFPYISVMVNN*GSLSYDHSK.D	4.024	No	Yes	3.34	1130.55	2	ISVMVNNGSLSYD	1	LMAN2_HUMAN Vesicular integral-membrane protein VIP36
Q12913	PTPRJ	142	1000	K.SN*DTAASEYK#.Y	2.325	Yes	No	-2.09	548.741	2	ILTWKSNDTAASE	1	PTPRJ_HUMAN Receptor-type tyrosine-protein phosphatase eta
Q12913	PTPRJ	172	1000	K.TITVVHQPWCN*ITGLR@PATSYVFSITPGIGN*ETWGDPR@.V	3.749	Yes	No	0.01	1065.54	4	VHQPWCNITGLRP	1	PTPRJ_HUMAN Receptor-type tyrosine-protein phosphatase eta
Q12913	PTPRJ	192	1000	K.TITVVHQPWCN*ITGLR@PATSYVFSITPGIGN*ETWGDPR@.V	3.749	Yes	No	0.01	1065.54	4	ITPGIGNETWGDP	1	PTPRJ_HUMAN Receptor-type tyrosine-protein phosphatase eta
Q12913	PTPRJ	231	6.591	K.AALSWSNGN*GTASCR@.V	2.241	Yes	No	0.06	780.856	2	LSWSNGNGTASCR	2	PTPRJ_HUMAN Receptor-type tyrosine-protein phosphatase eta
Q12913	PTPRJ	258	117.312	R.LQVN*ISGLK#PGVQYNINPYLLQSN*K#.T	6.423	Yes	No	0.26	941.519	3	DSRLQVNISGLKP	2	PTPRJ_HUMAN Receptor-type tyrosine-protein phosphatase eta
Q12913	PTPRJ	278	49.59	R.LQVN*ISGLK#PGVQYNINPYLLQSN*K#.T	6.423	Yes	No	0.26	941.519	3	PYLLQSNKTKGDP	2	PTPRJ_HUMAN Receptor-type tyrosine-protein phosphatase eta
Q12913	PTPRJ	342	1000	R.YN*ATVYSQAAN*GTEGQPQAIEFR@.T	4.675	Yes	Yes	0.03	1264.09	2	EPGTRYNATVYSQ	6	PTPRJ_HUMAN Receptor-type tyrosine-protein phosphatase eta
Q12913	PTPRJ	351	1000	R.YN*ATVYSQAAN*GTEGQPQAIEFR@.T	4.675	Yes	Yes	0.03	1264.09	2	VYSQAANGTEGQP	6	PTPRJ_HUMAN Receptor-type tyrosine-protein phosphatase eta
Q12913	PTPRJ	391	1000	K.VSDN*ESSSN*YTYK#.I	2.763	Yes	Yes	0.94	754.319	2	IWKVSDNESSSNY	3	PTPRJ_HUMAN Receptor-type tyrosine-protein phosphatase eta
Q12913	PTPRJ	396	1000	K.VSDN*ESSSN*YTYK#.I	2.763	Yes	Yes	0.94	754.319	2	DNESSSNYTYKIH	3	PTPRJ_HUMAN Receptor-type tyrosine-protein phosphatase eta
Q12913	PTPRJ	413	76.733	K.IHVAGETDSSNLN*VSEPR@.A	5.313	Yes	Yes	-0.98	645.319	3	TDSSNLNVSEPRA	4	PTPRJ_HUMAN Receptor-type tyrosine-protein phosphatase eta
Q12913	PTPRJ	431	1000	R.SSTFYN*ITVCPVLGDIEGTPGFLQVHTPPVPVSDFR@.V	4.996	Yes	No	0.68	1319.33	3	RSSTFYNITVCPV	2	PTPRJ_HUMAN Receptor-type tyrosine-protein phosphatase eta
Q12913	PTPRJ	824	28.218	R.NTCTTGITDPPPPDGSPN*ITSVSHNSVK#.V	3.137	Yes	No	0.37	968.794	3	PPDGSPNITSVSH	4	PTPRJ_HUMAN Receptor-type tyrosine-protein phosphatase eta
Q13200	PSMD2	378	59.298	R.MNLASSFVN*GFVNAAFGQDK#.L	5.284	Yes	Yes	-0.48	1064.51	2	LASSFVNGFVNAA	6	PSMD2_HUMAN 26S proteasome non-ATPase regulatory subunit 2
Q13308	PTK7	116	76.733	R.SAN*ASFNIK#.W	2.195	Yes	Yes	0.11	481.75	2	EEARSANASFNIK	3	PTK7_HUMAN Inactive tyrosine-protein kinase 7
Q13308	PTK7	175	1000	R.DGTPLSDGQSN*HTVSSK#.E	3.767	Yes	Yes	0.1	870.904	2	LSDGQSNHTVSSK	4	PTK7_HUMAN Inactive tyrosine-protein kinase 7
Q13308	PTK7	283	1000	R.ATVFAN*GSLLLTQVR@PR@.N	2.369	Yes	No	-0.12	929.545	2	RATVFANGSLLLT	2	PTK7_HUMAN Inactive tyrosine-protein kinase 7
Q13308	PTK7	405	1000	R.R@QDVN*ITVATVPSWLK#.K	4.21	Yes	No	0.06	922.521	2	QRRQDVNITVATV	1	PTK7_HUMAN Inactive tyrosine-protein kinase 7
Q13308	PTK7	567	93.154	R.DDAGN*YTCIASNGPQGQIR@.A	3.852	Yes	No	1.73	1023.46	2	TRDDAGNYTCIAS	2	PTK7_HUMAN Inactive tyrosine-protein kinase 7
Q13308	PTK7	646	1000	R.MHIFQN*GSLVIHDVAPEDSGR@.Y	4.26	Yes	No	1.3	777.719	3	RMHIFQNGSLVIH	3	PTK7_HUMAN Inactive tyrosine-protein kinase 7
Q13332	PTPRS	263	11.015	R.FSILPMSHEIMPGGNVN*ITCVAVGSPMPYVK#.W	4.383	Yes	No	4.28	1119.56	3	MPGGNVNITCVAV	1	PTPRS_HUMAN Receptor-type tyrosine-protein phosphatase S
Q13332	PTPRS	733	1000	R.KVEAEALN*ATAIR.V	2.809	Yes	Yes	0.24	694.885	2	VEAEALNATAIRV	2	PTPRS_HUMAN Receptor-type tyrosine-protein phosphatase S
Q13421	MSLN	388	1000	R.K#WN*VTSLETLK#.A	2.191	Yes	No	0.82	669.381	2	EDIRKWNVTSLET	1	MSLN_HUMAN Mesothelin
Q13421	MSLN	496	30.835	R.LAFQNMN*GSEYFVK#.I	2.6	Yes	No	0.5	829.897	2	LAFQNMNGSEYFV	1	MSLN_HUMAN Mesothelin
Q13433	SLC39A6	67	24.437	R.YGEN*NSLSVEGFR@.K	3.109	Yes	No	1.33	740.849	2	FYRYGENNSLSVE	2	S39A6_HUMAN Zinc transporter ZIP6
Q13433	SLC39A6	266	71.753	R.NTNENPQECFN*ASK#.L	3.662	Yes	No	-0.25	832.353	2	NPQECFNASKLLT	1	S39A6_HUMAN Zinc transporter ZIP6
Q13433	SLC39A6	283	89.827	K.LLTSHGMGIQVPLN*ATEFN*YLCPAIINQIDAR@.S	5.621	Yes	No	12.55	1194.63	3	GIQVPLNATEFNY	4	S39A6_HUMAN Zinc transporter ZIP6
Q13641	TPBG	81	1000	R.N*LTEVPTDLPAYVR.N	2.604	Yes	Yes	0.19	795.917	2	VKCVNRNLTEVPT	3	TPBG_HUMAN Trophoblast glycoprotein
Q13641	TPBG	166	20.354	R.QLDLSHNPLADLSPFAFSGSN*ASVSAPSPLVELILNHIVPPEDERQN*R.S	4.422	No	Yes	0.95	1300.16	4	FAFSGSNASVSAP	1	TPBG_HUMAN Trophoblast glycoprotein
Q13641	TPBG	192	8.07	R.QLDLSHNPLADLSPFAFSGSN*ASVSAPSPLVELILNHIVPPEDERQN*R.S	4.422	No	Yes	0.95	1300.16	4	PEDERQNRSFEGM	1	TPBG_HUMAN Trophoblast glycoprotein
Q13641	TPBG	256	148.282	R.N*LTHLESLHLEDNALK.V	3.758	Yes	Yes	0.92	925.481	2	TYVSFRNLTHLES	7	TPBG_HUMAN Trophoblast glycoprotein
Q13641	TPBG	275	1000	K.VLHN*GTLAELQGLPHIR.V	4.292	Yes	Yes	-0.49	936.022	2	ALKVLHNGTLAEL	6	TPBG_HUMAN Trophoblast glycoprotein
Q13740	ALCAM	95	97.748	K.DRLNLSEN*YTLSISNAR.I	4.758	Yes	Yes	-5.21	984.992	2	RLNLSENYTLSIS	4	CD166_HUMAN CD166 antigen
Q13740	ALCAM	167	1000	K.K#LGDCISEDSYPDGN*ITWYR@.N	2.793	Yes	Yes	-0.66	802.704	3	DSYPDGNITWYRN	7	CD166_HUMAN CD166 antigen
Q13740	ALCAM	265	87.265	K.NAIK#EGDN*ITLK#.C	2.998	Yes	No	0.29	667.873	2	AIKEGDNITLKCL	1	CD166_HUMAN CD166 antigen
Q13740	ALCAM	480	120.756	K.IIISPEEN*VTLTCTAENQLER@.T	4.031	Yes	Yes	-0.27	1220.12	2	IISPEENVTLTCT	7	CD166_HUMAN CD166 antigen
Q13740	ALCAM	499	37.54	R.TVNSLN*VSAISIPEHDEADEISDENR@EK#.V	4.611	Yes	Yes	0.61	1043.5	3	RTVNSLNVSAISI	7	CD166_HUMAN CD166 antigen
Q13740-2	ALCAM	499	53.534	R.TVNSLN*VSANENR@.E	3.211	Yes	Yes	0.2	713.859	2	RTVNSLNVSANEN	3	CD166_HUMAN Isoform 2 of CD166 antigen
Q13873	BMPR2	55	1000	R.ISHEN*GTILCSK#.G	3.343	Yes	No	1.73	685.343	2	SRISHENGTILCS	1	BMPR2_HUMAN Bone morphogenetic protein receptor type-2
Q14108	SCARB2	105	76.287	K.ANIQFGDN*GTTISAVSNK.A	4.201	No	Yes	0.2	920.452	2	NIQFGDNGTTISA	1	SCRB2_HUMAN Lysosome membrane protein 2
Q14118	DAG1	641	1000	K.LAFAFGDR@N*CSTITLQN*ITR@.G	2.653	Yes	No	0.21	772.733	3	FAFGDRNCSTITL	2	DAG1_HUMAN Dystroglycan
Q14118	DAG1	649	1000	K.LAFAFGDR@N*CSTITLQN*ITR@.G	2.653	Yes	No	0.21	772.733	3	STITLQNITRGSI	2	DAG1_HUMAN Dystroglycan
Q14126	DSG2	182	150.768	K.IN*ATDADEPNTLNSK#.I	4.253	Yes	Yes	1.13	807.386	2	TLVMKINATDADE	3	DSG2_HUMAN Desmoglein-2
Q14126	DSG2	462	1000	R.YVQN*GTYTVK.I	2.027	Yes	Yes	0.24	588.295	2	ESRYVQNGTYTVK	2	DSG2_HUMAN Desmoglein-2
Q14517	FAT1	1940	1000	K.TGALTVQN*TTQLR@.S	2.8	Yes	No	0.67	706.391	2	GALTVQNTTQLRS	3	FAT1_HUMAN Protocadherin Fat 1
Q14517	FAT1	3640	1000	R.QVTQEMLN*HTIAIR@.F	2.959	Yes	No	0.54	831.945	2	VTQEMLNHTIAIR	1	FAT1_HUMAN Protocadherin Fat 1
Q14997	PSME4	346	7.71	K.HLAGLFNSITSFYHPSNN*GR@.W	4.246	Yes	No	0.04	747.706	3	FYHPSNNGRWLNK	2	PSME4_HUMAN Proteasome activator complex subunit 4
Q15223	PVRL1	202	36.655	R.NPN*GTVTVISR@.Y	2.258	Yes	Yes	-1.27	583.821	2	QEIRNPNGTVTVI	5	PVRL1_HUMAN Poliovirus receptor-related protein 1
Q15223	PVRL1	286	138.848	K.ADANPPATEYHWTTLN*GSLPK.G	3.725	Yes	Yes	2.42	1143.55	2	YHWTTLNGSLPKG	2	PVRL1_HUMAN Poliovirus receptor-related protein 1
Q15758	SLC1A5	212	1000	R.SYSTTYEER@N*ITGTR@.V	2.863	Yes	Yes	-0.04	896.935	2	TTYEERNITGTRV	4	AAAT_HUMAN Neutral amino acid transporter B(0)
Q16563	SYPL1	71	115.01	K.GQTEIQVNCPPAVTEN*K#.T	4.772	Yes	Yes	0.78	948.462	2	PPAVTENKTVTAT	6	SYPL1_HUMAN Synaptophysin-like protein 1
Q16563	SYPL1	96	17.25	R.LNEASFQPPPGVN*ICDVNWK#.D	3.182	Yes	No	1.68	1148.56	2	QPPPGVNICDVNW	1	SYPL1_HUMAN Synaptophysin-like protein 1
Q24JP5	TMEM132A	71	1000	R.VQQVGHYPPAN*SSLSSR.S	3.563	Yes	Yes	0.91	915.456	2	GHYPPANSSLSSR	4	T132A_HUMAN Transmembrane protein 132A
Q29980	MICB	164	24.243	R.AQTLAMN*VTNFWK#.E	2.751	Yes	No	0.54	767.889	2	AQTLAMNVTNFWK	1	MICB_HUMAN MHC class I polypeptide-related sequence B
Q29980	MICB	261	121.502	R.QDGVSLSHNTQQWGDVLPDGN*GTYQTWVATR@.I	4.179	Yes	No	2.47	1147.21	3	DVLPDGNGTYQTW	3	MICB_HUMAN MHC class I polypeptide-related sequence B
Q29983	MICA	79	1000	R.AK#PQGQWAEDVLGN*K#.T	3.456	Yes	No	0.58	553.957	3	AEDVLGNKTWDRE	1	MICA_HUMAN MHC class I polypeptide-related sequence A
Q29983	MICA	125	1000	R.VCEIHEDN*STR.S	2.374	No	Yes	2.08	681.797	2	CEIHEDNSTRSSQ	1	MICA_HUMAN MHC class I polypeptide-related sequence A
Q29983	MICA	220	1000	R.SEASEGN*ITVTCR.A	2.447	No	Yes	0.53	713.822	2	SEASEGNITVTCR	2	MICA_HUMAN MHC class I polypeptide-related sequence A
Q29983	MICA	261	1000	R.QDGVSLSHDTQQWGDVLPDGN*GTYQTWVATR@.I	4.727	Yes	No	0.53	1147.54	3	DVLPDGNGTYQTW	1	MICA_HUMAN MHC class I polypeptide-related sequence A
Q29983	MICA	289	1000	R.FTCYMEHSGN*HSTHPVPSGK#.V	4.253	Yes	No	-0.25	1142.5	2	YMEHSGNHSTHPV	3	MICA_HUMAN MHC class I polypeptide-related sequence A
Q3MIR4	TMEM30B	273	1000	R.QGN*YSAGLPR.G	1.905	No	Yes	-0.44	533.264	2	ARIRQGNYSAGLP	1	CC50B_HUMAN Cell cycle control protein 50B
Q4KMG0	CDON	287	38.133	R.LYSHLATDSVDPADSGN*YSCMAGNK#.S	3.795	Yes	No	-0.98	895.39	3	DPADSGNYSCMAG	3	CDON_HUMAN Cell adhesion molecule-related/down-regulated by oncogenes
Q4KMQ2	ANO6	493	19.843	K.NIN*GTDPIQK#.Y	2.038	Yes	No	-0.34	555.792	2	KLPKNINGTDPIQ	1	ANO6_HUMAN Anoctamin-6
Q4KMQ2	ANO6	802	75.738	K.SK#GNPYSDLGN*HTTCR@.Y	3.374	Yes	Yes	0.84	608.619	3	PYSDLGNHTTCRY	2	ANO6_HUMAN Anoctamin-6
Q5SZK8	FREM2	2236	118.011	R.LVLGTPQSNSPFGAAVGEQN*ETLIR.I	4.473	No	Yes	0.76	1301.17	2	AAVGEQNETLIRI	1	FREM2_HUMAN FRAS1-related extracellular matrix protein 2
Q5VUB5	FAM171A1	190	1000	R.GLDGN*GTGN*STR@.H	2.11	Yes	No	0.84	580.767	2	LRGLDGNGTGNST	1	F1711_HUMAN Protein FAM171A1
Q5VUB5	FAM171A1	194	1000	R.GLDGN*GTGN*STR@.H	2.11	Yes	No	0.84	580.767	2	DGNGTGNSTRHDL	1	F1711_HUMAN Protein FAM171A1
Q5VW38	GPR107	169	73.616	K.VLGQSQEPNVNPASAGN*QTQK.T	3.228	No	Yes	0.45	724.026	3	NPASAGNQTQKTQ	4	GP107_HUMAN Protein GPR107
Q5VY80	RAET1L	68	1000	K.TFLHYDCGN*K#.T	2.545	Yes	No	0.55	633.284	2	LHYDCGNKTVTPV	1	RET1L_HUMAN Retinoic acid early transcript 1L protein
Q5ZPR3	CD276	91	1000	K.QLVHSFAEGQDQGSAYAN*R.T	3.239	Yes	Yes	1.21	694.325	3	QGSAYANRTALFP	16	CD276_HUMAN CD276 antigen
Q5ZPR3	CD276	104	1000	R.TALFPDLLAQGN*ASLR@.L	3.251	Yes	Yes	-0.37	848.466	2	DLLAQGNASLRLQ	11	CD276_HUMAN CD276 antigen
Q5ZPR3	CD276	215	1000	R.VVLGAN*GTYSCLVR.N	3.049	Yes	Yes	0.44	756.393	2	RVVLGANGTYSCL	6	CD276_HUMAN CD276 antigen
Q6DU44	HLA-E	107	1000	R.GYYN*QSEAGSHTLQWMHGCELGPDGR@.F	3.926	Yes	No	0.98	987.096	3	TLRGYYNQSEAGS	2	Q6DU44_HUMAN HLA class I histocompatibility antigen, alpha chain E
Q6EMK4	VASN	117	1000	R.LHEITN*ETFR@.G	2.941	Yes	No	0.3	634.827	2	RLHEITNETFRGL	2	VASN_HUMAN Vasorin
Q6EMK4	VASN	528	1000	R.LPASLAEYTVTQLR@PN*ATYSVCVMPLGPGR@.V	4.997	Yes	No	-0.15	1092.91	3	VTQLRPNATYSVC	2	VASN_HUMAN Vasorin
Q6H3X3	RAET1G	82	1000	K.K#LN*VTTAWK#.A	2.125	Yes	No	0.17	540.32	2	PLGKKLNVTTAWK	2	RET1G_HUMAN Retinoic acid early transcript 1G protein
Q6P4F1	FUT10	168	1000	K.LFHK#PVITLFN*YTATFSR@.H	3.398	Yes	No	-1.15	724.735	3	PVITLFNYTATFS	1	FUT10_HUMAN Alpha-(1,3)-fucosyltransferase 10
Q6PIU2	NCEH1	287	1000	R.AR@LN*WTSLLPASFTK#.N	3.565	Yes	No	-0.15	861.486	2	AVRARLNWTSLLP	2	NCEH1_HUMAN Neutral cholesterol ester hydrolase 1
Q6UVK1	CSPG4	1202	1000	R.AGQPATAFSQQDLLDGAVLYSHN*GSLSPR@.D	3.9	Yes	No	0.83	1003.84	3	AVLYSHNGSLSPR	4	CSPG4_HUMAN Chondroitin sulfate proteoglycan 4
Q6UX71	PLXDC2	316	143.61	K.ITN*ISAVEMTPLPTCLQFNR.C	4.373	No	Yes	-0.03	1154.58	2	QMSKITNISAVEM	3	PXDC2_HUMAN Plexin domain-containing protein 2
Q6UXD5	SEZ6L2	247	1000	R.LLAN*SSMLGEGQVLR.S	3.392	Yes	Yes	0.48	795.924	2	APRLLANSSMLGE	3	SE6L2_HUMAN Seizure 6-like protein 2
Q6UXD5	SEZ6L2	373	1000	R.IVSPEPGGAVGPN*LTCR.W	2.81	No	Yes	0.09	863.938	2	GGAVGPNLTCRWV	1	SE6L2_HUMAN Seizure 6-like protein 2
Q6UXG2	KIAA1324	391	0	K.TNN*STCQPCPYGSYSN*GSDCTR.C	4.45	No	Yes	0	1266.48	2	GFFKTNNSTCQPC	3	K1324_HUMAN UPF0577 protein KIAA1324
Q6UXG2	KIAA1324	404	132.718	K.TNN*STCQPCPYGSYSN*GSDCTR.C	4.45	No	Yes	0	1266.48	2	PYGSYSNGSDCTR	3	K1324_HUMAN UPF0577 protein KIAA1324
Q6V0I7	FAT4	483	118.201	R.VN*LSEEAPPGSYVSGISATDGDSGLNANLR@.Y	4.32	Yes	No	1.36	1000.49	3	QQVYRVNLSEEAP	3	FAT4_HUMAN Protocadherin Fat 4
Q6V0I7	FAT4	676	84.609	R.IN*VSLLDINDNSPVFYPVQYFAHIK#.E	4.019	Yes	No	-0.55	973.175	3	SSMARINVSLLDI	2	FAT4_HUMAN Protocadherin Fat 4
Q6V0I7	FAT4	2921	132.105	R.IN*ATTGEIFNK#.Q	2.447	Yes	No	0.5	609.821	2	SEYFRINATTGEI	2	FAT4_HUMAN Protocadherin Fat 4
Q6YHK3	CD109	513	62.715	K.QN*STMFSLTPENSWTPK.A	3.634	No	Yes	1.7	985.958	2	VAVGKQNSTMFSL	1	CD109_HUMAN CD109 antigen
Q6ZUK4	TMEM26	110	146.622	R.KEDFN*QTLTSNEQTSR.A	4.646	No	Yes	0.79	950.943	2	SRKEDFNQTLTSN	2	TMM26_HUMAN Transmembrane protein 26
Q7KYR7	BTN2A1	114	1000	R.GSVALVIHN*ITAQEN*GTYR@.C	5.308	Yes	No	0.79	1028.03	2	VALVIHNITAQEN	1	BT2A1_HUMAN Butyrophilin subfamily 2 member A1
Q7KYR7	BTN2A1	120	1000	R.GSVALVIHN*ITAQEN*GTYR@.C	5.308	Yes	No	0.79	1028.03	2	NITAQENGTYRCY	1	BT2A1_HUMAN Butyrophilin subfamily 2 member A1
Q7LGA3	HS2ST1	108	1000	K.YHVLHIN*TTK.N	2.962	No	Yes	-1.29	410.223	3	YHVLHINTTKNNP	1	HS2ST_HUMAN Heparan sulfate 2-O-sulfotransferase 1
Q7Z4F1	LRP10	56	1000	R.TSPAN*CTWLILGSK#.E	2.403	Yes	No	-0.44	779.899	2	SRTSPANCTWLIL	1	LRP10_HUMAN Low-density lipoprotein receptor-related protein 10
Q7Z4F1	LRP10	299	1000	R.GFN*ATYHVR@.G	2.757	Yes	No	-1.02	537.271	2	SNGRGFNATYHVR	1	LRP10_HUMAN Low-density lipoprotein receptor-related protein 10
Q7Z570	ZNF804A	32	1000	K.GVFR@GPLSKN*GN*KTLDYAEK.E	2.84	Yes	No	-0.18	736.057	3	RGPLSKNGNKTLD	1	Z804A_HUMAN Zinc finger protein 804A
Q7Z570	ZNF804A	34	1000	K.GVFR@GPLSKN*GN*KTLDYAEK.E	2.84	Yes	No	-0.18	736.057	3	PLSKNGNKTLDYA	1	Z804A_HUMAN Zinc finger protein 804A
Q7Z5N4	SDK1	782	62.528	R.TN*QSIMVQWQPPPETEHNGVLR.G	3.04	No	Yes	0.09	855.42	3	VASGRTNQSIMVQ	1	SDK1_HUMAN Protein sidekick-1
Q7Z5N4	SDK1	1024	1000	R.LTHTLN*STTHEYK#.I	2.44	Yes	No	1.07	778.391	2	RLTHTLNSTTHEY	2	SDK1_HUMAN Protein sidekick-1
Q7Z6M3	MILR1	182	1000	K.YDR@EPAEFN*LTK#.K	3.057	Yes	No	-0.4	750.376	2	REPAEFNLTKKNP	1	MILR1_HUMAN Allergin-1
Q7Z7H5	TMED4	117	1000	R.FTFTSHTPGDHQICLHSN*STR.M	4.191	Yes	Yes	1.32	816.042	3	QICLHSNSTRMAL	4	TMED4_HUMAN Transmembrane emp24 domain-containing protein 4
Q86SJ2	AMIGO2	104	12.218	R.HNN*ITSISTGSFSTTPNLK.C	4.167	Yes	Yes	1.19	1011.51	2	LILRHNNITSIST	6	AMGO2_HUMAN Amphoterin-induced protein 2
Q86SQ4	GPR126	324	59.298	K.ILSN*LSCNVK#.G	2.096	Yes	No	0.14	579.812	2	NAKILSNLSCNVK	2	GP126_HUMAN G-protein coupled receptor 126
Q8IWA5	SLC44A2	187	1000	K.GVLMVGN*ETTYEDGHGSRKN*ITDLVEGAK.K	4.183	Yes	Yes	-0.02	1032.84	3	GVLMVGNETTYED	3	CTL2_HUMAN Choline transporter-like protein 2
Q8IWA5	SLC44A2	200	1000	K.GVLMVGN*ETTYEDGHGSRKN*ITDLVEGAK.K	4.183	Yes	Yes	-0.02	1032.84	3	GHGSRKNITDLVE	5	CTL2_HUMAN Choline transporter-like protein 2
Q8IWA5	SLC44A2	417	84.609	K.TCNPETFPSSN*ESR@.Q	3.75	Yes	Yes	-0.52	817.85	2	ETFPSSNESRQCP	5	CTL2_HUMAN Choline transporter-like protein 2
Q8IWK6	GPR125	433	24.243	R.VLYMFNQMPLN*LTNAVATAR@.Q	4.337	Yes	No	1.38	1138.59	2	FNQMPLNLTNAVA	1	GP125_HUMAN Probable G-protein coupled receptor 125
Q8IZF2	GPR116	256	139.126	K.ANEQVVQSLN*QTYK#.M	4.785	Yes	No	0.68	816.914	2	QVVQSLNQTYKMD	1	GP116_HUMAN Probable G-protein coupled receptor 116
Q8IZF2	GPR116	301	1000	K.EVLSSN*VSWR@.Y	2.072	Yes	No	-1.57	593.307	2	KEVLSSNVSWRYE	1	GP116_HUMAN Probable G-protein coupled receptor 116
Q8IZF2	GPR116	315	1000	R.YEEQQLEIQN*SSR@.F	3.94	Yes	No	-0.38	816.888	2	QQLEIQNSSRFSI	3	GP116_HUMAN Probable G-protein coupled receptor 116
Q8IZF2	GPR116	627	48.874	K.HNFN*ASSVSWCSK#.T	3.725	Yes	No	0.11	767.84	2	CYKHNFNASSVSW	1	GP116_HUMAN Probable G-protein coupled receptor 116
Q8IZF2	GPR116	649	17.009	K.TVDVCCHFTNAAN*NSVWSPSMK#.L	4.741	Yes	No	-3.1	846.037	3	HFTNAANNSVWSP	1	GP116_HUMAN Probable G-protein coupled receptor 116
Q8IZF2	GPR116	666	70.435	K.LNLVPGEN*ITCQDPVIGVGEPGK#.V	4.407	Yes	No	0.27	1209.12	2	NLVPGENITCQDP	4	GP116_HUMAN Probable G-protein coupled receptor 116
Q8N441	FGFRL1	255	1000	R.SK#PVLTGTHPVN*TTVDFGGTTSFQCK#.V	3.243	Yes	No	0.29	700.353	4	TGTHPVNTTVDFG	1	FGRL1_HUMAN Fibroblast growth factor receptor-like 1
Q8N441	FGFRL1	293	1000	K.R@VEYGAEGR@HN*STIDVGGQK#.F	2.786	Yes	No	-0.49	549.784	4	GAEGRHNSTIDVG	2	FGRL1_HUMAN Fibroblast growth factor receptor-like 1
Q8N8Z6	DCBLD1	64	42.565	K.NYPGTYPN*HTVCEK.T	3.102	Yes	Yes	-0.09	841.872	2	YPGTYPNHTVCEK	2	DCBD1_HUMAN Discoidin, CUB and LCCL domain-containing protein 1
Q8N8Z6	DCBLD1	277	1000	R.ASSSWQSVN*ESGDQVHWSPGQAR.L	5.264	Yes	Yes	1.57	1252.06	2	SSWQSVNESGDQV	4	DCBD1_HUMAN Discoidin, CUB and LCCL domain-containing protein 1
Q8NBJ4	GOLM1	109	24.437	K.AVLVNN*ITTGER.L	2.7	Yes	Yes	0.15	645.351	2	KAVLVNNITTGER	3	GOLM1_HUMAN Golgi membrane protein 1
Q8NBJ5	COLGALT1	96	37.54	R.TALWVATDHNMDN*TSTVLR@.E	4.481	Yes	No	0.47	1077.53	2	TDHNMDNTSTVLR	2	GT251_HUMAN Procollagen galactosyltransferase 1
Q8NC42	RNF149	131	99.228	R.RN*ASAVVLYNEER.Y	3.832	No	Yes	-1.98	762.387	2	LVAARRNASAVVL	2	RN149_HUMAN E3 ubiquitin-protein ligase RNF149
Q8NE01	CNNM3	73	1000	R.LFGPGFAN*SSWSWVAPEGAGCR@.E	3.617	Yes	Yes	5.47	1181.56	2	FGPGFANSSWSWV	3	CNNM3_HUMAN Metal transporter CNNM3
Q8NFZ8	CADM4	262	37.54	R.WNR@GN*ESLPER@.A	2.578	Yes	No	0.11	686.848	2	IRWNRGNESLPER	1	CADM4_HUMAN Cell adhesion molecule 4
Q8TBP5	FAM174A	83	23.624	R.GSEGGN*GSNPVAGLETDDHGGK.A	2.941	No	Yes	0.22	686.635	3	RGSEGGNGSNPVA	1	F174A_HUMAN Membrane protein FAM174A
Q8TCJ2	STT3B	616	1000	R.VMSWWDYGYQIAGMAN*R@.T	3.37	Yes	Yes	0.29	1028.97	2	QIAGMANRTTLVD	3	STT3B_HUMAN Dolichyl-diphosphooligosaccharide--protein glycosyltransferase subunit STT3B
Q8TCJ2	STT3B	627	17.009	R.TTLVDNNTWN*NSHIALVGK#.A	2.577	Yes	No	0.73	703.364	3	VDNNTWNNSHIAL	2	STT3B_HUMAN Dolichyl-diphosphooligosaccharide--protein glycosyltransferase subunit STT3B
Q8TCT8	SPPL2A	149	1000	K.DFR@DMN*QTLGDN*ITVK#.M	2.951	Yes	No	0.96	943.961	2	KDFRDMNQTLGDN	4	SPP2A_HUMAN Signal peptide peptidase-like 2A
Q8TCT8	SPPL2A	155	1000	K.DFR@DMN*QTLGDN*ITVK#.M	2.951	Yes	No	0.96	943.961	2	NQTLGDNITVKMY	4	SPP2A_HUMAN Signal peptide peptidase-like 2A
Q8TE58	ADAMTS15	141	1000	R.GAEYVISPLPN*ASAPAAQR@.N	4.253	Yes	No	0.53	961.005	2	VISPLPNASAPAA	2	ATS15_HUMAN A disintegrin and metalloproteinase with thrombospondin motifs 15
Q8TE58	ADAMTS15	591	67.841	K.SFR@EEQCEAFNGYN*HSTNR@.L	5.952	Yes	No	-0.16	787.679	3	EAFNGYNHSTNRL	3	ATS15_HUMAN A disintegrin and metalloproteinase with thrombospondin motifs 15
Q8WTV0	SCARB1	102	27.121	R.HK#SN*ITFNNN*DTVSFLEYR@.T	3.669	Yes	No	-0.81	773.711	3	EFRHKSNITFNNN	1	SCRB1_HUMAN Scavenger receptor class B member 1
Q8WTV0	SCARB1	108	17.009	R.HK#SN*ITFNNN*DTVSFLEYR@.T	3.669	Yes	No	-0.81	773.711	3	NITFNNNDTVSFL	1	SCRB1_HUMAN Scavenger receptor class B member 1
Q8WTX9	ZDHHC1	154	1000	K.HCSACN*KCVCGFDHHCK#.W	1.003	Yes	No	-0.56	729.95	3	KHCSACNKCVCGF	1	ZDHC1_HUMAN Probable palmitoyltransferase ZDHHC1
Q8WVQ1	CANT1	88	53.534	R.LGQAPANWYN*DTYPLSPPQR.T	4.47	No	Yes	0.37	1146.05	2	APANWYNDTYPLS	2	CANT1_HUMAN Soluble calcium-activated nucleotidase 1
Q92508	PIEZO1	2331	1000	K.HMLALAPN*STAR@.R	2.789	Yes	No	-1.41	645.844	2	MLALAPNSTARRQ	1	PIEZ1_HUMAN Piezo-type mechanosensitive ion channel component 1
Q92542	NCSTN	387	1000	R.TSLELWM^HTDPVSQK#N*ESVR@.N	3.188	Yes	Yes	0.7	797.396	3	DPVSQKNESVRNQ	5	NICA_HUMAN Nicastrin
Q92542	NCSTN	417	1000	R.R@PN*QSQPLPPSSLQR@.F	3.921	Yes	Yes	0.27	860.475	2	VILRRPNQSQPLP	8	NICA_HUMAN Nicastrin
Q92542	NCSTN	612	1000	K.DLYEYSWVQGPLHSN*ETDR@.L	4.335	Yes	Yes	1.68	1159.53	2	QGPLHSNETDRLP	5	NICA_HUMAN Nicastrin
Q92729	PTPRU	548	37.327	K.LRN*ETYHVFSNLHPGTTYLFSVR.A	3.21	No	Yes	-0.49	689.352	4	TISKLRNETYHVF	2	PTPRU_HUMAN Receptor-type tyrosine-protein phosphatase U
Q92823	NRCAM	276	45.026	R.ERPPTFLTPEGN*ASNKEELR.G	4.29	No	Yes	1.63	763.386	3	FLTPEGNASNKEE	2	NRCAM_HUMAN Neuronal cell adhesion molecule
Q92823	NRCAM	858	27.055	R.VNVVN*STLAEVHWDPVPLK.S	4.598	No	Yes	1.85	1060.57	2	VRVNVVNSTLAEV	1	NRCAM_HUMAN Neuronal cell adhesion molecule
Q92823	NRCAM	993	1000	K.YQPIN*STHELGPLVDLK.I	2.866	No	Yes	1.63	964.008	2	LKYQPINSTHELG	1	NRCAM_HUMAN Neuronal cell adhesion molecule
Q92854	SEMA4D	379	87.265	R.AAN*YTSSLNLPDK#.T	2.965	Yes	Yes	0.13	702.853	2	SEARAANYTSSLN	3	SEM4D_HUMAN Semaphorin-4D
Q92859	NEO1	73	1000	R.GSSVILN*CSAYSEPSPK.I	2.505	No	Yes	1.18	899.925	2	GSSVILNCSAYSE	1	NEO1_HUMAN Neogenin
Q92859	NEO1	470	1000	R.TPASDPHGDN*LTYSVFYTK.E	3.068	No	Yes	-2.39	705.995	3	SDPHGDNLTYSVF	2	NEO1_HUMAN Neogenin
Q92859	NEO1	639	1000	R.TLSDVPSAAPQN*LSLEVR.N	3.305	No	Yes	0.31	950.499	2	PSAAPQNLSLEVR	1	NEO1_HUMAN Neogenin
Q92878	RAD50	38	1000	K.QIITFFSPLTILVGPN*GAGK#.T	4.811	Yes	No	0.95	1042.59	2	TILVGPNGAGKTT	2	RAD50_HUMAN DNA repair protein RAD50
Q95604	HLA-C	110	1000	R.GYYN*QSEAGSHTIQR@.M	4.486	Yes	Yes	-0.07	860.399	2	KLRGYYNQSEAGS	3	1C17_HUMAN HLA class I histocompatibility antigen, Cw-17 alpha chain
Q969P0	IGSF8	327	1000	R.IGPGEPLELLCN*VSGALPPAGR@.H	4.923	Yes	No	1.02	1113.59	2	PLELLCNVSGALP	1	IGSF8_HUMAN Immunoglobulin superfamily member 8
Q96AP7	ESAM	169	1000	R.LQGVPHVGAN*VTLSCQSPR@.S	4.168	Yes	No	1.63	1015.03	2	VPHVGANVTLSCQ	3	ESAM_HUMAN Endothelial cell-selective adhesion molecule
Q96J84	KIRREL	140	1000	R.IDGGPVILLQAGTPHN*LTCR@.A	4.804	Yes	No	0.36	1071.07	2	QAGTPHNLTCRAF	2	KIRR1_HUMAN Kin of IRRE-like protein 1
Q96J84	KIRREL	297	87.265	K.VGSTN*VSTLVNVHFAPR@.I	3.698	Yes	No	-0.02	903.988	2	NKVGSTNVSTLVN	4	KIRR1_HUMAN Kin of IRRE-like protein 1
Q96PD2	DCBLD2	155	1000	K.YCGLGLQMN*HSIESK#.G	4.564	Yes	No	1.06	874.411	2	GLGLQMNHSIESK	2	DCBD2_HUMAN Discoidin, CUB and LCCL domain-containing protein 2
Q96PD2	DCBLD2	272	0	K.GIPYYESSLANN*VTSVVGHLSTSLFTFK#.T	3.636	Yes	No	2.1	1014.85	3	ESSLANNVTSVVG	1	DCBD2_HUMAN Discoidin, CUB and LCCL domain-containing protein 2
Q96PQ0	SORCS2	328	1000	R.YVTCAIHN*CSEK#.M	3.063	Yes	No	-0.41	746.83	2	VTCAIHNCSEKML	1	SORC2_HUMAN VPS10 domain-containing receptor SorCS2
Q96S52	PIGS	370	1000	K.TYN*ASVLPVR@.V	2.483	Yes	Yes	0.09	564.816	2	VDSKTYNASVLPV	2	PIGS_HUMAN GPI transamidase component PIG-S
Q96T88	UHRF1	791	57.047	R.SYAM^QVNQPLQTVLNQLFPGYGN*GR@.-	4.141	Yes	Yes	-0.09	940.804	3	LFPGYGNGR	3	UHRF1_HUMAN E3 ubiquitin-protein ligase UHRF1
Q99523	SORT1	98	7.71	K.LAN*NTHQHVFDDLR.G	2.29	Yes	Yes	0.08	561.609	3	FVAKLANNTHQHV	3	SORT_HUMAN Sortilin
Q99650	OSMR	446	1000	R.IVSLEPGN*HTVTLFWK#PLSK#.L	2.536	Yes	No	-0.33	762.43	3	VSLEPGNHTVTLF	1	OSMR_HUMAN Oncostatin-M-specific receptor subunit beta
Q99650	OSMR	491	114.239	K.ILFYNVVVENLDK#PSSSELHSIPAPAN*STK#.L	6.325	Yes	No	3.64	1096.92	3	SIPAPANSTKLIL	5	OSMR_HUMAN Oncostatin-M-specific receptor subunit beta
Q9BRK3	MXRA8	306	1000	R.GSPGN*GSSHSGAPGPDPTLAR@.G	2.276	Yes	No	0.75	964.459	2	PRGSPGNGSSHSG	2	MXRA8_HUMAN Matrix-remodeling-associated protein 8
Q9BVK6	TMED9	125	1000	R.FTFTSHTPGEHQICLHSN*STK.F	4.479	Yes	Yes	-1.44	811.377	3	QICLHSNSTKFSL	3	TMED9_HUMAN Transmembrane emp24 domain-containing protein 9
Q9BX74	TM2D1	72	62.715	K.INDATQEPVN*CTN*YTAHVSCFPAPN*ITCK#.D	4.832	Yes	No	1.57	1113.83	3	ATQEPVNCTNYTA	1	TM2D1_HUMAN TM2 domain-containing protein 1
Q9BX74	TM2D1	75	63.419	K.INDATQEPVN*CTN*YTAHVSCFPAPN*ITCK#.D	4.832	Yes	No	1.57	1113.83	3	EPVNCTNYTAHVS	1	TM2D1_HUMAN TM2 domain-containing protein 1
Q9BX74	TM2D1	87	148.406	K.INDATQEPVN*CTN*YTAHVSCFPAPN*ITCK#.D	4.832	Yes	No	1.57	1113.83	3	SCFPAPNITCKDS	1	TM2D1_HUMAN TM2 domain-containing protein 1
Q9BX74	TM2D1	96	41.429	K.DSSGN*ETHFTGNEVGFFK#PISCR@.N	4.904	Yes	Yes	0.39	868.402	3	CKDSSGNETHFTG	3	TM2D1_HUMAN TM2 domain-containing protein 1
Q9BXB1	LGR4	294	21.746	R.TIHLYDNPLSFVGNSAFHN*LSDLHSLVIR@.G	5.005	Yes	No	0.88	822.931	4	GNSAFHNLSDLHS	1	LGR4_HUMAN Leucine-rich repeat-containing G-protein coupled receptor 4
Q9BY67	CADM1	113	1000	K.VSLTN*VSISDEGR.Y	2.808	No	Yes	-0.01	690.349	2	LKVSLTNVSISDE	1	CADM1_HUMAN Cell adhesion molecule 1
Q9BY67	CADM1	302	7.71	R.VDDEMPQHAVLSGPNLFINN*LNK.T	3.255	No	Yes	-4.61	856.756	3	PNLFINNLNKTDN	1	CADM1_HUMAN Cell adhesion molecule 1
Q9BZR6	RTN4R	179	63.076	R.DLGN*LTHLFLHGNR@.I	3.1	Yes	No	0	539.289	3	TFRDLGNLTHLFL	1	RTN4R_HUMAN Reticulon-4 receptor
Q9BZR6	RTN4R	372	1000	R.VPPGDSPPGN*GSGPR.H	2.038	No	Yes	-0.9	697.333	2	GDSPPGNGSGPRH	1	RTN4R_HUMAN Reticulon-4 receptor
Q9C0C4	SEMA4C	106	24.437	K.GKNN*QTECFNFIR.F	3.051	No	Yes	0.76	815.881	2	IQKGKNNQTECFN	1	SEM4C_HUMAN Semaphorin-4C
Q9C0C4	SEMA4C	121	1000	R.FLQPYN*ASHLYVCGTYAFQPK.C	3.125	No	Yes	0.24	836.403	3	RFLQPYNASHLYV	2	SEM4C_HUMAN Semaphorin-4C
Q9C0H2	TTYH3	144	1000	R.VWDTAVGLN*HTAEPSLQTLER@.Q	4.213	Yes	No	-0.1	1173.6	2	DTAVGLNHTAEPS	3	TTYH3_HUMAN Protein tweety homolog 3
Q9H0X4	ITFG3	314	1000	K.SDPHWESMLN*ATTR@.R	2.502	Yes	No	0.32	827.38	2	HWESMLNATTRRM	3	ITFG3_HUMAN Protein ITFG3
Q9H0X4	ITFG3	389	1000	R.YKPDTLAVAVEN*GTGTDR.Q	4.014	Yes	Yes	0.21	955.473	2	LAVAVENGTGTDR	4	ITFG3_HUMAN Protein ITFG3
Q9H2A7	CXCL16	168	160.48	K.ELTRPN*ETTIHTAGHSLAAGPEAGENQK.Q	6.118	No	Yes	0.44	978.148	3	KELTRPNETTIHT	4	CXL16_HUMAN C-X-C motif chemokine 16
Q9H5V8	CDCP1	180	1000	R.IGTFCSN*GTVSR@.I	3.026	Yes	No	0.46	654.316	2	IGTFCSNGTVSRI	2	CDCP1_HUMAN CUB domain-containing protein 1
Q9H5V8	CDCP1	205	1000	R.N*VSGFSIAN*R@.S	1.899	Yes	No	1.15	538.777	2	PWFHPRNVSGFSI	2	CDCP1_HUMAN CUB domain-containing protein 1
Q9H5V8	CDCP1	213	1000	R.N*VSGFSIAN*R@.S	1.899	Yes	No	1.15	538.777	2	SGFSIANRSSIKR	1	CDCP1_HUMAN CUB domain-containing protein 1
Q9H5V8	CDCP1	270	30.835	R.ASVSFLNFN*LSNCER@.K	3.856	Yes	No	-0.32	883.921	2	VSFLNFNLSNCER	3	CDCP1_HUMAN CUB domain-containing protein 1
Q9H5V8	CDCP1	386	1000	R.TCSSN*LTLTSGSK#.H	2.111	Yes	No	0	683.828	2	SRTCSSNLTLTSG	1	CDCP1_HUMAN CUB domain-containing protein 1
Q9H6B4	CLMP	74	9.34	R.HVYNN*LTEEQK#.G	3.312	Yes	No	0.31	693.337	2	SRHVYNNLTEEQK	2	CLMP_HUMAN CXADR-like membrane protein
Q9H7M9	C10orf54	91	1000	R.N*LTFQDLHLHHGGHQAAN*TSHDLAQR@.H	4.033	Yes	No	0.22	733.359	4	ERRPIRNLTFQDL	1	GI24_HUMAN Platelet receptor Gi24
Q9H7M9	C10orf54	108	1000	R.N*LTFQDLHLHHGGHQAAN*TSHDLAQR@.H	4.033	Yes	No	0.22	733.359	4	GGHQAANTSHDLA	1	GI24_HUMAN Platelet receptor Gi24
Q9H813	TMEM206	148	1000	K.HHYEVIPPLTSPGQPGDMN*CTTQR@.I	4.329	Yes	No	-0.76	915.429	3	GQPGDMNCTTQRI	2	TM206_HUMAN Transmembrane protein 206
Q9H813	TMEM206	155	1000	R.IN*YTDPFSN*QTVK#.S	3.413	Yes	No	0.12	770.873	2	CTTQRINYTDPFS	1	TM206_HUMAN Transmembrane protein 206
Q9H813	TMEM206	162	1000	R.IN*YTDPFSN*QTVK#.S	3.413	Yes	No	0.12	770.873	2	YTDPFSNQTVKSA	1	TM206_HUMAN Transmembrane protein 206
Q9H845	ACAD9	216	81.692	K.VWITN*GGLANIFTVFAK#.T	4.129	Yes	Yes	2.06	931.515	2	SKVWITNGGLANI	4	ACAD9_HUMAN Acyl-CoA dehydrogenase family member 9, mitochondrial
Q9H8M5	CNNM2	112	9.34	R.VYGQNINN*ETWSR@.I	3.006	Yes	No	0.17	795.381	2	YGQNINNETWSRI	1	CNNM2_HUMAN Metal transporter CNNM2
Q9HAT2	SIAE	267	49.418	K.HSVLWNAMIHPLCN*MTLK#.G	3.559	Yes	No	-1.1	726.032	3	MIHPLCNMTLKGV	2	SIAE_HUMAN Sialate O-acetylesterase
Q9HCU4	CELSR2	1501	1000	R.FGSVLGN*YSCAAQGTQGGSK.K	2.84	Yes	Yes	0.81	664.639	3	FGSVLGNYSCAAQ	5	CELR2_HUMAN Cadherin EGF LAG seven-pass G-type receptor 2
Q9HCU4	CELSR2	1565	9.34	R.HIDMADFIANN*GTVPGCPAK.K	5.157	No	Yes	2.37	1066	2	ADFIANNGTVPGC	1	CELR2_HUMAN Cadherin EGF LAG seven-pass G-type receptor 2
Q9HD45	TM9SF3	174	1000	R.IVDVN*LTSEGK#.V	2.658	Yes	Yes	0	593.321	2	NRIVDVNLTSEGK	3	TM9S3_HUMAN Transmembrane 9 superfamily member 3
Q9NPR2	SEMA4B	405	1000	R.K#IN*SSLQLPDR@.V	2.591	Yes	No	0.38	644.371	2	ARERKINSSLQLP	1	SEM4B_HUMAN Semaphorin-4B
Q9NQS3	PVRL3	331	32.925	R.LDGQWPDGLLASDNTLHFVHPLTFN*YSGVYICK#.V	3.931	Yes	No	-1.01	947.964	4	VHPLTFNYSGVYI	1	PVRL3_HUMAN Poliovirus receptor-related protein 3
Q9NR12	PDLIM7	276	24.437	R.TSIVQAAAGGVPGGGSNN*GK#.T	3.648	Yes	No	1.44	876.948	2	PGGGSNNGKTPVC	2	PDLI7_HUMAN PDZ and LIM domain protein 7
Q9NTK5	OLA1	102	24.222	K.GAHN*GQGLGNAFLSHISACDGIFHLTR@.A	4.998	Yes	No	-0.15	715.604	4	LVKGAHNGQGLGN	1	OLA1_HUMAN Obg-like ATPase 1
Q9NV96	TMEM30A	294	59.298	R.YSLN*VTYNYPVHYFDGR.K	4.475	Yes	Yes	-0.34	1055.99	2	AGRYSLNVTYNYP	6	CC50A_HUMAN Cell cycle control protein 50A
Q9NWD8	TMEM248	80	1000	K.HLTN*DTTTPESTMTSGQAR.A	3.502	No	Yes	2.4	1025.97	2	TLKHLTNDTTTPE	1	TM248_HUMAN Transmembrane protein 248
Q9NWD8	TMEM248	132	1000	R.N*VTHLYSTILGHQIGLSGR@.E	3.341	Yes	No	-1.36	692.378	3	FGGYSRNVTHLYS	2	TM248_HUMAN Transmembrane protein 248
Q9NX62	IMPAD1	259	1000	K.QVALQTFGN*QTTIIPAGGAGYK.V	4.036	No	Yes	0.46	1119.59	2	ALQTFGNQTTIIP	1	IMPA3_HUMAN Inositol monophosphatase 3
Q9NY35	CLDND1	42	65.44	R.SPVQEN*SSDLNK.S	2.89	Yes	Yes	0.5	660.812	2	RSPVQENSSDLNK	3	CLDN1_HUMAN Claudin domain-containing protein 1
Q9NZQ7	CD274	200	48.315	R.IN*TTTNEIFYCTFR@.R	2.833	Yes	No	-0.28	894.926	2	TSTLRINTTTNEI	2	PD1L1_HUMAN Programmed cell death 1 ligand 1
Q9NZQ7	CD274	219	179.741	R.R@LDPEEN*HTAELVIPELPLAHPPNER@.T	4.286	Yes	No	-0.04	751.147	4	RLDPEENHTAELV	4	PD1L1_HUMAN Programmed cell death 1 ligand 1
Q9NZU0	FLRT3	226	73.311	K.VFFNLVN*LTELSLVR.N	4.552	No	Yes	1.12	884.001	2	VFFNLVNLTELSL	1	FLRT3_HUMAN Leucine-rich repeat transmembrane protein FLRT3
Q9P0K1	ADAM22	519	64.398	R.ETCSGN*SSQCAPNIHK#.M	3.516	Yes	No	1.91	900.886	2	RETCSGNSSQCAP	1	ADA22_HUMAN Disintegrin and metalloproteinase domain-containing protein 22
Q9P273	TENM3	380	30.835	K.LGGFTQEN*NTIDSGELDIGR@R@.A	2.695	Yes	No	-0.57	769.721	3	GGFTQENNTIDSG	1	TEN3_HUMAN Teneurin-3
Q9P2B2	PTGFRN	300	1000	K.ELDLTCN*ITTDR.A	2.067	No	Yes	0.23	727.34	2	ELDLTCNITTDRA	1	FPRP_HUMAN Prostaglandin F2 receptor negative regulator
Q9P2B2	PTGFRN	383	84.892	K.ENSGYYYCHVSLWAPGHN*R.S	2.736	No	Yes	-1.1	771.672	3	LWAPGHNRSWHKV	2	FPRP_HUMAN Prostaglandin F2 receptor negative regulator
Q9P2B2	PTGFRN	600	1000	R.YSVLIMAEKPVGDLSSPN*ETK.Y	3.011	No	Yes	0.07	761.056	3	GDLSSPNETKYII	3	FPRP_HUMAN Prostaglandin F2 receptor negative regulator
Q9UBG0	MRC2	69	1000	R.VTPACN*TSLPAQR@.W	2.974	Yes	No	1.8	712.364	2	RVTPACNTSLPAQ	1	MRC2_HUMAN C-type mannose receptor 2
Q9UBG0	MRC2	140	1000	R.TSN*ISKPGTLER.G	2.274	Yes	Yes	0.84	653.349	2	LGARTSNISKPGT	2	MRC2_HUMAN C-type mannose receptor 2
Q9UBG0	MRC2	497	65.44	R.WNDSPCN*QSLPSICK#.K	4.902	Yes	No	-0.51	908.902	2	WNDSPCNQSLPSI	2	MRC2_HUMAN C-type mannose receptor 2
Q9UHG3	PCYOX1	323	45.026	K.M^SN*ITFLNFDPPIEEFHQYYQHIVTTLVK.G	3.759	No	Yes	-1.26	1181.92	3	LNRKMSNITFLNF	1	PCYOX_HUMAN Prenylcysteine oxidase 1
Q9UIW2	PLXNA1	77	1000	K.LSGN*LTLLR@.A	2.099	Yes	No	-0.07	498.307	2	IYKLSGNLTLLRA	2	PLXA1_HUMAN Plexin-A1
Q9UIW2	PLXNA1	701	1000	R.VN*VSEDCPQILPSTQIYVPVGVVK#PITLAAR@.N	3.885	Yes	No	0.22	1127.62	3	FLEGRVNVSEDCP	4	PLXA1_HUMAN Plexin-A1
Q9UIW2	PLXNA1	1043	1000	K.YN*YTEDPTILR@.I	1.97	Yes	No	-1.79	697.344	2	NPEVKYNYTEDPT	4	PLXA1_HUMAN Plexin-A1
Q9UJ14	GGT7	267	1000	R.LPWSQVLAFAAAVAQDGFN*VTHDLAR.A	4.928	No	Yes	0.31	934.149	3	VAQDGFNVTHDLA	1	GGT7_HUMAN Gamma-glutamyltransferase 7
Q9ULF5	SLC39A10	218	16.198	R.GEPSNEPSTETN*K#TQEQSDVK#.L	2.222	Yes	No	-0.02	775.358	3	EPSTETNKTQEQS	1	S39AA_HUMAN Zinc transporter ZIP10
Q9ULF5	SLC39A10	339	48.998	K.DLNEDDHHHECLN*VTQLLK#.Y	3.387	Yes	No	-0.16	781.033	3	HHHECLNVTQLLK	4	S39AA_HUMAN Zinc transporter ZIP10
Q9ULI3	HEG1	314	12.218	K.LNN*STGLQSSSVSQTK#.T	3.203	Yes	No	3.85	831.423	2	STEKLNNSTGLQS	1	HEG1_HUMAN Protein HEG homolog 1
Q9ULI3	HEG1	520	1000	R.SYSESSSTSSSESLN*SSAPR@.G	3.706	Yes	No	2.68	1029.95	2	SSSESLNSSAPRG	1	HEG1_HUMAN Protein HEG homolog 1
Q9ULI3	HEG1	1080	1000	R.TFLN*TTVEK#.H	1.829	Yes	No	0.49	532.286	2	LKRTFLNTTVEKH	1	HEG1_HUMAN Protein HEG homolog 1
Q9UMS4	PRPF19	403	39.016	R.TNVANFPGHSGPITSIAFSEN*GYYLATAADDSSVK.L	5.09	No	Yes	-1.01	1202.24	3	SIAFSENGYYLAT	1	PRP19_HUMAN Pre-mRNA-processing factor 19
Q9UN70	PCDHGC3	245	65.44	K.VLDANDNAPVFN*QSLYR@.A	4.648	Yes	Yes	1.82	972.988	2	DNAPVFNQSLYRA	3	PCDGK_HUMAN Protocadherin gamma-C3
Q9UN70	PCDHGC3	424	1000	K.TSADLDR@ETVPEYN*LSITAR@.D	2.719	Yes	No	0.33	756.055	3	ETVPEYNLSITAR	1	PCDGK_HUMAN Protocadherin gamma-C3
Q9UN71	PCDHGB4	543	1000	R.DQGSPALSAN*VSLR.V	2.565	Yes	Yes	-0.36	709.362	2	SPALSANVSLRVL	2	PCDGG_HUMAN Protocadherin gamma-B4
Q9UN76	SLC6A14	174	100.207	R.SPIVTHCN*VSTVNK.G	3.879	No	Yes	0.18	779.893	2	PIVTHCNVSTVNK	1	S6A14_HUMAN Sodium- and chloride-dependent neutral and basic amino acid transporter B(0+)
Q9UN76	SLC6A14	189	1000	K.GIQEIIQMN*K.S	2.03	No	Yes	0.12	588.813	2	QEIIQMNKSWVDI	2	S6A14_HUMAN Sodium- and chloride-dependent neutral and basic amino acid transporter B(0+)
Q9Y4D7	PLXND1	155	1000	R.R@GN*ISAVAVR@.F	2.692	Yes	Yes	0.35	529.324	2	QLRRRGNISAVAV	2	PLXD1_HUMAN Plexin-D1
Q9Y4D7	PLXND1	500	48.874	K.INLN*ESMQVVSR@.R	3.238	Yes	Yes	0.74	699.866	2	LLKINLNESMQVV	4	PLXD1_HUMAN Plexin-D1
Q9Y4D7	PLXND1	583	1000	R.CTLQQDCTN*SSQQHFWTSASEGPSR@.C	3.393	Yes	Yes	-1.38	974.417	3	LQQDCTNSSQQHF	7	PLXD1_HUMAN Plexin-D1
Q9Y5G0	PCDHGB5	415	1000	K.LVTDGTLDREQTPEYN*VTITATDR.G	4.296	No	Yes	1.42	904.448	3	EQTPEYNVTITAT	2	PCDGH_HUMAN Protocadherin gamma-B5
Q9Y5L3	ENTPD2	294	14.966	R.GFSTQVLLGDVYQSPCTM^AQRPQNFN*SSAR.V	3.197	No	Yes	0.66	1126.86	3	QRPQNFNSSARVS	3	ENTP2_HUMAN Ectonucleoside triphosphate diphosphohydrolase 2
Q9Y5Y6	ST14	772	57.711	R.VIN*QTTCENLLPQQITPR.M	4.376	No	Yes	1.69	1064.55	2	GEIRVINQTTCEN	3	ST14_HUMAN Suppressor of tumorigenicity 14 protein
Q9Y639	NPTN	197	42.098	K.N*ASNMEYR.I	1.976	Yes	Yes	0.18	494.208	2	LSATRKNASNMEY	3	NPTN_HUMAN Neuroplastin
Q9Y639	NPTN	229	1000	K.AN*ATIEVK#.A	2.667	Yes	No	0.43	428.741	2	VSAPKANATIEVK	1	NPTN_HUMAN Neuroplastin
Q9Y639	NPTN	284	100.017	R.K#K#ENGMPMDIVN*TSGR@.F	3.641	Yes	Yes	0.17	601.308	3	MPMDIVNTSGRFF	7	NPTN_HUMAN Neuroplastin
Q9Y653	GPR56	324	1000	K.VAN*LTEPVVLTFQHQLQPK#.N	3.918	Yes	No	1.58	1087.11	2	QNTKVANLTEPVV	1	GPR56_HUMAN G-protein coupled receptor 56
Q9Y6M7	SLC4A7	786	84.359	K.KDN*ITAHNISWR.N	3.475	Yes	Yes	0.02	486.584	3	AQWKKDNITAHNI	2	S4A7_HUMAN Sodium bicarbonate cotransporter 3

## Sheet: description
Column Heading	Description
UniProt name	UniProt symbol of the protein
Gene symbol	Gene symbol for the assigned N-sialoglycoprotein
Site	The N-sialoglycosylation site
ModScore	Score matching the indicated N-sialoglycosylation site
Sequence	Sequence of the N-sialoglycopeptide obtained by ModScore, *-N-sialoglycosylation site; ^-methionine oxidation; @-heavy isotope labled arginine; #-heavy isotope labled lysine
XCorr	SEQUEST XCorr
MDA-MB-231	Peptide identified in the SILAC experiment in MDA-MB-231 cells
MCF-7	Peptide identified in the SILAC experiment in MCF-7 cells
ppm	Mass accuracy of the peptide
Obs m/z	Observed mass-to-charge ratio of the indicated peptide
z	Charge state of the peptide
Local sequence	Local sequence of the glycosylation site
Count	Number of times the sialoglycopeptide was identified
Annotation	Description of the protein function
