# Supplementary material for: Systematic and site-specific analysis of N-sialoglycosylated proteins on the cell surface by integrating click chemistry and MS-based proteomics
Source: Royal Society of Chemistry journal article supplement (doi:10.1039/c5sc01124h), 2015-01-01
Supplement: c5sc01124h10.xlsx [file c5sc01124h10.xlsx]

## Sheet: Breast_SILAC
Table S5. N-sialoglycoproteins belonging to type I, II single-pass, multi-pass and peripheral membrane protein (UniProt)
Peripheral	Type I	Type II	Muti
CLU	ACVR1	AGRN	ABCA1
GBA	ADAM10	ATP1B1	ANO6
LRP1	ADAM17	ATP1B3	CD151
MSN	ADAM22	BST2	CD47
	ADAM8	CANT1	CD63
	ALCAM	CD74	CD82
	AMIGO2	ECE1	CD97
	ATRN	ENPP1	CELSR2
	AXL	FUT10	CLDND1
	BCAM	GGT1	CNNM2
	BMPR2	GGT7	CNNM3
	BSG	GOLIM4	EMP3
	BTN2A1	GOLM1	ENTPD2
	BTN3A3	HS2ST1	F2R
	C10orf54	IMPAD1	GPR107
	CACNA2D1	ITFG3	GPR116
	CADM1	NCEH1	GPR125
	CADM4	SLC3A2	GPR126
	CD274	ST14	GPR39
	CD276	TFRC	GPR56
	CD40		LGR4
	CD44		PIEZO1
	CD46		PIGS
	CD55		PPAP2B
	CLMP		PPAP2C
	CPD		SCARB1
	CSF1		SCARB2
	CSPG4		SLC16A3
	CXADR		SLC1A4
	CXCL16		SLC1A5
	DAG1		SLC22A5
	DCBLD1		SLC2A1
	DCBLD2		SLC39A10
	DSG2		SLC39A6
	EFNB1		SLC44A2
	EGFR		SLC4A7
	EPHA2		SLC6A14
	EPHB2		SLC7A1
	EPHB3		SPPL2A
	EPHB4		STT3A
	ERBB2		STT3B
	ERBB3		SYPL1
	ESAM		TM2D1
	F3		TM9SF3
	FAM171A1		TMEM206
	FAM174A		TMEM248
	FAT1		TMEM26
	FAT4		TMEM30A
	FCGRT		TMEM30B
	FGFRL1		TTYH3
	FLRT3		ZDHHC1
	FREM2
	HEG1
	HLA-A
	HLA-B
	HLA-C
	HLA-DRA
	ICAM1
	ICAM2
	ICOSLG
	IFNAR1
	IGF1R
	IGF2R
	IGSF3
	IL6ST
	INSR
	ITGA1
	ITGA2
	ITGA3
	ITGA5
	ITGA6
	ITGAV
	ITGB1
	ITGB4
	ITGB5
	KIAA1324
	KIRREL
	L1CAM
	LAMP1
	LAMP2
	LDLR
	LMAN2
	LRP1
	LRP10
	LRP5
	LTBR
	LY75
	M6PR
	MCAM
	MET
	MICA
	MICB
	MILR1
	MMP15
	MPZL1
	MRC2
	MXRA8
	NCAM2
	NCSTN
	NEO1
	NOTCH2
	NPTN
	NRCAM
	NRP1
	NRP2
	OSMR
	PCDH1
	PCDHGB4
	PCDHGB5
	PCDHGC3
	PLXDC2
	PLXNA1
	PLXNA3
	PLXNB2
	PODXL
	PTGFRN
	PTK7
	PTPRF
	PTPRG
	PTPRJ
	PTPRM
	PTPRS
	PTPRU
	PVR
	PVRL1
	RAET1G
	ROR1
	SEMA4B
	SEMA4C
	SEMA4D
	SEZ6L2
	SORCS2
	SORT1
	TACSTD2
	THBD
	TMED4
	TMED9
	TMEM132A
	TPBG
	VASN

## Sheet: description
Column Heading	Description
Peripheral	Protein is classified to peripheral membrane protein in the UniProt database
Type I	Protein is classified to type II single pass membrane protein in the UniProt database
Type II	Protein is classified to type I single pass membrane protein in the UniProt database
Muti	Protein is classified to multi pass membrane protein in the UniProt database
