# Supplementary material for: Systematic and site-specific analysis of N-sialoglycosylated proteins on the cell surface by integrating click chemistry and MS-based proteomics
Source: Royal Society of Chemistry journal article supplement (doi:10.1039/c5sc01124h), 2015-01-01
Supplement: c5sc01124h11.xlsx [file c5sc01124h11.xlsx]

## Sheet: SILAC_Surface
Table S6. Computational results of signal peptide, transmembrane domain and non-classic secretion pathway analysis
UniProt name	Gene symbol	TM	SP	Non-classic	Prediction
D6RDV5	EFNA5	1	Y		n7-15c20/21o183-200i
O00461	GOLIM4	1	0		i12-34o
O00468	AGRN	0	Y		n13-24c29/30o
O00478	BTN3A3	1	Y		n6-24c29/30o248-271i
O00592	PODXL	1	Y		n3-14c22/23o458-481i
O00754	MAN2B1	0	Y		n35-45c49/50o
O14495	PPAP2B	5	0		i34-54o85-106i195-213o225-243i255-275o
O14672	ADAM10	1	Y		n2-13c18/19o676-696i
O14786	NRP1	1	Y		n5-16c21/22o857-882i
O15031	PLXNB2	1	Y		n3-14c18/19o1200-1221i
O15230	LAMA5	0	Y		n20-30c35/36o
O15394	NCAM2	1	Y		n3-14c19/20o695-718i
O15427	SLC16A3	12	0		i20-38o61-82i89-107o113-130i151-170o176-197i228-251o263-281i293-312o318-340i352-371o383-409i
O43194	GPR39	7	0		o28-51i72-92o112-131i152-174o224-246i283-301o321-343i
O43688	PPAP2C	6	0		i7-32o52-78i90-109o162-182i194-213o225-247i
O60449	LY75	1	Y		n12-22c31/32o1667-1691i
O60462	NRP2	1	Y		n4-15c22/23o865-890i
O75054	IGSF3	1	Y		n3-14c19/20o1124-1147i
O75144	ICOSLG	1	Y		n3-13c18/19o254-277i
O75197	LRP5	1	Y		n12-23c31/32o1386-1407i
O75326	SEMA7A	1	Y		n33-40c44/45o640-665i
O75882	ATRN	2	0		i61-78o1279-1303i
O75976	CPD	1	Y		n16-26c31/32o1300-1323i
O76082	SLC22A5	12	0		i20-44o140-159i171-189o195-217i229-253o259-277i338-360o372-394i401-419o425-449i461-483o489-509i
O95084	PRSS23	0	Y		n7-18c23/24o
O95297	MPZL1	1	Y		n20-31c37/38o165-191i
O95477	ABCA1	14	0		i25-46o640-660i680-704o716-736i743-763o775-797i818-842o1347-1368i1655-1677o1697-1723i1735-1754o1766-1790i1802-1820o1853-1875i
P00533	EGFR	1	Y		n8-19c24/25o646-667i
P01033	TIMP1	0	Y		n7-18c23/24o
P01130	LDLR	1	Y		n11-19c24/25o789-810i
P01889	HLA-B	1	Y		n8-19c24/25o308-330i
P01892	HLA-A	1	Y		n8-19c24/25o308-332i
P01903	HLA-DRA	1	Y		n6-17c25/26o221-242i
P02786	TFRC	1	0		i66-88o
P04040	CAT	0	0		i
P04062	GBA	0	Y		n20-31c39/40o
P04156	PRNP	2	Y		n4-14c22/23o112-131i232-252o
P04233	CD74	1	0		i48-72o
P04626	ERBB2	1	Y		n3-16c21/22o654-675i
P05026	ATP1B1	1	0		o36-61i
P05362	ICAM1	1	Y		n9-20c27/28o481-503i
P05556	ITGB1	1	Y		n6-16c20/21o729-751i
P06213	INSR	1	Y		n8-23c27/28o958-979i
P06731	CEACAM5	1	Y		n18-28c34/35o682-701i
P06733	ENO1	0	0	Y/0.536	i
P06756	ITGAV	1	Y		n15-25c30/31o994-1016i
P07204	THBD	1	Y		n4-15c23/24o517-539i
P07686	HEXB	0	Y		n14-24c42/43o
P07737	PFN1	0	0		i
P07996	THBS1	0	Y		n3-13c18/19o
P08069	IGF1R	1	Y		n13-25c30/31o933-958i
P08174	CD55	0	Y		n21-29c34/35o
P08195	SLC3A2	1	0		i183-205o
P08581	MET	1	Y		n5-16c21/22o931-955i
P08648	ITGA5	1	Y		n25-33c41/42o999-1021i
P08962	CD63	4	0		i12-39o51-73i80-107o203-228i
P09603	CSF1	1	Y		n16-27c32/33o497-518i
P09758	TACSTD2	1	Y		n14-25c30/31o273-298i
P10586	PTPRF	1	Y		n14-24c29/30o1261-1284i
P10909	CLU	0	Y		n4-15c22/23o
P11047	LAMC1	0	Y		n17-28c35/36o
P11142	HSPA8	0	0		i
P11166	SLC2A1	12	0		i12-28o64-87i99-116o122-144i156-174o186-207i272-295o307-328i335-357o363-381i402-425o431-450i
P11279	LAMP1	1	Y		n11-22c28/29o382-405i
P11717	IGF2R	1	Y		n23-34c42/43o2305-2327i
P13473	LAMP2	1	Y		n13-24c28/29o375-398i
P13598	ICAM2	1	Y		n8-19c23/24o224-248i
P13726	F3	1	0		o252-274i
P13987	CD59	0	Y		n8-20c25/26o
P15151	PVR	1	Y		n6-19c27/28o344-367i
P15328	FOLR1	1	Y		n9-19c24/25o239-256i
P15514	AREG	1	Y		n5-18c26/27o199-221i
P15529	CD46	1	Y		n18-29c34/35o344-366i
P15586	GNS	0	Y		n25-35c39/40o
P16070	CD44	1	Y		n4-15c20/21o650-671i
P16144	ITGB4	1	Y		n12-22c27/28o711-733i
P17181	IFNAR1	1	Y		n3-14c23/24o437-457i
P17301	ITGA2	1	Y		n6-17c22/23o1134-1158i
P18084	ITGB5	1	Y		n8-19c24/25o720-742i
P19440	GGT1	0	Y		n5-24c29/30o
P20645	M6PR	1	Y		n10-21c26/27o186-210i
P21589	NT5E	1	Y		n10-21c26/27o555-573i
P21860	ERBB3	1	Y		n6-14c19/20o642-666i
P21980	TGM2	0	0	Y/0.577	i
P22314	UBA1	1	0		o890-910i
P22413	ENPP1	1	0		i77-97o
P23229	ITGA6	1	Y		n7-18c23/24o1052-1076i
P23470	PTPRG	2	0		i7-25o737-762i
P25116	F2R	7	Y		n6-16c21/22o108-129i138-157o177-198i219-239o267-291i312-338o350-374i
P25942	CD40	1	Y		n4-15c20/21o194-215i
P26006	ITGA3	1	Y		n16-27c32/33o992-1014i
P26038	MSN	0	0	Y/0.53	i
P27701	CD82	4	0		i12-36o56-78i85-108o228-253i
P28827	PTPRM	1	Y		n4-16c20/21o743-764i
P29317	EPHA2	1	Y		n8-19c26/27o535-558i
P29323	EPHB2	1	Y		n6-13c17/18o543-565i
P30530	AXL	1	Y		n13-24c32/33o450-472i
P30825	SLC7A1	14	0		i37-58o64-85i97-123o166-183i192-210o250-273i285-315o335-356i386-405o411-430i494-518o524-548i560-579o585-606i
P32004	L1CAM	1	Y		n3-14c19/20o1121-1143i
P35052	GPC1	1	Y		n7-18c23/24o540-557i
P35613	BSG	1	Y		n3-14c21/22o324-345i
P36941	LTBR	1	Y		n12-25c30/31o225-248i
P37235	HPCAL1	0	0	Y/0.725	i
P40189	IL6ST	1	Y		n6-17c22/23o621-641i
P40199	CEACAM6	1	0		o324-343i
P42892	ECE1	1	0		i69-91o
P43007	SLC1A4	9	0		o43-65i86-105o117-139i220-237o257-277i297-320o326-349i369-394o406-435i
P43121	MCAM	1	Y		n6-18c23/24o560-583i
P46977	STT3A	13	0		i20-41o83-103i115-135o141-158i170-187o199-225i237-256o268-286i298-319o360-379i386-404o410-430i451-473o
P48509	CD151	4	0		i21-43o55-80i92-115o222-245i
P48960	CD97	7	Y		n5-15c20/21o553-572i584-601o621-642i654-674o694-716i737-760o766-789i
P50895	BCAM	1	Y		n16-26c31/32o549-571i
P50990	CCT8	0	0	Y/0.508	i
P51511	MMP15	1	Y		n29-40c45/46o626-647i
P51805	PLXNA3	1	Y		n4-14c19/20o1220-1242i
P52798	EFNA4	1	Y		n3-14c22/23o180-198i
P54289	CACNA2D1	1	Y		n3-14c18/19o1081-1099i
P54709	ATP1B3	1	0		i38-62o
P54753	EPHB3	1	Y		n16-31c37/38o559-582i
P54760	EPHB4	1	Y		n5-16c21/22o538-563i
P54803	GALC	0	Y		n27-37c42/43o
P54852	EMP3	3	Y		n3-21c26/27o65-89i96-120o140-159i
P55899	FCGRT	1	Y		n10-18c23/24o298-321i
P56159	GFRA1	1	Y		n2-13c18/19o443-461i
P56199	ITGA1	1	Y		n11-23c28/29o1142-1169i
P62841	RPS15	0	0	Y/0.772	i
P62937	PPIA	0	0		i
P78310	CXADR	1	Y		n3-14c19/20o236-260i
P78325	ADAM8	1	Y		n3-14c20/21o654-678i
P78536	ADAM17	1	Y		n5-16c21/22o672-694i
P98172	EFNB1	1	Y		n13-24c29/30o238-263i
Q01973	ROR1	2	Y		n13-24c29/30o404-427i675-694o
Q02878	RPL6	0	0		i
Q03405	PLAUR	0	Y		n6-17c22/23o
Q04721	NOTCH2	1	Y		n7-18c25/26o1678-1700i
Q04771	ACVR1	1	Y		n5-16c20/21o124-146i
Q07954	LRP1	1	Y		n6-16c20/21o4424-4444i
Q08174	PCDH1	1	Y		n37-50c57/58o853-874i
Q08380	LGALS3BP	0	Y		n6-13c18/19o
Q08722	CD47	5	Y		n4-15c20/21o143-165i177-198o210-228i237-264o270-289i
Q10589	BST2	1	0		i22-44o
Q12907	LMAN2	1	0		o323-345i
Q12913	PTPRJ	1	Y		n19-30c35/36o975-996i
Q13200	PSMD2	1	0		o787-806i
Q13308	PTK7	1	Y		n14-25c30/31o705-726i
Q13332	PTPRS	1	Y		n12-24c29/30o1283-1306i
Q13421	MSLN	0	Y		n9-28c38/39o
Q13433	SLC39A6	6	Y		n5-15c20/21o323-349i356-378o425-444i658-679o685-703i724-745o
Q13641	TPBG	1	Y		n21-31c49/50o356-376i
Q13740	ALCAM	1	Y		n11-22c27/28o528-550i
Q13873	BMPR2	1	Y		n11-21c26/27o151-172i
Q14108	SCARB2	1	Y		n4-18c26/27o438-458i
Q14118	DAG1	1	Y		n4-22c27/28o749-775i
Q14126	DSG2	1	Y		n8-18c23/24o607-633i
Q14517	FAT1	1	Y		n5-15c19/20o4182-4202i
Q14997	PSME4	0	0		i
Q15223	PVRL1	1	Y		n14-25c30/31o355-378i
Q15758	SLC1A5	9	0		i53-79o99-119i131-153o228-245i266-290o302-328i335-357o377-402i414-443o
Q16563	SYPL1	3	0		o117-139i151-172o211-233i
Q24JP5	TMEM132A	1	Y		n18-29c33/34o848-873i
Q29980	MICB	1	Y		n6-17c22/23o310-328i
Q29983	MICA	1	Y		n3-14c22/23o310-328i
Q3MIR4	TMEM30B	2	0		o34-55i316-342o
Q4KMG0	CDON	1	Y		n8-20c25/26o964-989i
Q4KMQ2	ANO6	8	0		i298-325o376-396i459-486o506-527i554-572o670-693i727-747o825-846i
Q5SZK8	FREM2	1	Y		n30-41c46/47o3108-3134i
Q5VUB5	FAM171A1	1	Y		n4-14c18/19o304-327i
Q5VW38	GPR107	7	0		o265-284i296-319o331-357i369-387o403-423i497-519o525-544i
Q5VY80	RAET1L	1	Y		n2-20c25/26o224-243i
Q5ZPR3	CD276	1	Y		n14-25c30/31o466-489i
Q6DU44	HLA-E	1	Y		n5-16c21/22o305-329i
Q6EMK4	VASN	1	Y		n7-18c23/24o577-599i
Q6H3X3	RAET1G	1	Y		n8-19c28/29o224-242i
Q6P4F1	FUT10	0	Y		n9-24c32/33o
Q6PIU2	NCEH1	0	Y		n4-11c15/16o
Q6UVK1	CSPG4	1	Y		n13-24c29/30o2225-2246i
Q6UX71	PLXDC2	1	Y		n9-20c28/29o456-478i
Q6UXD5	SEZ6L2	1	Y		n14-22c27/28o845-867i
Q6UXG2	KIAA1324	1	0		o907-931i
Q6V0I7	FAT4	1	0		o4502-4526i
Q6YHK3	CD109	0	Y		n6-16c21/22o
Q6ZUK4	TMEM26	7	Y		n3-18c26/27o36-52i64-83o143-163i206-224o244-263i270-291o297-315i
Q7KYR7	BTN2A1	1	Y		n13-23c28/29o249-269i
Q7LGA3	HS2ST1	0	Y		n12-22c27/28o
Q7Z4F1	LRP10	1	Y		n2-11c16/17o441-462i
Q7Z570	ZNF804A	0	0		i
Q7Z5N4	SDK1	1	0		o2008-2031i
Q7Z6M3	MILR1	1	Y		n8-19c24/25o228-249i
Q7Z7H5	TMED4	1	Y		n16-24c29/30o195-214i
Q86SJ2	AMIGO2	1	0		o399-419i
Q86SQ4	GPR126	7	Y		n20-31c37/38o866-889i901-922o928-950i970-991o1019-1049i1070-1089o1095-1116i
Q8IWA5	SLC44A2	10	0		i34-55o232-252i259-277o315-336i356-379o452-479i500-522o562-585i597-621o637-657i
Q8IWK6	GPR125	7	Y		n15-28c36/37o762-783i795-816o828-851i877-897o917-940i996-1019o1025-1044i
Q8IZF2	GPR116	7	Y		n8-16c21/22o1007-1033i1054-1075o1095-1117i1129-1151o1171-1194i1214-1234o1246-1271i
Q8N441	FGFRL1	1	Y		n6-19c24/25o375-398i
Q8N8Z6	DCBLD1	1	Y		n19-30c34/35o459-480i
Q8NBJ4	GOLM1	0	Y		n16-27c39/40o
Q8NBJ5	COLGALT1	0	Y		n15-26c36/37o
Q8NC42	RNF149	1	Y		n15-27c32/33o201-224i
Q8NE01	CNNM3	3	Y		n2-20c27/28o194-214i221-243o255-277i
Q8NFZ8	CADM4	1	Y		n11-19c24/25o323-347i
Q8TBP5	FAM174A	1	Y		n6-21c39/40o124-144i
Q8TCJ2	STT3B	13	0		i71-93o137-157i169-189o195-213i234-257o263-283i290-310o322-340i352-373o411-433i440-458o464-484i538-558o
Q8TCT8	SPPL2A	9	Y		n10-20c25/26o170-189i215-240o246-268i289-306o312-329i341-361o392-422i434-458o464-481i
Q8TE58	ADAMTS15	0	Y		n2-13c18/19o
Q8WTV0	SCARB1	1	Y		n10-21c25/26o443-464i
Q8WTX9	ZDHHC1	4	0		i53-75o81-103i178-202o242-271i
Q8WVQ1	CANT1	1	0		i43-59o
Q92508	PIEZO1	39	0		o12-41i62-84o126-143i190-211o217-236i248-269o310-329i412-432o438-455i462-484o509-530i579-596o602-621i628-647o680-701i805-824o830-847i854-872o928-946i985-1007o1013-1029i1041-1063o1162-1180i1187-1206o1218-1240i1247-1264o1284-1302i1678-1697o1703-1722i1729-1747o1787-1806i1960-1983o2003-2022i2031-2052o2064-2081i2101-2121o2133-2152i2173-2197o2432-2455i
Q92542	NCSTN	1	Y		n17-28c33/34o670-690i
Q92729	PTPRU	1	Y		n6-17c24/25o745-770i
Q92823	NRCAM	1	Y		n17-24c29/30o1169-1190i
Q92854	SEMA4D	1	Y		n10-18c23/24o735-756i
Q92859	NEO1	1	Y		n10-25c33/34o1104-1128i
Q92878	RAD50	0	0		i
Q95604	HLA-C	1	Y		n8-20c24/25o316-338i
Q969P0	IGSF8	1	Y		n8-19c27/28o580-607i
Q96AP7	ESAM	1	Y		n12-23c29/30o246-271i
Q96J84	KIRREL	1	Y		n2-11c16/17o495-521i
Q96PD2	DCBLD2	3	Y		n20-30c35/36o45-61i165-187o527-552i
Q96PQ0	SORCS2	1	Y		n36-46c51/52o1079-1100i
Q96S52	PIGS	2	0		i19-36o519-542i
Q96T88	UHRF1	0	0		i
Q99523	SORT1	1	Y		n17-27c33/34o757-778i
Q99650	OSMR	1	Y		n3-18c27/28o740-761i
Q9BRK3	MXRA8	1	Y		n12-22c40/41o342-363i
Q9BVK6	TMED9	2	0		i21-42o203-222i
Q9BX74	TM2D1	2	0		i119-136o148-168i
Q9BXB1	LGR4	7	Y		n5-16c24/25o539-564i576-600o620-641i662-683o703-728i749-772o784-804i
Q9BY67	CADM1	1	Y		n4-14c19/20o375-395i
Q9BZR6	RTN4R	0	Y		n11-21c29/30o
Q9C0C4	SEMA4C	1	Y		n5-15c20/21o664-686i
Q9C0H2	TTYH3	5	0		o42-64i85-107o210-231i238-257o388-409i
Q9H0X4	ITFG3	1	0		i49-70o
Q9H2A7	CXCL16	1	Y		n11-21c29/30o204-227i
Q9H5V8	CDCP1	1	Y		n6-17c29/30o666-691i
Q9H6B4	CLMP	1	Y		n3-14c18/19o231-256i
Q9H7M9	C10orf54	1	Y		n16-27c32/33o193-216i
Q9H813	TMEM206	2	0		i65-86o307-332i
Q9H845	ACAD9	0	Y		n3-14c19/20o
Q9H8M5	CNNM2	4	0		o255-279i313-334o340-359i371-391o
Q9HAT2	SIAE	0	Y		n6-17c22/23o
Q9HCU4	CELSR2	7	Y		n17-25c31/32o2379-2401i2413-2429o2435-2459i2480-2500o2520-2541i2562-2583o2589-2612i
Q9HD45	TM9SF3	9	Y		n4-23c28/29o223-245i289-314o326-348i360-384o390-412i447-469o481-507i519-539o551-573i
Q9NPR2	SEMA4B	1	Y		n20-30c38/39o713-733i
Q9NQS3	PVRL3	2	0		i39-62o402-428i
Q9NR12	PDLIM7	0	0	Y/0.503	i
Q9NTK5	OLA1	0	0		i
Q9NV96	TMEM30A	2	0		i44-70o324-346i
Q9NWD8	TMEM248	2	0		o20-41i273-290o
Q9NX62	IMPAD1	1	0		o6-28i
Q9NY35	CLDND1	3	Y		n5-18c26/27o141-164i176-200o212-237i
Q9NZQ7	CD274	1	Y		n3-13c18/19o241-261i
Q9NZU0	FLRT3	1	Y		n8-19c28/29o527-552i
Q9P0K1	ADAM22	1	Y		n4-17c25/26o737-760i
Q9P273	TENM3	1	0		i309-334o
Q9P2B2	PTGFRN	1	Y		n9-16c21/22o831-852i
Q9UBG0	MRC2	1	0		o1413-1436i
Q9UHG3	PCYOX1	0	Y		n8-19c23/24o
Q9UIW2	PLXNA1	1	Y		n10-21c26/27o1243-1267i
Q9UJ14	GGT7	0	0	Y/0.67	i
Q9ULF5	SLC39A10	6	Y		n9-20c25/26o404-431i438-460o494-515i732-753o759-780i801-821o
Q9ULI3	HEG1	1	Y		n13-23c31/32o1248-1273i
Q9UMS4	PRPF19	0	0		i
Q9UN70	PCDHGC3	1	Y		n16-26c31/32o692-718i
Q9UN71	PCDHGB4	1	Y		n14-25c30/31o688-711i
Q9UN76	SLC6A14	12	0		i45-62o74-92i113-144o235-255i264-284o319-336i348-369o407-428i449-476o482-502i523-544o564-586i
Q9Y4D7	PLXND1	1	Y		n5-13c18/19o1272-1294i
Q9Y5G0	PCDHGB5	1	Y		n14-25c30/31o686-709i
Q9Y5L3	ENTPD2	1	Y		n12-22c26/27o461-483i
Q9Y5Y6	ST14	1	0		i55-79o
Q9Y639	NPTN	1	Y		n6-17c28/29o340-360i
Q9Y653	GPR56	7	Y		n6-17c22/23o405-428i449-471o477-495i515-537o575-597i609-631o637-659i
Q9Y6M7	SLC4A7	11	0		o609-631i638-657o696-719i726-744o824-842i862-879o910-929i950-974o1010-1029i1036-1055o1087-1118i

## Sheet: description
Column Heading	Description
UniProt name	UniProt symbol of the protein
Gene symbol	Gene symbol for the assigned N-sialoglycoprotein
TM	The number of predicted transmembrane domains
SP	Whether there is a predicted signal peptide
Non-classic	Whether the protein is secreted through a non-classic pathway
Prediction	Predicted topology of the protein (A signal peptide is given by the position of its h-region separated by a n and a c, and the position of the last amino acid in the signal peptide and the first of the mature protein separated by a /, o means outside the membrane, i means inside the membrane)
