# Supplementary material for: Systematic and site-specific analysis of N-sialoglycosylated proteins on the cell surface by integrating click chemistry and MS-based proteomics
Source: Royal Society of Chemistry journal article supplement (doi:10.1039/c5sc01124h), 2015-01-01
Supplement: c5sc01124h12.xlsx [file c5sc01124h12.xlsx]

## Sheet: Sialylglycopeptide-quantified
Table S7. Quantification of 406 unique N-sialoglycopeptides on the cell surface of breast cancer cells
UniProt name	Gene symbol	Sequence	Peptide ratio	Redun	Obs m/z	z	ppm	XCorr	Delta Corr	ModScore 1	ModScore 2	Site 1	Site 2
D6RDV5	EFNA5	K.VFVR@PTN*DTVHESAEPSR@.G	3.20683	0	514.765	4	0.38	2.438	0.302	1000	0	162	0
O00461	GOLIM4	R.KPDPAEQQN*VTQVAHSPQGYNTAR.E	1.21129	1	880.428	3	0.49	4.125	0.497	148.557	0	257	0
O00478	BTN3A3	R.IHN*VTASDSGK#.Y	3.72038	19	570.288	2	1.15	1.79	0.411	1000	0	115	0
O00592	PODXL	K.QLVLN*LTGNTLCAGGASDEK#.L	1.57303	2	1036.52	2	0.26	4.915	0.25	76.733	0	360	0
O14672	ADAM10	R.EGICNGFTALCPASDPKPN*FTDCNR.H	2.68598	1	948.747	3	-0.51	2.541	0.044	14.062	0	551	0
O14786	NRP1	R.GPECSQN*YTTPSGVIK.S	19.714	5	870.904	2	0.67	4.232	0.529	1000	0	150	0
O14786	NRP1	K.EGFSAN*YSVLQSSVSEDFK#.C	1.42469	7	1052.99	2	-1.8	3.725	0.628	1000	0	261	0
O14786	NRP1	K.IGYSNN*GSDWK#.M	6.96151	7	626.285	2	0.22	2.666	0.123	9.34	0	522	0
O15031	PLXNB2	R.ALSN*ISLR@.L	3.54295	2	441.766	2	0.23	1.829	0.286	1000	0	127	0
O15031	PLXNB2	K.SCVAVTSAQPQN*MSR@.R	3.27376	0	822.887	2	0.65	4.286	0.517	1000	0	528	0
O15031	PLXNB2	K.LSHDAN*ETLPLHLYVK#.S	3.84758	0	466.001	4	0.35	3.233	0.328	1000	0	733	0
O15031	PLXNB2	R.TEAGAFEYVPDPTFEN*FTGGVK#K#.Q	2.772	1	841.743	3	0.26	3.277	0.323	1000	0	1099	0
O15230	LAMA5	R.LN*ASIADLQSQLR@.S	0.798741	0	719.398	2	-0.66	2.967	0.472	1000	0	2209	0
O15230	LAMA5	R.TLSELMSQTGHLGLAN*ASAPSGEQLLR.T	0.701712	0	928.807	3	-0.14	3.909	0.25	1000	0	2303	0
O15394	NCAM2	R.FAMLANNNLQILNIN*K.S	0.196398	2	917.494	2	1.7	4.631	0.12	48.874	0	177	0
O15394	NCAM2	K.SFN*ATAERGEEMTFSCR.A	0.0788484	2	665.953	3	0.84	3.612	0.667	1000	0	219	0
O15394	NCAM2	R.YN*CTATNHIGTR.F	0.144942	1	470.882	3	-0.14	2.789	0.521	49.59	0	474	0
O15394	NCAM2	R.SHGVQTMVVLNNLEPN*TTYEIR.V	0.0430379	1	840.088	3	0.36	2.983	0.224	84.609	0	562	0
O15427	SLC16A3	R.R@PM^AN*GLAAAGSPVFLCALSPLGQLLQDR@.Y	2.02616	7	1018.88	3	0.79	6.17	0.487	1000	0	149	0
O43688	PPAP2C	R.VN*CSVYVQLEK#.V	0.773863	4	675.341	2	0.36	2.953	0.495	1000	0	139	0
O60449	LY75	K.DGHGTAISN*ASDVWK#.K	1.50186	2	523.582	3	0.36	2.029	0.359	1000	0	135	0
O75054	IGSF3	R.KNYN*NTWTR.L	0.263459	1	600.289	2	0.79	2.015	0.168	24.437	0	655	0
O75054	IGSF3	R.LSQAQGN*LSVLETR.Q	0.332379	1	759.905	2	0.68	3.414	0.369	1000	0	825	0
O75054	IGSF3	R.LTVLQASPQDTGN*YSCHVEEWLPSPQK.E	0.372484	1	1029.83	3	0.16	3.497	0.386	1000	0	1077	0
O75144	ICOSLG	K.TVVTYHIPQN*SSLENVDSR.Y	0.103906	2	721.357	3	-1.56	2.536	0.372	30.612	0	70	0
O75197	LRP5	R.IEVANLN*GTSR@.K	1.72638	1	591.819	2	0.5	2.523	0.153	30.835	0	138	0
O75326	SEMA7A	R.HPSCWNLVN*GTVVPLGEMR@.G	5.68792	1	1088.04	2	0.09	3.281	0.17	37.54	0	157	0
O75882	ATRN	R.GICN*SSDVR@.G	1.04532	2	508.736	2	-0.16	1.683	0.374	1000	0	300	0
O76082	SLC22A5	R.VPDAAN*LSSAWR.N	0.190366	3	645.322	2	-0.25	2.507	0.564	1000	0	57	0
O95084	PRSS23	R.GAN*DSTSAMPEQMK#.F	5.69916	1	739.317	2	-0.21	3.252	0.541	1000	0	207	0
O95297	MPZL1	K.EIFVAN*GTQGK#.L	13.9462	5	587.808	2	0.43	2.724	0.434	1000	0	50	0
O95477	ABCA1	K.HPEDVQSSN*GSVYTWR@.E	1.78553	0	935.932	2	0.74	3.98	0.642	1000	0	478	0
O95477	ABCA1	R.EAFN*ETNQAIR@.T	1.72506	0	651.32	2	0.67	3.005	0.3	37.54	0	489	0
P00533	EGFR	R.EFVENSECIQCHPECLPQAMN*ITCTGR@.G	1.28063	4	1097.14	3	2.09	4.879	0.556	100.037	0	568	0
P00533	EGFR	K.TCPAGVM^GEN*NTLVWK#.Y	10.0821	4	902.422	2	-0.32	3.946	0.051	9.34	0	603	0
P01033	TIMP1	K.FVGTPEVN*QTTLYQR@.Y	2.06201	2	881.454	2	0.01	3.829	0.509	1000	0	53	0
P01130	LDLR	R.LTGSDVNLLAENLLSPEDMVLFHN*LTQPR@.G	7.79717	7	1082.56	3	0.56	5.064	0.515	89.827	0	657	0
P01889	HLA-B	R.GYYN*QSEAGSHTLQSM^YGCDVGPDGR@.L	5.33024	6	958.735	3	-0.25	4.698	0.299	1000	0	110	0
P01892	HLA-A	R.GYYN*QSEAGSHTVQR.M	19.9532	1	850.382	2	1.1	4.688	0.617	1000	0	110	0
P01903	HLA-DRA	K.R@SN*YTPITNVPPEVTVLTNSPVELR@.E	1.95633	0	937.845	3	0.72	5.064	0.056	23.523	0	103	0
P02786	TFRC	K.K#DFEDLYTPVN*GSIVIVR@.A	1.05823	1	1041.57	2	2.07	3.951	0.572	1000	0	251	0
P02786	TFRC	K.QNNGAFN*ETLFR.N	0.158984	2	707.336	2	0.35	2.288	0.468	31.275	0	727	0
P04040	CAT	R.HMN*GYGSHTFK#.L	3.59614	0	430.529	3	0.08	3.326	0.409	1000	0	213	0
P04062	GBA	R.TYTYADTPDDFQLHN*FSLPEEDTK.L	0.782222	5	950.756	3	0.26	3.113	0.583	1000	0	185	0
P04156	PRNP	R.YPNQVYYR@PMDEYSNQNNFVHDCVN*ITIK#.Q	16.045	2	910.425	4	0.42	3.71	0.019	26.359	0	181	0
P04156	PRNP	K.GEN*FTETDVK#.M	9.39374	2	575.766	2	0.3	2.798	0.502	1000	0	197	0
P04233	CD74	R.MATPLLMQALPMGALPQGPMQN*ATK#.Y	1.39905	5	1311.17	2	-1.62	3.629	0.422	1000	0	130	0
P04233	CD74	K.YGN*MTEDHVMHLLQNADPLK#.V	3.77022	2	779.705	3	0.85	3.527	0.402	143.502	0	136	0
P04626	ERBB2	K.NNQLALTLIDTN*R@.S	1.07628	3	747.91	2	1.76	2.327	0.452	122.154	0	187	0
P04626	ERBB2	R.GHCWGPGPTQCVN*CSQFLR@.G	1.53416	4	757.334	3	-0.13	4.415	0.523	1000	0	530	0
P05026	ATP1B1	K.LEWLGN*CSGLNDETYGYK.E	2.20106	3	1061.47	2	0.42	5.352	0.243	100.207	0	158	0
P05026	ATP1B1	R.VLGFKPKPPKN*ESLETYPVM^K.Y	6.04168	3	807.77	3	-0.62	3.912	0.381	1000	0	193	0
P05362	ICAM1	R.DHHGAN*FSCR@.T	7.80366	1	403.84	3	0	2.466	0.356	1000	0	183	0
P05362	ICAM1	R.LNPTVTYGN*DSFSAK.A	2.91845	1	808.888	2	-0.16	2.319	0.527	64.398	0	267	0
P05556	ITGB1	K.SCGECIQAGPNCGWCTN*STFLQEGMPTSAR@.C	1.90812	10	1129.14	3	0	4.511	0.169	28.218	0	50	0
P05556	ITGB1	R.NPCTSEQN*CTSPFSYK#.N	14.2129	4	965.9	2	0.26	4.614	0.538	123.857	0	212	0
P05556	ITGB1	K.CHEGN*GTFECGACR.C	13.9825	4	829.306	2	0.66	4.373	0.789	1000	0	481	0
P05556	ITGB1	R.KEN*SSEICSNNGECVCGQCVCR.K	5.67138	5	884.015	3	-0.53	4.9	0.172	100.742	0	520	0
P05556	ITGB1	K.KDTCTQECSYFN*ITK#.V	9.96555	4	953.421	2	0.76	3.918	0.14	1000	0	669	0
P06213	INSR	K.HN*LTITQGK#.L	4.98831	1	511.784	2	0.51	2.863	0.456	1000	0	445	0
P06213	INSR	K.HN*QSEYEDSAGECCSCPK#.T	4.0571	1	723.603	3	0.52	4.936	0.868	1000	0	698	0
P06731	CEACAM5	K.NSGLYTCQAN*NSASGHSR.T	0.0226908	1	642.947	3	0.35	2.74	0.109	30.835	0	480	0
P06733	ENO1	R.HIADLAGNSEVILPVPAFNVIN*GGSHAGNK#.L	1.61155	2	1008.19	3	-1.91	4.286	0.013	9.296	0	154	0
P06733	ENO1	K.LAQAN*GWGVMVSHR@.S	0.684893	1	512.264	3	-0.31	2.503	0.32	1000	0	363	0
P06756	ITGAV	K.AN*TTQPGIVEGGQVLK#.C	2.39562	2	811.941	2	0.99	3.005	0.402	1000	0	74	0
P06756	ITGAV	K.ISSLQTTEKN*DTVAGQGERDHLITK.R	0.935397	3	915.47	3	0.34	3.503	0.343	1000	0	874	0
P07204	THBD	R.GFQWVTGDNN*TSYSR@.W	2.72084	0	870.894	2	0.11	3.995	0.049	9.34	0	116	0
P07686	HEXB	K.LDSFGPINPTLN*TTYSFLTTFFK#.E	0.602674	1	1318.17	2	1.39	4.524	0.372	59.298	0	327	0
P07737	PFN1	R.SSFYVN*GLTLGGQK#.C	2.43572	2	741.385	2	1.11	3.398	0.49	1000	0	62	0
P07996	THBS1	K.VVN*STTGPGEHLR@.N	4.22061	0	688.361	2	-0.17	3.09	0.504	1000	0	1067	0
P08069	IGF1R	R.ACTENNECCHPECLGSCSAPDN*DTACVACR.H	0.293199	2	1173.43	3	0.33	6.128	0.57	92.247	0	244	0
P08069	IGF1R	K.WNPPSLPNGN*LSYYIVR.W	0.329774	1	997.009	2	2.02	2.418	0.119	6.591	0	640	0
P08069	IGF1R	R.DVMQVAN*TTMSSR.S	0.147711	1	721.828	2	-0.36	3.067	0.439	1000	0	747	0
P08174	CD55	K.GSQWSDIEEFCN*R.S	1.10263	10	815.838	2	0.01	2.944	0.407	1000	0	95	0
P08195	SLC3A2	K.DASSFLAEWQN*ITK.G	0.632988	5	806.891	2	0.22	3.043	0.442	1000	0	365	0
P08195	SLC3A2	R.LLIAGTN*SSDLQQILSLLESNK#.D	0.988937	5	1184.65	2	0.19	5.007	0.564	198.394	0	381	0
P08195	SLC3A2	K.SLVTQYLN*ATGNR@.W	0.410613	6	723.382	2	-0.29	3.016	0.352	76.733	0	424	0
P08581	MET	R.HVFPHN*HTADIQSEVHCIFSPQIEEPSQCPDCVVSALGAK#.V	1.89336	2	911.229	5	1.36	3.687	0.327	1000	0	149	0
P08581	MET	R.FINFFVGNTIN*SSYFPDHPLHSISVR@.R	1.00546	2	1006.51	3	0.19	4.281	0.049	16.062	0	202	0
P08581	MET	R.CLQHFYGPNHEHCFN*R@.T	5.29342	2	708.975	3	-0.17	3.57	0.373	76.035	0	399	0
P08648	ITGA5	R.TEK#EPLSDPVGTCYLSTDN*FTR@.I	2.88491	0	849.738	3	-0.02	4.509	0.568	1000	0	182	0
P08648	ITGA5	K.NALN*LTFHAQNVGEGGAYEAELR@.V	0.646244	0	828.41	3	0.81	3.882	0.043	30.835	0	675	0
P08648	ITGA5	K.NLN*NSQSDVVSFR@.L	2.3425	0	744.867	2	0.31	3.048	0.098	9.34	0	773	0
P08648	ITGA5	R.VTGLN*CTTNHPINPK#.G	15.3201	0	838.923	2	-0.78	3.73	0.264	31.275	0	868	0
P08962	CD63	K.NN*HTASILDR.M	2.39745	6	572.286	2	0.56	2.002	0.005	0	0	130	0
P08962	CD63	K.CCGAAN*YTDWEK#.I	0.990515	6	743.29	2	-1.04	3.302	0.593	1000	0	150	0
P09603	CSF1	K.NVFN*ETK#.N	26.1792	3	431.718	2	0.07	1.796	0.412	42.098	0	154	0
P09603	CSF1	K.NCN*NSFAECSSQGHER@.Q	2.44825	0	953.374	2	-0.91	3.828	0.089	24.437	0	172	0
P09758	TACSTD2	R.HR@PTAGAFN*HSDLDAELR@R@.L	1.32556	0	1092.57	2	1.3	3.093	0.275	1000	0	168	0
P10586	PTPRF	R.KVEVEPLN*STAVHVYWK.L	0.68081	5	1001.53	2	0.74	4.909	0.594	1000	0	721	0
P10586	PTPRF	R.DINSQQELQN*ITTDTR.F	0.831709	4	939.95	2	-0.08	3.912	0.518	127.526	0	966	0
P10909	CLU	R.LAN*LTQGEDQYYLR.V	0.251068	6	843.914	2	-0.56	3.381	0.444	1000	0	374	0
P11047	LAMC1	K.IPAIN*QTITEANEK.T	0.639515	0	772.907	2	1.05	3.096	0.515	109.529	0	1395	0
P11142	HSPA8	K.TVTNAVVTVPAYFN*DSQR@.Q	1.11973	7	996.007	2	-0.07	2.787	0.326	49.59	0	151	0
P11166	SLC2A1	K.VIEEFYN*QTWVHR.Y	0.955813	2	862.421	2	1.87	3.496	0.425	1000	0	45	0
P11279	LAMP1	R.SSCGK#EN*TSDPSLVIAFGR@.G	0.739668	1	681.337	3	1.82	2.494	0.306	1000	0	84	0
P11279	LAMP1	R.GHTLTLN*FTR@.N	1.12471	1	584.82	2	1.87	1.994	0.403	1000	0	103	0
P11717	IGF2R	R.MSVINFECN*K#.T	0.832112	0	626.787	2	-0.29	1.896	0.028	20.167	0	435	0
P11717	IGF2R	K.HFN*YTSLIAFHCK.R	0.428733	0	547.597	3	-0.87	2.581	0.335	1000	0	1757	0
P13473	LAMP2	K.WQMN*FTVR@.Y	1.03344	2	545.77	2	0.18	1.75	0.304	1000	0	49	0
P13473	LAMP2	K.TVTISDHGTVTYN*GSICGDDQNGPK.I	0.990686	3	880.398	3	0.52	3.829	0.325	133.582	0	75	0
P13473	LAMP2	K.IAVQFGPGFSWIAN*FTK.A	1.39779	3	943.49	2	-0.71	4.746	0.513	1000	0	101	0
P13473	LAMP2	K.VASVININPN*TTHSTGSCR.S	6.51132	5	1016	2	1.4	4.554	0.21	30.835	0	257	0
P13598	ICAM2	K.HYLVSN*ISHDTVLQCHFTCSGK#.Q	0.526553	4	654.309	4	-0.13	3.781	0.445	1000	0	82	0
P13598	ICAM2	K.QESMNSN*VSVYQPPR@.Q	1.41318	4	872.911	2	-0.05	2.932	0.191	6.591	0	105	0
P13598	ICAM2	R.GN*ETLHYETFGK#.A	3.39015	5	703.832	2	0.1	2.856	0.337	1000	0	153	0
P13598	ICAM2	K.AAPAPQEATATFN*STADR@EDGHR@.N	1.48797	4	1214.58	2	1.09	2.852	0.391	1000	0	176	0
P13726	F3	K.VN*VTVEDER@.T	11.0575	1	535.271	2	0.12	2.386	0.434	1000	0	156	0
P13726	F3	R.R@N*NTFLSLR@.D	73.657	1	568.329	2	0.57	2.695	0.151	24.437	0	169	0
P13987	CD59	K.TAVN*CSSDFDACLITK#.A	0.421543	3	906.911	2	1.19	3.758	0.578	1000	0	43	0
P15328	FOLR1	K.NACCSTN*TSQEAHK#.D	1.79932	0	540.224	3	0.34	2.585	0.526	58.167	0	69	0
P15328	FOLR1	K.GWN*WTSGFNK#.C	1.6591	0	604.279	2	0.3	2.747	0.324	123.857	0	161	0
P15514	AREG	R.VEQVVK#PPQN*K#.T	4.34348	1	642.873	2	0.15	2.683	0.407	1000	0	113	0
P15529	CD46	K.GYFYIPPLATHTICDR@N*HTWLPVSDDACYR@.E	1.27249	14	1218.58	3	0.26	3.565	0.355	1000	0	83	0
P16070	CD44	K.AFN*STLPTM^AQMEK#.A	11.351	26	798.374	2	-0.63	2.902	0.016	1000	0	57	0
P16144	ITGB4	K.HNIIPIFAVTN*YSYSYYEK#.L	11.375	4	1167.08	2	0.59	5.419	0.577	171.488	0	327	0
P16144	ITGB4	R.CSFR@DEDDDCTYSYTMEGDGAPGPN*STVLVHK#.K	5.84519	4	910.886	4	-0.11	5.115	0.64	1000	0	695	0
P17181	IFNAR1	K.LSGCQN*ITSTK.C	4.06865	5	606.295	2	-0.39	2.717	0.586	1000	0	81	0
P17301	ITGA2	K.LNLQTSTSIPN*VTEMK#.T	5.4315	4	893.965	2	0.16	4.656	0.644	143.484	0	105	0
P17301	ITGA2	R.YFFN*VSDEAALLEK#.A	3.84598	3	828.911	2	0.63	4.079	0.572	1000	0	343	0
P17301	ITGA2	R.TASCSN*VTCWLK#.D	13.5879	0	719.327	2	-0.22	1.924	0.446	1000	0	1057	0
P18084	ITGB5	K.CHAGYIGDNCN*CSTDISTCR@.G	2.59053	1	790.645	3	0.55	4.444	0.172	59.298	0	586	0
P20645	M6PR	R.EAGN*HTSGAGLVQINK.S	0.368146	3	799.905	2	0.52	4.169	0.458	182.307	0	83	0
P21589	NT5E	R.IK#LDN*YSTQELGK#.T	54.6254	3	764.41	2	0.27	3.934	0.518	1000	0	333	0
P21589	NT5E	R.SPIDER@NN*GTITWENLAAVLPFGGTFDLVQLK#.G	2.47469	1	1178.29	3	0.62	4.067	0.018	0	0	403	0
P21860	ERBB3	R.QLCYHHSLN*WTK.V	0.278018	2	795.375	2	0.12	2.58	0.386	1000	0	469	0
P21980	TGM2	R.TVSYN*GILGPECGTK#.Y	2.19504	3	803.892	2	0.16	2.898	0.583	1000	0	517	0
P22314	UBA1	K.N*GFLNLALPFFGFSEPLAAPR@.H	1.23619	1	1144.11	2	0.69	5.185	0.072	6.591	0	924	0
P22413	ENPP1	K.MN*ASFSLK#.S	5.42472	1	454.73	2	0.13	2.17	0.337	1000	0	285	0
P22413	ENPP1	K.MYN*GSVPFEER@.I	14.218	1	669.305	2	0.17	2.474	0.491	1000	0	341	0
P23229	ITGA6	K.QLSCVANQN*GSQADCELGNPFK#.R	4.27923	7	816.701	3	-0.28	3.208	0.065	0	0	770	0
P23229	ITGA6	K.EINSLN*LTESHNSR@K#.K	1.32928	6	879.956	2	-0.74	3.406	0.349	24.243	0	930	0
P23470	PTPRG	K.VEFHWGHSN*GSAGSEHSINGR@.R	6.79301	1	569.262	4	0.46	3.469	0.392	16.579	0	156	0
P25942	CD40	K.DLVVQQAGTN*K#TDVVCGPQDR@.L	0.988628	0	773.055	3	-0.56	4.869	0.442	1000	0	180	0
P26006	ITGA3	R.ELAVPDGYTN*R@.T	22.8758	2	622.311	2	0.52	2.322	0.393	1000	0	86	0
P26006	ITGA3	K.DDCER@MN*ITVK#.N	3.73019	2	466.554	3	0.03	2.384	0.444	1000	0	107	0
P26006	ITGA3	K.N*ITIVTGAPR@.H	24.0248	2	525.811	2	0.32	2.395	0.45	1000	0	265	0
P26006	ITGA3	R.R@N*ITLAYTLEADR@DR@.R	9.383	1	914.501	2	0.35	2.542	0.327	1000	0	511	0
P26006	ITGA3	K.LR@PIIISMN*YSLPLR@.M	28.2818	1	601.028	3	0.68	3.024	0.366	1000	0	573	0
P26006	ITGA3	K.LLLSIN*VTNTR@.T	7.96004	2	626.877	2	0.48	2.911	0.205	73.311	0	656	0
P26006	ITGA3	R.AHCVWLECPIPDAPVVTN*VTVK#.A	9.73479	1	839.427	3	0.71	5	0.315	1000	0	926	0
P26006	ITGA3	R.VN*GWATLFLR@.T	1.347	1	593.334	2	0.21	2.493	0.33	1000	0	951	0
P26006	ITGA3	R.TSIPTINMEN*K#.T	49.7647	1	629.82	2	0.32	2.213	0.076	5.085	0	969	0
P27701	CD82	R.DYN*SSR@EDSLQDAWDYVQAQVK#.C	1.78058	2	878.739	3	0.17	5.012	0.565	1000	0	129	0
P28827	PTPRM	R.FIASFNVVN*TTK#.R	3.76683	5	676.365	2	-0.27	2.111	0.22	37.54	0	249	0
P28827	PTPRM	K.ISAPSMPAYELETPLN*QTDNTVTVMLK#PAHSR@.G	1.98804	5	882.95	4	0.32	3.389	0.082	8.043	0	598	0
P29317	EPHA2	R.TSVTVSDLEPHM^N*YTFTVEAR@.N	6.25821	0	808.052	3	0.03	1.99	0.349	1000	0	407	0
P29317	EPHA2	R.TASVSIN*QTEPPK#.V	5.34633	0	691.86	2	-0.21	2.637	0.339	1000	0	435	0
P29323	EPHB2	K.AGFEAVEN*GTVCR@.G	5.65862	4	709.831	2	-0.72	2.88	0.566	1000	0	265	0
P30479	HLA-B	R.GYYN*QSEAGSHTWQR@.M	37.708	2	896.897	2	0.18	4.387	0.634	1000	0	110	0
P30530	AXL	R.TVAANTPFN*LSCQAQGPPEPVDLLWLQDAVPLATAPGHGPQR@.S	4.33115	1	1111.57	4	0.09	4.924	0.091	2.37	0	157	0
P30530	AXL	R.SLHVPGLN*K#.T	3.98782	1	488.283	2	-0.27	2.148	0.365	1000	0	198	0
P30530	AXL	R.VACTSSQGPSSWTHWLPVETPEGVPLGPPEN*ISATR@.N	1.3696	2	964.222	4	-0.15	3.079	0.371	1000	0	339	0
P30530	AXL	R.N*GSQAFVHWQEPR@.A	1.68197	2	782.877	2	-0.87	2.893	0.453	1000	0	345	0
P30825	SLC7A1	K.NWQLTEEDFGN*TSGR.L	0.175082	0	878.887	2	0.43	4.296	0.673	166.39	0	226	0
P32004	L1CAM	K.EELGVTVYQSPHSGSFTITGN*NSNFAQR@.F	2.45097	6	1017.15	3	0.41	4.726	0.022	7.71	0	100	0
P32004	L1CAM	R.VTMGQNGNLYFANVLTSDN*HSDYICHAHFPGTR@.T	4.00361	4	749.948	5	0.06	3.257	0.259	23.711	0	203	0
P32004	L1CAM	R.LLFPTN*SSSHLVALQGQPLVLECIAEGFPTPTIK#.W	4.63349	4	922.997	4	0.91	4.114	0.43	1000	0	247	0
P32004	L1CAM	R.FFPYAN*GTLGIR@.D	2.77964	4	682.863	2	-0.08	2.389	0.284	1000	0	479	0
P32004	L1CAM	K.VPGN*QTSTTLK#.L	4.31317	5	578.813	2	0.14	2.373	0.225	1000	0	671	0
P32004	L1CAM	K.NPVDVK#GEGN*ETTNMVITWK#PLR@.W	4.26324	5	656.599	4	0.6	4.086	0.203	34.089	0	726	0
P32004	L1CAM	R.GPWQEQIVSDPFLVVSN*TSTFVPYEIK.V	1.54237	4	1028.52	3	0.65	3.22	0.234	1000	0	777	0
P32004	L1CAM	R.GSGPASEFTFSTPEGVPGHPEALHLECQSN*TSLLLR@.W	4.92099	4	958.718	4	0.36	4.488	0.359	1000	0	931	0
P32004	L1CAM	R.THN*LTDLSPHLR.Y	8.50346	4	703.866	2	-1.2	2.725	0.473	1000	0	979	0
P35052	GPC1	R.ICPQGYTCCTSEMEENLAN*R@.S	1.47432	4	1221.5	2	-0.54	4.734	0.093	19.843	0	79	0
P35052	GPC1	R.SFDDHFQHLLN*DSER.T	5.73244	4	931.913	2	0.29	4.535	0.534	1000	0	116	0
P35613	BSG	K.ILLTCSLN*DSATEVTGHR.W	1.15185	2	995.494	2	0.86	4.057	0.546	1000	0	160	0
P36941	LTBR	K.AGHFQN*TSSPSAR@.C	2.50125	4	684.828	2	0.57	2.572	0.436	1000	0	177	0
P40189	IL6ST	R.ETHLETN*FTLK#.S	0.577683	3	672.345	2	0.38	2.393	0.385	1000	0	157	0
P40189	IL6ST	K.VKPNPPHN*LSVINSEELSSILK.L	9.57153	3	806.776	3	0.37	3.009	0.046	12.431	0	227	0
P40189	IL6ST	K.SHLQN*YTVNATK#.L	3.30179	1	693.854	2	0.96	3.699	0.375	97.748	0	379	0
P40189	IL6ST	K.LTVN*LTNDR@.Y	6.04922	1	527.79	2	0.1	2.155	0.267	37.54	0	390	0
P42892	ECE1	K.HLLEN*STASVSEAERK.A	8.3739	5	591.967	3	0.4	3.754	0.465	1000	0	166	0
P42892	ECE1	R.DYYLN*KTENEK.V	2.84721	4	710.329	2	-0.76	2.923	0.281	59.298	0	270	0
P42892	ECE1	K.LLGGGDEEAIR@PQMQQILDFETALAN*ITIPQEK#.R	1.94511	4	1219.3	3	-0.12	3.848	0.302	1000	0	316	0
P42892	ECE1	R.FFN*FSWR.V	3.12152	4	503.738	2	1.14	1.903	0.402	1000	0	539	0
P42892	ECE1	K.R@QTECMVEQYSN*YSVNGEPVNGR@.H	2.38204	4	911.415	3	-0.91	4.641	0.288	71.067	0	651	0
P43121	MCAM	R.CVASVPSIPGLN*R@.T	2.40469	1	689.871	2	0.67	2.128	0.353	1000	0	418	0
P46977	STT3A	R.TILVDNNTWN*NTHISR.V	0.863729	1	950.973	2	-0.4	4.388	0.07	9.34	0	548	0
P48509	CD151	R.YHQPGHEAVTSAVDQLQQEFHCCGSN*NSQDWR@.D	5.02588	5	949.413	4	0.05	4.755	0.022	14.966	0	159	0
P48960	CD97	R.WCPQNSSCVN*ATACR@.C	19.525	6	910.379	2	-0.07	4.036	0.329	51.004	0	38	0
P48960	CD97	K.TFK#N*ESENTCQDVDECSSGQHQCDSSTVCFNTVGSYSCR@.C	6.96682	2	1150.21	4	0.23	4.376	0.095	31.769	0	108	0
P48960	CD97	R.GDK#N*VTMGQSSAR@.M	10.7603	2	684.338	2	1.8	2.393	0.364	1000	0	371	0
P48960	CD97	R.R@LSAVNSIFLSHN*NTK#.E	61.1254	2	606.67	3	0.83	4.932	0.083	30.835	0	453	0
P50895	BCAM	R.TQN*FTLLVQGSPELK#.T	0.577483	0	843.459	2	0.76	2.89	0.436	1000	0	439	0
P50990	CCT8	R.TAYGPN*GMNK#.M	2.04004	2	532.247	2	0.43	2.781	0.089	24.243	0	50	0
P52798	EFNA4	R.HVVYWN*SSNPR.L	0.41201	2	681.329	2	1.53	1.992	0.273	13.38	0	33	0
P54709	ATP1B3	K.N*LTVCPDGALFEQK.G	5.75115	2	797.887	2	-0.02	2.404	0.354	1000	0	124	0
P54709	ATP1B3	K.K#LHVGYLQPLVAVQVSFAPN*NTGK#.E	2.03496	0	650.617	4	-0.04	3.424	0.019	17.009	0	240	0
P54760	EPHB4	R.LN*GSSLHLEWSAPLESGGR@.E	0.864657	1	1010.01	2	0.16	3.902	0.52	1000	0	335	0
P54803	GALC	R.NPN*ITLIGLPWSFPGWLGK.G	0.711211	5	1057.07	2	2.54	3.923	0	0	0	143	0
P54852	EMP3	K.ESLNLWYDCTWNN*DTK#.T	1.72554	2	1035.45	2	1.28	2.985	0.009	24.437	0	47	0
P56159	GFRA1	K.ETN*FSLASGLEAK.D	0.0716917	1	685.341	2	0.83	3.397	0.465	1000	0	59	0
P56199	ITGA1	K.QTQVGIVQYGEN*VTHEFNLNK#.Y	4.57874	0	810.407	3	-0.27	2.82	0.208	6.591	0	217	0
P56199	ITGA1	K.VYVYALN*QTR@.F	5.84013	0	618.334	2	0.41	2.92	0.453	1000	0	532	0
P62841	RPS15	R.DMIILPEMVGSMVGVYN*GK#.T	1.22421	5	1032.52	2	1.98	4.719	0.497	1000	0	98	0
P62937	PPIA	K.HTGPGILSMANAGPNTN*GSQFFICTAK#.T	3.46583	3	934.782	3	-0.09	5.889	0.178	20.167	0	108	0
P78310	CXADR	K.SGDASIN*VTNLQLSDIGTYQCK#.V	0.852074	5	1198.08	2	1.67	3.077	0.311	53.534	0	106	0
P78325	ADAM8	R.CCN*STTCQLAEGAQCAHGTCCQECK#.V	1.86574	2	1001.37	3	-0.11	5.083	0.71	1000	0	436	0
P78536	ADAM17	R.EQQLESCACN*ETDNSCK.V	1.28498	1	1038.4	2	-0.19	4.223	0.202	44.278	0	594	0
P98172	EFNB1	K.HHDYYITSTSN*GSLEGLENR.E	0.669961	0	766.017	3	-0.15	3.894	0.553	161.681	0	139	0
Q01973	ROR1	K.DSYLTLDEPMNN*ITTSLGQTAELHCK#.V	1.21879	1	988.132	3	0.96	3.465	0.073	0	0	66	0
Q01973	ROR1	K.CYN*STGVDYR@.G	3.16532	1	622.265	2	-0.46	2.652	0.481	1000	0	315	0
Q02878	RPL6	R.SVFALTN*GIYPHK.L	1.16002	0	725.386	2	1.86	2.667	0.302	1000	0	279	0
Q03405	PLAUR	K.GN*STHGCSSEETFLIDCR@.G	2.43311	6	693.63	3	0.58	3.564	0.481	1000	0	222	0
Q07954	LRP1	R.FN*STEYQVVTR@.V	3.55648	0	676.838	2	0.26	3.358	0.393	1000	0	446	0
Q07954	LRP1	K.WTGHN*VTVVQR@.T	1.56401	0	653.348	2	-0.77	2.759	0.422	1000	0	1511	0
Q07954	LRP1	R.MHLN*GSNVQVLHR@.T	3.02314	0	757.399	2	1.54	4.287	0.261	73.311	0	3089	0
Q08174	PCDH1	K.AN*DSDQGANAEIEYTFHQAPEVVR.R	0.534607	4	888.74	3	0.34	4.442	0.176	101.329	0	305	0
Q08380	LGALS3BP	R.ALGFEN*ATQALGR.A	1.29527	7	675.849	2	0.69	2.306	0.421	1000	0	69	0
Q08380	LGALS3BP	R.TVIR@PFYLTN*SSGVD.-	0.793251	0	839.438	2	0.55	2.645	0.474	1000	0	580	0
Q08722	CD47	K.GRDIYTFDGALN*K.S	2.3365	3	736.867	2	0.14	2.978	0.281	1000	0	73	0
Q08722	CD47	K.SDAVSHTGN*YTCEVTELTR@.E	1.96285	3	1074.99	2	1.09	4.396	0.639	1000	0	111	0
Q10589	BST2	R.N*VTHLLQQELTEAQK#.G	9.00296	1	881.97	2	0.36	4.728	0.404	1000	0	65	0
Q10589	BST2	K.GFQDVEAQAATCN*HTVMALMASLDAEK#.A	1.23358	1	973.781	3	-0.16	3.395	0.295	1000	0	92	0
Q12913	PTPRJ	K.AALSWSNGN*GTASCR@.V	3.16071	1	780.857	2	0.35	3.014	0.023	6.591	0	231	0
Q12913	PTPRJ	K.IHVAGETDSSNLN*VSEPR@.A	5.86589	1	645.319	3	-0.98	5.313	0.044	76.733	0	413	0
Q12913	PTPRJ	R.NTCTTGITDPPPPDGSPN*ITSVSHNSVK#.V	5.52395	0	968.794	3	0.37	3.137	0.31	28.218	0	824	0
Q13200	PSMD2	R.MNLASSFVN*GFVNAAFGQDK#.L	1.23829	2	1064.51	2	-0.48	5.284	0.247	59.298	0	378	0
Q13308	PTK7	R.SAN*ASFNIK#.W	1.65766	8	481.75	2	0.11	2.195	0.303	76.733	0	116	0
Q13308	PTK7	R.DGTPLSDGQSN*HTVSSK#.E	1.89021	6	870.904	2	0.1	3.767	0.612	1000	0	175	0
Q13308	PTK7	R.R@ATVFAN*GSLLLTQVR@PR@.N	2.71688	7	674.073	3	-0.68	3.901	0.415	1000	0	283	0
Q13308	PTK7	R.R@QDVN*ITVATVPSWLK#.K	0.384818	5	922.521	2	0.06	4.21	0.531	1000	0	405	0
Q13308	PTK7	R.MHIFQN*GSLVIHDVAPEDSGR@.Y	1.56152	4	777.718	3	0.39	3.555	0.399	1000	0	646	0
Q13332	PTPRS	R.KVEAEALN*ATAIR.V	1.41132	6	694.885	2	0.24	2.809	0.332	1000	0	733	0
Q13421	MSLN	R.K#WN*VTSLETLK#.A	3.11569	5	669.381	2	0.82	2.191	0.313	1000	0	388	0
Q13421	MSLN	R.LAFQNMN*GSEYFVK#.I	1.78095	5	829.897	2	0.5	2.6	0.258	30.835	0	496	0
Q13433	SLC39A6	R.YGEN*NSLSVEGFR@K#.L	1.49195	0	808.903	2	-0.17	3.259	0.163	24.437	0	67	0
Q13433	SLC39A6	R.NTNENPQECFN*ASK#.L	1.29724	0	832.353	2	-0.25	3.662	0.358	71.753	0	266	0
Q13433	SLC39A6	K.LLTSHGMGIQVPLN*ATEFNYLCPAIINQIDAR@.S	1.07942	0	1193.62	3	1.03	4.127	0.186	24.632	0	283	0
Q13641	TPBG	R.N*LTEVPTDLPAYVR.N	0.21828	0	795.917	2	0.19	2.604	0.428	1000	0	81	0
Q13641	TPBG	R.N*LTHLESLHLEDNALK.V	0.537691	0	925.481	2	0.92	3.758	0.381	148.282	0	256	0
Q13641	TPBG	K.VLHN*GTLAELQGLPHIR.V	1.16712	0	624.351	3	-0.01	3.31	0.332	1000	0	275	0
Q13740	ALCAM	K.DRLNLSEN*YTLSISNAR.I	3.13616	3	984.992	2	-5.21	4.758	0.306	97.748	0	95	0
Q13740	ALCAM	K.LGDCISEDSYPDGN*ITWYR.N	3.48438	2	1132.49	2	-0.74	3.063	0.643	1000	0	167	0
Q13740	ALCAM	K.NAIK#EGDN*ITLK#.C	0.519808	2	667.873	2	0.29	2.998	0.521	87.265	0	265	0
Q13740	ALCAM	K.IIISPEEN*VTLTCTAENQLER.T	3.97747	4	1217.11	2	1.32	4.041	0.545	120.756	0	480	0
Q13740	ALCAM	R.TVNSLN*VSANENR@.E	2.68356	0	713.859	2	0.2	3.211	0.323	53.534	0	499	0
Q13873	BMPR2	R.ISHEN*GTILCSK#.G	1.37664	1	685.343	2	1.73	3.343	0.534	1000	0	55	0
Q14126	DSG2	K.IN*ATDADEPNTLNSK#.I	1.49211	1	807.386	2	1.13	4.253	0.577	150.768	0	182	0
Q14126	DSG2	R.YVQN*GTYTVK.I	2.7468	0	588.295	2	0.24	2.027	0.334	1000	0	462	0
Q14517	FAT1	K.TGALTVQN*TTQLR@.S	6.41145	0	706.391	2	0.67	2.8	0.343	1000	0	1940	0
Q14517	FAT1	R.QVTQEMLN*HTIAIR@.F	2.07563	0	831.945	2	0.54	2.959	0.481	1000	0	3640	0
Q14997	PSME4	K.HLAGLFNSITSFYHPSNN*GR@.W	1.05208	1	747.706	3	0.04	4.246	0.007	7.71	0	346	0
Q15223	PVRL1	R.NPN*GTVTVISR@.Y	1.55863	2	583.821	2	-1.27	2.258	0.351	36.655	0	202	0
Q15758	SLC1A5	R.SYSTTYEER@N*ITGTR@.V	0.562822	2	896.935	2	-0.04	2.863	0.39	1000	0	212	0
Q16563	SYPL1	K.GQTEIQVNCPPAVTEN*K#.T	1.32148	2	948.462	2	0.78	4.772	0.591	115.01	0	71	0
Q24JP5	TMEM132A	R.VQQVGHYPPAN*SSLSSR.S	0.885	2	915.456	2	0.91	3.563	0.563	1000	0	71	0
Q29980	MICB	R.AQTLAMN*VTNFWK#.E	1.42341	2	767.889	2	0.54	2.751	0.204	24.243	0	164	0
Q29980	MICB	R.QDGVSLSHNTQQWGDVLPDGN*GTYQTWVATR@.I	1.7364	2	1147.21	3	2.47	4.179	0.363	121.502	0	261	0
Q29983	MICA	R.AK#PQGQWAEDVLGN*K#.T	5.70509	2	553.957	3	0.58	3.456	0.442	1000	0	79	0
Q29983	MICA	R.VCEIHEDN*STR.S	2.30114	1	681.797	2	2.08	2.374	0.358	1000	0	125	0
Q29983	MICA	R.SEASEGN*ITVTCR.A	2.08688	3	713.822	2	0.53	2.447	0.478	1000	0	220	0
Q29983	MICA	R.QDGVSLSHDTQQWGDVLPDGN*GTYQTWVATR@.I	1.00469	3	1147.54	3	0.53	4.727	0.428	1000	0	261	0
Q29983	MICA	R.FTCYMEHSGN*HSTHPVPSGK#.V	12.8034	3	762.001	3	0.23	4.013	0.557	1000	0	289	0
Q3MIR4	TMEM30B	R.QGN*YSAGLPR.G	2.46476	0	533.264	2	-0.44	1.905	0.351	1000	0	273	0
Q4KMQ2	ANO6	K.NIN*GTDPIQK#.Y	1.28018	3	555.792	2	-0.34	2.038	0.347	19.843	0	493	0
Q4KMQ2	ANO6	K.SK#GNPYSDLGN*HTTCR@.Y	1.78602	3	608.619	3	0.84	3.374	0.428	75.738	0	802	0
Q5VW38	GPR107	K.VLGQSQEPNVNPASAGN*QTQK.T	0.0904993	3	1085.53	2	-0.23	4.933	0.388	71.753	0	169	0
Q5VY80	RAET1L	K.TFLHYDCGN*K#.T	1.83077	1	633.284	2	0.55	2.545	0.585	1000	0	68	0
Q5ZPR3	CD276	K.QLVHSFAEGQDQGSAYAN*R@.T	0.385165	8	1043.99	2	-0.25	4.435	0.673	1000	0	91	0
Q5ZPR3	CD276	R.TALFPDLLAQGN*ASLR@.L	0.69508	8	848.467	2	0.17	2.437	0.367	1000	0	104	0
Q5ZPR3	CD276	R.VVLGAN*GTYSCLVR.N	0.540494	6	756.393	2	0.44	3.049	0.614	1000	0	215	0
Q6EMK4	VASN	R.LHEITN*ETFR@.G	1.61961	0	634.827	2	0.3	2.941	0.341	1000	0	117	0
Q6H3X3	RAET1G	K.K#LN*VTTAWK#.A	0.762522	3	540.32	2	0.17	2.125	0.289	1000	0	82	0
Q6P4F1	FUT10	K.LFHK#PVITLFN*YTATFSR@.H	0.515073	5	724.735	3	-1.15	3.398	0.4	1000	0	168	0
Q6PIU2	NCEH1	R.LN*WTSLLPASFTK#.N	2.49035	4	744.908	2	1.12	3.419	0.499	1000	0	287	0
Q6UVK1	CSPG4	R.AGQPATAFSQQDLLDGAVLYSHN*GSLSPR@.D	1.27983	0	1003.84	3	0.83	3.9	0.518	1000	0	1202	0
Q6UXD5	SEZ6L2	R.LLAN*SSMLGEGQVLR.S	0.103834	4	795.924	2	0.48	3.392	0.484	1000	0	247	0
Q6V0I7	FAT4	R.VN*LSEEAPPGSYVSGISATDGDSGLNANLR@.Y	0.489354	1	1000.49	3	0.44	5.064	0.124	49.425	0	483	0
Q6V0I7	FAT4	R.IN*VSLLDINDNSPVFYPVQYFAHIK#.E	1.63983	1	973.175	3	-0.55	4.019	0.137	84.609	0	676	0
Q6V0I7	FAT4	R.IN*ATTGEIFNK#.Q	2.27529	2	609.821	2	0.5	2.447	0.421	132.105	0	2921	0
Q7LGA3	HS2ST1	K.YHVLHIN*TTK.N	0.327224	4	410.223	3	-1.29	2.962	0.393	1000	0	108	0
Q7Z4F1	LRP10	R.TSPAN*CTWLILGSK#.E	2.12292	1	779.899	2	-0.44	2.403	0.403	1000	0	56	0
Q7Z4F1	LRP10	R.GFN*ATYHVR@.G	2.61906	2	537.271	2	-1.02	2.757	0.509	1000	0	299	0
Q7Z5N4	SDK1	R.TN*QSIMVQWQPPPETEHNGVLR.G	0.380021	2	855.42	3	0.09	3.04	0.295	62.528	0	782	0
Q7Z6M3	MILR1	K.YDR@EPAEFN*LTK#.K	1.22923	1	750.376	2	-0.4	3.057	0.39	1000	0	182	0
Q7Z7H5	TMED4	R.FTFTSHTPGDHQICLHSN*STR.M	0.162234	3	612.283	4	0.28	2.595	0.383	1000	0	117	0
Q86SJ2	AMIGO2	R.HNN*ITSISTGSFSTTPNLK.C	0.419211	0	1011.51	2	0.45	5.105	0.065	12.218	0	104	0
Q86SQ4	GPR126	K.ILSN*LSCNVK#.G	0.605689	3	579.812	2	0.14	2.096	0.455	59.298	0	324	0
Q8IWA5	SLC44A2	K.GVLM^VGN*ETTYEDGHGSR.K	0.509499	4	970.932	2	1.69	2.998	0.579	1000	0	187	0
Q8IWA5	SLC44A2	R.K#N*ITDLVEGAK#.K	0.958068	3	603.845	2	2.72	2.056	0.373	1000	0	200	0
Q8IWA5	SLC44A2	K.TCNPETFPSSN*ESR@.Q	0.493065	2	817.85	2	-0.52	3.75	0.609	84.609	0	417	0
Q8IWK6	GPR125	R.VLYMFNQMPLN*LTNAVATAR@.Q	0.903909	3	1138.59	2	1.38	4.337	0.263	24.243	0	433	0
Q8IZF2	GPR116	K.ANEQVVQSLN*QTYK#.M	2.58677	3	816.914	2	0.68	4.785	0.586	139.126	0	256	0
Q8IZF2	GPR116	K.EVLSSN*VSWR@.Y	0.509887	2	593.307	2	-1.57	2.072	0.404	1000	0	301	0
Q8IZF2	GPR116	R.YEEQQLEIQN*SSR@.F	2.3508	2	816.888	2	-0.38	3.94	0.577	1000	0	315	0
Q8IZF2	GPR116	K.HNFN*ASSVSWCSK#.T	2.20756	4	767.84	2	0.11	3.725	0.251	48.874	0	627	0
Q8IZF2	GPR116	K.TVDVCCHFTNAAN*NSVWSPSMK#.L	1.78244	4	846.037	3	-3.1	4.741	0.085	17.009	0	649	0
Q8IZF2	GPR116	K.LNLVPGEN*ITCQDPVIGVGEPGK#.V	2.73616	4	1209.12	2	-1.11	4.696	0.234	70.435	0	666	0
Q8N441	FGFRL1	R.SK#PVLTGTHPVN*TTVDFGGTTSFQCK#.V	1.29868	0	700.353	4	0.29	3.243	0.319	1000	0	255	0
Q8N441	FGFRL1	R.HN*STIDVGGQK#.F	4.86503	0	583.793	2	0.47	2.736	0.525	1000	0	293	0
Q8N8Z6	DCBLD1	K.NYPGTYPN*HTVCEK.T	0.739437	2	841.872	2	-0.09	3.102	0.566	42.565	0	64	0
Q8N8Z6	DCBLD1	R.ASSSWQSVN*ESGDQVHWSPGQAR.L	0.678138	1	1252.06	2	1.57	5.264	0.586	1000	0	277	0
Q8NBJ4	GOLM1	K.AVLVNN*ITTGER.L	1.35599	2	645.351	2	0.15	2.7	0.108	24.437	0	109	0
Q8NBJ5	COLGALT1	R.TALWVATDHNMDN*TSTVLR@.E	1.06585	0	1077.53	2	0.47	4.481	0.197	37.54	0	96	0
Q8NC42	RNF149	R.RN*ASAVVLYNEER.Y	0.804827	1	762.387	2	-1.98	3.832	0.48	99.228	0	131	0
Q8NFZ8	CADM4	R.WNR@GN*ESLPER@.A	0.452425	0	686.848	2	0.11	2.578	0.091	37.54	0	262	0
Q8TBP5	FAM174A	R.GSEGGN*GSNPVAGLETDDHGGK.A	0.160835	0	686.635	3	0.22	2.941	0.271	23.624	0	83	0
Q8TCJ2	STT3B	R.TTLVDNNTWN*NSHIALVGK#.A	0.77542	0	703.364	3	0.73	2.577	0.046	17.009	0	627	0
Q8TE58	ADAMTS15	R.GAEYVISPLPN*ASAPAAQR@.N	1.72047	0	961.005	2	0.53	4.253	0.461	1000	0	141	0
Q8TE58	ADAMTS15	K.SFR@EEQCEAFNGYN*HSTNR@.L	1.59953	0	787.679	3	-0.16	5.952	0.268	67.841	0	591	0
Q8WVQ1	CANT1	R.LGQAPANWYN*DTYPLSPPQR.T	0.193989	2	1146.05	2	0.37	4.47	0.285	53.534	0	88	0
Q92508	PIEZO1	K.HMLALAPN*STAR@.R	1.67557	1	645.844	2	-1.41	2.789	0.486	1000	0	2331	0
Q92542	NCSTN	R.TSLELWMHTDPVSQK#N*ESVR@.N	2.91269	7	792.064	3	-0.04	4.133	0.556	1000	0	387	0
Q92542	NCSTN	R.R@PN*QSQPLPPSSLQR@.F	1.58672	6	860.475	2	0.27	3.921	0.417	1000	0	417	0
Q92542	NCSTN	K.DLYEYSWVQGPLHSN*ETDR@LPR@.C	0.563671	3	673.335	4	1.44	3.015	0.323	1000	0	612	0
Q92729	PTPRU	K.LRN*ETYHVFSNLHPGTTYLFSVR.A	1.28895	5	689.352	4	-0.49	3.21	0.311	37.327	0	548	0
Q92823	NRCAM	R.ERPPTFLTPEGN*ASNKEELR.G	0.242012	8	763.388	3	3.78	4.193	0.22	33.657	0	276	0
Q92854	SEMA4D	R.AAN*YTSSLNLPDK#.T	2.46579	2	702.853	2	0.13	2.965	0.556	87.265	0	379	0
Q92859	NEO1	R.TPASDPHGDN*LTYSVFYTK.E	0.402972	4	705.997	3	0.33	2.788	0.419	1000	0	470	0
Q92859	NEO1	R.TLSDVPSAAPQN*LSLEVR.N	0.318983	4	950.499	2	0.31	3.305	0.519	1000	0	639	0
Q92878	RAD50	K.QIITFFSPLTILVGPN*GAGK#.T	1.51404	4	1042.59	2	0.95	4.811	0.546	1000	0	38	0
Q95604	HLA-C	R.GYYN*QSEAGSHTIQR@.M	1.75991	0	860.399	2	-0.07	4.486	0.506	1000	0	110	0
Q969P0	IGSF8	R.IGPGEPLELLCN*VSGALPPAGR@.H	1.61133	1	1113.59	2	1.02	4.923	0.537	1000	0	327	0
Q96AP7	ESAM	R.LQGVPHVGAN*VTLSCQSPR@.S	1.28837	2	1015.03	2	0.18	4.23	0.594	1000	0	169	0
Q96J84	KIRREL	R.IDGGPVILLQAGTPHN*LTCR@.A	4.05654	2	714.384	3	0.36	3.836	0.405	1000	0	140	0
Q96J84	KIRREL	K.VGSTN*VSTLVNVHFAPR@.I	5.20266	5	903.988	2	-0.02	3.698	0.466	87.265	0	297	0
Q96PD2	DCBLD2	K.YCGLGLQMN*HSIESK#.G	2.32576	2	874.411	2	1.06	4.564	0.669	1000	0	155	0
Q96PD2	DCBLD2	K.GIPYYESSLANN*VTSVVGHLSTSLFTFK#.T	1.62006	1	1014.85	3	2.1	3.636	0	0	0	272	0
Q96PQ0	SORCS2	R.YVTCAIHN*CSEK#.M	1.3256	1	746.83	2	-0.41	3.063	0.61	1000	0	328	0
Q96S52	PIGS	K.TYN*ASVLPVR@.V	0.891712	2	564.816	2	0.09	2.483	0.461	1000	0	370	0
Q96T88	UHRF1	R.SYAM^QVNQPLQTVLNQLFPGYGN*GR@.-	1.62557	1	940.804	3	-0.09	4.141	0.305	57.047	0	791	0
Q99523	SORT1	K.LAN*NTHQHVFDDLR.G	0.548856	0	561.609	3	0.08	2.29	0.006	7.71	0	98	0
Q99650	OSMR	K.ILFYNVVVENLDK#PSSSELHSIPAPAN*STK#.L	3.57576	1	822.936	4	0.54	3.362	0.211	21.606	0	491	0
Q9BRK3	MXRA8	R.GSPGN*GSSHSGAPGPDPTLAR@.G	1.4148	2	964.459	2	0.75	2.276	0.398	1000	0	306	0
Q9BVK6	TMED9	R.FTFTSHTPGEHQICLHSN*STK#.F	0.196718	0	814.049	3	0.03	3.725	0.489	1000	0	125	0
Q9BXB1	LGR4	R.TIHLYDNPLSFVGNSAFHN*LSDLHSLVIR@.G	2.31586	1	822.931	4	0.88	5.005	0.219	21.746	0	294	0
Q9BY67	CADM1	K.VSLTN*VSISDEGR.Y	0.117615	6	690.349	2	-0.01	2.808	0.458	1000	0	113	0
Q9BZR6	RTN4R	R.DLGN*LTHLFLHGNR@.I	3.08026	2	539.289	3	0	3.1	0.249	63.076	0	179	0
Q9BZR6	RTN4R	R.VPPGDSPPGN*GSGPR.H	1.55622	2	697.333	2	-0.9	2.038	0.442	1000	0	372	0
Q9C0C4	SEMA4C	K.GKNN*QTECFNFIR.F	0.499394	2	815.881	2	0.76	3.051	0.017	24.437	0	106	0
Q9C0C4	SEMA4C	R.FLQPYN*ASHLYVCGTYAFQPK.C	0.271637	2	836.402	3	-0.99	2.983	0.249	1000	0	121	0
Q9C0H2	TTYH3	R.VWDTAVGLN*HTAEPSLQTLER@.Q	1.30572	2	1173.6	2	-0.1	4.213	0.611	1000	0	144	0
Q9H0X4	ITFG3	K.SDPHWESMLN*ATTR@.R	0.170217	2	827.38	2	0.32	2.502	0.507	1000	0	314	0
Q9H0X4	ITFG3	R.YKPDTLAVAVEN*GTGTDR.Q	0.548476	3	955.473	2	0.21	4.014	0.554	1000	0	389	0
Q9H2A7	CXCL16	K.ELTRPN*ETTIHTAGHSLAAGPEAGENQK.Q	0.374322	0	733.863	4	0.76	3.34	0.311	91.337	0	168	0
Q9H5V8	CDCP1	R.IGTFCSN*GTVSR@.I	9.122	1	654.316	2	0.46	3.026	0.536	1000	0	180	0
Q9H5V8	CDCP1	R.N*VSGFSIANR@.S	4.67106	2	537.282	2	0.77	2.475	0.267	139.126	0	205	0
Q9H5V8	CDCP1	R.ASVSFLNFN*LSNCER@.K	1.95796	2	883.921	2	-0.32	3.856	0.213	30.835	0	270	0
Q9H5V8	CDCP1	R.TCSSN*LTLTSGSK#.H	5.06742	1	683.828	2	0	2.111	0.37	1000	0	386	0
Q9H6B4	CLMP	R.HVYNN*LTEEQK#.G	4.82173	0	693.337	2	0.31	3.312	0.025	9.34	0	74	0
Q9H813	TMEM206	K.HHYEVIPPLTSPGQPGDMN*CTTQR@.I	1.03548	1	915.429	3	-0.76	4.329	0.399	1000	0	148	0
Q9H845	ACAD9	K.VWITN*GGLANIFTVFAK#.T	0.321023	0	931.515	2	2.06	4.129	0.293	81.692	0	216	0
Q9H8M5	CNNM2	R.VYGQNINN*ETWSR@.I	2.96113	2	795.381	2	0.17	3.006	0.033	9.34	0	112	0
Q9HAT2	SIAE	K.HSVLWNAMIHPLCN*MTLK#.G	0.129417	1	726.032	3	-1.1	3.559	0.439	49.418	0	267	0
Q9HCU4	CELSR2	R.FGSVLGN*YSCAAQGTQGGSK#.K	0.102589	0	1000.46	2	0.66	4.31	0.615	1000	0	1501	0
Q9HD45	TM9SF3	R.IVDVN*LTSEGK#.V	0.449206	1	593.321	2	0	2.658	0.415	1000	0	174	0
Q9NPR2	SEMA4B	R.K#IN*SSLQLPDR@.V	0.735527	3	644.371	2	0.38	2.591	0.388	1000	0	405	0
Q9NQS3	PVRL3	R.LDGQWPDGLLASDNTLHFVHPLTFN*YSGVYICK#.V	1.34588	3	947.964	4	-1.01	3.931	0.32	32.925	0	331	0
Q9NTK5	OLA1	K.GAHN*GQGLGNAFLSHISACDGIFHLTR@.A	2.29987	2	715.604	4	-0.15	4.998	0.045	24.222	0	102	0
Q9NV96	TMEM30A	R.YSLN*VTYNYPVHYFDGR.K	1.4289	2	1055.99	2	-0.34	4.475	0.27	59.298	0	294	0
Q9NWD8	TMEM248	R.N*VTHLYSTILGHQIGLSGR@.E	2.3729	1	692.378	3	-0.87	3.529	0.511	1000	0	132	0
Q9NY35	CLDND1	R.SPVQEN*SSDLNK.S	0.303286	15	660.812	2	0.5	2.89	0.311	65.44	0	42	0
Q9NZQ7	CD274	R.R@LDPEEN*HTAELVIPELPLAHPPNER@.T	2.36518	1	751.147	4	-0.04	4.286	0.379	179.741	0	219	0
Q9NZU0	FLRT3	K.VFFNLVN*LTELSLVR.N	0.316779	0	884.001	2	1.12	4.552	0.261	73.311	0	226	0
Q9P2B2	PTGFRN	K.ELDLTCN*ITTDR.A	0.180097	0	727.34	2	0.23	2.067	0.434	1000	0	300	0
Q9P2B2	PTGFRN	K.ENSGYYYCHVSLWAPGHN*R.S	0.331769	0	771.672	3	-1.1	2.736	0.484	84.892	0	383	0
Q9P2B2	PTGFRN	R.YSVLIMAEKPVGDLSSPN*ETK.Y	0.0533803	0	761.056	3	0.07	3.011	0.42	1000	0	600	0
Q9UBG0	MRC2	R.VTPACN*TSLPAQR@.W	4.88159	0	712.364	2	1.8	2.974	0.557	1000	0	69	0
Q9UBG0	MRC2	R.TSN*ISKPGTLER.G	7.16417	0	653.349	2	0.84	2.274	0.346	1000	0	140	0
Q9UIW2	PLXNA1	K.LSGN*LTLLR@.A	10.5301	1	498.308	2	0.16	2.736	0.453	1000	0	77	0
Q9UIW2	PLXNA1	R.VN*VSEDCPQILPSTQIYVPVGVVK#PITLAAR@.N	2.12727	1	1127.62	3	0.22	3.885	0.482	1000	0	701	0
Q9UIW2	PLXNA1	K.YN*YTEDPTILR@.I	2.74427	1	697.345	2	0.19	2.758	0.458	1000	0	1043	0
Q9ULF5	SLC39A10	R.GEPSNEPSTETN*K#TQEQSDVK#.L	2.69568	0	775.358	3	-0.02	2.222	0.33	16.198	0	218	0
Q9ULF5	SLC39A10	K.DLNEDDHHHECLN*VTQLLK#.Y	1.8474	0	781.033	3	-0.16	3.387	0.414	48.998	0	339	0
Q9ULI3	HEG1	R.TFLN*TTVEK#.H	3.55796	0	532.286	2	0.49	1.829	0.342	1000	0	1080	0
Q9UMS4	PRPF19	R.TNVANFPGHSGPITSIAFSEN*GYYLATAADDSSVK.L	0.565873	0	1202.24	3	-1.01	5.09	0.289	39.016	0	403	0
Q9UN71	PCDHGB4	R.DQGSPALSAN*VSLR.V	0.71131	9	709.362	2	-0.36	2.565	0.34	1000	0	543	0
Q9UN76	SLC6A14	R.SPIVTHCN*VSTVNK.G	0.108056	0	779.893	2	0.18	3.879	0.513	100.207	0	174	0
Q9UN76	SLC6A14	K.GIQEIIQMN*K.S	0.0816643	0	588.813	2	0.12	2.03	0.284	1000	0	189	0
Q9Y4D7	PLXND1	R.RRGN*ISAVAVR.F	0.762892	1	401.238	3	-0.27	2.914	0.43	1000	0	155	0
Q9Y4D7	PLXND1	K.INLN*ESMQVVSR@.R	0.693612	2	699.866	2	0.74	3.238	0.245	48.874	0	500	0
Q9Y4D7	PLXND1	R.CTLQQDCTN*SSQQHFWTSASEGPSR.C	0.778166	2	972.412	3	0.12	3.759	0.602	1000	0	583	0
Q9Y5L3	ENTPD2	R.GFSTQVLLGDVYQSPCTMAQRPQNFN*SSAR.V	0.360176	2	1121.53	3	0.09	3.34	0.022	5.75	0	294	0
Q9Y639	NPTN	K.N*ASNMEYR.I	2.86061	7	494.208	2	0.18	1.976	0.467	42.098	0	197	0
Q9Y639	NPTN	K.AN*ATIEVK#.A	3.9151	7	428.741	2	0.43	2.667	0.233	1000	0	229	0
Q9Y639	NPTN	R.K#K#ENGMPMDIVN*TSGR@.F	3.01833	9	601.308	3	0.17	3.641	0.138	100.017	0	284	0
Q9Y6M7	SLC4A7	K.KDN*ITAHNISWR.N	0.351464	13	486.584	3	0.02	3.475	0.377	84.359	0	786	0
P48960	CD97	R.WCPQN*SSCVN*ATACR@.C	1.89638	6	911.872	2	-1.18	3.8	0.603	1000	1000	33	38
Q8WTV0	SCARB1	R.HK#SN*ITFNNN*DTVSFLEYR@.T	1.12885	8	773.711	3	-0.81	3.669	0.066	27.121	17.009	102	108
Q9H7M9	C10orf54	R.N*LTFQDLHLHHGGHQAAN*TSHDLAQR@.H	1.26221	0	733.359	4	0.22	4.033	0.446	1000	1000	91	108
P20645	M6PR	R.LN*ETHIFN*GSNWIMLIYK.G	0.223919	1	1100.06	2	5.29	3.954	0.252	80.999	24.243	107	113
Q7KYR7	BTN2A1	R.GSVALVIHN*ITAQEN*GTYR@.C	0.614996	6	1028.03	2	0.79	5.308	0.61	1000	1000	114	120
P11279	LAMP1	R.YSVQLMSFVYN*LSDTHLFPN*ASSK#.E	0.243155	1	1381.67	2	2.39	4.302	0.52	1000	1000	121	130
Q8TCT8	SPPL2A	R.DMN*QTLGDN*ITVK#.M	3.27785	1	731.852	2	0.04	3.821	0.433	1000	1000	149	155
P23470	PTPRG	K.VEFHWGHSN*GSAGSEHSIN*GR@.R	7.2408	1	570.009	4	0.36	2.735	0.316	1000	1000	156	166
Q12913	PTPRJ	K.TITVVHQPWCN*ITGLR@PATSYVFSITPGIGN*ETWGDPR@.V	0.307839	2	1065.54	4	0.01	3.749	0.295	1000	1000	172	192
Q9H5V8	CDCP1	R.N*VSGFSIAN*R@.S	2.15599	2	538.777	2	1.15	1.899	0.334	1000	1000	205	213
Q12913	PTPRJ	R.LQVN*ISGLK#PGVQYNINPYLLQSN*K#.T	5.92473	1	941.519	3	0.26	6.423	0.252	117.312	49.59	258	278
P08648	ITGA5	K.GN*LTYGYVTILN*GSDIR@.S	3.43533	0	934.48	2	0.51	4.524	0.512	1000	1000	297	307
Q12913	PTPRJ	R.YN*ATVYSQAAN*GTEGQPQAIEFR.T	4.31497	1	1261.09	2	2.8	4.277	0.646	1000	1000	342	351
P40189	IL6ST	K.SHLQN*YTVN*ATK#.L	6.96658	1	695.348	2	0.51	3.676	0.572	1000	1000	379	383
Q12913	PTPRJ	K.VSDN*ESSSN*YTYK#.I	7.83998	1	754.319	2	0.27	3.478	0.527	1000	1000	391	396
O15031	PLXNB2	R.GGLN*LTAVTVAAENN*HTVAFLGTSDGR@.I	3.01603	1	899.79	3	-0.51	4.256	0.029	67.704	0	391	402
Q6UXG2	KIAA1324	K.TNN*STCQPCPYGSYSN*GSDCTR.C	0.281645	4	844.655	3	0.73	3.03	0.012	0	132.718	391	404
P56159	GFRA1	K.SN*VSGNTHLCISN*GNYEK.E	0.392387	2	1000.44	2	-1.83	5.69	0.131	22.011	30.835	406	417
P17301	ITGA2	R.AN*YTGQIVLYSVNENGN*ITVIQAHR@.G	4.46683	3	929.477	3	-0.42	4.381	0.052	121.092	20.167	460	475
P05556	ITGB1	R.KEN*SSEICSNN*GECVCGQCVCR.K	2.66341	5	885.012	3	1.43	4.991	0.109	76.035	30.835	520	528
O14672	ADAM10	R.EGICN*GFTALCPASDPK#PN*FTDCNR@.H	1.64006	1	954.42	3	-2	3.385	0.044	51.727	14.062	537	551
P08069	IGF1R	R.TN*ASVPSIPLDVLSASN*SSSQLIVK.W	0.317604	1	1267.18	2	2.19	2.818	0.409	1000	1000	607	622
Q14118	DAG1	K.LAFAFGDR@N*CSTITLQN*ITR@.G	11.4102	0	772.733	3	0.14	4.526	0.465	1000	1000	641	649
P08648	ITGA5	R.HPGN*FSSLSCDYFAVN*QSR@.L	1.4062	0	1099.49	2	0.93	3.546	0.543	1000	1000	712	724
P08069	IGF1R	R.SRN*TTAADTYN*ITDPEELETEYPFFESR.V	0.274561	1	1101.49	3	0.38	4.709	0.108	1000	1000	756	764
P54289	CACNA2D1	R.HLVN*ISVYAFN*K#.S	2.31924	5	709.881	2	-0.11	3.227	0.511	1000	1000	888	895
P32004	L1CAM	K.DHVVVPAN*TTSVILSGLR@PYSSYHLEVQAFN*GR@.G	2.17385	4	911.978	4	0.25	2.879	0.307	1000	1000	876	899

## Sheet: Description
Column Heading	Description
UniProt name	UniProt symbol of the protein
Gene symbol	Gene symbol for the assigned N-sialoglycoprotein
Sequence	Sequence of the N-sialoglycopeptide obtained by ModScore, *-N-sialoglycosylation site; ^-methionine oxidation; @-heavy isotope labled arginine; #-heavy isotope labled lysine
Peptide ratio	Peptide ratio between MDA-MB-231 and MCF-7 cells
Redun	Number of proteins to which this sequence may be matched
Obs m/z	Observed mass-to-charge ratio of the indicated peptide
z	Charge state of the peptide
ppm	Mass accuracy of the peptide
XCorr	SEQUEST XCorr
Delta Corr	SEQUEST delta Cn score
ModScore 1	Best ModScore matching the first indicated N-sialoglycosylation site
ModScore 2	Best ModScore matching the second indicated N-sialoglycosylation site
Site 1	The first N-sialoglycosylation site location, as determined by ModScore
Site 2	The second N-sialoglycosylation site location, as determined by ModScore
		Peptide ratio	Redun	Obs m/z	z	PPM	XCorr	Delta Corr	Modscore 1	Modscore 2	Site 1	Site 2
