# Supplementary material for: Systematic and site-specific analysis of N-sialoglycosylated proteins on the cell surface by integrating click chemistry and MS-based proteomics
Source: Royal Society of Chemistry journal article supplement (doi:10.1039/c5sc01124h), 2015-01-01
Supplement: c5sc01124h13.xlsx [file c5sc01124h13.xlsx]

## Sheet: cell adhesion
Table S8. Up-regulated N-sialoglycoproteins related to cell adhesion
Gene symbol	Gene name
CD151	CD151 molecule (Raph blood group)
CD44	CD44 molecule (Indian blood group)
CD47	CD47 molecule
CD97	CD97 molecule
FAT1	FAT tumor suppressor homolog 1 (Drosophila)
FAT4	FAT tumor suppressor homolog 4 (Drosophila)
L1CAM	L1 cell adhesion molecule
PTK7	PTK7 protein tyrosine kinase 7
DSG2	desmoglein 2
DCBLD2	discoidin, CUB and LCCL domain containing 2
EGFR	epidermal growth factor receptor (erythroblastic leukemia viral (v-erb-b) oncogene homolog, avian)
ALCAM	hypothetical protein LOC100133690; activated leukocyte cell adhesion molecule
ITGA1	integrin, alpha 1
ITGA2	integrin, alpha 2 (CD49B, alpha 2 subunit of VLA-2 receptor)
ITGA3	integrin, alpha 3 (antigen CD49C, alpha 3 subunit of VLA-3 receptor)
ITGA5	integrin, alpha 5 (fibronectin receptor, alpha polypeptide)
ITGA6	integrin, alpha 6
ITGAV	integrin, alpha V (vitronectin receptor, alpha polypeptide, antigen CD51)
ITGB1	integrin, beta 1 (fibronectin receptor, beta polypeptide, antigen CD29 includes MDF2, MSK12)
ITGB4	integrin, beta 4
ITGB5	integrin, beta 5
ICAM1	intercellular adhesion molecule 1
ICAM2	intercellular adhesion molecule 2
MCAM	melanoma cell adhesion molecule
MSLN	mesothelin
NRP1	neuropilin 1
NPTN	neuroplastin
PTPRM	protein tyrosine phosphatase, receptor type, M
SEMA4D	sema domain, immunoglobulin domain (Ig), transmembrane domain (TM) and short cytoplasmic domain, (semaphorin) 4D
THBS1	thrombospondin 1
