# Supplementary material for: Systematic and site-specific analysis of N-sialoglycosylated proteins on the cell surface by integrating click chemistry and MS-based proteomics
Source: Royal Society of Chemistry journal article supplement (doi:10.1039/c5sc01124h), 2015-01-01
Supplement: c5sc01124h14.xlsx [file c5sc01124h14.xlsx]

## Sheet: Domain
Table S9. Domain analysis of up-regulated N-sialoglycoproteins in MDA-MB-231 cells
UniProt name	Domain name	Domain sequence range	E-value	Site	Ratio
D6RDV5	Cupredoxins	Region: 29-163	8.51e-53	162	3.2
O00478	Concanavalin A-like lectins/glucanases	Region: 332-513	1.15e-66
	Immunoglobulin	Region: 31-143	1.71e-19	115	3.72038
		Region: 156-236	4.94e-08
O14672	Blood coagulation inhibitor (disintegrin)	Region: 466-546	4.71e-12
	Metalloproteases ("zincins"), catalytic domain	Region: 218-454	8.86e-52
				551	2.68598
O14786	Concanavalin A-like lectins/glucanases	Region: 645-803	2.85e-36
	Galactose-binding domain-like	Region: 274-425	1.84e-49
		Region: 428-585	1.35e-43	522	6.96151
	Spermadhesin, CUB domain	Region: 34-141	1.83e-32
		Region: 146-263	1.7e-32	150	19.714
O15031	E set domain	Region: 892-981	1.87e-15
		Region: 800-894	3.23e-15
		Region: 980-1094	4.85e-06
	GTPase activation domain, GAP	Region: 1313-1442	5.49e-49
		Region: 1619-1805	5.49e-49
	Plexin repeat	Region: 469-518	4.71e-11
		Region: 764-797	0.0314
	Sema domain	Region: 24-466	1.16e-118	127	3.54295
	Ubiquitin-like	Region: 1466-1558	0.0653
				528	3.27376
				733	3.84758
				1099	2.772
O15427	MFS general substrate transporter	Region: 13-412	3.53e-54	149	2.02616
O75326	Immunoglobulin	Region: 545-621	7.62e-07
	Plexin repeat	Region: 493-529	7.5e-09
	Sema domain	Region: 65-496	1.31e-112	157	5.68792
O95084	Trypsin-like serine proteases	Region: 130-373	4.23e-31	207	5.69916
O95297	Immunoglobulin	Region: 41-150	8.8e-21	50	13.9462
P00533	Growth factor receptor domain	Region: 505-636	1.71e-24	603	10.0821
		Region: 186-339	1.81e-19
	L domain-like	Region: 328-520	1.64e-46
		Region: 31-209	3.97e-43
	Protein kinase-like (PK-like)	Region: 708-1003	8.23e-78
P01033	TIMP-like	Region: 24-202	8.83e-74	53	2.06201
P01130	Growth factor receptor domain	Region: 283-394	3.14e-15
		Region: 666-711	3.14e-15
	LDL receptor-like module	Region: 103-144	1.57e-11
		Region: 142-183	3.14e-11
		Region: 26-70	1.15e-10
		Region: 196-232	1.96e-10
		Region: 66-104	3.93e-10
		Region: 234-272	7.2e-10
		Region: 274-311	8.38e-08
	YWTD domain	Region: 398-661	2.75e-49
				657	7.79717
P01889	Immunoglobulin	Region: 208-300	2.83e-31
	MHC antigen-recognition domain	Region: 26-205	1.51e-80	110	5.33024
P01892	Immunoglobulin	Region: 210-300	1.33e-30
	MHC antigen-recognition domain	Region: 26-205	1.92e-83	110	19.9532
P04040	Heme-dependent catalase-like	Region: 9-498	1.05e-218	213	3.59614
P04156	Prion-like	Region: 119-228	4.19e-46	181	16.045
				197	9.39374
P04233	Class II MHC-associated invariant chain ectoplasmic trimerization domain	Region: 134-208	2.09e-34	136	3.77022
	Thyroglobulin type-1 domain	Region: 184-275	4.06e-23
				130	1.39905
P05362	Immunoglobulin	Region: 28-109	3.19e-26
		Region: 109-203	1.44e-22	183	7.80366
		Region: 213-309	1.24e-24	267	2.91845
		Region: 310-392	1.51e-09
		Region: 392-479	6.78e-10
P05556	EGF/Laminin	Region: 520-546	0.0268	520	5.67138
		Region: 554-592	6.98e-07
		Region: 595-636	5.3e-08
	Integrin beta tail domain	Region: 638-726	4.05e-22	669	9.96555
	Integrin domain	Region: 353-468	6.28e-22
	Plexin repeat	Region: 24-83	1.67e-13	50	1.90812
	vWA-like	Region: 138-380	2e-84	212	14.2129
				481	13.9825
P06213	Fibronectin type III	Region: 495-618	1.97e-33
		Region: 622-702	2.04e-19	698	4.0571
		Region: 808-832	2.04e-19
		Region: 802-944	6.85e-24
	Growth factor receptor domain	Region: 179-335	1.57e-14
	L domain-like	Region: 333-498	1.9e-52	445	4.98831
		Region: 33-194	7.09e-44
	Protein kinase-like (PK-like)	Region: 996-1290	1.5e-80
P06756	Integrin alpha N-terminal domain	Region: 31-468	1.16e-106	74	2.39562
	Integrin domain	Region: 769-997	1.15e-68	874	0.935397
		Region: 469-628	5.75e-46
		Region: 629-761	1.46e-36
P07204	C-type lectin-like	Region: 20-177	3.5e-18
	EGF/Laminin	Region: 405-444	8.2e-14
		Region: 365-405	9.84e-07
		Region: 441-472	1.24e-06
	Growth factor receptor domain	Region: 243-369	3.14e-10
P07737	Profilin (actin-binding protein)	Region: 2-140	1.44e-51	62	2.43572
P07996	Concanavalin A-like lectins/glucanases	Region: 955-1169	2.06e-107	1067	4.22061
		Region: 29-233	1.72e-39
	EGF/Laminin	Region: 547-601	2.3e-05
	FnI-like domain	Region: 317-374	3.87e-13
	TSP type-3 repeat	Region: 832-953	5.75e-37
		Region: 763-834	3.66e-14
		Region: 691-775	4.32e-12
	TSP-1 type 1 repeat	Region: 489-546	2.49e-17
		Region: 435-484	3.79e-16
		Region: 379-428	1.44e-10
P08581	E set domain	Region: 654-728	2.71e-15
		Region: 561-657	4.46e-15
		Region: 739-825	5.3e-11
	Plexin repeat	Region: 517-563	1.36e-12
	Protein kinase-like (PK-like)	Region: 1079-1341	1.89e-79
	Sema domain	Region: 40-515	7.06e-158	149	1.89336
				399	5.29342
P08648	Integrin alpha N-terminal domain	Region: 42-489	7.32e-97
	Integrin domain	Region: 789-1002	8.89e-51	868	15.3201
		Region: 491-647	2.25e-42
		Region: 648-782	9.42e-33	675	0.646244
				773	2.3425
P08962	Tetraspanin	Region: 105-202	2.48e-21	130	2.39745
P09603	4-helical cytokines	Region: 36-182	4.61e-73	154	26.1792
				172	2.44825
P13598	Immunoglobulin	Region: 25-110	1.2e-28
		Region: 108-206	3.19e-18	82	0.526553
				153	3.39015
				176	1.48797
P13726	Fibronectin type III	Region: 41-145	6.46e-27
		Region: 139-243	7.22e-36	156	11.0575
				169	73.657
P15514	EGF/Laminin	Region: 141-186	1e-12
				113	4.34348
P16070	C-type lectin-like	Region: 21-167	6.59e-53	57	11.351
P16144	CalX-like	Region: 990-1108	6.02e-20
	EGF/Laminin	Region: 467-493	0.0502
		Region: 507-538	0.00809
		Region: 537-575	2.76e-07
		Region: 579-616	3.91e-05
	Fibronectin type III	Region: 1128-1312	5.38e-36
		Region: 1526-1727	1.93e-34
	Integrin beta tail domain	Region: 624-709	1.83e-18	695	5.84519
	Plexin repeat	Region: 27-78	3.4e-09
	vWA-like	Region: 129-368	8.23e-72	327	11.375
P17181	Fibronectin type III	Region: 111-223	7.45e-25
		Region: 334-430	8.01e-23
		Region: 32-122	6.26e-20	81	4.06865
		Region: 229-339	7.76e-17
P17301	Integrin alpha N-terminal domain	Region: 30-149	3.14e-66	105	5.4315
		Region: 341-649	3.14e-66	343	3.84598
	Integrin domain	Region: 653-791	4.34e-17
		Region: 792-929	5.23e-25
		Region: 934-1135	2.72e-40	1057	13.5879
	vWA-like	Region: 169-364	3.67e-52
P18084	EGF/Laminin	Region: 474-501	0.0781
		Region: 518-549	0.0391
		Region: 549-587	5.3e-07	586	2.59053
		Region: 592-632	1.06e-07
	Integrin beta tail domain	Region: 633-715	9.15e-19
	Integrin domain	Region: 377-466	5.18e-30
	Plexin repeat	Region: 26-78	1.67e-12
	vWA-like	Region: 133-381	7.89e-82
P21589	5'-nucleotidase (syn. UDP-sugar hydrolase), C-terminal domain	Region: 337-548	3.14e-55
	Metallo-dependent phosphatases	Region: 28-332	1e-90
				333	54.6254
P21980	Cysteine proteinases	Region: 146-462	5.89e-127
	E set domain	Region: 3-144	2.06e-43
	Transglutaminase, two C-terminal domain	Region: 470-585	4.71e-33	517	2.19504
		Region: 586-686	1.1e-28
P22413	Alkaline phosphatase-like	Region: 196-577	1.62e-102	285	5.42472
				341	14.218
	His-Me finger endonucleases	Region: 672-911	6.47e-25
	Somatomedin B domain	Region: 105-150	5.23e-09
		Region: 151-191	8.5e-07
P23229	Integrin alpha N-terminal domain	Region: 24-232	1.7e-69
		Region: 296-505	1.7e-69
	Integrin domain	Region: 505-667	8.89e-33
		Region: 668-830	1.83e-27	770	4.27923
		Region: 833-1057	1.2e-54
P23470	(Phosphotyrosine protein) phosphatases II	Region: 827-1120	7.07e-106
		Region: 1124-1410	2.8e-74
	Carbonic anhydrase	Region: 59-319	2.62e-79
	Fibronectin type III	Region: 347-441	7.22e-13
P26006	Integrin alpha N-terminal domain	Region: 33-464	9.94e-74	86	22.8758
				107	3.73019
				265	24.0248
	Integrin domain	Region: 464-617	1.31e-25	511	9.383
				573	28.2818
		Region: 618-754	6.28e-22	656	7.96004
		Region: 759-995	7.85e-43	926	9.73479
				951	1.347
P28827	(Phosphotyrosine protein) phosphatases II	Region: 884-1191	1.9e-103
		Region: 1152-1450	1.5e-82
	Concanavalin A-like lectins/glucanases	Region: 22-183	1.11e-42
	Fibronectin type III	Region: 281-412	3.28e-14
		Region: 383-577	1.04e-28
		Region: 596-633	0.027
		Region: 686-734	0.027
	Immunoglobulin	Region: 190-288	6.6e-10	249	3.76683
P29317	Fibronectin type III	Region: 328-527	1.37e-30	407	6.25821
				435	5.34633
	Galactose-binding domain-like	Region: 28-199	7.65e-67
	Growth factor receptor domain	Region: 259-330	1.29e-05
		Region: 366-380	1.29e-05
	Protein kinase-like (PK-like)	Region: 605-909	2.73e-82
	SAM/Pointed domain	Region: 897-967	8.8e-19
P29323	Fibronectin type III	Region: 324-529	5.86e-41
	Galactose-binding domain-like	Region: 20-195	4.68e-77
	Growth factor receptor domain	Region: 253-324	3.14e-08	265	5.65862
		Region: 362-381	3.14e-08
	Protein kinase-like (PK-like)	Region: 613-914	1.33e-83
	SAM/Pointed domain	Region: 910-984	4.52e-21
P30479	Immunoglobulin	Region: 208-300	2.96e-31
	MHC antigen-recognition domain	Region: 26-205	2.49e-83	110	37.708
P30530	Fibronectin type III	Region: 224-421	3.21e-25	345	1.68197
				339	1.3696
	Immunoglobulin	Region: 36-130	5.68e-11
		Region: 139-224	1.14e-10	198	3.98782
	Protein kinase-like (PK-like)	Region: 528-817	1.6e-74
P32004	Fibronectin type III	Region: 625-810	1.66e-27	671	4.31317
				726	4.26324
				777	1.54237
		Region: 822-1003	2.74e-35	931	4.92099
				979	8.50346
		Region: 1028-1091	0.000465
	Immunoglobulin	Region: 31-136	1.67e-15
		Region: 139-214	2.91e-09	203	4.00361
		Region: 250-339	4.23e-20
		Region: 326-422	2.8e-17
		Region: 434-524	3.3e-17	479	2.77964
		Region: 520-615	1.53e-16
				247	4.63349
P35052	Frizzled cysteine-rich domain	Region: 245-295	0.0379
				79	1.47432
				116	5.73244
P36941	TNF receptor-like	Region: 49-102	8.75e-13
		Region: 101-182	2.56e-10	177	2.50125
P40189	Fibronectin type III	Region: 24-123	1.39e-46
		Region: 123-221	1.93e-26	157	0.577683
		Region: 220-326	1.46e-24
		Region: 324-411	1.82e-06	379	6.96658
				390	6.04922
		Region: 436-610	1.01e-19
P42892	Metalloproteases ("zincins"), catalytic domain	Region: 98-770	7.47e-253	166	8.3739
				270	2.84721
				316	1.94511
				539	3.12152
				651	2.38204
P43121	Immunoglobulin	Region: 33-139	5.02e-08
		Region: 136-225	4.56e-09
		Region: 249-341	7.57e-13
		Region: 346-415	2.91e-09
		Region: 430-514	1.02e-08
				418	2.40469
P48509	Tetraspanin	Region: 112-220	9.29e-16
P48960	EGF/Laminin	Region: 203-243	4.1e-09
	Family A G protein-coupled receptor-like	Region: 546-822	1.01e-06
	Growth factor receptor domain	Region: 26-99	0.033	38	19.525
		Region: 82-194	3.37e-11	108	6.96682
				371	10.7603
				453	61.1254
P50990	GroEL apical domain-like	Region: 215-379	1.52e-43
	GroEL equatorial domain-like	Region: 22-150	8.06e-80	50	2.04004
		Region: 406-529	8.06e-80
	GroEL-intermediate domain like	Region: 156-220	3.97e-21
		Region: 372-407	3.97e-21
P56199	Integrin alpha N-terminal domain	Region: 29-148	2.22e-73
		Region: 339-664	2.22e-73	532	5.84013
	Integrin domain	Region: 667-810	2.09e-33
		Region: 813-939	4.24e-22
		Region: 945-1145	7.32e-20
	vWA-like	Region: 167-360	3.56e-52
P62937	Cyclophilin-like	Region: 1-164	1.27e-79	108	3.46583
Q01973	Frizzled cysteine-rich domain	Region: 170-257	0.00275
	Immunoglobulin	Region: 62-154	8.83e-21
	Kringle-like	Region: 311-394	8.94e-34	315	3.16532
	Protein kinase-like (PK-like)	Region: 467-757	8.17e-76
Q03405	Snake toxin-like	Region: 109-209	1.7e-44
		Region: 215-295	1.96e-18	222	2.43311
		Region: 23-101	3.59e-16
Q07954	EGF/Laminin	Region: 802-847	3.74e-07
		Region: 3785-3831	1.08e-05
		Region: 3824-3860	0.000168
		Region: 4153-4186	0.0519
		Region: 4197-4232	8.1e-05
		Region: 4234-4272	0.000456
		Region: 4269-4305	0.00446
		Region: 4376-4414	0.00405
	Growth factor receptor domain	Region: 105-190	1e-09
		Region: 477-519	1e-09
		Region: 1182-1261	3.92e-13
		Region: 1527-1579	3.92e-13
		Region: 1846-1887	2.04e-07
		Region: 2158-2194	2.04e-07
		Region: 2472-2524	2.04e-07
		Region: 2917-3021	1.57e-21
		Region: 3280-3341	1.57e-21
	LDL receptor-like module	Region: 24-63	2.75e-10
		Region: 71-106	1.83e-07
		Region: 848-890	5.5e-11
		Region: 889-931	4.19e-10
		Region: 929-968	1.7e-10
		Region: 974-1011	5.63e-10
		Region: 1013-1050	3.93e-10
		Region: 1057-1097	1.44e-09
		Region: 1105-1140	3.01e-07
		Region: 1143-1178	3.93e-07
		Region: 2524-2561	5.63e-08
		Region: 2560-2600	2.09e-09
		Region: 2600-2639	8.38e-09
		Region: 2659-2689	1.26e-06
		Region: 2693-2730	3.93e-10
		Region: 2733-2767	3.4e-09
		Region: 2773-2807	1.7e-08
		Region: 2815-2851	5.37e-09
		Region: 2853-2892	1.44e-08
		Region: 3331-3366	1.28e-08
		Region: 3369-3409	3.93e-10
		Region: 3411-3449	1.07e-08
		Region: 3448-3485	3.4e-09
		Region: 3487-3527	3.14e-10
		Region: 3531-3570	7.98e-10
		Region: 3569-3609	1.44e-10
		Region: 3611-3647	3.14e-10
		Region: 3653-3698	2.75e-10
		Region: 3695-3731	2.09e-05
		Region: 3740-3776	4.71e-08
	YWTD domain	Region: 200-469	1.57e-38	446	3.55648
		Region: 536-769	5.89e-40
		Region: 1269-1534	1.57e-52	1511	1.56401
		Region: 1584-1841	4.05e-43
		Region: 1892-2152	4.32e-45
		Region: 2201-2470	9.42e-35
		Region: 3029-3287	7.46e-57	3089	3.02314
		Region: 3874-4145	9.02e-44
Q08722	Immunoglobulin	Region: 33-129	4.69e-06	73	2.3365
				111	1.96285
	MFS general substrate transporter	Region: 144-288	0.0379
Q10589	Prefoldin	Region: 64-143	0.00165	65	9.00296
				92	1.23358
Q12913	(Phosphotyrosine protein) phosphatases II	Region: 1016-1300	3.14e-105
	Fibronectin type III	Region: 119-270	1.08e-11
		Region: 326-364	0.00151
		Region: 370-540	2.13e-15	413	5.86589
		Region: 538-700	4.98e-14
		Region: 735-866	3.61e-07	824	5.52395
Q13308	Immunoglobulin	Region: 31-110	1.53e-10
		Region: 126-219	3.75e-17	175	1.89021
		Region: 227-315	1.31e-12	283	2.71688
		Region: 329-418	1.03e-14	405	0.384818
		Region: 412-501	3.4e-19
		Region: 502-589	1.78e-14
		Region: 594-687	2.52e-21	646	1.56152
	Protein kinase-like (PK-like)	Region: 778-1059	1.31e-69
				116	1.65766
Q13740	Immunoglobulin	Region: 32-137	1.74e-09	95	3.13616
		Region: 157-234	7.53e-08	167	3.48438
		Region: 251-329	7.92e-10	265	0.519808
		Region: 334-392	1.39e-11
		Region: 385-491	8.9e-08
		Region: 435-449	1.39e-11
				480	3.97747
				499	2.68356
Q14126	Cadherin-like	Region: 82-159	7.57e-11
		Region: 147-285	1.23e-25	182	1.49211
		Region: 265-359	6.28e-13
		Region: 387-499	1.31e-14	462	2.7468
		Region: 505-593	7.33e-05
Q14517	Cadherin-like	Region: 33-149	5.71e-09
		Region: 137-259	8.42e-25
		Region: 273-352	0.0005
		Region: 367-453	1.38e-09
		Region: 457-558	3.57e-21
		Region: 562-663	6.94e-15
		Region: 709-814	1.96e-21
		Region: 816-919	3.28e-26
		Region: 921-1024	6.85e-28
		Region: 1020-1138	2.28e-26
		Region: 1127-1256	1.7e-31
		Region: 1233-1347	5.57e-17
		Region: 1358-1456	9.42e-18
		Region: 1450-1554	9.42e-22
		Region: 1556-1657	1.71e-27
		Region: 1660-1781	4.71e-21
		Region: 1759-1879	4.57e-25
		Region: 1872-1969	1.96e-16	1940	6.41145
		Region: 1978-2081	7.85e-15
		Region: 2069-2176	1.23e-23
		Region: 2176-2283	3.53e-20
		Region: 2276-2382	4.97e-27
		Region: 2383-2483	8.14e-21
		Region: 2486-2596	1.28e-19
		Region: 2584-2694	9.71e-20
		Region: 2700-2809	1.41e-13
		Region: 2803-2911	5.14e-28
		Region: 2912-3023	2.57e-22
		Region: 3017-3125	7.46e-27
		Region: 3119-3222	1.71e-28
		Region: 3223-3327	1.57e-30
		Region: 3329-3440	1.96e-31
		Region: 3433-3537	6.42e-22
		Region: 3542-3631	4.43e-09
	Concanavalin A-like lectins/glucanases	Region: 3815-4009	6.43e-38
	EGF/Laminin	Region: 3794-3825	0.0492
		Region: 4014-4056	7.22e-07
		Region: 4053-4089	3.73e-07
		Region: 4092-4130	1.54e-08
		Region: 4127-4165	4.07e-09
				3640	2.07563
Q29983	Immunoglobulin	Region: 207-291	5.99e-21	220	2.08688
				261	1.00469
				289	12.8034
	MHC antigen-recognition domain	Region: 23-198	1.53e-51	79	5.70509
				125	2.30114
Q6V0I7	Cadherin-like	Region: 68-135	6e-09
		Region: 129-250	9.57e-19
		Region: 238-357	4.71e-31
		Region: 346-467	2.71e-16
		Region: 463-585	2.43e-28	483	0.489354
		Region: 575-681	4.71e-25	676	1.63983
		Region: 682-785	2.75e-28
		Region: 788-893	3.14e-22
		Region: 881-988	1.44e-26
		Region: 984-1092	3.14e-26
		Region: 1088-1202	4e-21
		Region: 1204-1315	8.99e-29
		Region: 1309-1412	3.4e-29
		Region: 1408-1536	6.02e-27
		Region: 1517-1623	3e-16
		Region: 1627-1732	1.03e-10
		Region: 1733-1834	5.5e-24
		Region: 1835-1944	1.43e-26
		Region: 1933-2056	2.71e-28
		Region: 2046-2147	1.21e-27
		Region: 2142-2272	1.06e-34
		Region: 2253-2364	2.14e-24
		Region: 2352-2458	5.57e-26
		Region: 2454-2566	9.29e-23
		Region: 2564-2669	2.86e-19
		Region: 2663-2773	2.86e-29
		Region: 2767-2864	2.62e-22
		Region: 2865-2975	8.57e-22	2921	2.27529
		Region: 2971-3095	6.54e-25
		Region: 3083-3194	3.14e-27
		Region: 3182-3292	5.14e-27
		Region: 3292-3397	1.71e-20
		Region: 3393-3514	1.19e-27
		Region: 3503-3606	5.23e-20
		Region: 3608-3698	0.00171
	Concanavalin A-like lectins/glucanases	Region: 3956-4162	6.73e-33
		Region: 4179-4401	3.36e-28
	EGF/Laminin	Region: 4428-4465	2.03e-06
	Growth factor receptor domain	Region: 3805-3817	4.71e-12
		Region: 3848-3942	4.71e-12
Q7Z4F1	LDL receptor-like module	Region: 139-176	1.44e-10
		Region: 328-353	0.000183
		Region: 356-397	0.00131
		Region: 398-436	2.09e-11
	Spermadhesin, CUB domain	Region: 35-134	3.4e-10	56	2.12292
		Region: 191-303	2.49e-17	299	2.61906
Q8IZF2	Family A G protein-coupled receptor-like	Region: 975-1295	0.000265
	Immunoglobulin	Region: 280-367	4.46e-10	301	0.509887
				315	2.3508
		Region: 473-552	1.59e-07
		Region: 383-466	0.0176
	SEA domain	Region: 170-279	7.45e-08	256	2.58677
				627	2.20756
				666	2.73616
Q8N441	Immunoglobulin	Region: 28-118	2.34e-20
		Region: 147-239	2.35e-20
		Region: 244-362	3.1e-16	255	1.29868
				293	4.86503
Q92542	Zn-dependent exopeptidases	Region: 188-201	2.15e-25
		Region: 238-487	2.15e-25	387	2.91269
				417	1.58672
				612	0.563671
Q92854	Immunoglobulin	Region: 563-650	4.52e-10
	Plexin repeat	Region: 502-552	1.14e-12
	Sema domain	Region: 26-500	3.66e-171	379	2.46579
Q96J84	Immunoglobulin	Region: 22-120	3.53e-15
		Region: 119-223	2.31e-17	140	4.05654
		Region: 219-304	6.61e-13	297	5.20266
		Region: 307-395	6.86e-18
		Region: 392-487	3.81e-11
Q96PD2	Galactose-binding domain-like	Region: 291-450	1.28e-52
	LCCL domain	Region: 191-288	4.18e-24
	Spermadhesin, CUB domain	Region: 78-187	6.15e-32	155	2.32576
Q99650	Fibronectin type III	Region: 336-522	2.12e-17	491	3.57576
		Region: 543-735	1.85e-16
		Region: 227-324	1.12e-15
Q9BXB1	Family A G protein-coupled receptor-like	Region: 540-830	1.92e-34
	L domain-like	Region: 32-314	9.07e-62	294	2.31586
		Region: 237-484	1.12e-35
Q9BZR6	L domain-like	Region: 28-307	7.37e-64	179	3.08026
				372	1.55622
Q9H5V8	Spermadhesin, CUB domain	Region: 232-274	2.88e-05	270	1.95796
		Region: 557-592	0.0628
				180	9.122
				205	4.67106
				386	5.06742
Q9H6B4	Immunoglobulin	Region: 26-132	2.96e-19
		Region: 128-228	1.83e-14
Q9H8M5	cAMP-binding domain-like	Region: 670-719	0.00065
	CBS-domain pair	Region: 433-577	4.64e-16
Q9NTK5	P-loop containing nucleoside triphosphate hydrolases	Region: 23-327	1.39e-79	102	2.29987
	TGS-like	Region: 305-386	6.32e-36
Q9NZQ7	Immunoglobulin	Region: 19-128	1.99e-15
		Region: 147-221	3.88e-10	219	2.36518
Q9UBG0	C-type lectin-like	Region: 235-368	2.82e-37
		Region: 376-507	6.07e-42
		Region: 518-653	6.87e-34
		Region: 661-811	7.93e-29
		Region: 827-953	1.06e-33
		Region: 960-1111	1.57e-33
		Region: 1126-1252	1.3e-24
		Region: 1256-1396	3.15e-27
	Kringle-like	Region: 172-230	1.31e-20
	Ricin B-like lectins	Region: 41-173	5.53e-26	69	4.88159
				140	7.16417
Q9UIW2	E set domain	Region: 861-959	3.66e-14
		Region: 958-1046	9.42e-16	1043	2.74427
		Region: 1045-1149	5.1e-16
		Region: 1146-1236	4.06e-07
	GTPase activation domain, GAP	Region: 1356-1482	7.85e-53
		Region: 1677-1866	7.85e-53
	Plexin repeat	Region: 515-567	1.57e-10
		Region: 814-847	2.75e-05
	Sema domain	Region: 43-512	1.01e-131	77	10.5301
				701	2.12727
Q9ULI3	EGF/Laminin	Region: 986-1034	1.48e-07
		Region: 1025-1062	5.11e-08
	Growth factor receptor domain	Region: 1148-1244	0.0337
				1080	3.55796
Q9Y639	Immunoglobulin	Region: 33-122	3.61e-16
		Region: 165-227	1.82e-09	197	2.86061
		Region: 229-334	3.95e-17	229	3.9151
				284	3.01833
